# Supplementary material for: SLeX decorated integrin α3 on sEVs promotes metastasis of bladder cancer via enhancing vascular permeability
Source: Research Square preprint supplement (doi:10.21203/rs.3.rs-4389823/v1), 2024-05-20
Supplement: Supplementary file 1 [file 1112780daa7bfd4396a35078.xlsx]

## Sheet: Sheet1
Supplemental Table 1: DNA oligo sequences
Use	Gene Symbol	Fw (5’-3’)	Rv (5’-3’)
PCR	hsa_FUT7	GGCTGACTGATCCTGGGAGA	GCCTGGTGGTTTGATTTCG
PCR	hsa_ITGA3	CTCACGCCCAGCTCCGC	TCAGTAGTCGTCGGTCAGCCTCT
shRNA	hsa_FUT7	CCGGACCTCCGAGGCATCTTCAACTCTCGAGAGTTGAAGATGCCTCGGAGGTTTTTTTG	AATTCAAAAAAACCTCCGAGGCATCTTCAACTCTCGAGAGTTGAAGATGCCTCGGAGGT
shRNA	hsa_ITGA3_1	CCGGGACCTCGCTTAGCATGGTAAACTCGAGTTTACCATGCTAAGCGAGGTCTTTTTTG	AATTCAAAAAAGACCTCGCTTAGCATGGTAAACTCGAGTTTACCATGCTAAGCGAGGTC
shRNA	hsa_ITGA3_2	CCGGCCTCTATATTGGGTACACGATCTCGAGATCGTGTACCCAATATAGAGGTTTTTTG	AATTCAAAAAACCTCTATATTGGGTACACGATCTCGAGATCGTGTACCCAATATAGAGG
qRT-PCR	hsa_FUT7	TGGCCCAGTACCGCTTCTA	TGCGTTGCGCCAGAATTTC
qRT-PCR	hsa_ITGA3	TCAACCTGGATACCCGATTCC	GCTCTGTCTGCCGATGGAG
qRT-PCR	hsa_GAPDH	GGAGCGAGATCCCTCCAAAAT	GGCTGTTGTCATACTTCTCATGG
