# Supplementary material for: SLeX decorated integrin α3 on sEVs promotes metastasis of bladder cancer via enhancing vascular permeability
Source: Research Square preprint supplement (doi:10.21203/rs.3.rs-4389823/v1), 2024-05-20
Supplement: Supplementary file 2 [file b97af0f138182350debf1485.xlsx]

## Sheet: Supplemental Table 4 .xlsx
Supplemental Table 4: The full list of proteins identified by 2D-LC-MS/MS
LFQ intensity KK47_1	LFQ intensity KK47_2	LFQ intensity KK47_3	LFQ intensity QE_1	LFQ intensity QE_2	LFQ intensity QE_3	C: Student's T-test Significant oe_kk47	C: Student's T-test significant	N: -Log Student's T-test p-value oe_kk47	p-value	N: Student's T-test q-value oe_kk47	N: Student's T-test Difference oe_kk47	N: Student's T-test Test statistic oe_kk47	T: T: Protein IDs	T: T: Gene names
1.81706	0.212417	0.0901804	-0.6982	-0.982099	-0.439359	+	oe_kk47	1.14967	0.0708484	0.0393994	-0.284396	-2.4447	A0A024QZP7;P06493;A0A087WZZ9;E5RIU6;E7EUK8;Q96Q40;O94921;Q07002	CDC2;CDK1
1.30525	0.885526	0.403416	-0.604407	-1.04234	-0.947445	+	oe_kk47	2.3874	0.00409827	0.00276209	-0.839678	-5.91202	A0A024QZX5;A0A087X1N8;P35237;A0A2R8YD12;A0A2R8Y6A7;A0A2R8YDD0;A0A2R8Y517	SERPINB6
0.822831	0.120961	-0.547991	0.382921	-1.72319	0.944466			0.105285	0.784721	0.855049	-0.10089	-0.29212	A0A024R161;P50151	hCG_1994888;GNG10
-0.178473	-1.34323	-0.995949	1.03762	0.745994	0.73404	+	oe_kk47	2.02217	0.00950233	0.00708321	0.262171	4.67227	A0A024R4E5;Q00341;H0Y394;H7C0A4;C9JIZ1;C9J5E5;H7C2D1;C9JZI8;C9JES8;C9JHZ8;C9JHS7;H7BZC3;C9JK79;C9JT62;C9JHN6;C9JEJ8;C9JBS3;C9JQ82;C9JMQ6;C9J739;C9JHS9	HDLBP
-0.0637935	1.42335	0.966649	-1.01271	-0.385308	-0.928188	+	oe_kk47	1.49069	0.032308	0.0182841	-0.347778	-3.21911	A0A024RA52;P25787;A0A7I2V2H3;A0A7I2YQP7;C9JCK5;H3BT36	PSMA2
0.55086	0.47001	0.508434	-1.93926	-0.226513	0.636471			0.603044	0.249434	0.182982	-0.915665	-1.34632	A0A024RAC6;Q14241	TCEB3
-1.30102	-0.630667	-0.720008	1.05902	0.822326	0.770347	+	oe_kk47	2.8254	0.00149486	0.00191803	0.765462	7.74818	P46379;A0A7I2V508;A0A0G2JK23;A0A024RCR6;A0A7P0MQS5;A0A0G2JL47;A0A0G2JJM1;X6REW1;F6S6P2;F6X9W3;F6U341;F6VEM6;A0A0G2JJR8;A0A7I2V3H1;F6UR09;F6TC96;F6WML8;A0A1B0GX79;H0Y710;F6XTU0;F6U1F2;H0Y4L1	BAG6;BAT3
0.756094	0.756094	1.08761	-0.763284	-0.468401	-1.36812	+	oe_kk47	2.42152	0.00378861	0.0025509	-0.200143	-6.04018	F8W809;A0A087WSW9;A0A182DWI3;A0A087WSY9;Q16881;E9PIR7;E2QRB9;E9PKD3;A0A0B4J225;E9PIZ5;E9PLT3;E9PKI4;E9PQI3;E9PRI8;E9PJU2	TXNRD1
1.37704	0.0481199	0.71484	-1.26693	-0.986174	0.113112	+	oe_kk47	1.17753	0.0664462	0.0365859	-0.230448	-2.5045	A0A087X2I2;A0A087WT12;P36969;K7ERP4;K7EJ20;K7EKX7;R4GNE4;K7ENB4;A0A087X247;A0A0A0MTT1	GPX4
-1.09792	-1.17166	0.0500145	0.969672	1.21567	0.0342136	+	oe_kk47	1.29689	0.0504789	0.0283653	0.260603	2.76713	A0A087WT20;Q9NV06;B3KME9;E5RHM4;A0A087X1F8	DCAF13
-0.0974367	1.15243	1.14887	-0.34295	-0.433759	-1.42715	+	oe_kk47	1.27189	0.05347	0.0303197	-0.521255	-2.71122	A0A087WT45;Q4V328;A0A087WXA6;A0A087WW92	GRIPAP1
-0.494204	-0.780271	-1.34546	1.03913	0.729496	0.851302	+	oe_kk47	2.55654	0.00277626	0.00217654	3.11698	6.57066	Q5JWB9;A0A087WTT2;Q96A57	TMEM230
-0.129654	-1.12284	-1.2563	0.767678	0.730802	1.01031	+	oe_kk47	1.98852	0.0102679	0.00761185	0.572689	4.56908	A0A087WTV6;Q96C36;A0A087WZR9;J3KR12;A0A087WX69;A0A087WZF0	PYCR2
1.05302	-1.64582	0.166938	-0.495726	-0.0312258	0.952811			0.114284	0.768628	0.842094	0.0442359	0.314834	A0A087WVR3;A0A087WTW0;Q96T88;A0A087WWG9;Q96PU4	UHRF1
0.974108	-0.163762	-1.72024	-0.00903995	-0.107444	1.02638			0.284022	0.51997	0.554035	0.258383	0.704513	A0A087WU02;Q96RQ1;H0YI50;F8VPA6;H0YI58;F8W0R1;H0YHJ8;F8VR88;F8VUZ2	ERGIC2
0.615469	0.6126	-1.87984	-0.378429	0.653371	0.376832			0.187255	0.649748	0.735132	0.435038	0.49007	A0A087WU07;R4GNA1;Q5TGZ0;A0A3B3IRY5;R4GMM1;R4GMY4	MINOS1;MINOS1-NBL1
-0.835303	1.04432	1.37293	-0.146298	-0.347159	-1.08849			0.638451	0.229905	0.164929	-0.266418	-1.4153	A6NNI4;A0A2R8Y478;A0A7I2V3T0;A0A7I2V3T7;G8JLH6;A0A087WU13;F5GXT1;P21926	CD9
-1.61718	-0.0798289	-0.686647	0.844295	0.837497	0.701869	+	oe_kk47	1.61781	0.0241096	0.0143721	0.323238	3.53556	Q8WYA6;A0A087WUB9;A2A2P1	CTNNBL1
0.759876	-1.10766	-1.1773	-0.0829272	1.30893	0.299091			0.600286	0.251023	0.184813	0.134721	1.34094	E9PL01;A0A087WUC6;E9PI68;Q15005;E9PRB9;H0YE04	SPCS2
-0.547544	1.2259	0.671754	-0.132202	0.387788	-1.6057			0.494277	0.320422	0.259	-0.15391	-1.13327	A0A087WUK2;O14979	HNRNPDL
1.24903	0.734975	0.677563	-0.73244	-1.11188	-0.817247	+	oe_kk47	2.92958	0.00117603	0.00146667	-0.369019	-8.25266	A0A087WUT6;O60841	EIF5B
-1.37164	0.312467	-0.695595	0.691077	-0.332388	1.39608			0.768512	0.170407	0.114216	0.028972	1.66917	Q99417;A0A087WV05;A0A0D9SEI7	MYCBP
0.627875	-1.91093	0.264422	0.827866	0.395915	-0.205148			0.329939	0.467801	0.468761	0.398064	0.801404	Q8WU79;A0A087WV97;X6RCC3	SMAP2
1.32958	-1.01654	-0.877143	-0.064229	1.09774	-0.4694			0.157769	0.695394	0.782402	0.0348568	0.420995	A0A087WVD7;Q9Y3D8;D6RDH4;A0A087WY94	TAF9;AK6
-1.18196	0.422132	-1.37658	0.696078	0.656961	0.783372	+	oe_kk47	1.17255	0.0672125	0.0370326	0.672874	2.49376	Q9NZM3;A0A087WVF7;E7EPJ2	ITSN2
-0.649782	-1.44209	-0.473849	0.882211	0.643972	1.03954	+	oe_kk47	2.23265	0.00585262	0.00418881	0.889477	5.35839	A0A087WVM4;B7ZM99;Q6UB35;H0Y327;Q5JYA8;Q5JYA3;Q4VXM0;Q4VXM1;Q4VXV2	MTHFD1L
-1.65494	-0.264667	0.466145	0.865056	1.0196	-0.431201			0.554935	0.278654	0.212209	0.0982157	1.25239	A0A087WVQ6;Q00610;J3KS13;K7EJJ5;J3KSQ2;J3QL20;J3KRF5;F5H5N6;A0A087WV74;A0A087WXH4	CLTC
0.183993	0.8926	1.01346	-0.328538	-0.0196776	-1.74184	+	oe_kk47	1.11078	0.0774854	0.0431996	-0.210332	-2.3621	A0A087WVZ9;P19388;A0A0A0MQR7;A0A087WWX0;A0A087WVN5;K7EQN2;K7EJ87	POLR2E
0.670986	-1.10177	-1.45966	0.726611	0.576005	0.587824			0.889324	0.129026	0.0793315	1.39656	1.90812	A0A087WW40;Q9Y371	SH3GLB1
0.931902	0.368611	0.754856	-1.83962	-0.0119708	-0.203776	+	oe_kk47	1.06753	0.0855993	0.0479234	-0.945752	-2.27135	C9JAG1;A0A087WW58;Q9C0D9	EPT1
-0.923429	-0.196219	-0.927151	1.6644	-0.259264	0.641668	+	oe_kk47	1.05719	0.0876617	0.048727	0.118191	2.24984	A0A087WWA3;Q4R9M9;O60333;A0A3B3ITK3;A0A3F2YNW9;A0A3B3IUA1;A0A3B3IU40;A0A3B3IT28;A0A3B3ITE5;A0A3B3ITF7;A0A3B3ITW6;Q12756;A0A0U1RQL3;H7C0K6;A0A6Q8PFJ8	KIF1B;KIF1Bbeta
0.524987	0.722406	1.35534	-0.653926	-1.11411	-0.834693	+	oe_kk47	2.43989	0.0036317	0.00258967	-1.62917	-6.11017	A0A087WWF1;Q8WWX9	SELM
-0.61721	1.18109	1.26222	-0.486211	-1.16835	-0.171537			0.829624	0.148039	0.0952545	-0.215469	-1.78949	Q9P2T1;H0YMB3;H0YNJ6;F8WAN9;A0A087WWM4;H0YLV5;H0YNS9;H0YLB8;H0YK13;H0YN22;H0YK71;H0YNH0;H0YL68;H0YKE1;H0YMR9;H0YMW6;H0YMV5	GMPR2
1.34433	1.22551	-0.521614	-0.604185	-0.79662	-0.647427	+	oe_kk47	1.05891	0.0873152	0.0485477	-0.511419	-2.25341	A0A499FJY3;A0A087WWP4;Q96T37;A0A494C001	RBM15
-2.02248	0.20742	0.495758	0.503229	0.539435	0.276641			0.477182	0.333287	0.274605	0.404825	1.09948	I3L2Z5;A0A087WWR2;P56270;I3L411;I3L4Y2;H3BPU3;I3L0M3;H3BQS2;H3BQI4;Q9HBE1	MAZ
0.512965	-1.73525	0.104134	0.255874	-0.368134	1.23041			0.375107	0.421593	0.393777	0.127038	0.894544	A0A087WWS1;Q96FV9;R4GMN4;J3KT14;A0A087WY84;J3KRD7;J3QQZ3;R4GN58	THOC1
-0.677752	-0.906911	-1.09603	1.08434	0.981116	0.615239	+	oe_kk47	3.17634	0.000666285	0.0011985	0.44529	9.56929	A0A087WWU8;D6R904;A0A494C0G0;Q5VU61	TPM3
1.1893	0.638559	0.726793	-0.775884	-0.406902	-1.37187	+	oe_kk47	2.17935	0.00661683	0.00498228	-1.81284	-5.1777	E9PGF5;A0A087WWW7;A0A804HI61;A0A2R8Y4T1;E9PF55;A0A494C067;Q9HBL0;H0Y4U1;E7ERH1;E7EMG1;C9JI43;C9JFT7;C9J8K5;C9JZT0;F8VV64;Q63HR2	TNS1
-1.83125	-0.272974	0.164096	1.01885	0.663925	0.257352			0.938839	0.115123	0.0691408	0.515537	2.00753	O95299;E7ESZ7;A0A087WXC5;A0A7I2V594;A0A7I2YQU0;A0A7I2V2X3;A0A7I2V4N8;A0A7I2V2N6;H7C2X4;H7C1Y7;A0A7I2V5B2;A0A7I2V5U7;A0A7I2V419;A0A7I2V458;A0A7I2V2W9;A0A7I2V438;A0A7I2V5L0;A0A7I2V327;A0A7I2V3H5;C9J6X0;A0A7I2V2F6;A0A7I2V3D4;A0A7I2V2I6;Q8N1B9;A0A7I2V2J5;H7C2W5	NDUFA10
-0.174207	-1.69263	-0.402169	0.987974	0.370072	0.910964	+	oe_kk47	1.38107	0.0415844	0.0238747	0.996606	2.95927	A0A087WXK8;Q9H4H8	FAM83D
0.432332	1.17215	0.733945	0.0529416	-1.05723	-1.33415	+	oe_kk47	1.51614	0.0304691	0.0178113	-0.184118	-3.2811	A0A087WXM6;J3QQT2;J3KRX5;A0A0A6YYL6;P18621;J3QLC8;A0A0A0MRF8;J3KRB3;A0A087WWH0;J3QS96;A0A087WY81;J3KSJ0	RPL17;RPL17-C18orf32
0.134203	-1.26228	-1.23085	0.881331	0.789936	0.687667	+	oe_kk47	1.56069	0.0274986	0.0160937	0.446606	3.39123	Q9NP79;A0A087WY55;Q5TGM0	VTA1
1.13619	1.0807	0.101623	-1.41128	-0.201069	-0.706168	+	oe_kk47	1.47507	0.0334911	0.0190119	-0.249084	-3.18138	A0A087WY71;E9PFW3;Q96CW1;C9JJ47;H7C4C3;C9JTK4;C9JGT8;C9JJD3;C9JPV8	AP2M1
-0.674249	-1.59951	-0.115366	0.583695	0.863021	0.94241	+	oe_kk47	1.63099	0.0233889	0.0140964	1.98327	3.56937	A0A087WY82;Q9Y624	F11R
1.23938	-0.34229	0.620731	-1.31736	0.676283	-0.876738			0.595546	0.253778	0.187349	-0.159814	-1.3317	A0A087WYF7;Q6UXV4	APOOL
-0.409322	-1.74908	0.854041	-0.121149	0.631921	0.793589			0.46904	0.339594	0.281056	0.293434	1.08334	C9IYS7;A0A087WYI0;Q5TA45;J3QRY6;C9J979;Q96HV7	CPSF3L
-0.978689	-0.601398	1.89358	-0.167653	0.0945394	-0.240383			0.0814241	0.829041	0.887015	-0.0412661	-0.230461	Q7Z478;A0A087WYN9;H0Y8L1	DHX29
-0.732941	-0.749023	-1.10475	1.05329	0.321644	1.21178	+	oe_kk47	2.34397	0.00452929	0.00349206	0.115145	5.75215	Q15185;A0A087WYT3;B4DDC6	PTGES3
-1.79425	0.661368	1.1284	0.215854	-0.128307	-0.0830656			0.0010673	0.997545	0.997901	0.00109227	0.00327271	A0A087X1F5;A0A087WYV9;P57105;A0A087WTA2	SYNJ2BP-COX16;SYNJ2BP
0.338246	-0.882571	-1.56677	0.594597	0.485781	1.03071	+	oe_kk47	1.13822	0.0727411	0.0403914	0.523797	2.42028	A0A087WYW7;Q53FT3;E9PPG8	C11orf73
1.77025	0.0947062	-0.0271112	-1.06426	-0.847589	0.0740066			0.840173	0.144486	0.0930562	-0.280776	-1.81036	A0A087WZ13;E9PAU2;Q8IY67;K7EKR9;K7EQG2	RAVER1
-0.789786	-1.55571	-0.0724774	0.816745	0.771462	0.829769	+	oe_kk47	1.70423	0.0197592	0.0124605	3.16868	3.76092	E0YMJ8;A0A0C4DGS8;A0A087WZC2;P35680;A0A087WXS2;H0YND5;U3KQS6;A0A0A0MQU7;F5H0K0;A0A0A0MTK8;P20823	HNF1B
-0.215054	-0.836345	-1.30504	0.437609	0.450161	1.46867	+	oe_kk47	1.55514	0.0278522	0.0162779	0.562856	3.37741	A0A087WZF1;Q93052;C9JUT4;C9JXK9;C9JE51;C9J2R5;C9JIY7;C9JT42;C9J3U9;C9J1K7;C9J5C8;C9J4E3	LPP
0.0132737	-0.557447	1.62206	-0.897496	0.696011	-0.8764			0.356445	0.440104	0.423649	-0.05347	-0.856289	A0A087WZK9;B3KS98;O15372;E5RJT0;E5RGU4;E5RFH0;E5RFW7;E5RHC7;E5RH59	EIF3H
-0.558677	1.29776	-1.04742	0.890787	0.395614	-0.978058			0.0799668	0.831827	0.888608	0.0159849	0.226623	A0A087WZN1;O43837;A0A087X2E5;A0A0D9SG66	IDH3B
1.03276	-1.39869	-1.09986	0.604666	0.555072	0.30605			0.562537	0.273819	0.20739	1.36686	1.26726	J3KPF9;A0A087X011;E9PES4;Q9Y496;H7C2F6;C9J9X2;Q5JRK0	KIF3A
-0.191248	-1.46409	1.61103	0.0573868	0.325923	-0.338998			0.0106696	0.975732	0.984094	0.00126839	0.032365	A0A087X054;Q9Y4L1;A0A494C039;E9PJ21;A0A087WWI4;K7EQK2;J3KTF1;J3QL06;Q9BST8;J3QQH7;J3QLE9;A0A087X214;A0A087WW13	HYOU1
0.622057	0.958783	1.11417	-1.03561	-0.790256	-0.869139	+	oe_kk47	3.42225	0.000378225	0.000534562	-0.930457	-11.0736	A0A087X0H9;Q5T8P6;E2PSN0	RBM26
-0.248413	0.67443	0.950566	-0.931707	0.920546	-1.36542			0.509317	0.309516	0.245457	-0.130899	-1.1629	A0A087X0K1;Q9Y376;B7ZBJ4;Q5TAW7;Q9H9S4	CAB39
1.06758	-0.589648	-0.44877	1.25731	-1.31512	0.0286551			0.00699307	0.984027	0.989245	-0.00230726	-0.0212996	A0A087X0K9;G3V1L9;Q07157;A0A0G2JNH2;A0A7I2V5U5;G5E9E7;H0Y3R8;H0YKB1	TJP1
0.806785	-0.96919	-1.10471	1.25045	0.567631	-0.550959			0.449165	0.355496	0.300578	0.183231	1.04382	A0A087X0L7;J3KNA0;Q15070;E7EVY0;C9JC63	OXA1L
-1.04627	-0.249437	-1.22901	1.05052	1.00396	0.470231	+	oe_kk47	2.05	0.00891251	0.00659133	0.335345	4.75888	A0A087X0M4;Q9BWU0;A0A087WWF4;H7C256	SLC4A1AP
0.032684	-0.724652	-1.55546	0.300521	0.78793	1.15897	+	oe_kk47	1.34325	0.045368	0.0257033	0.715063	2.87219	A0A087X0Q1;Q7Z739;A0A024R7W5;A0A087WY31;A0A087X0C3;S4R373	YTHDF3
-1.73964	-0.308149	-0.127116	0.49283	1.16116	0.520921	+	oe_kk47	1.22774	0.0591916	0.0327371	0.404825	2.61366	A0A087X0R6;Q9UMY4	SNX12
-0.822182	-1.20095	-0.671575	0.980743	0.852038	0.861921	+	oe_kk47	3.41616	0.000383566	0.00053211	4.53757	11.0338	A0A087X0V4;Q8IWT0;A0A087WTK6;A0A087WUU3;F6SII6;A0A087WW18;S4R426;A0A087X1H4;D3DPQ2;H7C3R6;A8K0B5	ZBTB8OS
1.01544	0.702502	0.980681	-1.03417	-0.66056	-1.00389	+	oe_kk47	3.49713	0.000318324	0.000567237	-0.833385	-11.5743	A0A087X0W7;Q86TX2;A0A087WT95;P49753;G3V4F2;Q3I5F7	ACOT2;ACOT1
-0.547756	-0.344086	-1.57304	0.840776	1.01373	0.610373	+	oe_kk47	1.83904	0.0144864	0.00979161	0.687609	4.13063	Q8N6M0;A0A087X0W9;A0A0C4DH76	OTUD6B
-0.76621	-0.761348	-1.03532	1.44719	0.40844	0.707244	+	oe_kk47	2.21864	0.0060445	0.00435986	1.66442	5.31043	Q96NU0;A0A087X119;B1AM99;Q9BZ76;A0A087WXL9;A6NC89;A0A1B0GTE1;F2Z2X6;F2Z2X5;A0A087WUG9;A0A087WZ03;B1AMA2;A0A2P0CT92;F5H107;A0A0A0MR20;A0A087WTA1;A0A087X0T4;A0A590UJB1;E9PDN6;Q9C0A0	CNTNAP3B;CNTNAP3
-1.26551	-0.888539	-0.479867	0.671857	0.945744	1.01631	+	oe_kk47	2.66466	0.00216441	0.00204327	0.480344	7.0238	A0A087X142;A6NMH6;A6NFQ9;F8W8I8;Q92599;C9JV02;C9J4G8;A0A0A0MRP8	2022-09-08
0.781679	0.625007	1.25517	-0.77694	-1.08877	-0.796147	+	oe_kk47	2.93279	0.00116737	0.00148239	-1.74797	-8.26862	A0A087X1E4;P53365;E9PRV8;E9PPY7	ARFIP2
0.509067	1.07096	0.918682	-0.349959	-1.47368	-0.675075	+	oe_kk47	1.95177	0.0111745	0.00826957	-1.38452	-4.45834	A0A087X1G7;O60613;A0A0J9YX89;A0A087WXL0;A0A3B3IT39;A8MZD0	2022-09-15
-0.754784	-0.678502	-1.10475	0.747676	1.43729	0.353068	+	oe_kk47	2.10512	0.00785019	0.00584194	0.355214	4.93405	A0A087X1Z3;Q9UL46;H0YM70;H0YKU2	PSME2
-0.837713	-1.04029	-0.841325	1.04267	0.926232	0.750431	+	oe_kk47	4.1296	7.41993e-05	0.000519231	0.961313	16.764	A0A087X211;Q8TCG1;F8WAX6;F8WF26	KIAA1524
0.737755	0.831668	1.03631	-1.37547	-0.471252	-0.759009	+	oe_kk47	2.45915	0.00347416	0.00262963	-1.35615	-6.18425	C9J453;A0A087X255;A0A6Q8PF94;O15344	MID1
0.704201	1.15093	-0.119487	-1.18362	0.621721	-1.17375			0.752941	0.176628	0.119247	-0.214572	-1.63866	A0A087X256;Q2M389;F8VYH7;F8W1W1	KIAA1033
-1.07003	-0.100176	-0.583682	1.51242	-0.649899	0.891365			0.767786	0.170692	0.114501	0.145193	1.66775	A0A087X2D5;Q9BRJ2;A0A0G2JMS5;A0A087WU62	MRPL45
0.94931	1.36941	-0.100971	-0.134564	-1.15429	-0.928897	+	oe_kk47	1.29396	0.0508206	0.0287294	-0.207269	-2.76056	A0A087X2H1;Q9ULT8;H0YJD4;H0YJP0;G3V4V5;A0A087WVU6	HECTD1
-0.616856	1.18687	1.3226	-0.672966	-0.973764	-0.245884			0.891424	0.128403	0.0786958	-0.197296	-1.91231	A0A087X2I1;P62333;H0YJC0;H0YJS8;H0YJX2;H0YJE9;H0YJT1	PSMC6
0.406826	1.04138	1.06127	-0.529226	-0.552533	-1.42771	+	oe_kk47	1.99105	0.0102082	0.00762315	-0.415374	-4.57678	P30566;A0A7P0Z472;A0A7P0T9A7;A0A096LNY6;A0A1B0GTJ7;A0A1B0GWJ0;A0A0A6YY92;A0A7P0T8E4;A0A1B0GTG9;A0A1B0GWF8;A0A096LNY5;A0A096LP92;A0A096LNY4;A0A096LPA2;A0A096LP72;B4DEP1;A0A1W2PRX2;A0A096LP76;A0A096LNT0;V9GY96	ADSL
-0.282056	1.41701	1.08452	-0.883281	-0.846259	-0.489926	+	oe_kk47	1.29674	0.0504964	0.0283988	-0.481012	-2.76679	A0A096LP25;Q2M2I8;E9PG46;Q6ZSR9;A0A096LNZ0;K4DI97;Q9NSY1	AAK1
0.719926	0.969487	1.01801	-1.0284	-0.977901	-0.701118	+	oe_kk47	3.7125	0.000193865	0.000707317	-1.64541	-13.1376	A0A0A0MQS1;Q53H96;B5MD87;F8WEI0;A0A087WTU2	PYCRL
1.08444	1.14516	0.369333	-1.09286	-0.90751	-0.59856	+	oe_kk47	2.41614	0.00383584	0.00262834	-0.482641	-6.01984	U3KQC1;A0A0A0MQU0;Q9BV38;K7EIR0;K7EML4;A0A087X237;K7EKX5	WDR18
-0.311798	-0.0228985	-1.81741	0.673044	0.577587	0.90148	+	oe_kk47	1.1946	0.0638852	0.0350578	0.925031	2.5414	A0A0A0MQU4;Q96I15;H7C3V9;H7C277;C9JNL5;H7C1N7;H7C4A1	SCLY
-0.91669	1.83459	-0.361149	-0.648561	0.391362	-0.299552			0.155364	0.699256	0.78497	-0.0935783	-0.415266	C9JP00;A0A0A0MQX8;Q9NR56;H7C4T5;Q86VM6;C9JCX1;H7C4Y1	MBNL1
0.606678	0.658894	1.04518	-1.12797	0.161474	-1.34425	+	oe_kk47	1.45959	0.0347064	0.0193968	-1.96246	-3.14421	H3BSZ4;A0A0A0MR05;Q9BVC4;H3BR25;H3BPT1;H3BN58;H3BM50;H3BPU5;H3BR38	MLST8
0.538665	-0.177639	1.68981	-0.210762	-0.713311	-1.12676	+	oe_kk47	1.06204	0.0866882	0.0482796	-0.440964	-2.25993	A0A0A0MR09;P43378	PTPN9
0.552216	-1.43648	-1.12817	0.744499	0.652796	0.615139			1.01707	0.0961457	0.0539425	3.75915	2.16688	A0A0A0MRJ0;A0A0A0MRJ1;Q5VT25;H0Y5V1;H0Y7V8;A0A0U1RRC3;H0Y6R0;Q09013	CDC42BPA
0.360654	-0.912876	-1.4088	0.939367	-0.058182	1.07984			0.960654	0.109483	0.0643047	0.141511	2.05167	A0A0A0MRJ6;P22061;F6S8N6;A0A3F2YNX8;C9J0F2;F8WDT3;F8WAV5;F8WAX2;H7C4X2	PCMT1
0.666908	1.40254	0.52254	-0.956229	-0.995123	-0.640638	+	oe_kk47	2.37439	0.00422289	0.00303739	-0.952045	-5.86374	F8W8M4;A0A0A0MRL6;A0A3B3IS55;O14639;J3QSX6;H0Y7N6;F6XFR5;A0A494C1P1;A0A494C1G0	ABLIM1
-0.95582	-0.648188	-1.10403	0.907038	0.938443	0.862553	+	oe_kk47	3.72972	0.000186329	0.000720497	3.94519	13.2709	A0A0A0MRM8;A0A1Y0BRN3;A0A590UJ40;E7EW20;Q9UM54;A0A590UKB0;A0A590UJ75;A0A0D9SGC1;A0A590UK22;A0A590UK71;A0A5F9ZI03;A0A590UJY4;A0A590UK86;Q5JVM0	MYO6
1.24663	0.837165	0.547977	-0.632604	-1.1517	-0.847468	+	oe_kk47	2.64716	0.00225341	0.00201422	-0.884399	-6.94867	A0A0A0MRM9;Q14978;S4R349;S4R402;S4R341;S4R3C2	NOLC1
1.9444	-0.313802	0.132296	-0.500767	-0.463619	-0.79851			0.775229	0.167792	0.112509	-0.303409	-1.68235	A0A0A0MRN5;Q9NZT2	OGFR
1.57822	0.725662	-0.407532	-1.14047	-0.717212	-0.0386586			0.895043	0.127338	0.0776299	-0.248367	-1.91955	B6VEX4;A0A0A0MRT6;Q8IZP0;H0Y6B5	ABI1
-1.91334	0.72025	-0.103697	0.405875	0.797592	0.0933247			0.464953	0.342805	0.28522	0.414595	1.07523	C9J8U3;A0A0A0MRW7;Q7Z2E3;A0A5K1VW64;A0A5F9ZI51;A0A5F9ZGW5	APTX
-0.406122	-0.949791	-1.27176	0.800089	0.861689	0.965891	+	oe_kk47	2.61467	0.00242845	0.00211601	1.02022	6.81105	A0A0A0MS51;A0A0A0MT01;P06396;A0A0U1RQL8	GSN
0.335933	0.782337	1.38445	-1.06047	-0.409853	-1.0324	+	oe_kk47	1.96617	0.0108101	0.00795311	-0.657527	-4.50152	A0A0A0MS99;I3L4X2;P33527;A0A7I2V2E0;A0A7I2V4C6;O15438	ABCC1
0.442566	-0.873363	0.21428	1.10198	-1.53568	0.650217			0.0547011	0.881655	0.920659	0.0160376	0.158619	A0A0A0MSA9;A0A0C4DG49;P15151	PVR
-1.14965	-0.633945	0.152725	1.74085	-0.383996	0.274011			0.672989	0.21233	0.149533	0.11218	1.48256	A0A0A0MSB8;Q9UPT5;B4DJ07;A0A0A0MRE1;B5MCY9;K7ERQ5;C9JME6;C9JKC2	EXOC7
-1.17691	-1.21828	0.202449	1.24552	0.685455	0.261774	+	oe_kk47	1.25465	0.0556352	0.0312839	0.291397	2.67295	A0A0A0MSI8;O00471;F8W9B8;G3V4Z7	EXOC5
0.807423	0.857382	0.990434	-0.536408	-1.28252	-0.836313	+	oe_kk47	2.86134	0.00137613	0.00167089	-3.09142	-7.91897	A0A0A0MSS8;P42330;S4R3Z2;S4R3D5;A6NHU4;Q04828;P17516;H0Y804	AKR1C3
-1.46165	-0.655669	-0.457625	0.818183	0.954912	0.801852	+	oe_kk47	2.27979	0.00525061	0.00386655	1.37777	5.52238	A0A0A0MST8;E9PFN4;Q9Y6M7;C9JRP1;H7C3C4	SLC4A7
0.827549	0.85947	0.743114	-0.0180385	-0.966433	-1.44566	+	oe_kk47	1.73714	0.0183172	0.0115707	-1.55479	-3.84906	A0A0A0MSU2;A0A1C7CYX1;Q6PJG2;H7C1L3	ELMSAN1
-1.29975	0.89921	-1.05317	0.719466	-0.183197	0.917444			0.555091	0.278554	0.212283	0.102696	1.2527	Q5T6K7;E9PI99;A0A0A0MT00;Q5T6K5;Q13952;E9PJA8;E9PQR2;E9PL11	NFYC
0.684181	0.768648	1.18895	-0.553598	-1.18686	-0.901313	+	oe_kk47	2.73203	0.0018534	0.00176604	-0.49206	-7.31977	A0A0A0MT83;P26440;A0A0S2Z4K7;H7C4G6;H0YLC3;H0YN10;H0YKV0;A0A087WVD3	IVD
1.07729	0.195088	1.26895	-0.945765	-0.906768	-0.688798	+	oe_kk47	2.11935	0.00759714	0.00562602	-0.592152	-4.98005	A0A0A0MTB8;Q8NI36	WDR36
0.853372	0.854557	0.836883	-1.36624	-0.963439	-0.21513	+	oe_kk47	2.13463	0.00733449	0.00533773	-0.824999	-5.02979	A0A0A0MTR7;A0A0A0MTC1;Q63HN8;I3L3H9	RNF213
-0.884081	-0.971758	-0.829795	0.659588	0.791616	1.23443	+	oe_kk47	3.25357	0.000557738	0.00105556	0.277045	10.0197	A0A0A0MTH3;Q13418;A0A087WWY6;E9PQ52;A0A087WW45	ILK
0.623288	-0.294565	1.49438	-0.0554	-1.48639	-0.281319			0.826957	0.148951	0.0958891	-0.191628	-1.78422	A0A0A0MTH9;O14981	BTAF1
-0.702985	-0.472078	-1.42003	0.877145	0.75555	0.962402	+	oe_kk47	2.39283	0.00404734	0.00256977	0.990294	5.93226	A0A0A0MTI1;Q15392;A0A3B3IRV7;A0A3B3ISR5;A0A3B3ITT9	DHCR24
-0.709925	-1.14893	-0.851497	0.886416	0.88185	0.942086	+	oe_kk47	3.7981	0.000159184	0.00075817	1.86868	13.8136	A0A0A0MTJ9;Q6PIU2;H7C046;F8WE33	NCEH1
-0.691896	-0.525199	-1.39284	0.720621	0.970923	0.918394	+	oe_kk47	2.48684	0.00325957	0.0024963	0.967375	6.2921	A0A0A0MTL6;Q6ZS17;H3BMG9;H3BSV5;H3BP86;H3BQI5;H3BSX9	FAM65A
-1.18704	-1.14122	-0.186321	1.0213	0.965519	0.527764	+	oe_kk47	2.01038	0.00976383	0.0072973	0.387519	4.63592	A0A0A0MTN0;Q13617;Q5T2B5;Q5T2B7	CUL2
0.0771258	-0.979263	-1.20149	1.4606	0.676065	-0.0330354	+	oe_kk47	1.12838	0.0744081	0.0415571	0.384234	2.39936	Q9Y3B3;A0A0A6YYA0;G3V2Y2	TMED7;TMED7-TICAM2
-0.697492	-1.32524	-0.200428	-0.0543509	0.893183	1.38432	+	oe_kk47	1.30273	0.0498047	0.0281155	0.265858	2.78026	Q6IBW4;A0A0A6YYG7;H0YC55	NCAPH2
0.509833	1.21497	0.729729	-0.827312	-1.41487	-0.212351	+	oe_kk47	1.80738	0.0155819	0.010345	-0.550156	-4.04172	A0A0A6YYI3;A0A0B4J1V8;Q9NQ55;A8MV53;H7C446;C9J3W3;C9JHF7	PPAN-P2RY11;PPAN
-1.6218	-0.0514459	-0.658117	0.494432	0.952825	0.88411	+	oe_kk47	1.50134	0.0315254	0.0180387	0.642645	3.24496	A0A0A6YYJ5;O94854	MACF1
-1.05924	-1.10933	-0.488892	0.708121	0.91571	1.03364	+	oe_kk47	2.88477	0.00130386	0.00157803	0.528646	8.03213	A0A0A6YYL4;I3L167;E7EP81;Q9Y3D7;I3L1U7;I3L0X9;I3L3T0;I3L212;I3L2Y6;I3L442;I3L426;I3L1G9;A0A0B4J298;I3NI06;I3L359;I3L1M1;I3L351;I3L0X8	CORO7-PAM16
-0.54196	-0.975365	-1.12802	0.791369	1.18931	0.664673	+	oe_kk47	2.7645	0.00171989	0.00180928	2.403	7.46628	A0A0B4J1V9;Q9NRZ9;F6XU50;A0A087WSW7;Q9NW36;B1ALG6	HELLS
-0.802392	-1.55736	1.08715	0.714898	0.0760099	0.481698			0.452056	0.353138	0.297835	0.442077	1.04958	A0A0B4J1W0;O75448;B4DDR8;F5H5K2;F5GY88;E9PFL1;B9TX62	MED24
-1.09185	1.31784	-0.711765	0.828874	0.468239	-0.811335			0.132698	0.736719	0.817639	0.0435994	0.360479	A0A0B4J1Z1;C9JAB2;Q16629;F8WEA1	SRSF7
-0.628589	-0.348656	-1.50148	0.673851	0.632218	1.17265	+	oe_kk47	1.88334	0.0130816	0.00910297	2.53312	4.25732	A0A0B4J2A0;Q9UHJ6	TRPV1;SHPK
-1.91156	-0.0184994	-0.025709	0.44876	0.816788	0.690221			0.955108	0.11089	0.0653459	0.211795	2.04043	A0A0B4J2A4;P42765;K7EME0;K7EJ68;K7EJB1;K7ER88	ACAA2
-1.66062	-0.0489345	0.524328	1.22942	0.453598	-0.497801			0.407427	0.391357	0.349012	0.0992724	0.960139	Q5W0H4;A0A0B4J2C3;P13693;J3KPG2;E9PJF7;H0YCX0;Q56UQ5	TPT1
0.238717	-1.63402	-0.370843	0.347448	-0.000729243	1.41942			0.777928	0.166752	0.11159	0.188368	1.68765	A0A0B4J2F8;F6S314;E2QRJ6;P52435;A6NFM0;Q9H1A7;Q9GZM3;D6RAG0;E7EP90;A0A0B4J1Z8;F8WF84;E7EWC6;H0Y980	POLR2J3;POLR2J;POLR2J2
0.421543	1.34172	0.573675	-0.0186371	-1.10725	-1.21105	+	oe_kk47	1.51299	0.0306909	0.0178809	-1.01749	-3.27338	G3V5T0;A0A0C4DFM0;G3V4T6;O43708;A0A0A0MR33;G3V267;G3V3B9;H0YJN8	GSTZ1
-1.93256	0.0401046	-0.0322074	0.57814	0.56901	0.777517			0.923088	0.119375	0.0719466	1.52553	1.9758	A0A0C4DFM1;Q92544;F8WCN2;F2Z2L1	TM9SF4
-1.10906	-0.547318	1.70095	0.144796	0.424107	-0.613483			0.010735	0.975585	0.984241	-0.0090402	-0.0325608	A0A0C4DFN3;Q99685;A0A3B3ITT3;H7C4E0;E7EWX8;H7C599;C9JAM4;C9J8Q3;H7C5K5	MGLL
-0.346408	-1.06941	-1.20074	0.88804	0.786469	0.942045	+	oe_kk47	2.53233	0.00293542	0.00222222	2.74051	6.47274	Q9C004;A0A0C4DFS6;D6RB56	SPRY4
-1.33744	-0.851086	-0.396646	1.02284	0.60379	0.958546	+	oe_kk47	2.33529	0.00462072	0.00357621	0.823027	5.72062	Q12959;A0A590UJR5;A0A590UJS9;A0A590UJ18;A0A590UJ08;A0A590UJ68;A0A590UJC5;A0A590UKA8;A0A0C4DFT3;A0A590UJD9;A0A590UJ81;A0A590UK48;A0A590UJR4;A0A590UK81;A0A590UJ29;A0A590UJX2;C9JUA9;A0A590UJ64;E7EQD7;A0A590UJL2;A0A590UK02;A0A590UJ25;A0A590UK70;B4E2H8;A0A590UJZ4;H7C166;A0A590UJ95;A0A590UK52;E9PIW2;B7Z2T4;E9PN83;F8VYC1;A8MUT6;C9JN61;C9JCP6;A0A3B3ISW2;Q15700;A0A3B3ITF1;K7EKP9;H7C325;K7EKU8;C9IYP1;A8MUT…	DLG1
1.95976	-0.457022	-0.159798	-0.854298	-0.438919	-0.0497196			0.490258	0.323401	0.262066	-0.335542	-1.12533	A0A0C4DFX9;Q9H3P2;H0Y3X6;C9JHL4;C9JEM7;H7C2C7;H7C0W2;H7C3C2;F8W954;F8WF98;H7C2M8	NELFA
-0.19266	0.587933	1.71363	-0.86588	-0.340104	-0.90292	+	oe_kk47	1.13532	0.0732285	0.0408491	-0.119454	-2.41411	C9J9K3;A0A0C4DG17;P08865	RPSA
-0.544127	-1.59154	-0.314135	1.031	0.746579	0.672223	+	oe_kk47	1.7933	0.0160953	0.0105062	2.06506	4.00258	E9PEZ7;E7EW77;E7EP65;A0A0C4DG21;A0A7D9NKC8;F8WAL6;Q9NYB9;F8WBL5;A0A0A0MQU9;F8WEB9;H7C3Q7	ABI2
1.01325	1.04982	-1.67055	-0.270073	-0.0574677	-0.0649754			0.104311	0.786482	0.856728	-0.102113	-0.289644	A0A0C4DG40;Q8NF91;H0Y325;H0YGD3;A0A5F9ZH86;A0A0C4DH48;A0A5F9ZH87;A0A5F9ZHB2;A0A5F9ZHE1;Q5JV20;F8WAI0;H0Y326	SYNE1
1.40533	-0.244383	-1.20036	-0.779776	-0.129325	0.948511			0.00947666	0.978416	0.986038	0.00661023	0.0287842	F5GYV5;H7BZV4;A0A0C4DG62;F8WCT1;Q66PJ3;F8WEP2;A0A0C4DH18	ARL6IP4
1.01289	-1.65012	-0.419151	-0.169807	0.229135	0.997053			0.346698	0.450093	0.440719	0.500849	0.836185	A0A0C4DG88;P14859;H0YLC5;U3KQ96;U3KQN1;H0YNW1;H0YLL6;B5ME60;A0A0A0MT46;H0YKT2;Q9UKI9;P09086	POU2F1
0.962734	1.03275	0.716087	-1.06503	-0.867724	-0.77882	+	oe_kk47	3.83635	0.000145764	0.000367347	-1.24276	-14.1264	A0A0C4DGA2;O75521;F1LLU7;F8WAW4;C9JB63;F8W6J1	ECI2
-0.862809	-0.958227	-0.835348	0.561108	0.793058	1.30222	+	oe_kk47	2.87329	0.00133878	0.00154674	1.62835	7.97651	Q14527;A0A0C4DGA6;H7C5K0	HLTF
-1.21255	-0.846673	-0.620431	0.886062	0.76574	1.02785	+	oe_kk47	3.16096	0.000690303	0.00118519	0.477453	9.48188	Q14839;A0A2R8YFD8;A0A2R8Y425;A0A2R8Y5J0;A0A2U3TZM0;A0A2R8YFK9;F5GWX5;A0A2R8Y212;A0A2R8Y521;A0A0C4DGG9;A0A2R8YDJ9;A0A2R8YD40;A0A2R8Y4X2;A0A2R8YDW2;A0A2R8Y8C1;A0A2R8Y445;A0A2R8YER1;A0A2R8Y5Z7;A0A2R8Y685;A0A2R8Y8B3;A0A2R8Y7I0;A0A2R8Y7M9;A0A2R8Y5M9;A0A2R8YE38;F5H6N4;H7C3H7;A0A2R8Y6G9;A0A2R8Y7X1;F6T542;A0A2R8Y795	CHD4
1.8691	0.377299	-0.49734	-0.82268	-0.389467	-0.536912			0.763828	0.172255	0.11577	-0.536399	-1.65999	A0A0C4DGH0;Q5ZPR3;H0YK40;H0YK59;H0YL10	CD276
-1.29768	-0.674088	-0.628768	1.234	0.613256	0.753281	+	oe_kk47	2.42611	0.00374878	0.00256627	0.309812	6.05761	A0A0C4DGQ5;P04632;K7ELJ7;K7EKD8;A0A075B7C0;U3KQE2;K7EM73;K7EIV0;U3KPR7;K7EMQ1;K7ES78;Q96L46	CAPNS1
0.80527	1.22347	0.520007	-0.95722	-1.24381	-0.347717	+	oe_kk47	2.15224	0.00704304	0.00511814	-0.985835	-5.08766	A0A0C4DGQ8;Q6IAN0;J3KRS1;J3QLJ8	DHRS7B
-1.7933	-0.299346	-0.107393	0.889495	0.526886	0.783659	+	oe_kk47	1.26593	0.0542088	0.0305032	0.800922	2.69795	P39656;A0A0C4DGS1;U3KQ84	DDOST
0.0800832	-0.704505	1.66914	0.575544	-0.993649	-0.626613			0.341472	0.455542	0.448738	-0.233071	-0.82537	A0A0C4DGV9;P49917	LIG4
0.50044	0.562607	1.35434	-1.13556	-1.13475	-0.147078	+	oe_kk47	1.70268	0.0198299	0.0124373	-0.475414	-3.75679	A0A0D9SEI3;A0A0D9SER5;A0A0D9SEN2;P21127;Q5QPR3;Q9UQ88;Q5QPR4;J3KS35;E7ESP2;Q5QPQ9;E9PFJ2;A0A087WYI9;A0A087X1I0	CDK11B;CDK11A
1.07035	0.661171	0.663955	-1.6091	-0.590639	-0.195739	+	oe_kk47	1.64657	0.0225647	0.0137335	-1.66542	-3.60958	H0YNT2;A0A0D9SES8;H0YKT5;H0YKN8;H0YL70;Q04726;H0YNI7;H0YLI3;K7EJR7;H0YKH0;H0YLW9	TLE3
-0.676029	-0.808502	-1.18393	0.760162	0.743239	1.16506	+	oe_kk47	3.01063	0.000975821	0.00140645	1.53675	8.66548	A0A0D9SEU5;R4GMX8;Q6VN20;R4GN91;R4GNA3;R4GMX7	RANBP10
0.593441	0.783135	1.17254	-0.529224	-0.597855	-1.42203	+	oe_kk47	2.15388	0.00701649	0.0051224	-0.279736	-5.09306	A0A2R8Y4A4;O00571;A0A0D9SG12;A0A0D9SF53;A0A2R8YF78;A0A0D9SFB3;A0A2R8YFS5;A0A2R8YFR4;A0A2R8YCW1;A0A2U3TZJ9;A0A2R8Y645;F6S8Q4;A0A2R8Y5G6;A0A2R8YDH3;A0A2R8Y7T2;A0A2R8YDT5;O15523;A0A0J9YVQ7;A0A2R8Y650;A0A087WVZ1;A0A2R8YCU0;C9J081;C9J8G5;A0A2R8YF89;A0A087WX09;A0A2R8Y770;A0A2R8Y4D2;D6RCM4;Q9NQI0;H0Y960	DDX3X;DDX3Y
0.435013	1.49681	-1.15175	0.568262	-0.59707	-0.751265			0.23337	0.584292	0.656076	-0.161856	-0.594304	A0A0D9SF70;G5E9L0;Q8N6H7;E9PQP3;H0YDN9;E9PIY6;E9PMU9;E9PMR9;E9PM63;E9PJT7;E9PK28;E9PN48;E9PNY8;H0YDX1;E9PM18;H0YF45	ARFGAP2
0.839992	0.894773	0.989218	-0.753596	-0.929882	-1.04051	+	oe_kk47	4.36933	4.27238e-05	0.00072	-3.91577	-19.2722	A0A0D9SFE4;A0A0U1RQP1;Q05193;A0A0D9SFB1;A0A1B0GU67;A0A1B0GUX5;H7C5U0	DNM1
-1.033	-0.738464	-0.898754	0.800051	0.626064	1.2441	+	oe_kk47	3.03254	0.000927812	0.00142251	0.961895	8.78029	A0A0D9SFJ1;Q9Y2Z9	COQ6
0.374045	1.16872	1.05678	-0.752482	-0.694032	-1.15303	+	oe_kk47	2.41995	0.00380233	0.00254582	-1.68934	-6.03424	Q92614;A0A0D9SFK2;H0YEV9	MYO18A
0.213738	1.13696	1.13	-0.838601	-1.22925	-0.412849	+	oe_kk47	1.88986	0.0128866	0.00914722	-0.887249	-4.27619	A0A0D9SFP2;E9PF18;Q16836;A0A1W2PNM1;A0A0A0MSE2;A0A1W2PQV5;A0A804HKJ2;A0A1W2PQ78;A0A804HLB5;A0A1W2PQC2;A0A1W2PRT2;A0A804HJW7;A0A1W2PQ55;A0A804HJK7;A0A1W2PP40	HADH
-1.83082	-0.188397	-0.105522	0.474777	0.91124	0.73872	+	oe_kk47	1.15654	0.0697365	0.0387998	2.0189	2.45939	A0A0D9SG71;P49459;A0A0D9SEZ6;A0A0R4J2E5;H0YA80;P63146	UBE2A
0.691531	0.772073	0.794149	-0.372229	-0.112441	-1.77308	+	oe_kk47	1.36112	0.0435392	0.0249873	-0.529425	-2.9132	A0A0D9SG72;P61764;A0A1B0GWF2;A0A1B0GVQ5;A0A2R8Y5D4;A0A1B0GTP9;A0A1B0GW76;A0A0D9SFQ7;A0A0D9SFW6;A0A0D9SEP9;A0A0D9SEH5;A0A1B0GTD8;A0A096LP33;A0A096LP52;A0A1B0GVV9	STXBP1
0.0599158	-0.0130532	-1.92262	0.767927	0.334355	0.773476			0.875283	0.133265	0.0830126	0.878206	1.8801	A0A0D9SG88;P08603	CFH
-0.681174	-0.872818	-1.13024	0.820031	0.723926	1.14027	+	oe_kk47	3.23097	0.00058753	0.00103502	1.01129	9.88589	Q8IWS0;A0A0D9SGE8;Q5JRC6	PHF6
-0.743933	-1.04685	-0.866117	1.22876	0.90231	0.525833	+	oe_kk47	2.87874	0.00132209	0.00156447	1.87639	8.00287	A0A140T979;A0A0G2JH58;A0A140T9H4;A0A140T9D8;A0A0G2JH91;F5H7Q8;A0A140T9M6;Q29980;A0A0G2JHB5	MICB
-1.56527	-0.307504	-0.5273	1.03912	0.973271	0.387685	+	oe_kk47	1.65803	0.0219771	0.0134025	0.314646	3.63936	A0A0G2JH68;O60610;A0A140T8Z0;H9KV28;A0A2R8Y5N1;H7C2W8;B4E2I7;A0A2R8YEF8	DIAPH1
-1.00716	-0.769011	-0.837595	1.14849	0.345255	1.12003	+	oe_kk47	2.51288	0.00306987	0.00244828	0.558842	6.39496	A0A0G2JHC2;Q6NYC8	PPP1R18
-0.447878	-1.19697	-0.954902	0.506442	1.10746	0.985848	+	oe_kk47	2.42118	0.00379158	0.00254835	1.03963	6.03891	Q5SUL5;A0A0G2JIF2;A0A0G2JI36;A0A0G2JL56;A0A1W2PSE7;Q5SRN5;P04439;Q5SRN7;A0A1W2PS24;A0A1W2PQD0	HLA-A
0.420186	-0.899476	-1.59429	0.814394	0.720787	0.538395	+	oe_kk47	1.08994	0.0812943	0.0452408	0.113712	2.31823	A0A0G2JIW1;P0DMV9;P0DMV8;V9GZ37	HSPA1B;HSPA1A
0.429542	-1.57401	-0.893383	1.00125	0.512196	0.524407	+	oe_kk47	1.04655	0.0898359	0.0499527	0.828287	2.22774	A0A0G2JJD3;O95870;A0A0G2JI89;F2Z3H2;F2Z3G6	ABHD16A
1.13877	-1.6179	-0.748515	0.340127	0.354912	0.532602			0.428719	0.372633	0.322863	0.481247	1.00296	H0Y6K2;A0A140T9E9;A0A0G2JK44;P25440;A0A140T9V2;U3KQA6;A0A0G2JHL0;A0A140T9F7;H0Y799;A0A140T9X8;A0A0G2JHN8;A0A140T9I1;E9PIQ3;E9PKQ9	BRD2
-1.42517	-0.569127	1.31597	0.197983	0.856057	-0.375715			0.196499	0.636064	0.720736	0.0828635	0.511311	A0A0G2JNZ5;A0A0G2JLB3;P04062;A0A0G2JNZ0	GBA
-0.37226	-0.846968	1.44283	-0.421749	-0.866535	1.06468			0.0566054	0.877798	0.91844	-0.0183964	-0.163846	A0A0G2JNZ2;A0A0G2JPP5;A0A669KB89;Q14160;A0A0G2JMS7;H0YCG0;A0A669KAX5;Q5T0G3;H0YDF9	SCRIB
-1.05071	-0.879484	-0.798999	0.902338	0.93809	0.888762	+	oe_kk47	4.75108	1.77386e-05	0	4.89693	24.0469	A0A0G2JQ41;A0A1C7CYZ0;I3L4Y1;Q12979;B7Z683;I3L2P5;I3L1U8;I3NI05;A0A0G2JRJ1;I3L379;I3L3W0;P11274;A0A0G2JQT5;A0A0G2JQB5;I3L2C0;H0Y554	ABR
-2.01789	0.44189	0.152284	0.589676	0.33289	0.501146			0.536928	0.29045	0.224635	0.782902	1.21713	O43251;A0A0G2JRA5;B0QYV1;A0A0G2JRD1;S4R3K7;Q9NWB1;A0A0G2JSB3;F8VZG9;B7Z1U7;A0A6Q8PFM4;J3KNW3;A0A804HJM2;A0A087X2B1;A0A6Q8PH77;I3L1D4;B0QYY4;A0A6Q8PGE0;A0A6Q8PHA3;A0A804HKG7;F8VZY7;F8VR27;S4R469;B0QYY7;A0A286YEU2;J3QRF4;J3QQZ2;A0A3B3ITL7;F8VRS4;A6NFN3;B0QYY6	RBFOX2;RBFOX1
0.374984	0.820655	0.387248	-0.84238	0.865096	-1.6056			0.6391	0.229562	0.164737	-1.01967	-1.41656	A0A0J9YWJ4;K7EJD2;A0A0J9YWB6;Q9Y5B0;A0A0A0MR03	CTDP1
-1.754	-0.242518	0.0909015	1.28442	0.227806	0.393393			0.904116	0.124705	0.0754544	0.204958	1.93771	A0A0J9YXF2;Q15165;G3XAK4;A0A0J9YYJ1;A0A2Q2SAK4;A0A0J9YXM1;A0A0J9YXU7	PON2
1.04975	-1.78315	0.383534	0.176918	-0.425898	0.598849			0.0918307	0.809411	0.873586	0.0383504	0.257619	A0A0U1RQK7;A0A0A0MSA7;A0A804HJV5;O43432	EIF4G3
-0.956803	-0.730667	-1.0364	0.949554	0.907047	0.867265	+	oe_kk47	4.36238	4.3413e-05	0.000715232	2.35593	19.1946	H0YMA4;A0A0U1RQM0;Q15004;H0YKX3;A0A0U1RQC1	KIAA0101
0.302332	-1.55005	0.768589	1.10351	-0.813472	0.189085			0.130621	0.740251	0.820883	0.03641	0.355384	A0A0U1RQQ9;Q6P3W7;F8VSC5;F8VPW3;H0YIK6	SCYL2
0.0217024	-1.75774	-0.170425	0.139152	0.496487	1.27082			0.904942	0.124468	0.0754439	0.742572	1.93936	A0A0U1RQS5;B3KNS4;A0A0U1RQL9;A0A0U1RQV1;A0A0U1RQN3;Q96A10	hCG_2043597
0.432876	-0.0894426	-1.95882	0.694438	0.285342	0.635603			0.661879	0.217832	0.154269	0.539395	1.46092	A0A0U1RRH6;O94880;B4DG57	PHF14
1.26532	-0.572842	1.07647	-0.0248796	-1.31391	-0.430159			0.780272	0.165855	0.111247	-0.294371	-1.69225	F6XEV2;A0A0U1RRK1;A0A286YF11;Q9BPX6;E9PQV6;S4R3W3;S4R3D7;S4R3V1	MICU1
0.33372	-0.957742	-1.47488	0.525415	0.411192	1.1623	+	oe_kk47	1.12221	0.0754727	0.0420606	0.399997	2.38628	A0A0U1RRM1;Q8WXI9;A0A0U1RR30;A0A0U1RR34;A0A0U1RRK3	GATAD2B
-1.33872	1.23683	-0.594132	-0.495877	1.02541	0.166497			0.202747	0.626979	0.710436	0.115234	0.525563	A0A0U1RRM6;Q8N8S7;A0A075B6E5;A0A0U1RQP7	ENAH
0.855017	0.897116	0.933956	-0.956285	-1.16595	-0.563848	+	oe_kk47	3.26103	0.000548239	0.000868526	-4.29445	-10.0642	Q53Z42;A0A140T913;A0A140T955;A0A140T9I0;A0A140T9X5;A0A140T933;A0A1W2PRT9;A0A1W2PPQ2	HLA-A
0.50344	1.38594	0.526188	-1.31179	-0.882706	-0.221074	+	oe_kk47	1.69787	0.0200507	0.0125446	-0.24413	-3.74404	Q03518;A0A140T9T7;A0A2R8Y4Y0	TAP1
-0.0111654	-1.66121	-0.639079	0.586344	0.866159	0.858953	+	oe_kk47	1.46098	0.0345955	0.019428	1.48308	3.14755	A0A140TA86;Q5XKP0;K7EIR2;A0A140TA84	QIL1;C19orf70
1.36951	-0.901991	-0.879401	0.921048	0.274356	-0.783523			0.11008	0.776104	0.847866	0.0792885	0.304256	A0A182DWF2;D3YTF8;A0A182DWF3;Q9NNW7;A0A096LPK7;A0A096LPD9;E7EWK1;A0A0U1RQX0;A0A096LPH4;A0A096LNY7;A0A096LPB7;A0A096LP96	TXNRD2
-0.882028	-0.940575	-0.91526	0.933811	0.888973	0.915078	+	oe_kk47	6.94877	1.1252e-07	0	1.03941	85.434	A0A1B0GUC3;A0A1B0GV98;A0A1B0GTC5;A0A1B0GU26;A0A1B0GTC3;A0A1B0GVH5;Q9C0B1;A0A1B0GTY1;A0A1B0GTI3;A0A1B0GUY7;A0A1B0GTZ8	FTO
1.07776	1.06916	0.534691	-0.923673	-0.953497	-0.804437	+	oe_kk47	3.19015	0.000645431	0.00100377	-0.705324	-9.64839	P49419;A0A1B0GW77;A0A1B0GTG2;A0A1B0GW82;A0A1B0GUA1;A0A1B0GTY9;A0A1B0GTJ4;A0A1B0GV49;A0A0J9YWF7;A0A1B0GUY0;H0YHM6;F8WDY6;F8VVF2;A0A1B0GVU0;A0A1B0GW65;F8WD33;A0A0J9YWM6	ALDH7A1
-0.371022	-0.0148051	0.223173	-1.73384	1.01064	0.885853			0.0404743	0.911015	0.940893	0.0667483	0.118996	A0A1B0GV06;A0A1B0GTP7;A0A1B0GUE3;A0A1B0GUG1;A0A1B0GUW4;E7EMM4;A0A1B0GW68;A0A1B0GUA4;A0A1B0GTM3;A0A1B0GTZ5;A0A1B0GUH5;Q13510	ASAH1
-0.435036	-0.659565	-1.38872	0.356583	1.23442	0.892319	+	oe_kk47	1.89861	0.0126296	0.00887921	0.333845	4.30159	A0A1B0GTU4;P49023;F5GZ78;A0A1B0GU60;F5H836;A0A1B0GV30;REV__D6RBA6	PXN
1.30371	0.879069	0.283254	-0.307576	-0.971362	-1.1871	+	oe_kk47	1.84264	0.0143668	0.00971816	-0.29816	-4.14083	A0A3B3ITE1;A0A1B0GTW1;A0A2R8YDH4;Q9UDY2;A0A3B3IU51;A0A3B3ISZ5;A0A3B3IRI3;A0A3B3ISF1;A0A3B3IRV6;A0A3B3IS03;A0A3B3IT83;U3KQJ2;A0A3B3IU26;B1AN86	TJP2
0.663546	0.942162	1.00128	-0.74142	-0.497134	-1.36844	+	oe_kk47	2.46733	0.00340934	0.00265421	-4.02438	-6.21597	A0A1B0GTW6;A0A0C4DH22;Q9H4G0;X6RC15;Q4VXN5;H0Y482;Q4VXN6	EPB41L1
0.157878	-1.09342	1.20973	1.14437	-0.722682	-0.69587			0.0704158	0.850324	0.902343	-0.0274499	-0.201249	A0A6Q8PHL8;A0A1B0GUA3;Q96EK5;A0A6Q8PH45;A0A6Q8PGG2;A0A1B0GUH6;A0A0D9SFK7;A0A1B0GTE6;A0A1B0GW21;A0A1B0GTX3;A0A6Q8PH08;A0A1B0GU96;A0A6Q8PHE6;A0A1B0GTE2;A0A1B0GVY9	KIAA1279;KIF1BP
-0.278311	-0.570982	1.99517	-0.695436	-0.349179	-0.101263			0.388274	0.409003	0.37366	-0.20116	-0.921361	A0A1B0GV47;Q7Z4S6;H0YHT2;H0YI78;H0YIM7;H0YIM6;H0YHG9	KIF21A
0.915188	1.01218	0.795855	-1.03573	-0.780494	-0.90699	+	oe_kk47	4.32505	4.73097e-05	0.000670807	-0.984304	-18.7828	A0A1B0GVD5;A0A1B0GWE8;P07339;F8W787;A0A1B0GW44;A0A1B0GVP3;A0A1B0GV23;C9JH19;A0A1B0GU92;A0A1B0GU03;H7C469;F8WD96;A0A1B0GVF1	CTSD
1.40543	0.349706	0.7145	-0.369373	-0.892092	-1.20818	+	oe_kk47	1.85401	0.0139956	0.00962125	-0.298231	-4.17315	A0A1B0GVF3;P23786;A0A1B0GV75;A0A1B0GTB8;A0A1B0GWC0;A0A1B0GTM0;A0A1B0GUD9;A0A1B0GTL9;A0A1B0GUB8	CPT2
-0.695302	-1.11767	-0.897903	0.945864	0.94898	0.816034	+	oe_kk47	3.81438	0.000153327	0.000768212	0.835358	13.9459	A0A1C7CYX9;Q16555;E5RFU4	DPYSL2
0.515241	-1.3216	-0.208958	0.403327	1.44492	-0.832929			0.328488	0.469366	0.470701	0.198753	0.798379	Q969N2;A0A1W2PPR6;A0A1W2PPS0;A0A1W2PPC3;A0A1W2PNP0;A0A1W2PP57;A0A1W2PQN1;A0A1W2PRZ8;A0A1W2PQY1;A0A1W2PPQ7;A0A1W2PP53;A0A1W2PP13;A0A1W2PQ52;A0A1W2PSC5;A0A1W2PR92;A0A1W2PRH2;A0A1W2PPK4;H7C2Y2;A0A1W2PNW9;A0A1W2PPI8;A0A1W2PRH8;A0A1W2PRV7;A0A1W2PPU8;A0A1W2PRG1;A0A1W2PQ29;A0A1W2PR73;A0A1W2PR22;B7Z7C5;A0A1W2PP03;A0A1W2PR70;A0A1W2PNZ5;A0A1W2PNS2;A0A1W2PP98;A0A1W2PQL3;A0A1W2PP91	PIGT
-1.41279	-0.420044	-0.737824	0.755804	1.08787	0.726984	+	oe_kk47	2.25755	0.0055265	0.00391079	0.432927	5.44453	A0A1W2PNX8;Q9H3U1	UNC45A
0.34342	-1.18096	-1.35865	0.612755	0.713159	0.870281	+	oe_kk47	1.25996	0.0549591	0.0307838	0.938177	2.68472	O14653;A0A1W2PRP7;A0A1W2PPG5;A0A1W2PPP5;A0A1W2PR02;A0A1W2PPG1;A0A1W2PPW8;A0A1W2PRV0;A0A1W2PR23;A0A1W2PQM3;A0A1W2PS81;I3L1K7;E7EQ34;I3NI02;I3L4Z6;I3L0K1;A0A1W2PRC2;A0A1W2PRD0;A0A1W2PRL0;A0A1W2PS12;A0A1W2PRE6;A0A1W2PQ77;A0A1W2PPJ0;A0A1W2PQE0;A0A1W2PQ06;A0A1X7SBU8;A0A1W2PQ38;A0A1W2PNV3;A0A1W2PQP2	GOSR2
-1.22652	-0.741466	-0.723365	0.947343	0.918884	0.82512	+	oe_kk47	3.35238	0.000444242	0.000498925	1.33876	10.625	A0A1W2PPH1;P23368;A0A1W2PQT3;A0A1W2PQY8;A0A1W2PQH3;A0A1W2PR68;A0A1W2PQF8;A0A1W2PQ37;A0A1W2PRS2;A0A1W2PRY9;A0A1W2PQH4;A0A1W2PRH1;A0A1W2PPY2	ME2
-0.661422	0.157229	1.80424	-0.595708	0.230753	-0.935093			0.466708	0.341422	0.283392	-0.174835	-1.07871	A0A1W2PPX5;A0A1W2PQR6;A0A1W2PQB7;A0A1W2PS43;A0A1W2PRS1;Q14108;A0A1W2PRF6;A0A1W2PPU6;D6RDG0;A0A1W2PS70;A0A1W2PNX7;A0A1W2PSE4	SCARB2
-0.520145	-0.85987	-1.25359	1.14329	0.723218	0.767092	+	oe_kk47	2.66209	0.00217726	0.00203106	0.805419	7.01273	A0A1W2PPZ5;P23193;A0A1W2PRL9;E5RIS7;B7Z4S1;E5RJ93;E5RK46;A0A1W2PS15;E5RFI1;A0A1W2PPV7;A0A0A0MT58;Q15560;Q5JRI7	TCEA1
-1.66889	-0.698212	0.807317	0.300533	0.319509	0.939747			0.623336	0.238048	0.172186	0.530985	1.38586	F2Z2I2;Q5W015;Q5VX20;A0A1W2PR17;Q16875;H0Y483	PFKFB3
1.17748	0.813506	0.650369	-1.21032	-0.85688	-0.574149	+	oe_kk47	2.72827	0.00186952	0.00176382	-0.81485	-7.30297	A0A1W2PRB8;E9PM72;A0A1W2PRX4;A0A1W2PS27;Q9NVC6;A0A1W2PS69;A0A1W2PNW7;E9PKQ4;A0A1W2PPP8;A0A1W2PR99;A0A1W2PQ48;A0A1W2PPC8;A0A1W2PNF3
1.83607	-0.830837	0.239938	-0.652903	-0.669853	0.0775886			0.437719	0.36499	0.313511	-0.0974274	-1.02097	A0A1W2PRV5;E7EQZ4;Q16637;B4DP61;A0A0G2JRX5;A0A0G2JRY6;H0YBZ9;A0A0G2JQN8	SMN1;SMN2
-0.909043	-0.994579	-0.684098	0.329665	0.958179	1.29988	+	oe_kk47	2.34968	0.00447013	0.00339531	0.117637	5.77296	A0A1X7SBZ2;A0A5H1ZRQ2;Q92841;A0A0U1RQJ0	DDX17
0.115987	0.781636	1.51975	-0.628937	-1.08279	-0.705646	+	oe_kk47	1.70264	0.0198317	0.0124295	-0.733468	-3.7567	A0A286YEX4;P08651;A0A590UJ82;A0A590UK73;B1AKN6;B1AKN7;B1AKN5;A0A590UK09;B1AKN8;Q12857	NFIC
1.00983	0.963343	0.754372	-0.889802	-0.955894	-0.881848	+	oe_kk47	4.61139	2.44686e-05	0.000947368	-1.94342	-22.1779	A0A286YF22;O43175;A0A2C9F2M7;A0A286YFA2;A0A286YFL2;A0A286YFM8;A0A286YF78;A0A286YER3;A0A286YFC8;A0A286YFB2;A0A286YF34;A0A286YFF3;A0A286YFE1;A0A286YFK5	PHGDH
-1.16793	-0.695559	-0.833927	0.835832	1.04334	0.818246	+	oe_kk47	3.47146	0.000337707	0.000551069	2.28054	11.4002	Q9UK22;A0A286YF37;R4GNH2	FBXO2
-1.33944	-1.06875	0.272235	0.159755	1.06346	0.912744	+	oe_kk47	1.17191	0.0673116	0.0371185	0.229392	2.49241	A0A2C9F2P4;A0A286YFF7;P50897;Q5T0S4;A0A286YFE3;A0A286YFL8;E9PK48;E9PIA8;A0A286YFL6;E9PSE5	PPT1
-1.64616	0.876016	0.250211	1.12826	-0.271382	-0.336942			0.143488	0.718641	0.802385	0.105383	0.38674	Q7Z3U7;A0A286YFF8;F8VZV1	MON2
-0.171134	0.99207	0.356403	-1.88368	0.177425	0.528916			0.403544	0.394872	0.353508	-0.186412	-0.952299	A0A2Q3DQE3;H0Y6G2;Q13555;Q8WU40;Q5SWX3;A0A804CJ50;H7BXS4;E9PBE8;E7EQE4	CAMK2G
-1.18192	0.417407	-1.35021	0.453145	0.930841	0.730735	+	oe_kk47	1.14305	0.0719366	0.0399243	0.718793	2.43057	A0A2R8Y690;A0A2R8YG59;A0A2R8Y5R1;A0A2R8YEX0;A0A2R8Y362;A0A2R8YD49;Q9H1P3;A0A087WTV1;A0A2R8YG95;A0A2R8YFT0;E7ET92;A0A2R8YDU7;A0A2R8YG53	OSBPL2
-1.84413	-0.436979	0.66289	0.724517	0.29762	0.596081			0.6639	0.21682	0.153226	0.57179	1.46486	A0A2R8Y4M1;A0A5F9ZHK1;A0A2R8YGW2;A0A2R8Y615;Q9NZA1;Q96NY7	CLIC5;CLIC6
0.748541	0.815549	1.04675	-1.35774	-0.785134	-0.467963	+	oe_kk47	2.49289	0.00321448	0.00250955	-2.19822	-6.31586	P51532;A0A2R8Y4P4;A0A2R8Y7S2;Q9HBD4;A0A2R8YGG3;A0A2R8Y440;A0A2R8YG32;A0A2R8YF58;A0A2R8Y7F3;A0A2R8Y6V2;A0A2R8Y4C5;A0A2R8YF80;A0A2R8Y526;A0A2R8Y7Y7;A0A2R8Y6N0;A0A2R8YDA1;A0A2R8YGP5;A0A2R8Y523;A0A2R8Y5K3;K7EQF0;A0A2R8YFK5;A0A2R8YCY3;A0A2R8YFV8;K7EP28;A0A2R8Y4R6;A0A0U1RQE1;A0A0U1RR09;A0A0U1RRF8;A0A0A0MSS5;F6UH26;A0A0U1RRD6;B1ALG1;F6T8Q0;B1ALG2;A0A0U1RRF5;A0A2R8Y7R0	SMARCA4
-1.62324	-0.328292	-0.468076	0.788385	0.607985	1.02324	+	oe_kk47	1.70858	0.0195623	0.0123645	0.887961	3.77249	A0A2R8Y804;A0A2R8Y543;A0A2R8YCH5;A0A2R8Y5A3;P35222;A0A2R8Y750;B4DGU4;A0A2R8Y7Z0;A0A2R8Y5C3;A0A2R8Y5Z1;A0A2R8Y6G0;A0A2R8Y815;C9IZ65;A0A2R8YG06	CTNNB1
0.423436	0.432061	-2.04091	0.409196	0.390466	0.385751			0.407521	0.391272	0.348977	2.02009	0.960329	A0A2R8Y566;Q9P260;A0A075B785;A0A075B768	KIAA1468
0.792673	0.238069	0.116867	-1.97062	0.61066	0.21235			0.389104	0.408222	0.372698	-0.595865	-0.923048	A0A2R8Y595;A0A2R8YFL0;P49711	CTCF
-0.576681	-0.675729	-0.762601	0.691615	1.72829	-0.404897			1.02001	0.0954971	0.0534881	0.268073	2.17293	Q99700;A0A2R8Y7E6;A0A5F9ZHW5;H0YH87;A0A5F9ZHX3;A0A2R8Y7P6;A0A2R8YDM9;A0A5F9ZHH4;A0A2R8Y5A6;F8WB06;V9GY86;A0A5F9ZI57;F8VQP2;F8W0B5;A0A5F9ZH85;F8VRK6;F8WB05	ATXN2
-1.72132	-0.132958	-0.46759	0.733209	0.769662	0.819	+	oe_kk47	1.48184	0.0329731	0.0188879	0.861764	3.1977	A0A2R8Y5P7;P49590;A0A2R8Y6I1;A0A2R8Y3N3;D6RJE6;D6RB22;B4DQ67;A0A2R8Y5E8;A0A2R8Y4X6	HARS2
-0.456804	-1.3051	0.89524	1.08354	0.62947	-0.846343			0.266679	0.541154	0.590514	0.102448	0.667215	A0A2U3TZL3;A0A2R8Y7Q9;A0A2R8YEK8;A0A2R8Y5S9;Q9Y5P4;A0A2R8Y5H3;A0A2R8YE18;A0A2R8Y7C5;A0A2R8YE59;A0A2R8YFA1;A0A2R8YFI2;A0A2R8YEA4;A0A2R8YCI0;A0A2R8YDX6;H0Y9J1;A0A2R8Y773	COL4A3BP
-0.0315452	-1.02511	-1.39046	0.836522	0.710397	0.900194	+	oe_kk47	1.78538	0.0163915	0.0105046	1.47892	3.98071	A0A2R8Y653;Q9BZX2	UCK2
-0.106304	-1.10578	-0.602458	1.84366	0.027228	-0.0563418			0.819381	0.151572	0.098287	0.0617898	1.76925	A0A2R8Y6J3;P46777;Q5T7N0;A0A2R8Y4A2	RPL5
-1.22832	1.28427	0.872914	-0.121656	0.204385	-1.0116			0.291794	0.510747	0.538941	-0.0387764	-0.721094	A0A2R8YDQ9;A0A2R8Y6Y7;Q9P2R7;Q5T9Q5;A0A0U1RQL1;A0A0U1RRI1;Q5T9Q8;A0A0U1RQF8;A0A2R8Y5P6;A0A2R8Y6E6	SUCLA2
1.6555	0.357566	-1.15196	-0.562784	-0.619922	0.321596			0.264486	0.543894	0.595136	-0.0820382	-0.662467	P62263;A0A2R8Y811;E5RH77	RPS14
-1.51671	0.126597	-0.359689	1.35143	0.768596	-0.370224			0.764438	0.172013	0.115519	0.221966	1.66118	E7ETK0;A0A2R8Y849;A0A2R8YD14;P62847;A0A2R8Y8A0	RPS24
-0.878063	-0.723017	-1.11542	0.935156	0.912759	0.868585	+	oe_kk47	4.01089	9.75237e-05	0.000440816	5.57741	15.6432	A0A2R8Y851;P62273;A0A2R8Y6P7;A0A087WTT6	RPS29
-1.13046	-1.05901	-0.455805	0.926456	1.0287	0.690111	+	oe_kk47	2.76379	0.0017227	0.00180463	0.584447	7.46305	A0A2R8Y855;Q969G3;A0A2R8Y765;A0A2R8Y7U4;A0A2U3TZQ7;A0A2R8Y7I9;A0A2R8Y4T4;A0A2R8YES3;B4DGM3;J3QKS7;J3QR61;J3KT85;A0A2R8YD78;J3QKX6;A0A2R8YDQ4;J3QL66	SMARCE1
0.894413	0.646727	0.706481	-1.78036	-0.189961	-0.277303	+	oe_kk47	1.34358	0.0453336	0.0257163	-0.844294	-2.87296	A0A2R8Y880;Q7Z6E9;I3L3Y2;H3BUN0;H3BSK8	RBBP6
0.756708	0.991596	0.980583	-0.910444	-0.896729	-0.921715	+	oe_kk47	4.72362	1.88964e-05	0	-0.644656	-23.6677	P51659;A0A804HK65;A0A2R8YD50;E7EPL9;A0A804HKU2;E7ER27;E7ET17;A0A2R8Y7L2;A0A804HIR1;A0A2R8YDT8;A0A2R8YF45;A0A804HK88;A0A804HKB5;A0A804HIG8;A0A804HLJ0;A0A2R8Y7W2;A0A804HKT2;A0A2R8YEG2;A0A2R8YF39	HSD17B4
-1.32108	-0.614212	-0.719553	0.827008	0.965392	0.862446	+	oe_kk47	2.85726	0.00138912	0.0016662	0.804848	7.89943	P68400;E7EU96;A0A2R8YD58;A0A2R8Y5A0;Q8NEV1;A0A2R8YFU2;A0A2R8YF43;A0A2R8Y4D6;A0A2R8YDP2;A0A2R8Y4H0;V9GYA2;A0A2R8YEW1;A0A2R8YDY7;A0A2R8YCK2;A0A2R8Y7T1;A0A2R8YF47;V9GY80;A0A2R8YEL7;A0A2R8Y797;A0A2R8Y3W6;V9GYW6;A0A2R8YCC9	CSNK2A1;CSNK2A3
-1.91441	0.000892226	-0.0753312	0.62602	0.615142	0.74769			0.990685	0.102168	0.0589361	0.530984	2.1128	A0A2R8YDB8;H7BXF5;Q9H0E3	SAP130
-1.4239	0.483136	-0.867657	0.891262	-0.162436	1.0796			0.814009	0.153459	0.100066	0.165188	1.75865	A0A2R8YDQ0;Q9H267;F5H008;G3V3F9	VPS33B
-0.523574	-0.817677	0.730988	1.50907	0.199324	-1.09813			0.173098	0.671277	0.757935	0.07444	0.457168	A0A2R8YE10;Q9NRW7;A0A2R8YD95;A0A087WU65;A0A2R8YF01;A0A1B0GXI6;B7Z7G7;A0A2R8YEX8;A0A2R8Y7W9	VPS45
-1.71516	-0.668217	0.418103	0.698852	0.362467	0.903952			0.965162	0.108352	0.0637423	0.227503	2.06081	A0A2U3TZM1;A0A2R8YE77;O14936;A0A2U3TZN6;A0A2U3TZM4;A0A7I2RJN6;A0A2R8YEK3;A0A2R8YFN5;Q5JS79;A0A2R8Y6F8;A0A2R8YEJ7;A0A2R8Y3B3;Q5JS72;A0A2R8Y6D8;A0A2R8YGH2;A0A2R8Y4K4	CASK
0.774987	0.679215	1.08683	-0.413338	-0.662311	-1.46539	+	oe_kk47	2.11806	0.00761974	0.00562145	-1.51927	-4.97586	A0A2R8YEM2;P51946;D6RHI7;D6RG18	CCNH
-0.985066	-1.48319	1.07728	0.568101	0.47459	0.348285			0.517633	0.303646	0.238254	0.461949	1.17926	A0A2R8YF49;Q12774;A0A2R8YFR7;A0A5F9ZH52;H0Y895;A0A5F9ZGZ6;A5YM69;C9J591	ARHGEF5
0.817136	-1.30854	-1.15709	0.751441	0.844847	0.0522039			0.685845	0.206137	0.143386	0.949924	1.50762	H3BMM5;A0A2R8YF87;Q96AX1;F5H6Y0;A0A2R8Y5U3;F5H7N5;F5H2X5	VPS33A
-1.14124	-0.933513	-0.619688	0.83117	1.01932	0.843956	+	oe_kk47	3.41103	0.000388124	0.000527273	1.31062	11.0004	A0A2R8YFA9;O94851;E9PNC3;E9PKI3;E9PKW5;E9PJB0;E9PRE0;E9PL42;Q6ZW33	MICAL2
-1.44311	-0.613764	0.553435	0.657664	-0.426884	1.27266			0.586272	0.259256	0.19333	0.0720272	1.31361	A0A2R8YFH5;Q15437;Q5QPE2;Q5QPE1;A0A2R8Y633;A0A2R8Y7S7;A0A2R8YF30	SEC23B
-1.66484	0.675977	1.31197	-0.0102117	-0.133506	-0.179394			0.0841541	0.823846	0.884223	-0.058279	-0.237627	B1ALK7;A0A2R8YG42;E7EUY6;Q14155;E9PDQ5;F6SJA5;E7EU80;C9JAD7;C9JDI6;B1ANY6;E7ENL8	ARHGEF7
-1.33047	0.703895	-0.174118	-0.197616	1.54	-0.541691			0.241134	0.573939	0.640539	0.142206	0.611459	A0A2R8YGD1;A0A804HJ17;O14773;A0A2R8Y7U1;A0A2R8YD45;A0A2R8Y7I4;A0A2R8YD72;A0A2R8YDY1	TPP1
-0.834609	-1.0467	-0.748239	1.08725	1.14299	0.399295	+	oe_kk47	2.62937	0.00234763	0.0019883	0.68797	6.87301	A0A2R8YGH5;P61966;H7C1E4;F6SFB5;A0A5F9ZI43;H7BZG6;H0Y673;A0A5F9ZHX2;A6NH01;A0A5F9ZHW1	AP1S1
0.402208	1.53277	0.542804	-0.512076	-0.984901	-0.9808	+	oe_kk47	1.88025	0.013175	0.00923586	-0.460959	-4.24839	A0A2U3TZH3;Q05639;A0A2R8Y488;A0A2R8Y660;A0A2R8YDN5;A0A6Q8PFK6	EEF1A2
0.440974	1.32475	0.357479	0.263324	-1.13995	-1.24657	+	oe_kk47	1.15446	0.0700713	0.0388859	-0.181075	-2.45494	E9PNW4;A0A2U3TZL5;P13987;H0YET2	CD59
-1.56428	-0.822748	0.0664293	0.566606	0.798292	0.955706	+	oe_kk47	1.47928	0.0331681	0.0188571	0.209256	3.19151	A0A2U3TZT9;Q8WTS1;A0A2R8YEZ7;C9J1D1;H7BZY9;F8W7B5;A0A2R8YG27;A0A2R8Y7S6	ABHD5
0.467022	0.729861	1.37148	-1.19103	-0.712594	-0.664749	+	oe_kk47	2.24592	0.00567649	0.00414841	-0.40505	-5.40414	A0A2U3TZU2;P06744;K7EQ48;A0A2R8Y6C7;A0A0J9YYH3;A0A0J9YXP8;A0A0J9YX90;K7ERC6;K7EPY4;K7EP41;K7ENA0;K7ELR7;A0A2R8YF08;K7ERK8;A0A0J9YXM3;K7EIL4;A0A0J9YXH9;A0A0J9YYI8;Q8N196	GPI
-0.834624	-0.822973	-1.06897	0.88483	0.968243	0.873497	+	oe_kk47	4.53814	2.89641e-05	0.000885246	2.08265	21.2558	A0A384DVU0;Q8IY17;M0R2C2;M0QYT1;M0R2K2;M0QYF5;M0QZK5;M0R2H4;A0A2R8Y7E1	PNPLA6
-1.17301	-0.836915	-0.694141	0.847097	0.933865	0.923102	+	oe_kk47	3.62393	0.000237722	0.000648045	0.980501	12.4716	A0A3B3IRI2;P17812;B4E1E0;A0A3B3IRQ8;A0A3B3ITF6;A0A3B3ITB8;A0A3B3ISY3;A0A3B3ITH9	CTPS1
0.0214102	0.674374	1.62434	-0.961388	-0.507709	-0.851027	+	oe_kk47	1.47831	0.0332422	0.0188163	-0.614171	-3.18917	A0A3B3IRR1;A0A3F2YNY7;P08397;F5H345;F5H0P4;A0A3B3IU56;F5GY90;A0A1W2PNU5;A0A3B3IU34;F5H226;F5H4W5;F5H4X2	HMBS
0.643752	0.857239	1.14081	-0.613878	-0.772944	-1.25498	+	oe_kk47	2.73229	0.00185229	0.00176826	-0.665166	-7.32093	A0A3B3IRT8;P43307;C9J3L8;C9J5W0;E9PAL7;C9IZQ1;C9JBX5	SSR1
-1.02227	-0.485859	-1.14221	0.986399	1.00071	0.663231	+	oe_kk47	2.81196	0.00154184	0.00189986	1.96765	7.68516	C9JIR6;A0A3B3IS24;O75688;B8ZZF0	PPM1B
-0.965185	-0.987592	-0.767912	1.06179	0.83264	0.82626	+	oe_kk47	4.19306	6.41121e-05	0.000553846	2.8945	17.3951	P06400;A0A3B3IS71;A0A2R8YFL6	RB1
-1.04324	-0.331113	-1.15656	1.23237	0.875698	0.422852	+	oe_kk47	2.07523	0.0084095	0.00629881	1.04015	4.83846	B4DKB2;A0A3B3ISF9;P42892	ECE1
-1.47444	-0.550806	-0.527474	0.957048	0.964249	0.631423	+	oe_kk47	2.17038	0.00675492	0.00505281	0.379516	5.14777	A0A7I2V2P6;A0A3B3ISG5;P14735;A0A7I2V3E3;A0A7I2YQV5;A0A7I2V610;A0A7I2V4Q3;A0A7I2V2S1;A0A7I2V3K9;B3KSB8;A0A7I2YQS6;A0A7I2V612;A0A7I2V373;A0A7I2V4A4;A0A7I2V634	IDE
-1.09074	0.746192	1.62531	-0.568518	-0.223856	-0.488391			0.45638	0.349639	0.294374	-0.327168	-1.05819	Q86U38;A0A3B3ISH6;H0YJP7	NOP9
-0.461348	-1.32934	-0.837962	0.972415	0.809827	0.846412	+	oe_kk47	2.62236	0.00238583	0.00198366	1.93196	6.84338	H3BSW0;A0A3B3ISV5;Q8N9N7	LRRC57
1.65331	-1.0863	-0.789828	-0.0810658	0.604677	-0.300795			0.0563927	0.878228	0.918506	0.0161114	0.163263	A0A3B3ITS5;Q14181;H0YDR7;E9PIQ6	POLA2
1.88516	0.144269	-0.510799	-0.026726	-0.905404	-0.586499			0.596073	0.25347	0.187259	-0.266084	-1.33272	A0A3B3ITT5;P47914	RPL29
1.76144	-0.212815	0.0592631	-0.393358	0.0842031	-1.29873			0.656561	0.220515	0.157375	-0.139199	-1.45057	A0A3B3ITW3;P28288	ABCD3
1.63934	-0.80313	0.756864	-0.762961	-0.704941	-0.125168			0.646161	0.22586	0.161448	-0.170448	-1.43031	E9PN17;A0A3B3ITX4;O75964;A0A3B3IRW3	ATP5L
1.36838	0.498163	0.701008	-0.798014	-1.18933	-0.580209	+	oe_kk47	2.24179	0.00573073	0.0041338	-0.43143	-5.38988	A0A3B3ITZ9;Q9Y2W1	THRAP3
0.766005	0.908163	1.04344	-0.970348	-0.747747	-0.999509	+	oe_kk47	4.05526	8.80522e-05	0.000475771	-5.88184	-16.0534	A0A3B3IU04;A0A3F2YNW8;Q14643;A0A3B3ITU8;A0A3B3ITQ1;A0A3B3IU05;A0A3B3IU13;A0A3B3IRP0;A0A3B3ITM6;B7ZMI3;A0A3B3IRT5;A0A3B3ITM1;A0A3B3ITQ4;A0A3B3ISR4;A0A3B3IS59	ITPR1
-0.423091	-1.41637	-0.56224	0.31367	1.37601	0.712022	+	oe_kk47	1.66213	0.0217706	0.0134512	0.456587	3.65004	A0A3B3IU46;Q9BTL3	FAM103A1
-1.65712	-0.145714	-0.409257	1.17815	0.784067	0.249877	+	oe_kk47	1.2849	0.051892	0.0293641	0.387326	2.74026	Q13144;A0A3B3IUB1;A0A3B3ITG6;A0A3B3ISX3;A0A3B3ISM8;A0A3B3IUF2;A0A3B3ITQ2;A0A3B3ISV1;A0A3B3IRP4;A0A3B3IS56;A0A3B3ISS1;A0A3B3ISI2;A0A3B3IST9;A0A3B3ITK8;C9JRD9;A0A3B3IT53;H7C2X0	EIF2B5
-0.935467	-0.792329	-0.991902	0.907297	1.06057	0.751832	+	oe_kk47	4.14638	7.13871e-05	0.000524272	0.70133	16.9287	A0A3B3IUB5;Q8TCT9;A0A075B6F6;A0A0S2Z6F0;A0A3B3IT72;A0A0C4DGU3	HM13
-0.487832	0.255307	-1.72615	0.669766	1.11244	0.176465			0.958166	0.110112	0.0648969	0.572776	2.04662	A0A3B3IUB9;Q9NR09;H7C094;H7C3P0	BIRC6
0.371497	1.15122	0.774804	0.117454	-1.15046	-1.26452	+	oe_kk47	1.43388	0.0368231	0.020538	-0.198073	-3.08303	Q14690;A0A3B3IUD7;S4R3Q4	PDCD11
-0.714856	-0.958879	-1.01097	0.584356	1.03873	1.06162	+	oe_kk47	3.23855	0.000577364	0.0010411	1.73454	9.93055	A0A494BZT8;Q9Y6A5;A0A087WUE2;C9JA91;E7EMT0	TACC3
1.43733	0.307363	0.711631	-0.355465	-1.05345	-1.04741	+	oe_kk47	1.81278	0.0153893	0.0102007	-0.227524	-4.05678	H0Y993;A0A494C028;P35659;B4DFG0;H0Y8X0;D6RDA2;A0A494C198;D6R9L5	DEK
-1.49646	-0.332291	-0.705703	0.784217	0.927654	0.822581	+	oe_kk47	2.08995	0.00812924	0.00634395	1.27268	4.88536	Q9UHD2;A0A494C045;A0A7I2V646;A0A494C148;A0A7I2V4W4;A0A494C1M6;A0A494C0A8;A0A7I2V463;A0A494C079;A0A7I2V643;A0A494C167;A0A494C0X2;A0A7I2V2F4;A0A494C0R4;A0A7I2V4Z2;A0A494C1I2;A0A7I2YQG1;A0A7I2V387;F5H1A3;F5H206;A0A7I2V5Y4;A0A7I2V615;A0A7I2V3S9;A0A7I2V2N0;A0A7I2V322;A0A7I2V4Y1;A0A7I2V3E0;A0A7I2V476;A0A7I2V636	TBK1
-0.12181	-1.39073	-0.933827	0.597742	0.686642	1.16199	+	oe_kk47	1.78322	0.0164733	0.0104909	1.46239	3.97473	A0A494C050;Q8N5F7	NKAP
0.57153	1.11447	0.959539	-1.22584	-0.718457	-0.701234	+	oe_kk47	2.76623	0.00171305	0.00182101	-1.95708	-7.47417	A0A494C066;B7Z4W5;Q16773;Q5T277;Q5T276;Q5T278	CCBL1
-1.53227	-0.904238	0.166367	0.944826	0.796639	0.528675	+	oe_kk47	1.3831	0.0413904	0.0236626	0.960934	2.96398	A0A494C0G1;H0Y987;O95394;A0A087WT27;A0A494C1Q4;J3KN95;A0A494C1E2;A0A494C163;A0A494C099;D6RCQ8;D6RF77;D6RCD1;D6RC77;H0Y8I3;A0A494C076;D6RIS6	PGM3
-0.509366	-0.845952	-1.2511	1.05879	1.03937	0.508265	+	oe_kk47	2.46361	0.00343867	0.00264323	0.238741	6.20151	A0A494C0R8;I3L2B0;K7EIG1;I3L4B5;I3L318	CLUH
1.11175	1.24053	-0.936984	-1.11955	-0.306015	0.0102687			0.531918	0.29382	0.228419	-0.150778	-1.20731	A0A494C0W0;O95453;A0A494C1K5;A0A494C0Q2;A0A494C1N1;A0A494C0K5;A0A494BZU6;A0A494BZW7;A0A494C0P9;A0A494C1G3;A0A494C156;A0A494C0Q6;H3BRK1;A0A494C002;F5H1Z4	PARN
1.48031	0.133638	-1.1172	-0.9519	0.743805	-0.288653			0.13614	0.730903	0.812698	-0.0487665	-0.368893	A0A494C108;Q8N9T8;F8WFC1;H0YFD2	KRI1
-1.19234	-1.00166	0.0084719	1.33834	-0.0373232	0.884523	+	oe_kk47	1.24366	0.0570611	0.031789	0.278663	2.64868	A0A494C146;P50336;A0A494C0D4;H0YFP3;A0A1W2PQM0;H0YFE1;F5GZT7;A0A494C0M9;A0A494C134;F5H825;D3DVG2;A0A1W2PRF9;A0A1W2PPA5	PPOX
-0.624503	-0.815086	-1.19933	0.686457	0.721304	1.23116	+	oe_kk47	2.70691	0.00196377	0.00185378	0.368705	7.20815	A0A494C1F2;P35658;A0A0A0MSW3;A0A494BZU9;H0Y837;H0YF36;B7ZAV2;E9PKD2;A0A494C0J0;H0YDS4;A0A494C104;A0A494C0Y1	NUP214
-0.343794	-0.807914	-1.28353	1.2054	0.183426	1.04641	+	oe_kk47	1.75136	0.0177272	0.0111049	0.988564	3.88757	A0A494C1J1;Q69YQ0;C9J8U1;F8WAN1;C9JLY8	SPECC1L;SPECC1L-ADORA2A
-0.522903	-1.46775	-0.55109	1.0747	0.870463	0.596574	+	oe_kk47	2.12113	0.00756606	0.005557	0.485019	4.98582	A0A494C1L5;P50851;E9PEM5;A0A494BZW2;H0YAC6;A0A494C0R9;A0A3B3IS13;H0Y9N9;A0A3B3ISK3;Q5T321;Q8NFP9;H0YA17;A0A0D9SF28	LRBA
-1.60755	-0.714784	0.680205	0.120044	0.394019	1.12806			0.681176	0.208365	0.14588	0.142108	1.49852	P26885;A0A494C1N0;F5H0N4	FKBP2
-1.16828	-0.922449	-0.593022	0.880833	1.02679	0.776131	+	oe_kk47	3.22333	0.000597957	0.00102703	1.48492	9.84102	Q86WJ1;A0A494C1P7;A0A494C1F7;A0A0A0MSH9;A0A087WTM4;A0A494C0J6;A0A0A0MRH8;A0A494C1H0;A0A494C0F0;A0A494C111;A0A494C0M4;A0A494C1I3;A0A494C0B8;A0A494C0Q0;A0A494C179;A0A494C1S1;A0A087WWW4;A0A494C1H1;A0A1W2PP16;A0A087WZM7;A0A494C1F3	CHD1L
1.06818	0.724528	0.892576	-0.759885	-1.19332	-0.732076	+	oe_kk47	3.2478	0.000565197	0.00104931	-0.760628	-9.98536	A0A499FI31;Q15020;A0A494C0L2;F8W667;F8VVK9;F8VZM2	SART3
-0.255822	-0.617708	-1.55764	0.801137	1.09469	0.535336	+	oe_kk47	1.74	0.018197	0.011417	1.10813	3.85677	A0A499FJK2;P01137;A0A7I2YQL8;A0A7I2V5Z9	TGFB1
-0.807809	-0.031814	-1.52163	0.743022	0.517842	1.10038	+	oe_kk47	1.56587	0.0271725	0.0158713	1.55167	3.40418	A0A4W8VX11;A0A5H1ZRS1;Q15154;E5RGQ4;E9PGW9;E7EV93;H0YBA1	PCM1
-1.75007	-0.392711	-0.00832777	0.771871	1.03316	0.346072	+	oe_kk47	1.19317	0.0640959	0.0350829	0.656466	2.5383	U3KPX3;A0A590UJ43;P48729;A0A5F9W493;D6REM4;E7ETM0;H0Y9X2;U3KQK7;Q8N752;A0A590UK94;A0A590UJQ7;E5RG27;D6RGE5;U3KQ83	CSNK1A1;CSNK1A1L
-1.45307	-0.979207	0.114095	0.829325	0.98999	0.498866	+	oe_kk47	1.47439	0.0335436	0.0190513	1.21468	3.17974	A0A590UJ73;A0A590UJW4;E7EQB3;Q9BSV6;B0V3J0;A0A0G2JNL0;A0A0G2JNK5	TSEN34
0.665665	-0.779172	1.06115	-0.316385	-1.43911	0.807851			0.29958	0.501672	0.523022	-0.103374	-0.737626	A0A590UJK4;A0A590UK01;A0A590UJP7;A0A590UK80;Q13247;A0A0D9SGD2	SRSF6
-0.0631484	0.276627	1.65806	-0.0257861	-0.440041	-1.40571			0.871295	0.134495	0.0839165	-0.494272	-1.87216	A0A590UJS4;Q6KC79	NIPBL
-0.284243	1.25447	1.25315	-0.450148	-0.874296	-0.898938	+	oe_kk47	1.30309	0.0497634	0.0281435	-0.213404	-2.78109	A0A590UJS8;A0A5F9ZA98;O75027;B4DGL8;A0A087WW65;A0A2R8Y473;E9PNQ5;A0A2R8Y3N2;E9PJR8	ABCB7
-1.37987	-0.706069	-0.537389	0.776042	0.914005	0.933277	+	oe_kk47	2.58153	0.00262102	0.00220862	1.28274	6.67308	A0A590UJW8;Q96J02;A0A590UK44;A0A590UJQ1;A0A590UK95;A0A1W2PR79;A0A590UIY0;H0YBS9;Q9H0M0	ITCH
0.625238	1.14271	0.848196	-1.10204	-1.09106	-0.423049	+	oe_kk47	2.52943	0.00295509	0.00221739	-0.808472	-6.46108	A0A5F9UK94;H0Y360;Q01433;H0YF16;A0A804H2H4;A0A804CCZ3;A0A590UK85;A0A7P0Z4H6;A0A590UJX5;A0A7P0TB79;E9PIJ1;E9PJF6;A0A7P0T999	AMPD2
-1.04897	-0.521093	-1.10244	0.750849	0.925027	0.996636	+	oe_kk47	3.06206	0.000866842	0.00146309	2.73736	8.93719	A0A5F9UP49;Q9BRK5;A0A5F9UJX7;H0Y3T6;G3V1E2	SDF4
-0.666319	-1.36262	-0.591555	1.04485	0.878094	0.697552	+	oe_kk47	2.56064	0.00275017	0.00218141	1.54581	6.58738	A0A5H1ZRP2;A0A5F9UY30;O43493	TGOLN2
0.840436	-1.62141	-0.197374	0.869755	0.711322	-0.602727			0.312532	0.486932	0.497788	0.220598	0.764965	A0A5F9YFS9;C9JBL1;Q9Y6A9	SPCS1
0.022962	-0.0620813	1.63914	-0.946295	-1.10136	0.447625			0.651024	0.223345	0.15954	-0.124976	-1.43978	A0A5F9ZHB6;P49642;A0A3B3ITS8;F8VNY2;F8VSB2	PRIM1
1.02063	1.13177	0.497191	-1.12781	-0.747325	-0.774454	+	oe_kk47	2.80466	0.00156798	0.0018871	-0.380759	-7.65114	A0A5F9ZHM4;P07195;A0A3B3IS95;A8MW50;C9J7H8;F5H793	LDHB
-0.551787	-0.652714	-1.31579	1.34022	0.741207	0.438869	+	oe_kk47	2.03249	0.00927919	0.00699617	1.28443	4.70424	A0A5F9ZHN7;Q9NTJ5;E9PGZ4;C9JV50;F8WDN7;F8WCQ2;C9J3E3	SACM1L
0.130036	0.303872	-2.0137	0.555686	0.54792	0.476188			0.636969	0.230691	0.16581	0.818405	1.41241	A0A5F9ZHN8;P23458;A0A5F9ZI39;A0A5F9ZH07;A0A5F9ZHW0;A0A5F9ZH32;A0A5F9ZH73;A0A5F9ZHK2;A0A5F9ZHI1;A0A5F9ZI01	JAK1
-0.98381	-0.880864	-0.871541	0.916364	0.888003	0.931848	+	oe_kk47	5.93945	1.14961e-06	0	2.42686	47.762	P51648;A0A5F9ZHN9;A0A5F9ZGX4;A0A5F9ZHI5;J3QRD1;A0A5F9ZI12;A0A5K1VW72;I3L1M4;A0A5F9ZHZ9;A0A5F9ZHP6;J3QS00;J3KTG1;I3L0X1;J3QKK9;I3L2W1;K7EN73;A0A0D9SGC3;J3KTD9;E9PJV0;C9JKT2;C9JMC5;I3L3I9;A8MYB8;E9PNN6;P48448;P30838	ALDH3A2
-1.10629	-0.992908	-0.489732	1.24866	0.454378	0.885895	+	oe_kk47	2.35662	0.00439926	0.00331256	0.558908	5.79833	A0A5F9ZHU7;P49643;A0A5F9ZHR0;A0A096LP51	PRIM2
-0.756243	-0.467945	-1.22409	1.4143	0.220407	0.813578	+	oe_kk47	1.78881	0.0162626	0.010472	0.825503	3.99016	V9GYM8;A0A5F9ZI21;Q92974;V9GZ14;Q5VY93;V9GYF5;V9GYG5;V9GYF0	ARHGEF2
1.13887	0.880083	0.436382	-1.4195	-0.21251	-0.82333	+	oe_kk47	1.80978	0.015496	0.0103793	-0.635132	-4.04842	A0A5F9ZI63;O75530;E9PJK2;H0YEL4;E9PMU3	EED
1.16084	0.188057	0.21164	0.346198	-0.0493072	-1.85742			0.623837	0.237773	0.171972	-0.273968	-1.38683	A0A5H1ZRP4;Q8WX92	NELFB
-0.38601	-0.368394	-1.6513	0.850056	0.610664	0.944983	+	oe_kk47	1.67228	0.0212677	0.0131564	1.18674	3.67658	H0YH69;A0A5K1VW28;Q9HBU6;A0A5F9ZI33	ETNK1
1.08787	0.53635	0.552483	-1.71626	-0.523531	0.0630882	+	oe_kk47	1.23041	0.0588288	0.0325679	-2.42816	-2.61952	M0QXA7;A0A669KBH9;A0A669KAV7;B9EGQ5;A0A669KBG4;A0A2R8YFV2;O95785	WIZ
-2.02912	0.316533	0.465721	0.59116	0.303819	0.351883			0.438596	0.364254	0.312711	0.768524	1.02273	H0Y818;A0A669KAW3;P40692;A0A669KB03;A0A669KBB4;A0A669KBK2;A0A087WX20;H0Y5L7;E7EUC9;F2Z298;E9PF25;H0Y806	MLH1
1.1897	0.557202	-1.6964	0.368216	-0.503589	0.0848705			0.0121812	0.972341	0.981991	-0.00554593	-0.0368885	Q13620;A0A7P0T954;K4DI93;A0A669KAX4;A0A7P0T9L3;A0A7P0T8P8;A0A7P0TAQ3;A0A7P0T9C8;A0A804CL36;A0A7P0T9D0;A0A669KBG9;A0A7P0T9P5;A0A7P0TAF9;A0A7P0T9R8;A0A7P0Z4G9;A0A7P0T8W4;A0A7P0Z439;A0A7P0Z4E4	CUL4B
-0.00266067	1.54531	-0.700614	-1.40021	0.230066	0.328107			0.257013	0.553334	0.610223	-0.0849101	-0.646238	Q5T653;A0A669KAX9;C9IY40	MRPL2
1.7182	-0.512557	0.483863	0.0445149	-0.716109	-1.01791			0.716663	0.192016	0.131679	-0.117394	-1.56773	Q92538;A0A7I2V452;A0A7I2V2L5;A0A7I2YQM2;A0A7I2YQ65;A0A7P0RGV0;A0A669KB10;A0A669KBG8;A0A7I2V529;A0A7I2V514;A0A7I2V4K2;A0A7I2V3Y5;A0A7I2V2L4;A0A7I2V3Q4;A0A7I2V342;A0A7I2V4M6;A0A7I2V329;A0A7I2V2I0;A0A7I2V5C9;A0A7I2V4H1;A0A7I2V4F9;A0A7I2V3S0;A0A7I2YQN3;A0A7I2YQP6;A0A7I2V3J0;A0A7I2V3E5;A0A7I2V3H2;A0A7I2YQM0;A0A7I2V2U1;A0A7I2V2F8;A0A7I2V4L8;A0A7I2V3Y7;A0A7I2V2L1;A0A7I2V622;A0A7I2YQJ5;A0A7I2YQB8;A0A7I2V…	GBF1
1.72415	-0.810765	0.295457	-1.03526	-0.399713	0.226126			0.4192	0.38089	0.335321	-0.0654036	-0.98385	A0A669KB56;A0A669KBA4;A0A669KB53;P42224;A0A669KB68;A0A669KBI6;J3KPM9;A0A669KB52;A0A669KB75;E7EPD2;A0A669KB17;D2KFR9;E7ENM1;E9PH66;Q67C41;A0A669KBK4	STAT1
-1.91253	0.557979	0.649278	0.384476	0.613194	-0.292398			0.206038	0.622246	0.70606	0.0617358	0.533037	A0A6I8PIV1;Q9P2J5;A0A6I8PRS0;B4DER1;A0A6I8PIT3;A0A6I8PL42;A0A6I8PLB8;A0A6I8PS05;A0A6I8PLB3;A0A6I8PIP7;A0A6I8PTV8;A0A6I8PRU9;A0A6I8PRP1	LARS
-0.673427	-1.1093	-0.927614	0.855579	0.886186	0.968576	+	oe_kk47	3.79777	0.000159305	0.0007557	2.81821	13.8109	A0A6I8PIX7;O95425;A0A0J9YWY6;A0A6I8PL75	SVIL
-1.05926	-0.283238	-1.22507	0.613521	0.901541	1.0525	+	oe_kk47	2.24188	0.00572954	0.00413744	1.58975	5.3902	A0A6I8PS19;A0A6I8PL80;Q9NVN8	GNL3L
-0.992642	0.448558	-0.742076	1.42274	0.715688	-0.852272			0.459254	0.347333	0.291158	0.145147	1.06391	Q5TA58;A0A6I8PTZ8;Q9UL18;Q9H9G7	AGO1;AGO3
-0.241159	0.880908	0.974537	-0.346816	0.436919	-1.70439			0.661098	0.218224	0.154585	-0.12321	-1.4594	Q99615;A0A6I8PU73;A0A6I8PUD4;A0A6I8PS32;A0A6I8PIK4;A0A6I8PRZ0;A0A6I8PR89;K7ER44;A0A6I8PU89;A0A6I8PLE7;A0A6I8PUC2;K7EK03;K7EIH8;K7EPP7;K7ESP1;K7ELJ8;K7EJV7;K7EN19;K7EJL5;K7EJE9;A0A6I8PR93;K7ENB7	DNAJC7
0.797327	-1.68226	-0.736512	0.310972	0.520269	0.790207			0.666211	0.21567	0.152225	0.234867	1.46936	I3L1H5;A0A6Q8JGF9;Q9BZG8;I3L3X9;A0A0A0MTR4;U3KQN3	DPH1
0.845714	0.168916	0.885449	-1.20362	-1.29189	0.595431			0.898683	0.126275	0.0769605	-0.245649	-1.92683	A0A6Q8KRG2;Q08379;A0A1W2PQY5;A0A087WYC0;B7ZC06;H0Y7B8	GOLGA2
1.32396	1.07265	-0.963199	-0.26536	-0.127837	-1.04021			0.542748	0.286584	0.220206	-0.257848	-1.22854	Q9BYV8;A0A6Q8PFB5;A0A6Q8PEV5;A0A7I2PK71;A0A6Q8PFB1;A0A7I2SYM4;A0A6Q8PH03;A0A6Q8PGR4;A0A6Q8PG60;A0A6Q8PF12;A0A6Q8PH93;C9J6R3;F8WAV3;A0A6Q8PGX0;C9JCX6;A0A6Q8PHU1;A0A6Q8PH12;A0A6Q8PFZ2	CEP41
0.460221	0.856761	1.29081	-1.0503	-0.968416	-0.589078	+	oe_kk47	2.47259	0.00336829	0.0026625	-0.576756	-6.23639	O95163;A0A6Q8PHF4;A0A6Q8PG86;A0A6Q8PEX6;A0A6Q8PFB7;A0A6Q8PHC9;A0A6Q8PFH9;A0A6Q8PGW3;A0A6Q8PHI5;A0A6Q8PH48;A0A6Q8PF66;F5H2T0;A0A6Q8PFN8;A0A6Q8PHA0;A0A6Q8PGR0;A0A6Q8PF69;A0A6Q8PGA6;A0A6Q8PFC8;A0A6Q8PGC4;A0A6Q8PH36;H0YDF3;A0A6Q8PFX1	IKBKAP
-1.48705	-0.580361	-0.496206	0.84987	0.770616	0.943135	+	oe_kk47	2.22228	0.00599404	0.00437121	0.855485	5.32286	Q9NXR1;I3L522;A0A6Q8PEY3;A0A6Q8PGV6;I3L3G9;I3L2R9;A0A0J9YY14;A0A6Q8PG46;A6NIZ0;I3L2S8;A0A0J9YYF5;A0A6Q8PHH1;I3L533;I3L2T8;I3L2R3;Q9GZM8;J3QSD2;J3QL85;J3QRZ1;J3KRK9	NDE1
-1.07457	0.764485	1.12735	-0.630755	0.794068	-0.980586			0.247453	0.565649	0.628304	-0.120842	-0.625347	B4DHE8;A0A6Q8PF05;Q96DH6;J3KTC1;B4DM51;A0A6Q8PHT3;J3QKT5;A0A6Q8PFU8;A0A6Q8PGD8;A0A6Q8PHP1;H0YHB7;O43347	MSI2
0.00558401	-0.465908	1.07566	1.16144	-1.47934	-0.297441			0.174809	0.668638	0.755768	-0.067819	-0.461171	A0A6Q8PF35;F8VUA2;F5H875;Q9HD42;A0A6Q8PGM8;F8VVT7;A0A6Q8PG85;A0A6Q8PFF9;A0A6Q8PFX8;A0A6Q8PHU0;A0A6Q8PGI9;A0A6Q8PF26;A0A6Q8PFF8	CHMP1A
-1.60928	0.437051	0.00244856	1.44279	0.0874343	-0.36044			0.399843	0.398251	0.358457	0.119471	0.944816	A0A6Q8PGH7;A0A6Q8PFA6;A0A6Q8PG37;A0A6Q8PH57;O00139;D6R9M0;A0A6Q8PGG1;A0A669KBE9;D6RD93;H0Y8H2	KIF2A
-1.78548	-0.0513763	-0.378462	0.837646	0.776985	0.600689	+	oe_kk47	1.29006	0.0512791	0.0289343	0.379711	2.75181	A0A7I2PK44;A0A6Q8PG15;A0A6Q8PFE1;O95831;A0A6Q8PFM5;A0A6Q8PFQ8;A0A6Q8PFS4;A0A6Q8PHC0;A0A6Q8PHJ9;A0A6Q8PFA7;A0A7I2RLJ8;A0A6Q8PFW2;E9PMA0;A0A6Q8PF87;A0A6Q8PHJ4;A0A6Q8PFN1	AIFM1
1.08311	0.820212	0.816799	-0.792168	-0.985466	-0.94249	+	oe_kk47	4.1661	6.82182e-05	0.000534653	-0.824933	-17.1242	A0A6Q8PFJ0;P02545;A0A804HL68;A0A6Q8PHQ9;A0A6Q8PF80;A0A6Q8PGH0;A0A6Q8PFM1;A0A6Q8PF59;A0A6Q8PFF5;REV__Q5VX52	LMNA
0.580813	0.671522	0.736042	-1.24273	0.588318	-1.33397			0.990161	0.102291	0.0590952	-3.71321	-2.11173	A0A6Q8PGT8;A0A6Q8PFL5;A0A6Q8PG02;A0A6Q8PGF7;A0A6Q8PGB2;Q6UWE0;A0A6Q8PGW1;A0A6Q8PFT9;A0A6Q8PFL1;A0A6Q8PFI6;A0A6Q8PH70;A0A6Q8PFW1;A0A6Q8PHH6	LRSAM1
-1.01028	-0.467015	-1.17732	0.826248	1.01664	0.81173	+	oe_kk47	2.85492	0.00139663	0.00166154	0.557539	7.8882	A0A6Q8PFU3;P43034;A0A6Q8PFT2;A0A6Q8PG63;A0A6Q8PH33;I3L3N5;I3L495	PAFAH1B1
-1.11837	-0.479937	-1.06068	0.765559	1.03404	0.859384	+	oe_kk47	2.90109	0.00125577	0.00143195	2.78364	8.11181	Q9BXW9;A0A6Q8PFY3;H7BZJ7	FANCD2
1.19009	0.7888	0.696099	-0.878042	-1.11232	-0.684624	+	oe_kk47	3.0951	0.000803341	0.00150604	-0.159574	-9.11582	A0A6Q8PFY7;Q92734;A0A6Q8PFC4;A0A6Q8PH89;A0A6Q8PH27;A0A6Q8PG00;A0A6Q8PG04;A0A6Q8PGS4;A0A6Q8PF40;C9JJP5;C9JUE0;C9JTY3;A0A6Q8PF51	TFG
-1.3473	-0.799033	-0.381229	0.602557	0.658294	1.26671	+	oe_kk47	2.06151	0.00867941	0.00641126	0.582631	4.79505	A0A6Q8PG51;A0A6Q8PHJ5;A0A6Q8PGP5;A0A6Q8PFI7;Q96PU5;A0A1B0GVY1;K7ERN1;A0A7P0Z498;A0A6Q8PG81;K7EKL1;H0Y8H4;K7ENS6	NEDD4L
0.450762	-0.264873	-1.92395	0.484047	0.579486	0.674524			0.754885	0.175839	0.118715	0.0770887	1.64246	A0A6Q8PGB0;P24928	POLR2A
0.635298	1.0724	0.946183	-0.687722	-0.713581	-1.25257	+	oe_kk47	2.84734	0.00142122	0.0018	-0.304455	-7.85204	P49588;A0A6Q8PGN5;A0A6Q8PFY2;A0A6Q8PF33;H3BPK7;A0A6Q8PGE8;A0A6Q8PGR9;A0A6Q8PGB5;A0A6Q8PFK3;A0A6Q8PHJ2;A0A6Q8PH44;A0A6Q8PHP7;A0A6Q8PHP3;A0A6Q8PF77;A0A6Q8PG28;A0A6Q8PG62;A0A6Q8PGI8;A0A6Q8PHN5	AARS
-0.110085	1.24607	1.15066	-0.303277	-1.15345	-0.829914	+	oe_kk47	1.41332	0.0386082	0.0218539	-0.661029	-3.03454	A0A6Q8PGU6;Q8NB90	SPATA5
-1.41196	-0.268789	-0.711951	0.396843	1.37079	0.625062	+	oe_kk47	1.63971	0.022924	0.013902	0.492659	3.59185	A0A6Q8PGV8;O95140;A0A6Q8PFJ4;A0A6Q8PGS9;A0A6Q8PGA3;A0A6Q8PGR2;Q5JXC5	MFN2
0.504634	0.961717	1.17483	-0.941467	-0.616053	-1.08367	+	oe_kk47	2.72678	0.00187594	0.0017594	-0.754997	-7.29631	A0A6Q8PH91;Q9BQ69	MACROD1
0.810965	1.02421	0.889492	-1.041	-0.81874	-0.864929	+	oe_kk47	4.41112	3.88043e-05	0.000760563	-2.98787	-19.7455	Q27J81;A0A6Q8PHA2;A0A6Q8PHG2;A0A6Q8PH71;A0A6Q8PGN3;A0A6Q8PH25;A0A6Q8PF29;A0A6Q8PF44;A0A6Q8PFW4;A0A6Q8PGC7;A0A087X118;A0A0A0MQU1;A0A6Q8PH63;A0A6Q8PHS8;A0A6Q8PFN5;A0A6Q8PGU8;A0A6Q8PH59;A0A6Q8PFB9;A0A6Q8PGY8;A0A6Q8PH52;A0A6Q8PFY4;A0A6Q8PG64;A0A6Q8PFJ1;A0A6Q8PEY5;A0A6Q8PGX4;A0A6Q8PF91;A0A6Q8PEY8;A0A6Q8PGK9	INF2
-1.59155	-0.14004	-0.641037	0.849935	1.03949	0.483202	+	oe_kk47	1.59184	0.0255953	0.0146628	1.33833	3.4695	A0A6Q8PHD1;P06280;A0A6Q8PHM8;A0A6Q8PGG0;A0A6Q8PFA9;A0A3B3IUC4;V9GYN5;A0A669KAY7;A0A669KB83;A0A3B3IRU3	GLA
-1.30796	-0.862213	-0.28059	1.22075	0.283041	0.946969	+	oe_kk47	1.79613	0.0159908	0.0105338	0.48498	4.01043	A0A6Q8PHK0;A0A6Q8PGG9;Q14669;H7C2Y1	TRIP12
0.957283	0.649798	1.02888	-0.487774	-0.904559	-1.24363	+	oe_kk47	2.68173	0.00208099	0.00206561	-0.793049	-7.09777	P49902;A0A6Q8PHP0;A0A6Q8PHB5;Q5JUV4;Q5JUV6;A0A6Q8PG36;A0A6Q8PFH2;H0YHR8;REV__H0YES7;REV__M0QX83;REV__A0A804HLB1;S4R3A6;A0A6Q8PEZ2;S4R3E7;REV__Q17RW3;REV__A0A1B0GW38;A0A6Q8PF50	NT5C2
-1.70721	0.0705525	-0.576955	0.94742	0.477643	0.788553	+	oe_kk47	1.28734	0.0516012	0.0292808	1.26859	2.74571	I3L170;A0A7I2PLE3;A0A7P0T936;A0A0G2JQJ7;A0A0G2JPD5;A0A0G2JS76;A0A0G2JMX7;A0A7I2PJZ2;P10636	MAPT
-0.986917	1.30396	-1.31701	0.510382	0.569462	-0.0798753			0.321814	0.476635	0.48095	0.123687	0.784437	O14964;A0A7I2V2R9;A0A7I2V2K2;A0A7I2V5A2;A0A7I2V2D8;A0A7I2V2W5;A0A7I2V3F9;A0A7I2V3J3;A0A7I2V5A3;A0A7I2V307;A0A7I2V3I8;A0A7I2YQD1;I3L1P5;A0A7I2V637;A0A7I2V6E0;A0A7I2V3Z1;A0A7I2V4X6;A0A7I2V5D6;I3L1E3;A0A7I2V628;I3L165;A0A7I2V5N3;A0A7I2V5W6;A0A7I2YQU5;A0A7I2V4J7;A0A7I2V331;A0A7I2V5B7;A0A7I2V5L9;A0A7I2V5X2;A0A7I2V674;A0A7I2V3Q7;A0A7I2V558	HGS
-0.287932	-0.806865	-1.37417	0.495487	0.68268	1.2908	+	oe_kk47	1.85187	0.0140647	0.00960816	0.260523	4.16706	H7C4K3;A0A7I2V2F9;E7EUI6;P05556;A0A7I2V348;C9JPK5;A0A7I2V5Z8;A0A7I2V5T3;Q5T3E6;E9PLR6;E7EQW5;Q5T3E5;E9PQJ2;H7C4N8	ITGB1
0.611883	0.579408	-2.0143	0.311007	0.207568	0.304432			0.249653	0.562791	0.624066	0.357179	0.630168	P27448;A0A7I2V3K2;A0A7I2V639;A0A7I2V3I9;A0A7I2V4T2;A0A7I2V409;A0A7I2V2I9;A0A7I2V3P5;A0A7I2V3C6;A0A7I2V3B9;A0A7I2V5G3;A0A7I2YQF7;J3KNR0;A0A7I2V4K8;H0YJI9;A0A7I2V2U9;H0YNV4;A0A7I2V602;A0A7I2YQF4;A0A7I2V2N8;A0A7I2V549;H0YKP9;A0A7I2V4G7;A0A7I2V2E3;A0A7I2V4L1;H0YIY6;A0A7I2V5H7;A0A7I2V4T5;A0A7I2V4P8;A0A7I2V2J6;A0A7I2YQ91;A0A7I2V483;A0A7I2YQ84;A0A7I2YQJ7;A0A7I2V3Q1	MARK3
-1.28645	-0.180442	-0.855938	1.29102	0.952263	0.0795471	+	oe_kk47	1.48379	0.0328254	0.0187016	0.528801	3.2024	F8VZJ2;F8VNW4;F8W0W4;A0A7I2V2K5;H0YHX9;A0A7I2V473;Q13765;E9PAV3;F8VZ58	NACA
-0.774835	0.803747	1.44056	-1.18356	0.201098	-0.487009			0.564821	0.272382	0.205971	-0.201682	-1.27172	A0A7I2V466;A0A7I2V2Q8;P53634;A0A7I2YQT5;A0A7I2V6E3;A0A7I2V5C5;H0YCY8;A0A7I2V2V5;A0A7I2V5L5;A0A7I2V2F3;A0A7I2V4Z3;A0A7I2V3A2;A0A7I2V5J2;A0A7I2V3M6	CTSC
-1.75971	0.859631	0.823269	-0.235932	0.593472	-0.280731			0.0186612	0.957941	0.973686	0.0105451	0.0561154	A0A7I2V2R3;A0A7I2V5D8;P51991;A0A7I2V4J6;A0A7I2V402;A0A7I2V4G0;H7C1J8	HNRNPA3
-0.678513	-1.63727	0.295576	0.33295	0.499134	1.18812			1.02597	0.0941955	0.0527237	0.247571	2.18519	A0A7I2V4T9;A0A7I2V2U2;A0A7I2V5Z3;A0A7I2V588;O43765;A0A7I2V697;K7EMD6;A0A7I2YQY5;K7ERW5	SGTA
-1.49333	0.627087	-0.801422	1.12404	-0.130196	0.673826			0.70009	0.199485	0.137291	0.0362962	1.53539	A0A7I2V2U6;P13995;B9A062;A0A7I2V482;B8ZZU9;A0A7I2YQD4	MTHFD2
1.07438	0.521297	0.76152	0.0786761	-1.32065	-1.11523	+	oe_kk47	1.55683	0.0277441	0.0162235	-2.31257	-3.3816	A0A7I2YQE9;B7Z2R7;A0A7I2YQD7;A0A7I2V5E1;A0A7I2V2Y9;Q5T8D3;A0A7I2V347;A0A7I2V560;A0A7I2YQJ9;A0A7I2V2M2;A0A7I2V420;A0A7I2V5U2;A0A7I2V690;A0A7I2V5L4;A0A7I2V556;A0A7I2YQS1;X6RDD7;A0A7I2V462;Q5T8E0;A0A7I2V2R8	ACBD5
-0.929543	-0.960127	-0.839723	0.837096	0.85168	1.04062	+	oe_kk47	4.76999	1.69828e-05	0	1.15417	24.3116	A0A7I2V351;A0A7I2V487;A0A7I2YQE1;P52292;A0A7I2V3Z3;J3QLL0;J3KS65;J3QL07	KPNA2
-1.00697	-0.797587	-0.883338	0.639938	0.846519	1.20144	+	oe_kk47	3.29139	0.000511223	0.000895277	0.68866	10.2474	Q8WVM8;A0A7I2V3B4;A0A7I2V5I2;A0A7I2V4B8;A0A7I2V5Z4;A0A7I2V3G4;A0A7I2V4U2;A0A7I2V4R0;A0A7I2V320;A0A7I2V590;A0A7I2V2U5;B7Z5N7;A0A7I2V448;A0A7I2V362;G3V2M8;H0YIZ7;A0A7I2V3C9;A0A7I2YQR2;G3V5E2;A0A7I2V5H5;A0A7I2V534;H0YJY1;A0A7I2YQQ1;A0A7I2V321;J3KNG4;A0A7I2V5R9;A0A7I2V3Y3;A0A7I2V4B9;A0A7I2V414;G3V4I1;G3V5F3;H0YJS6;G3V363;G3V3K9;A0A7I2V5L2	SCFD1
-0.0115408	-1.16974	-1.03263	1.22578	-0.0418958	1.03003	+	oe_kk47	1.28781	0.0515454	0.0292485	0.14282	2.74676	P60228;A0A7I2V3I0;A0A7I2V3S3;A0A7I2V2H9;A0A7I2V2W0;A0A7I2V5Z6;A0A7I2V3I2;H0YBP5;A0A7I2V4B4;B3KW56;A0A7I2V4G3;E5RGA2;A0A7I2V5P9;E5RHS5;A0A7I2V570;A0A161SXE1;A0A7I2V3W9;A0A7I2V429;H0YBR5;A0A7I2V2Q9;A0A7I2V2S9;A0A7I2V5K7;E5RII3;H0YAW4;E5RJ25;E5RIP5	EIF3E
-0.952948	-0.83234	-0.89361	1.09334	0.520592	1.06496	+	oe_kk47	3.14998	0.000707978	0.00139671	2.30683	9.41989	A0A7I2V3I1;P09601;B1AHA8;A0A7I2V277;A0A7I2V3M0	HMOX1
-1.3728	1.1751	1.03354	-0.570736	0.258257	-0.523363			0.254609	0.556405	0.614774	-0.0882155	-0.640997	A0A7I2V3R8;P09651;A0A7I2V3W0;F8W6I7;A0A7I2V2L6;A0A7I2YQX9;F8VZ49;A0A2R8Y4L2;Q32P51;F8VTQ5;H0YH80;F8W646;A0A7I2V5U9;A0A7I2V334;A0A7I2V453;A0A7I2V3K5;A0A7I2V2R4;A0A7I2YQ85;A0A7I2V661;A0A7I2V4P7;A0A7I2YQY2;A0A7I2V5P1;A0A7I2V360;A0A7I2V2Z4;A0A7I2V4M0;A0A7I2YQV3;A0A7I2V3C7;A0A7I2V3U8;A0A7I2V2F1;A0A7I2V5N7;A0A7I2V5T1;A0A7I2V4F8;A0A7I2V2M7;A0A7I2V520;A0A7I2V459;A0A7I2V2Q7;A0A7I2V5H0;A0A7I2V3W4;A0A7I2V5L…	HNRNPA1;HNRNPA1L2
-1.53811	-0.391879	-0.59134	0.88899	0.880945	0.751395	+	oe_kk47	2.03656	0.00919263	0.00687558	1.59595	4.7169	Q9P0M6;A0A7I2V412;A0A7I2V423;A0A7I2YQD6;Q5SQT3;A0A7I2YQR8;A0A7I2V2N7;A0A7I2V6E9;A0A7I2V3R0;A0A7I2V633;A0A7I2V3M7;A0A7I2V3Z8;A0A7I2V522;A0A7I2YQF0;A0A7I2V3B3;A0A7I2V3C2;A0A7I2V4W8;A0A7I2V5A9;A0A7I2V583	H2AFY2
0.934591	0.796807	0.649719	-0.308125	-0.393881	-1.67911	+	oe_kk47	1.61175	0.0244484	0.014455	-0.117147	-3.52008	A0A7I2V428;C9JLB1;P19338;A0A7I2V3F3;H7BY16;A0A7I2V5M5;A0A7I2V2U7;A0A7I2V349;A0A7I2V506;A0A7I2V699;A0A7I2V2S8	NCL
-0.339391	-1.15324	-1.11042	1.07287	0.769251	0.760926	+	oe_kk47	2.44193	0.00361468	0.00259492	0.200805	6.11797	A0A7I2V430;A0A7I2V4F0;Q92499;A0A7I2V2M5;A0A087WZ71;A0A7I2YQ77;A0A087X2G1;A0A7I2V4J3;A0A7I2V421;A0A7I2V5X8;A0A7I2YQD0;A0A7I2V4Q0	DDX1
1.1231	0.909293	0.659321	-1.0932	-0.846332	-0.752174	+	oe_kk47	3.35905	0.000437472	0.000502165	-0.745106	-10.6671	A0A7I2V484;A0A7I2V5M3;P07711;Q5T8F0;A0A7I2YQA2	CTSL
-1.68247	0.817847	1.11745	-0.187351	0.294726	-0.360203			0.064536	0.861914	0.908552	-0.00852203	-0.185431	A0A7I2YQA8;A0A7I2V5F1;A0A7I2YQQ0;A0A7I2V5D0;A0A7I2V490;P26358;A0A7I2V5F6;A0A7I2V311;K7ENW7;K7EJL0;A0A7I2V2G5;K7EMU8;A0A7I2V3F8;K7EIZ6;K7EP77	DNMT1
-1.16716	-0.810869	-0.722709	0.769283	0.944955	0.9865	+	oe_kk47	3.54429	0.000285568	0.000602597	0.812152	11.9006	A0A7I2V4K5;X6R5C5;X6R8A1;P10619;A0A7I2V4D1;A0A7I2YQT8;A0A7I2V3B2;Q5JZH0;A0A7I2V4R8	CTSA
0.28296	-0.97523	-1.51262	0.829314	0.534551	0.841027	+	oe_kk47	1.27351	0.0532709	0.0301951	0.98638	2.71483	A0A7I2V4L6;O15498;A0A7I2V3A1;A0A7I2V3V7;A0A7I2V530;H7C3K7;A0A7I2V3S2	YKT6
1.63752	-0.860334	-0.978927	-0.195444	-0.302897	0.700082			0.0507557	0.889701	0.925864	0.0104542	0.147733	A0A7I2V5Y7;A0A7I2V535;Q15233;A0A7I2V4J2;A0A7P0MRW0;A0A7I2V4K9;A0A7I2V4N2;A0A7I2V464;H7C367;C9JYS8;C9IZL7;C9J4X2;A0A7I2YQK8	NONO
0.118919	0.757661	1.48292	-0.456209	-0.640701	-1.26259	+	oe_kk47	1.56195	0.0274189	0.0161121	-0.398768	-3.39438	A0A7I2V539;P30419;A0A7I2V3X4;A0A7I2V3U5;A0A7I2V4Y5;Q5VUC6;O60551;K7EN82;B7Z8J4;K7EN42;A0A7I2V3M5	NMT1
-0.267721	-0.556247	1.37433	0.175091	-1.46643	0.740985			0.153283	0.702614	0.787821	-0.0267798	-0.410295	Q5JRX3;A0A7I2V5C6;A0A7I2YQT2;A0A7I2V5H2;A0A7I2YQX5;A0A7I2V397;A0A0A0MRX9;A0A7I2V3B6;A0A7I2V3X0;H0Y4F7;A0A7I2V5R2;A0A7I2V4N3;A0A7I2V449;B1APQ0;H0Y7L7;A0A7I2V5K2;B4DEU0	PITRM1
-1.73893	0.325568	1.19916	0.59634	-0.233057	-0.149084			0.0540799	0.882917	0.921688	0.0273463	0.15691	C9JN15;A0A7I2V629;E9PG73;A0A7I2V5Q5;Q13427;A0A7I2V4W3;C9JM79;A0A7I2V4F2;C9J679	PPIG
0.978446	0.947685	0.773153	-1.04799	-1.03193	-0.619368	+	oe_kk47	3.51163	0.000307872	0.000578554	-0.480357	-11.6737	A0A7I2V5R1;Q8TD19;A0A7I2V454;G3V5V0;G3V2Z5;G3V459;A0A7I2V4E9	NEK9
-0.694464	-0.940132	-1.03139	0.530848	1.13433	1.0008	+	oe_kk47	2.98059	0.00104571	0.00137323	0.863335	8.51033	Q5JWF2;Q5JWE9;A0A7I2V5R6;P63092;A0A590UJQ2;A0A590UJI6;B0AZR9;A0A590UJ22;A0A590UJR6;A0A590UJY8;A0A590UJQ9;A0A0A0MR13;A0A590UJB7;A0A590UJ58;S4R3V9;A0A590UKA4;A0A590UJA5;A0A590UJG5;A0A590UK28;A0A590UKA1;A0A590UJJ0;A0A590UJB0;A0A804HIH4;A0A590UJF0;A0A590UKB4;A0A590UKA9;A0A590UJS2;A0A590UJY2;P38405;S4R3E3;H0Y7E8;K7EPE2;K7EQ80;A0A590UK00;A0A590UJX6;A0A590UJC9	GNAS
-1.42627	-0.343035	-0.36774	0.784392	1.44533	-0.0926831	+	oe_kk47	1.17342	0.067078	0.0370074	0.14167	2.49565	A0A7I2V5S2;A0A7I2YQC0;P06748;A0A7I2V433;A0A7I2V2X9;A0A7I2V3U2;A0A7I2V4G8;A0A7I2V3G5;A0A7I2V579;A0A7I2V5J8;E5RI98;E5RGW4	NPM1
-1.07666	-0.791603	-0.852914	0.804232	0.922512	0.994431	+	oe_kk47	4.2169	6.06876e-05	0.000574468	0.752906	17.6381	A0A7I2V5T4;Q99798;A0A7I2V3U0;A0A7I2V586;A0A7I2V3F1;A2A274;A0A7I2V5A1;A0A7I2V614;A0A7I2V538;A0A7I2V6A6;A0A7I2V5W7;A0A7I2V3C8;A0A7I2V4I8;A0A7I2V5U4;A0A7I2V2Y4	ACO2
-0.077581	1.23074	1.2411	-0.864408	-0.868556	-0.661302	+	oe_kk47	1.64357	0.0227211	0.013831	-0.841901	-3.60184	A0A7I2V5T7;Q9H7Z7;A6NHH0;A0A7I2V5X6;X6RJ95	PTGES2
-1.11218	-0.653768	-0.931852	0.933435	0.741638	1.02273	+	oe_kk47	3.47952	0.000331497	0.000556355	0.285331	11.4546	A0A7I2V5Y5;Q02241;A0A2U3TZL8;H7BYN4;H0YME6;A0A2R8Y531;H0YMJ4	KIF23
-0.738262	-0.7044	-0.810205	1.68975	-0.0982788	0.661396	+	oe_kk47	1.35262	0.0443997	0.0253462	0.287374	2.89365	P07858;E9PHZ5;A0A7I2V668;A0A7I2V440;A0A7P0NGZ6;A0A7I2YQK9;E9PR21;A0A7I2V4Z9;E9PQM1;E9PSG5;A0A7I2V4S6;E9PKQ7;E9PNL5;E9PLY3;E9PCB3;A0A7I2V302;A0A7I2V367;A0A7I2V2J1;R4GMQ5;E9PS78	CTSB
0.82766	1.26377	0.423906	-1.31812	-0.803619	-0.393598	+	oe_kk47	2.01325	0.00969952	0.00731377	-0.252155	-4.64476	A0A7I2YQ74;Q16851;E7EUC7;A0A087WYS1;A0A7I2V676;C9JNZ1;C9JVG3;A0A7I2V4T0;C9JQU9;C9JWG0;A0A7I2V2Q3;C9JUW1;C9JTZ5;F2Z3H1;F2Z3P4;C9J6Q0;F8WC70;C9J3M0	UGP2
0.107423	-1.02995	-1.40382	0.476221	0.82841	1.02172	+	oe_kk47	1.49097	0.0322872	0.0182942	0.228332	3.21979	A0A7I2YQ95;H7C4F6;O00629;A0A7I2V340;A0A7I2V333;A0A7I2V5X0	KPNA4
0.336721	1.25385	0.530633	-1.64815	0.0833214	-0.556379	+	oe_kk47	1.15176	0.0705083	0.0391348	-0.115033	-2.44916	Q13347;A0A7I2YQF8;A0A7I2V3U3;A0A7P0MRT9;A0A7I2V3N2;A0A7I2V685;A0A7I2V2M3;A0A7I2V640;A0A7I2V607;A0A7I2V613;A0A7I2YQI2;Q5TFK1;A0A7I2YQI6;A0A7I2V4S8;A0A7I2V5V8;A0A7I2YQU2;A0A7I2YQC8;A0A7I2V3K6;A0A7I2YQT9;A0A7I2YQP9;A0A7I2V4C2;A0A7I2V391;A0A7I2YQN1;A0A7I2YQX4;A0A7I2V5E4;A0A7I2V3T4;A0A7I2V415	EIF3I
1.56446	0.654889	0.111323	-1.04133	-0.957413	-0.331932	+	oe_kk47	1.4999	0.0316301	0.0180794	-0.337303	-3.24146	J3QR09;J3KTE4;A0A7I2YQG2;P84098;A0A7I2V4U6;A0A7I2V2L0;A0A7I2V512;A0A7I2V638	RPL19
-0.303282	0.240378	-1.64483	-0.0637982	0.351179	1.42035			0.730779	0.185875	0.12654	0.185926	1.5953	A0A7I2YQI5;Q9Y5P6;A0A7I2V4B5;A0A7I2V2Y5;A0A7I2V691	GMPPB
-1.34945	-0.841231	-0.42885	0.867048	0.872778	0.879707	+	oe_kk47	2.55363	0.00279492	0.00216927	0.428354	6.55885	G5E9W7;A0A7P0MKV3;P82650;H7C5L9;H7C5F2;H7C5H3;C9J5D8	MRPS22
0.758879	-1.82628	0.331516	-0.399958	0.273078	0.862765			0.217069	0.60664	0.68748	0.0271568	0.557934	A0A7P0SXD0;A0A7I2YQL3;A0A499FIZ0;Q9H7D7;A0A7I2YQQ9;H0Y9R3;C9JCS7;H0Y917;A0A7I2V3I7	WDR26
-0.824158	-0.488041	-1.23543	1.02631	1.17646	0.344851	+	oe_kk47	2.14717	0.00712574	0.00521696	0.324075	5.07095	A0A7P0TA34;A0A7P0T7Z2;Q9Y6D5;A0A7P0T9L9;A0A7P0T9L6;A0A7P0Z446	ARFGEF2
1.4739	0.795306	0.255959	-0.834681	-0.800316	-0.890166	+	oe_kk47	2.05181	0.00887544	0.00650543	-0.559024	-4.76457	Q99986;A0A7P0Z3Z7;A0A7P0T952;A0A7P0T977;A0A7P0Z445;A0A7P0T8N0;A0A7P0TA65;A0A7P0T9T1;A0A7P0TB15;H0YJJ9;A0A7P0Z462;A0A7P0TBB8;A0A7P0T838;A0A7P0TAS8;A0A7P0TBE4;H0YJF7;A0A7P0TAA6;A0A7P0TA16;A0A7P0T824;A0A7P0T9I1;A0A7P0T9E5;A0A7P0Z4A4;A0A7P0TBI6;A0A7P0T9C6;A0A7P0T925;A0A7P0T814;A0A7P0TB08;H0YJ50;A0A7P0T9B1;A0A7P0T832;A0A7P0Z4C8;A0A7P0T8M0;A0A7P0T8Z5;A0A7P0TAI5;A0A7P0Z4P9;A0A7P0TA07;A0A7P0TB37;A0A7P0T8…	VRK1
-0.290072	1.17644	1.29003	-1.00054	-0.29188	-0.883975	+	oe_kk47	1.22994	0.0588925	0.0325524	-0.679584	-2.6185	E9PHM6;F6QMI7;A0A7P0T890;Q03001;F8W9J4;A0A0U1RQJ2;A0A494C073;A0A494C1D7;E7ETB9;A0A494C1U5;Q5T0V7;Q6P0N6;E7ERX3;H0YC82	DST
0.971197	1.03162	0.493989	-0.697599	-1.46674	-0.332461	+	oe_kk47	1.945	0.0113501	0.0082576	-0.363718	-4.43817	A0A7P0T893;O43823;M0QX51;A0A7P0TBC8	AKAP8
-1.58932	0.777771	0.119472	0.179243	1.17599	-0.66316			0.201346	0.629005	0.712559	0.0815665	0.522375	A0A7P0T8J7;A2A2Q9;A0A7P0TA70;Q9Y312	AAR2
0.83042	-0.787175	0.419915	0.895989	0.265939	-1.62509			0.125671	0.748736	0.826189	-0.0222301	-0.343188	A0A7P0T8N8;O14776;G3V220;Q5VWI1	TCERG1
-1.5087	-0.855631	-0.0684275	0.892607	0.724022	0.816133	+	oe_kk47	1.74443	0.0180123	0.0113058	2.07045	3.86876	Q9Y6K5;A0A7P0T9J0;A0A7P0Z4D0;A0A7P0T8S7;A0A7P0T9W6;A0A7P0TAU8;A0A7P0Z4F1;A0A7P0TAC0;A0A7P0Z4F5;A0A7P0T7V2;A0A7P0TAS0;A0A7P0TB73;A0A7P0TAC8;A0A7P0TAV3;A0A7P0T8J8;A0A7P0TA50;F8VS35;A0A7P0T9Z5;A0A7P0TAT5;F8VWK9;A0A7P0TA44;A0A7P0T884;A0A7P0TB72;A0A7P0Z4Q3	OAS3
-0.775761	-0.992785	-0.962297	0.890778	0.911347	0.928719	+	oe_kk47	4.9186	1.20615e-05	0	2.48703	26.4947	A0A7P0T8Z7;A0A7P0Z4A5;A0A7P0T8S8;Q9Y5X1;A0A7P0Z4A2;A0A7P0T8D4;A0A7P0T8Z2;A0A7P0T8C7;A0A7P0TBI9;A0A7P0T8M2	SNX9
-0.0273691	-0.957011	-1.41022	1.14679	0.601279	0.64653	+	oe_kk47	1.64439	0.0226783	0.0138476	0.314642	3.60396	A0A7P0T9X2;B4DR67;A0A7P0TAL2;A0A7P0T901;A0A7P0T9B8;Q9Y673;A0A7P0T850;A0A7P0Z4I2;A0A7P0TB27;A0A7P0T882;A0A7P0T8X9;A0A7P0T9C7;A0A7P0TA98;A0A7P0TAI2	ALG5
-0.353198	-1.50512	-0.672539	0.926949	0.724243	0.879662	+	oe_kk47	2.07497	0.00841453	0.00629384	2.22694	4.83764	A0A7P0T907;Q06710;G3V3F3;H0YJD1;E7ERW5;E7EQT0;Q02548	PAX8
-1.05326	-1.09644	-0.519169	0.764495	0.849435	1.05495	+	oe_kk47	3.01577	0.00096434	0.00141329	0.19829	8.69232	P27824;A0A7P0TAE9;A0A7P0T937;A0A7P0TB65;A0A7P0T9L0;A0A7P0T840;A0A7P0T8G1;A0A7P0Z4D6;A0A7P0Z484;D6RGY2;A0A7P0TAR9;A0A7P0Z4H2;A0A7P0TAN9;D6RFL1;A0A7P0T8N1;D6RAU8;D6RAQ8;D6RD16	CANX
0.835758	0.914034	0.780633	-1.4258	-0.225465	-0.879161	+	oe_kk47	2.07321	0.0084487	0.00628887	-1.13798	-4.83204	Q06330;A0A7P0T947;A0A7P0T9Y9;A0A7P0Z4N7;A0A7P0TBJ4;D6R927;D6RF98;D6RBQ8;D6RA45;D6RCM1;A0A7P0T9W9;D6R946;D6RB37;D6REC2;D6R9K5;D6R9X3;D6RIZ8;D6RAT2;A0A7P0TA33;A0A7P0T806;A0A7P0T964;A0A7P0T821;A0A7P0T848;A0A7P0T7Z3;D6RIV8;D6REP3	RBPJ
1.21469	0.733383	-0.708346	-1.52895	0.374213	-0.0849886			0.43491	0.367358	0.316091	-0.1577	-1.01536	Q9UBR2;A0A7P0T989;A0A7P0T8I6;A0A7P0TBB5;A0A7P0T8X2;A0A7P0TBM7;A0A7P0T900;A0A7P0TA25;A0A7P0TB41;A0A7P0T9U1;A0A7P0Z4R9;A0A7P0TAD4;A0A7P0TAT6;A0A7P0T926;A0A7P0Z469;A0A7P0T9G9;A0A7P0T9U4;A0A7P0Z4L7	CTSZ
0.52134	-1.3414	-1.18406	0.383413	0.628035	0.992676			1.00767	0.0982494	0.0552871	0.469741	2.14757	Q5VIR6;A0A7P0T9B2;A0A7P0Z400;A0A7P0TAE0;A0A7P0TAK4;A0A7P0Z4K0;A0A7P0TA79;A0A7P0Z461;A0A7P0T874;A0A7P0T8P7;A0A7P0T9V8;A0A7P0TBK3;A0A7P0TA53;F6VX93;A0A7P0TB80;A0A7P0T8V1;E7EVT8;A0A7P0TB16;A0A7P0T8A5;I3L184;A0A7P0Z4Q7;A0A7P0TAF8;A0A7P0T805;I3L0S6;A0A7P0TBJ8;I3L4P9;A0A7P0T8D0;A0A7P0T8V2;A0A7P0T9Z7;A0A7P0T9X9;A0A7P0T7U9;A0A7P0TA82	VPS53
1.74681	0.0596721	-0.124808	-1.08925	-0.828932	0.236504			0.710676	0.194681	0.133302	-0.221694	-1.55604	A0A7P0TBF3;A0A7P0T9R9;A0A7P0T9E7;A0A7P0TAR1;P43155;H0Y4Z7;A0A7P0TAQ4;B7ZBP5;A6PVN3	CRAT
0.794067	1.1259	0.787192	-1.06381	-0.830097	-0.813255	+	oe_kk47	3.70533	0.000197092	0.000700906	-1.66287	-13.0824	A0A7P0T9I3;O95205;Q5JSC0	MBLL
-1.21159	-0.634524	1.50801	-0.624249	0.44524	0.517114			0.0884409	0.815754	0.878244	0.0174065	0.24882	P43490;A0A7P0T9I9;A0A7P0T895;A0A7P0T931;A0A7P0T8L3;A0A7P0T973;A0A7P0TAS5;A0A7P0T862;A0A7P0T8D2;A0A0C4DFS8;A0A7P0T941;A0A7P0TBB7;A0A7P0TA73;A0A7P0Z466;B7Z8W6;A0A7P0Z4N0;A0A7P0T9F0;A0A7P0TB17;A0A7P0T8Z3;A0A7P0T8R4;A0A7P0TAI8;A0A7P0Z437;C9JG65;C9JF35;A0A7P0Z4L4;A0A7P0TAZ2	NAMPT
-0.409675	-0.39571	-0.881279	-0.31924	1.94772	0.0581792			0.714483	0.192982	0.132026	0.403756	1.56347	A0A7P0TB24;A0A7P0T9J6;Q9NXE4;H7C1Q6;H7C0W5;A0A7P0TB44;H7C235;H7C2E2;A0A7P0TAZ0;A0A7P0T8J0;A0A7P0Z453;C9J647;F8WF03;F2Z2I0;F2Z2W5	SMPD4
0.317854	1.12737	1.05476	-0.297262	-1.07744	-1.12528	+	oe_kk47	1.95631	0.0110583	0.00814847	-0.635725	-4.47193	A0A7P0T9W1;P11182;A0A7P0Z494;Q5VVL7	DBT
0.992935	0.809056	0.8413	-0.417494	-1.12585	-1.09994	+	oe_kk47	2.74565	0.00179618	0.00178399	-0.358067	-7.38092	P07237;A0A7P0TA35;A0A7P0TB26;A0A7P0T9K9;A0A7P0TA71;A0A7P0T8C0;I3L3P5;H7BZ94;A0A7P0T8J3;I3L4M2;A0A7P0T9U6;A0A7P0T8X1;A0A7P0TA97;H0Y3Z3;I3L0S0;A0A7P0T9D6;I3L514;B3KTQ9;A0A7P0Z4J0;A0A7P0Z4S2;A0A7P0TAX9;I3NI03;A0A7P0TBP8;A0A7P0Z476;I3L3U6;A0A7P0T9S9;A0A7P0T9E3;I3L1Y5;A0A7P0T940;A0A7P0Z4B2;A0A7P0TBA3;A0A7P0Z4F8	P4HB
1.30676	0.925866	0.311777	-1.01096	-1.03146	-0.501979	+	oe_kk47	2.13282	0.00736512	0.00532457	-0.688782	-5.02389	A0A7P0TA76;O95573;A0A7P0T8L6;A0A7P0TBB1;A0A7P0TB52;A0A7P0T905;H7BYZ7;A0A7P0TBL9;F5GWH2	ACSL3
1.10896	0.772446	0.812999	-0.902692	-0.680705	-1.11101	+	oe_kk47	3.41039	0.000388696	0.000526077	-1.02134	-10.9962	A0A7P0TA85;P35613;A0A7P0TB04;I3L192;A0A087WUV8;A0A2R8YDZ0	BSG
-1.27564	0.226346	0.592152	1.06007	0.611048	-1.21398			0.123818	0.751938	0.828956	0.0137819	0.3386	A0A7P0TAE1;H0YIV0;A0A7P0TAT8;P14625;A0A7P0T823;A0A087WT78;A0A7P0T917;A0A7P0TAY2;A0A7P0TBC2;A0A7P0T8R3;A0A7P0T885;A0A7P0Z405;Q58FF3;F8W026	HSP90B1
0.578566	-0.343011	0.698272	0.581728	0.376497	-1.89205			0.293841	0.508346	0.534686	-0.190751	-0.725448	A0A7P0TAE3;Q9ULX6;A0A7P0TAJ5;A0A7P0T847;A0A7P0TBP0;V9GZ50;A0A7P0T9N5;A0A7P0TAD3	AKAP8L
-1.1323	-1.002	-0.525881	1.08	0.896038	0.684151	+	oe_kk47	2.91418	0.00121848	0.00144262	0.693099	8.17627	A0A7P0TAG1;A0A7P0TBE2;P10515;A0A7P0Z4G4;A0A7P0T997;A0A7P0TAX2;H0YDD4;E9PEJ4;A0A7P0TBK2;A0A7P0TA47;A0A7P0Z423;A0A7P0T9N8;A0A7P0Z459	DLAT
-1.3018	-1.19618	0.206166	0.708487	0.987317	0.596007	+	oe_kk47	1.42302	0.0377555	0.021341	2.24962	3.05738	A0A7P0TAQ9;Q8IXB1;A0A7P0Z431;A0A7P0TB97;A0A7P0TB83;A0A7P0T9B7;A0A7P0TB22;E7EP04;A0A7P0Z4F2;A0A494C1G5;A0A7P0T8Y3;H7C1G0	DNAJC10
-1.0148	-0.90179	-0.816173	0.926783	0.926453	0.87953	+	oe_kk47	5.1653	6.83439e-06	0	3.43394	30.5555	B3KWW1;A0A7P0TB70;O95786;A2A376;A0A7P0T9I8	DDX58
-1.64008	-0.4589	-0.290221	0.859537	0.995675	0.53399	+	oe_kk47	1.63117	0.0233792	0.0141132	0.505164	3.56984	A0A7P0TBA9;P19525;A0A7P0TAL9;A0A7P0Z4M0	EIF2AK2
-0.152877	-1.78451	-0.310713	0.671433	0.758011	0.818658	+	oe_kk47	1.34441	0.045247	0.0256807	1.20746	2.87484	A0A7P0TBC5;Q4KMQ2;A0A7P0TAW4;A0A7P0T8Y2;A0A7P0TAF4;A0A7P0TBI1;A0A7P0TBD5	ANO6
0.616851	0.599001	1.31347	-0.458722	-0.734179	-1.33643	+	oe_kk47	2.06869	0.00853709	0.00626415	-0.363411	-4.81775	A0A7P0Z497;P23284;A0A7P0TB45;A0A7P0T7U3	PPIB
-0.898563	-1.03767	0.749836	-0.553764	0.264747	1.47541			0.408005	0.390836	0.348258	0.0571537	0.961306	E7EX90;A0A804CDA6;A0A7P0Z4C3;Q14203;Q6AWB1;E7EWF7;C9JJD0;C9JKG6;E9PCY0;C9JZA4;C9JTE5;C9JJN7;C9J1B7	DCTN1;DKFZp686E0752
1.13398	0.601874	-1.8214	0.171677	-0.0187657	-0.0673644			0.0208346	0.953159	0.9703	0.00718498	0.0625054	O95630;A0A804HJS0;A0A804HHU9;A0A804HIJ2;A0A804HHV2;F5H5B9;A0A804HJC8;A0A804HL27;A0A804HKA6;A0A804HJ64;A0A804HII8;A0A804HI64;A0A804HIF8;C9JK83;A0A804HIV0;A0A804HKL2;C9JEK5;A0A804HL38;A0A804HJD9;A0A804HJE8	STAMBP
-1.27058	-0.74728	-0.653933	0.931393	0.776467	0.963935	+	oe_kk47	3.05273	0.000885666	0.0014485	0.365074	8.88736	Q9BTW9;A0A804HJY5;J3KR97;A0A804HLF8;A0A804HL62;A0A804HHW7;A0A804HLI2;A0A804HI57;A0A804HIN6;A0A804HIU1;A0A804HJ32;A0A804HKT8;A0A804HI02;A0A804HJ57;A0A804HIC0;A0A804HJU6;A0A804HL21;A0A0J9YVR1;A0A0J9YWI5;A0A804HKB9;I3L439;I3L0V3;I3L163;I3L143;I3L131;I3L3H4;I3L120;A0A0J9YXU4;I3L4D2;A0A804HJ99;A0A804HJL5;A0A0J9YVU1;I3L1S3;A0A804HK36;A0A0J9YYG2	TBCD
0.439548	0.90338	1.28816	-0.751268	-0.945923	-0.933899	+	oe_kk47	2.64169	0.00228197	0.00200708	-0.486918	-6.92532	P42704;A0A804HK30;A0A804HIG4;A0A804HKI2;A0A804HIN4;A0A804HL40;A0A804HKJ0;A0A804HI14;A0A804HLG8;A0A804HKR3;A0A804HJZ1;A0A804HIQ7;A0A804HI40;A0A804HHY9;A0A804HJH8;A0A804HJI0;A0A804HK02;C9JCA9;B8ZZ38;A0A804HIV5;A0A0C4DG06;A0A804HKX0;A0A804HKR5;A0A804HJA1;A0A804HKK7;A0A804HKX6;H7C3W8;A0A804HJG8;A0A804HLK8;A0A804HI44;A0A804HLL8	LRPPRC
-0.458061	-0.537349	-0.624099	1.49382	-0.904765	1.03045			0.664823	0.21636	0.152949	0.120852	1.46666	A0A804HL95;A0A804HJQ4;A0A804HJS9;A0A804HJ08;A0A804HJH7;Q9BSJ2;A0A804HI27;A0A804HK74;F2Z2B9;A0A804HLH6;A0A804HL05;R4GMM4	TUBGCP2
-0.921487	-0.180711	-1.41455	0.816669	0.799103	0.900972	+	oe_kk47	2.01867	0.00957922	0.00716075	2.07937	4.66144	J3KN01;A0A804HJ20;P55196;A8MQ02;Q5TIG5;H0Y7R8;H0Y948;H0Y8L4;F8W9I4;E9PFY5;H0Y8U8;H0YA98;H0Y9I0	MLLT4
1.71384	0.155472	0.249098	-1.0988	-0.156684	-0.862924	+	oe_kk47	1.14798	0.0711246	0.0394797	-0.279996	-2.4411	Q9HCC0;A0A804HJ24;A0A804HLJ9;A0A804HJ84;A0A804HKE8;A0A804HK37;A0A804HJ31;A0A804HL02;A0A804HJL2;A0A804HJC1;A0A804HHS4;A0A804HIH3;A0A0S2Z5R4;D6RDF7;A0A804HJW5;D6R9R1;A0A804HJW2;A0A0G2JM88;A0A804HKH3;D6RD67	MCCC2
0.695186	0.630186	0.888205	-1.76681	0.0103489	-0.457118	+	oe_kk47	1.28727	0.0516095	0.029252	-0.525831	-2.74556	A0A804HK09;A0A804HJY9;A0A804HJ70;Q53GS7;A0A804HJB3;A0A804HI94;A0A804HJ00;A0A804HIJ1	GLE1
0.102089	0.883324	1.29458	-1.49056	-0.395509	-0.393929	+	oe_kk47	1.40102	0.0397173	0.0224655	-0.589111	-3.00571	A0A804HJ86;Q9GZZ9;E7EQ61;E7EWE1;C9JRV9;C9J5W5;C9J0F6	UBA5
-0.333437	-1.34386	-0.812905	0.868283	0.390941	1.23098	+	oe_kk47	1.92196	0.0119685	0.00854363	0.195151	4.36994	E3W994;A0A804HJG7;J3KR49;A0A0U1RQI6;E7ERI8;E7EW49;O75122;B3KR06;E7ENG2;C9J668;D6RBU8;H7C4I5;H7C4X8	CLASP2
0.426016	1.04846	1.06556	-1.1501	-0.310836	-1.0791	+	oe_kk47	2.11376	0.00769556	0.00560324	-0.839595	-4.96192	A0A804HKX7;A0A804HJL6;Q9BT22;A0A804HKK4;A0A804HLB7;A0A804HKU4;A0A804HIG6;A0A804HJQ1;A0A804HKJ4;K7EID2;A0A804HHW1;K7EPU3;K7EQK1;A0A804HJE3;Q6GMV1	ALG1
-0.105695	0.778426	0.865234	0.804129	-1.521	-0.821098			0.608751	0.246178	0.180006	-0.185272	-1.35744	A0A804HJT7;B4DEQ0;A0A804HK05;A0A804HL84;Q16134;A0A804HL81;A0A804HJK8;A0A804HI80;A0A804HKB8;A0A804HI48;A0A804HI73;A0A804HK66;A0A804HI70	ETFDH
-0.454883	-0.721796	-1.41849	0.800014	0.963357	0.8318	+	oe_kk47	2.39327	0.00404324	0.00257226	1.42021	5.93392	A8MX75;A0A804HK53;E7EVE9;P18074;K7EKF3;A0A804HL97;A0A804HK75;K7EIT8	ERCC2
-0.772481	-0.423715	-1.36577	0.590627	1.16802	0.803314	+	oe_kk47	2.21417	0.00610703	0.00434483	0.341719	5.29519	A0A804HKH9;O00170;A0A804HKL7;A0A804HIX8;A0A804HJ38;V9GYQ3;E9PMH2;A0A804HKK3;A0A804HKP8;A0A804HJ46	AIP
0.773615	0.939035	0.99307	-0.685335	-0.903228	-1.11716	+	oe_kk47	3.66651	0.000215521	0.000672464	-2.01155	-12.7876	A0AV96;D6R9D6;B7Z8Z7;D6RBS9;D6REZ6;D6R9M7;D6RA49;D6RFL5;D6RCT1;D6RBP6;Q5T0W7;Q8TBY0	RBM47
0.531295	-1.48244	-1.0071	0.745152	0.27882	0.93427			0.957712	0.110227	0.0649208	0.102264	2.0457	A0AVT1;H0Y8S8;H0Y9U5	UBA6
0.897871	0.666138	1.1057	-0.572602	-1.02969	-1.06741	+	oe_kk47	3.02615	0.000941564	0.00141558	-0.699852	-8.74667	A0MZ66	KIAA1598
-0.592099	-1.03797	-0.945095	1.4127	0.642242	0.520226	+	oe_kk47	2.28095	0.00523661	0.00387004	0.229801	5.52645	A1L0T0;M0R026;M0QZX5;E9PJS0;E9PL44;M0R1B5;E9PNL1	ILVBL
-1.30247	-0.241912	-1.02226	0.808348	0.85886	0.899431	+	oe_kk47	2.23723	0.00579122	0.0042109	2.71353	5.37416	A1X283;G3V144;A0A1B0GUF2	SH3PXD2B
-1.19008	-1.13392	-0.25342	0.793702	0.81141	0.972304	+	oe_kk47	2.29286	0.00509495	0.00388758	1.67162	5.56855	Q86X10;A2A2F0;A0A0J9YW54	RALGAPB
-1.53088	-0.56646	-0.425093	0.904474	0.690916	0.927038	+	oe_kk47	2.0409	0.00910123	0.00689145	1.54302	4.73044	P04156;A2A2V1;X6RKS3	PRNP
1.98152	-0.0232307	-0.363907	-0.284963	-0.622342	-0.687081			0.64708	0.225382	0.161286	-0.269319	-1.4321	A2IDA3;P29372	MPG
-0.103855	-0.0174416	-1.12883	0.202605	-0.726224	1.77375			0.440291	0.362835	0.31092	0.0770588	1.02611	A2IDC6;Q13084;A2IDC7;Q4TT37	MRPL28
-1.07011	1.1764	-0.345203	-0.817197	1.27849	-0.222371			0.0607447	0.869471	0.91407	0.0624186	0.175148	A2RQR6;Q96EI5;J3KQY4;D6RHZ1;D6RIH3;D6RCE9;D6RD44;Q9H3H9	TCEAL4
-1.48877	-0.44201	-0.612419	0.692791	1.02807	0.822342	+	oe_kk47	2.12752	0.00745555	0.00538575	1.35257	5.00661	A3KMH1	VWA8
-1.25192	-1.16339	0.398098	1.24342	0.192935	0.580866			1.02254	0.0949424	0.0532716	0.321948	2.17813	A4D1E9;C9J8R7;C9JNI1;C9JEQ8	GTPBP10
-1.18168	-0.655499	-0.861216	0.945049	0.844873	0.908475	+	oe_kk47	3.49231	0.000321877	0.000563107	3.14607	11.5414	A5PLN9;D6RB83	TRAPPC13
-1.30927	-0.946345	-0.206716	1.19891	0.39506	0.868366	+	oe_kk47	1.83112	0.014753	0.0101294	0.277958	4.10828	A5YKK6;H3BVC9;H3BMZ2;H3BNB1;H3BR89;H3BMH0;H3BPF1;H3BT18;H3BTH2;H3BU44	CNOT1
0.649688	0.632043	0.68997	-1.31187	-1.26898	0.609146			0.972038	0.10665	0.0628259	-1.2832	-2.07479	A6NCC9;E9PME3;C9JHT9;C9JJV1;Q9Y5U2;E9PL88;C9JDU0	TSSC4
0.787154	0.787252	1.12777	-0.728498	-0.914936	-1.05874	+	oe_kk47	3.57785	0.000264332	0.000627027	-1.37169	-12.1381	A6NDG6;H3BV17	PGP
0.97968	0.811344	0.557861	0.0305793	-0.844129	-1.53533	+	oe_kk47	1.53855	0.0289368	0.0170772	-0.215238	-3.33625	A6NFX8;Q9UKK9;A6NJU6;A6NCQ0;H0YEY4;C9JYY9	NUDT5
0.315304	0.337711	-2.03465	0.421639	0.543779	0.416221			0.512227	0.307449	0.242792	1.0256	1.16863	A6NGJ0;P51808;F2Z328	DYNLT3
-0.815547	-1.36241	-0.31993	0.795993	1.2347	0.46719	+	oe_kk47	1.94884	0.0112502	0.00826358	1.98045	4.4496	A6NHN7;A6NHB5;Q14202;A6NL54	ZMYM3
-0.710364	-1.374	-0.536927	0.86833	0.756514	0.996446	+	oe_kk47	2.56646	0.00271356	0.00218876	1.1568	6.61115	A6NHR9;J3KTL8;A0A2R8YCU7;A0A2R8YE92;J3QSH1;J3KRK8	SMCHD1
-1.31475	-0.554154	-0.784488	0.884419	0.852206	0.91677	+	oe_kk47	2.84243	0.00143738	0.0019446	1.83189	7.8287	A6NIH7;K7EJU3;K7EN86;C9JSK0	UNC119B
0.405156	0.822816	0.911373	-0.966583	0.337267	-1.51003	+	oe_kk47	1.17662	0.0665856	0.0367845	-2.92894	-2.50254	E9PJK1;E9PRJ8;H0YDL9;H0YDJ9;E9PIF1;A6NMH8;P60033;E9PM31;H0YEE2	CD81
-0.809026	-1.02779	-0.871912	1.09977	0.692649	0.916312	+	oe_kk47	3.74976	0.000177926	0.000734177	1.42849	13.4278	A6NML8;K4DI95;C9J6U3;O60879	DIAPH2
0.953612	-1.17391	-0.410344	-1.03342	1.04613	0.617925			0.180002	0.66069	0.747307	0.0648041	0.473272	P09884;A6NMQ1;A0A7I2V2V3	POLA1
0.855275	-1.07368	-1.19674	0.274643	-0.121758	1.26225			0.531824	0.293884	0.228411	0.24849	1.20712	A6NMQ3;Q5T5H1;O43768;A0A1W2PRU0	ENSA
0.785265	0.822438	1.10363	-1.06373	-0.815271	-0.832331	+	oe_kk47	3.82866	0.000148368	0.000364865	-0.896662	-14.063	A6PVN5;Q15257;A0A804CD06;F6WIT2;Q68CR8;Q5T949;B7ZBQ0;C9IZ76;A6PVN6;A6PVN7;A6PVN8;H0Y6E5;B7ZBP9;B7ZBP7;A0A6Q8PH23;B4DDQ6	PPP2R4;DKFZp781M17165
0.0942253	0.233938	-1.99884	0.476952	0.620005	0.573718			0.702351	0.198449	0.136238	1.14689	1.5398	A6PW57;Q99755;A6PW58;A2A5X0;A0A7P0T808;O60331	PIP5K1A
-0.977078	-0.379312	-1.22927	0.652538	0.747435	1.18569	+	oe_kk47	2.33804	0.00459156	0.00357953	0.442954	5.73058	A6ZKI3;Q17RB0;Q9BWD3	FAM127A;FAM127C
0.00778414	0.300673	-1.9459	0.923412	0.269313	0.444721			0.677761	0.21001	0.147414	0.790768	1.49186	P49840;A8MT37;M0QYV0;A0A7I2V4Z1;A0A7I2V4Q6;A0A7I2V485;A0A7I2YQV9;A0A7I2V2P0;A0A7I2YQM8;A0A7I2YQJ1;A0A7I2V2J2;A0A7I2V2P9;A0A7I2YQG6;A0A7I2V3W5;A0A7I2V5S8;A0A7I2V5B3;A0A7I2V379;A0A7I2V589;A0A7I2V5Q2;A0A7I2V3H9;A0A7I2YQ81;A0A7I2V4Y3;A0A7I2YQA1;A0A7I2YQ76;A0A7I2V5M2;A0A7I2V4W7;A0A7I2V2N4;A0A7I2V4D4;A0A7I2V511;A0A7I2V2P8	GSK3A
0.564805	-1.26971	0.599303	0.719097	0.694347	-1.30784			0.0258626	0.942188	0.963211	0.00827916	0.0771788	A8MUM1;Q53HC9;F8WDS8;C9J0U9;D3YTH5;F8WDX0;F8WB12;C9JVR6	TSSC1
-1.82896	0.6196	0.687563	0.490487	0.543474	-0.512163			0.144083	0.717657	0.801701	0.0773099	0.388179	Q49AN9;F5H013;P62308;A8MWD9;C9JVQ0	SNRPG;SNRPGP15
1.50679	0.545222	-1.02064	0.270102	-1.13588	-0.165597			0.335546	0.4618	0.459544	-0.0698535	-0.813072	A8MXP9;P43243;A0A0R4J2E8;D6REM6;D6R991;H0Y8T4;B3KM87;D6R8Z5;D6RCM3;D6REK4;D6RE02;D6RIA2;D6RB45;D6RBK5;A0A1B0GX04;D6RBS2;D6RAY2;D6RAM9;D6R9F3;D6RBI2	MATR3
-0.724313	-0.945331	-1.02492	1.08784	0.972293	0.634428	+	oe_kk47	3.41346	0.000385958	0.000530892	2.82097	11.0161	A8MXV4	NUDT19
0.336548	-0.017388	-1.91892	0.63264	0.0734932	0.893622			0.650835	0.223442	0.159533	0.600581	1.43941	A9J4F5;O00488	ZNF593
1.45174	0.364414	0.696664	-0.996248	-1.01499	-0.50158	+	oe_kk47	2.00366	0.00991608	0.00735725	-0.429693	-4.61529	A9Z1X7;Q8IYB3;E9PCT1;M0R088;M0R1E7;M0QXG5	SRRM1
0.859957	0.946919	0.914125	-0.736198	-0.901609	-1.08319	+	oe_kk47	4.20828	6.19042e-05	0.000565445	-3.29232	-17.5498	B0I1T2;A0A3B3IU30;F8WEW9;J3KRL0;K7EIG7;J3QRN6;O94832	MYO1G
-1.09684	-1.17023	-0.332282	0.981189	0.658851	0.959311	+	oe_kk47	2.41873	0.00381303	0.00263618	1.25527	6.02964	B0QYD3;Q9UH17;P31941	APOBEC3B
-1.17167	-0.897779	-0.591763	0.922926	1.10193	0.636353	+	oe_kk47	2.9256	0.00118686	0.0014491	0.93913	8.23285	B0QYK0;Q01844;A0A0D9SFL3;C9JGE3;H7BY36	EWSR1
0.811637	0.993503	0.576655	-0.994325	-1.42533	0.0378564	+	oe_kk47	1.61336	0.0243579	0.0144052	-1.01631	-3.52418	B0QZ35;E9PC49;Q96EB6	SIRT1
-1.12713	-1.18455	0.0292329	0.222895	0.751367	1.30818	+	oe_kk47	1.40553	0.039307	0.0224446	0.939745	3.01626	B1AJQ6;Q86Y82	STX12
0.433001	-0.359971	-1.0504	1.65249	-0.894774	0.21965			0.312113	0.487402	0.498556	0.0946166	0.764084	B1AJY5;B1AJY7;O75832;B1AJY6	PSMD10
-0.639262	-0.804265	-1.22523	0.799141	0.766036	1.10358	+	oe_kk47	3.01424	0.000967743	0.00140872	0.323403	8.68432	B1AK88	CAPZB
0.727122	0.473579	0.633465	-1.34736	-1.22112	0.734315			0.836857	0.145594	0.0938554	-0.525935	-1.8038	B1AKM8;B1AKM6;H0Y7P7;Q9UG56	PISD
-0.45249	-0.948265	-1.24049	0.761617	0.866702	1.01292	+	oe_kk47	2.72728	0.00187379	0.00176161	2.36069	7.29852	H0Y6Y8;B1AL05;Q8N983;H0YBU8;M0R051	MRPL43
-1.43093	-0.207891	-0.683074	0.50369	1.42678	0.39143	+	oe_kk47	1.4819	0.0329686	0.0188982	0.414569	3.19784	B1ALA9;P60891;A0A2R8Y7H4;A0A6Q8PHI4;A0A6Q8PGP2;A0A6Q8PEU0;A0A6Q8PG82;A0A6Q8PHK9;B1ALA7;Q15244;A0A6Q8PGF9;A0A6Q8PG13;A0A6Q8PGX9;A0A0A0MRQ9	PRPS1
0.677547	0.112377	0.770018	-1.93149	-0.0746827	0.446235			0.623439	0.237991	0.172132	-0.784882	-1.38606	B1AMS2;Q14141	2022-09-06
0.958138	0.829894	0.917129	-0.632566	-0.990708	-1.08189	+	oe_kk47	3.65191	0.00022289	0.000664756	-5.81197	-12.6784	B1AP13;H7BY55;P08174;H3BLV0;B1AP15;A0A2R8YEC5;A0A2R8YDY3;A0A2R8Y4B4	CD55
0.773685	-0.958707	-0.691604	1.20685	0.698879	-1.0291			0.270631	0.536252	0.582692	0.0414696	0.675752	G3V4W0;B2R5W2;G3V4C1;B4DY08;G3V2D6;G3V251;G3V5X6;G3V5V7;G3V3K6;B4DSU6;P0DMR1;A0A0G2JPF8;A0A0G2JNQ3;B2RXH8;B7ZW38;O60812;G3V4M8;G3V2H6;B3KT61;Q86SE5;E5RG71;E5RJ39	HNRNPC
-0.106423	-0.058439	-1.8832	0.600228	0.847303	0.600527	+	oe_kk47	1.0587	0.0873575	0.0485056	0.880536	2.25298	B2WTI3;B2WTI4;K7EJU9;Q6NYC1	JMJD6
-0.621384	-0.944996	-1.12052	1.00806	0.698229	0.980605	+	oe_kk47	3.27449	0.000531508	0.000884381	2.76134	10.1451	B3KPU0;A0A087WVI1;Q96JY6;E5RGS7;A0A087WUQ1;H0YBP7;H7C1D1;C9JS55	PDLIM2
0.616323	0.793247	0.896942	-0.295881	-1.73932	-0.271307	+	oe_kk47	1.45126	0.0353785	0.0198998	-1.54494	-3.12433	C9J5N1;B3KSP9;Q9BTE6;L7N2F4;K7N799;K7EQ85	PTGES3L-AARSD1;AARSD1
-0.337358	-1.39506	-0.721352	0.329314	0.897096	1.22736	+	oe_kk47	1.80509	0.0156643	0.0104158	0.697386	4.03533	H0YMJ0;H0YLJ3;B3KTM8;Q9UBU8;H0YLV1;H0YMT8;H0YM21;H0YNE0	MORF4L1
-0.216384	-1.07772	-1.26469	0.789923	0.928039	0.840839	+	oe_kk47	2.19894	0.00632499	0.00458462	0.619094	5.24353	B4DDF4;B4DUT8;Q99439;H3BVI6;A0A087X271;A0A087X1X5;K7ES69;H3BQH0;U3KPS3;A0A087WV51	CNN2
1.59709	0.0162254	0.752063	-0.712507	-0.896411	-0.756458	+	oe_kk47	1.57519	0.0265956	0.0153818	-0.794502	-3.42755	B4DEE8;P16455	MGMT
1.08122	0.540372	0.778554	-1.56006	-0.690394	-0.14969	+	oe_kk47	1.65819	0.021969	0.0134106	-0.679397	-3.63979	H3BRY6;B4DVT3;B4DJL6;Q96SY0	VWA9
-0.540532	0.157305	1.90716	-0.558617	-0.848603	-0.116717			0.599531	0.25146	0.185133	-0.084966	-1.33947	O75390;B4DJV2;A0A0C4DGI3;H0YIC4;F8W4S1;H0YH82;F8VPA1;F8VTT8;F8VRP1;F8VX68;F8VRI6;F8VPF9;F8VR34;F8W1S4;F8W642;F8VZK9;F8VWQ5;F8VX07;F8VU34	CS
-0.54839	1.18292	1.38809	-0.679826	-0.602568	-0.740224			1.02875	0.0935944	0.0523906	-0.864635	-2.19093	B4DR61;P61619;F8W776;Q8TC24;Q9H9S3;H7C1Q9;C9JXC6;H7C069;A6NK38;F2Z2C7;A6NIF9;C9JJV4	SEC61A1;SEC61A2
-1.03744	-1.19734	-0.217652	0.956276	1.20031	0.295839	+	oe_kk47	1.80107	0.0158099	0.0105122	0.187576	4.02416	B4DR80;Q9Y6E0;H0Y630;Q5JV98;Q5JV99	STK24
0.722145	0.991886	1.00012	-1.01862	-0.749161	-0.946369	+	oe_kk47	3.92314	0.00011936	0.000402985	-1.13938	-14.8619	B4DUC8;Q13126;J3QSB7;F2Z2F3;F8WES2;A0A2R8Y4K0;J3KRN1	MTAP
-0.932924	-1.19427	-0.31154	1.4543	0.433944	0.550485	+	oe_kk47	1.76121	0.0173297	0.0109441	0.93553	3.91438	Q8NBY1;B4E0Y9;Q9P289;C9JJV0	STK26
-0.607321	-0.429174	-1.51112	0.85481	0.845291	0.847512	+	oe_kk47	2.14712	0.00712656	0.00521262	2.61514	5.07077	B4E1G1;E5RGY0;Q9BUN8	DERL1
-1.27846	-1.28471	0.455078	0.670143	0.83086	0.607085	+	oe_kk47	1.13425	0.0734091	0.0408869	1.33212	2.41182	B4E3T4;Q93062;H0YBU9;E5RJD7;H0YC46;E5RFP4;E5RJ31;Q6ZRY4	RBPMS
-1.10219	-0.554993	-0.462163	-0.266592	1.60898	0.776963	+	oe_kk47	1.14925	0.0709169	0.039472	0.273581	2.44381	B5MBZ0;Q9HC35	EML4
0.590637	-1.2249	-1.35213	0.641369	0.61504	0.729986			0.987984	0.102805	0.0597482	1.45552	2.10728	B5MCA1;Q96G28;B5MC35;B5MD16	CFAP36
0.83883	1.24674	-0.0272238	-1.01753	-1.28338	0.242571	+	oe_kk47	1.07114	0.0848907	0.047585	-0.188163	-2.27889	B5MCF9;O00541;B3KXD6;H7C267;H7BYY8	PES1
-1.64059	1.19846	0.497861	0.458229	-0.632635	0.118675			0.0134616	0.969479	0.980467	-0.0118478	-0.0407087	B5MDU6;Q9H6V9;C9JHU6;C9JUM0;B5MCU4;A0A0A0MSH6;B5MCE2;D3YTH1;B4DRG3	LDAH;C2orf43
-0.59632	1.36465	1.18377	-0.851518	-0.392017	-0.708565			0.95126	0.111877	0.0661217	-0.365439	-2.03264	E7EW69;B5ME97;Q9P0V9;E7EX04;C9JEW2;C9JNR7;F5GYV2;F5H1W3;F8WC85;C9JEQ7;F5H1F2	2022-09-10
-1.00477	-1.07691	-0.606808	1.08339	0.819386	0.785716	+	oe_kk47	3.3016	0.000499344	0.000902692	1.53142	10.3097	G3V195;B7WPE2;Q32P44;G3V1D0;H0Y3M3;H7C355	EML3
-0.40856	1.36308	1.05971	-0.275402	-0.505745	-1.23308			1.01912	0.095693	0.0535025	-0.29925	-2.17109	B7WPG3;C9IYN3;V9GYK2;Q8WVV9;H7C464;H7BXH8;C9JJZ7	HNRNPLL
0.468323	0.251994	-2.02022	0.263362	0.39719	0.63935			0.466629	0.341485	0.28352	0.762355	1.07856	C9J2P0;H7C061;B7Z306;P51965;A0A087X283;C9J180	UBE2E1;UBE2E2
0.723093	-0.351015	-1.87209	0.276707	0.501148	0.722153			0.584073	0.260572	0.194609	0.0993875	1.30932	B7Z6D5;Q96GQ7;A0A087X059;A0A087WYH5	DDX27
-0.0110153	-0.194305	-1.3917	0.32628	-0.392116	1.66286			0.648918	0.224431	0.160172	0.161924	1.43568	B7Z6J7;O75175;H0Y5X7;H7C3F5;A0A2H2FJL5;A0A2R8Y691;A0A2R8Y4W0;A0A2R8Y7Z8;H7C148	CNOT3
0.631453	1.26413	0.490061	-1.406	-0.0984245	-0.881223	+	oe_kk47	1.62257	0.0238468	0.0140841	-0.450202	-3.54776	B7Z7Q6;E9PNF7;P42785;E9PLY4;E9PQB5;E9PL85;E9PKN6;A0A7P0TB23;B3KR26;A0A7P0Z451;E9PL49;E9PNJ1	PRCP
1.60795	0.499712	0.333401	-0.987803	-0.621987	-0.83127	+	oe_kk47	1.76787	0.0170659	0.010842	-0.448207	-3.93257	B7ZC38;Q9NR46;B7ZC39;F8WFB9	SH3GLB2
-0.814364	-1.36293	-0.439303	0.821539	0.908093	0.88696	+	oe_kk47	2.5326	0.00293359	0.00222465	2.45247	6.47384	B7ZLQ5;P28370;A0A0A0MRP6	SMARCA1
-1.95479	0.178165	0.274192	0.816227	0.0513815	0.634825			0.585625	0.259642	0.193619	0.628975	1.31234	B8ZZ87;Q6P582;Q6NZ67;H7C173;H7C202;A0A494C0V9;H7BZ50	MZT2B;MZT2A
-1.63462	-0.431649	-0.379861	0.775625	0.8511	0.819407	+	oe_kk47	1.78252	0.0164998	0.0104773	1.80316	3.97281	B8ZZA8;B8ZZC5;C9JIJ6;B7Z509;H7C201	GLS
0.340222	-1.8459	-0.43966	0.768038	0.570157	0.607147			0.944224	0.113704	0.067842	1.16702	2.01841	Q9NZW5;B8ZZG1;C9J4Q3	MPP6
-0.978413	-0.846657	-0.902988	0.923609	1.02352	0.780933	+	oe_kk47	4.65258	2.22546e-05	0.000990826	3.28071	22.7136	B8ZZN6;P63165;B8ZZJ0;B8ZZ67;B9A032;G2XKQ0	SUMO1
1.83962	-0.17667	0.00789609	0.098572	-0.953293	-0.816121			0.702477	0.198391	0.13621	-0.241264	-1.54005	B8ZZQ6;P06454;B8ZZA1;B8ZZW7;H7C2N1	PTMA
-1.52198	-0.455693	-0.559428	0.873513	0.741842	0.921744	+	oe_kk47	2.10115	0.00792228	0.00590858	0.767008	4.92124	J3KMX2;B9EGA3;Q92925;J3QWB6;C9JYI7;J3QQL7	SMARCD2
-0.326904	-0.404696	-1.55583	1.12945	1.00481	0.153168	+	oe_kk47	1.41479	0.0384778	0.021765	0.707753	3.03799	B9ZVT1;Q8IXT5;E5RHG1;E5RJ83;E5RJV8	RBM12B
-1.26599	0.129382	-0.95994	-0.114655	1.08116	1.13004	+	oe_kk47	1.11915	0.0760064	0.0422428	0.403985	2.37979	C4AMC7;Q6VEQ5;A0A7I2YQU6;Q9NQA3;A8K0Z3;A8MWX3	WASH3P;WASH2P;WASH6P;WASH1;WASH4P
-1.95801	-0.0531197	0.222844	0.429294	0.734149	0.624846			0.796613	0.15973	0.106331	0.635786	1.72437	C9J0H3;C9JE06;C9J7K9;O15162;C9J9P4	PLSCR1
-1.00805	-0.637056	-0.89827	0.246414	0.958268	1.3387	+	oe_kk47	2.1283	0.00744218	0.00539016	0.73388	5.00913	C9J0I9;Q86WB0;F8WBD7;F8WDK5;F8WF13;F8WAU5	ZC3HC1
-0.402017	-1.03623	-1.18242	1.09995	0.747858	0.772857	+	oe_kk47	2.56188	0.00274233	0.00218386	1.33194	6.59245	C9J0J7;G5E9Q6;C9JQ45;C9J2N0	PFN2
-0.832675	-1.53173	0.302476	1.23604	0.420087	0.405801	+	oe_kk47	1.07553	0.0840369	0.0470179	0.154712	2.28806	C9J0K6;P30626;B4DHQ6	SRI
-0.352793	-1.59954	0.251775	1.10844	-0.355738	0.947859			0.725191	0.188282	0.128565	0.13069	1.58438	C9J126;P19022;C9JMH2;A0A6Q8PF58;A0A6Q8PHJ8;C9J8J8;A0A6Q8PG20	CDH2
-0.784228	-0.530378	-1.14179	0.242347	0.726058	1.48799	+	oe_kk47	1.81298	0.0153823	0.0102074	0.837758	4.05735	C9J1C6;Q9P0P0;F8WBU5;C9J391;H7C426	RNF181
1.14944	0.90079	-0.254724	-0.939372	-1.30942	0.453291			0.802802	0.15747	0.104087	-0.212811	-1.73656	C9J2Y9;P30876;C9J4M6;C9JMN3;C9JZW8	POLR2B
1.32939	0.818256	0.432665	-1.02608	-0.536995	-1.01724	+	oe_kk47	2.30846	0.00491519	0.00375114	-0.3554	-5.62405	C9J4Z3;P61513;M0R0A1;Q6P4E4;E9PEL3;M0R2L6;G5E9R3;A6NKH3	RPL37A
0.73212	-1.03084	-1.51424	0.62055	0.517322	0.675089			0.817988	0.152059	0.098568	1.70799	1.7665	Q16644;C9J8E1;C9JPW3	MAPKAPK3
-1.02144	-1.05141	0.61968	-0.45065	0.476598	1.42722			0.554758	0.278767	0.212266	0.141734	1.25205	C9JA08;Q96D46;C9J0B9;C9IZW9;C9K0C2;C9IY70	NMD3
-0.836824	0.220059	1.44473	-1.37035	0.534927	0.00746083			0.251561	0.560324	0.620981	-0.127353	-0.634343	Q9UNL2;C9JA28;C9J365	SSR3
-0.954472	-0.97659	-0.786683	0.745819	0.89682	1.07511	+	oe_kk47	4.06113	8.687e-05	0.00048	3.23199	16.1083	C9JAW5;C9JNU6;Q9Y241;A8MV81	HIGD1A;HIGD1C
-0.91729	-1.12054	-0.0604685	0.103038	0.327497	1.66776	+	oe_kk47	1.12142	0.0756101	0.0420863	0.476034	2.38461	C9JBI3;P78330	PSPH
-0.326292	-1.70779	-0.276135	0.612079	1.05432	0.643815	+	oe_kk47	1.45854	0.0347904	0.0193864	1.38093	3.1417	C9JG97;C9JEH3;Q13685;C9JTS3;H7C0R2	AAMP
-0.334083	-0.999378	-1.26993	0.805939	0.821446	0.976009	+	oe_kk47	2.4441	0.00359667	0.0026002	1.70806	6.1263	C9JEJ2;P49585;C9J050;H7C1T3;H7BZN1;C9J2E1;Q9Y5K3;C9JPY0;C9JVS0;F8WAZ5;F2Z2B1	PCYT1A
-1.70483	-0.178501	1.38446	0.353477	0.141425	0.00396137			0.136806	0.729783	0.812346	0.0459843	0.370518	C9JFE4;Q13098;A0A096LP07;A0A096LPJ3;A8K070;J3KSA5;J3QLT0;J3KRJ4;J3QS88;J3KTB0;J3QS84;J3QLE8;J3QL53;J3KRE8;J3QQX0	GPS1
-1.18978	0.883362	1.51558	-0.49766	-0.41208	-0.299421			0.419359	0.380751	0.335117	-0.277072	-0.98417	C9JFR7;P99999;CON__P62894	CYCS
0.865521	0.943526	0.847489	-0.75124	-0.590049	-1.31525	+	oe_kk47	2.87489	0.00133386	0.00155334	-3.20703	-7.98424	C9JGI3;P19971;A0A494C0L6;A0A494C1L9;A0A494C1N7;A0A494BZZ4;A0A494C0A4	TYMP
-0.175852	-1.48494	-0.773506	1.01911	0.958333	0.456861	+	oe_kk47	1.74873	0.0178349	0.0111582	1.58669	3.88042	C9JXQ7;C9JHH5;Q9Y6I9;C9JL43;C9JUC3;C9J7N0;A0A087WTU3	TEX264
-1.28909	-0.587436	0.538892	-0.711786	1.24388	0.805539			0.487301	0.325611	0.264219	0.139791	1.11949	C9JIF9;P13798;H7C1U0;H7C393;C9JLK2;F8WEH5;H0YFE5	APEH
-0.967292	-1.49331	0.160714	0.940415	0.674203	0.685274	+	oe_kk47	1.43843	0.0364393	0.0204651	0.486041	3.0938	C9JJ19;P82930	MRPS34
-0.474713	-1.74337	-0.00687988	0.979495	0.634431	0.611033	+	oe_kk47	1.30567	0.0494686	0.027996	0.884478	2.78689	C9JJU7;Q9NSI2	FAM207A
0.895353	-1.03362	-1.3509	-0.114532	0.747032	0.856665			0.577177	0.264742	0.198128	0.232047	1.29586	C9JLU1;P52434	POLR2H
-0.652149	-0.940649	-1.10716	0.944507	0.752889	1.00257	+	oe_kk47	3.52668	0.000297386	0.000590331	1.52552	11.7777	I3L2L5;I3L4Q0;C9JLW8;I3L317;I3L3A7	FAM195B
0.808152	0.834918	0.889793	-0.799254	-1.46537	-0.268238	+	oe_kk47	2.08331	0.00825449	0.00631379	-0.136812	-4.86414	P83731;C9JNW5;C9JXB8	RPL24
0.250016	0.755071	1.24945	-1.59893	-0.196007	-0.459606	+	oe_kk47	1.35552	0.0441042	0.0251013	-0.516819	-2.90032	C9JPE1;O43772	SLC25A20
1.29819	-0.272482	-0.105204	1.0694	-1.2251	-0.764793			0.288355	0.514808	0.545307	-0.0733725	-0.713766	C9JQD4;O43447;H0YEL5;A0A7I2YQS4;A0A7I2V5V0;A0A7I2V2H6;A0A7I2V343	PPIH
-1.59091	1.43203	-0.389636	-0.0748666	0.494151	0.129226			0.152683	0.703586	0.788808	0.0968971	0.40886	E7EUY3;E9PDR0;C9JQS9;E7EX59;P05166;E7ETT1;E9PEC3;E7ETT4;E7ENC1;F8WBI9;H7C5C9;C9JVW9;C9JAW3;C9JVY9	PCCB
1.71321	-0.333437	-1.01459	-0.394251	-0.605331	0.634403			0.0962761	0.801169	0.86706	-0.0491428	-0.269092	C9JQV0;Q9BRJ6;H7C0T1;H7C2R9	C7orf50
-0.610034	-0.497561	-1.46652	0.955907	0.866382	0.751824	+	oe_kk47	2.27542	0.00530371	0.00385959	1.11439	5.50702	C9JRJ5;Q9UGP4	LIMD1
1.70368	0.463255	-0.310117	0.0308828	-0.98875	-0.898952			0.857544	0.138821	0.0878604	-0.258014	-1.84481	C9JRZ6;Q9NX63;F8WAR4;A0A286YEX5	CHCHD3
1.02678	0.843933	0.808958	-0.945104	-0.566027	-1.16854	+	oe_kk47	3.16122	0.00068989	0.00118738	-4.7716	-9.48336	C9JS50;Q687X5	STEAP4
-1.87164	-0.0162288	0.051173	1.04593	0.604518	0.186249			0.839136	0.144832	0.0931665	0.402945	1.80831	C9JVE2;Q96GG9;C9J8R4;C9JRU6;C9J0B2	DCUN1D1
-0.505749	-1.14045	-0.954333	1.26438	0.523943	0.812208	+	oe_kk47	2.42604	0.00374939	0.00256369	0.219604	6.05737	P35998;C9JX88;C9JLS9	PSMC2
-1.6741	-0.736508	0.411473	0.91872	0.369995	0.710419			1.00208	0.0995222	0.0562899	0.914625	2.13611	C9JYN0;A0A0U1RQT9;Q16563	SYPL1
-1.9947	0.479799	0.0433819	0.288348	0.536803	0.646367			0.566097	0.271583	0.205233	0.597539	1.27422	C9JZG9;C9JZY6;P62256;H7C4M9;C9J8Q9	UBE2H
0.429007	-1.99691	0.0186528	0.451379	0.44514	0.652733			0.616256	0.24196	0.175877	0.898609	1.37206	D3DPS3;Q3KQU3;C9JIR3;H0YF21	RPRC1;MAP7D1
1.30844	0.983916	-0.367796	0.137988	-1.17005	-0.892498			0.922982	0.119404	0.0719175	-0.173599	-1.97558	D3YTB1;F8W727;P62910;D3YTI8	RPL32
-1.05625	-0.992606	-0.625843	1.0894	0.971573	0.613724	+	oe_kk47	3.09111	0.000810756	0.00150086	1.79388	9.09413	D6R938;E9PBG7;E9PF82;Q13557;H0Y9J2;H0Y9C2;A0A5F9ZHY2;A0A5K1VW76;A0A804HIC9;A0A5F9ZHM9;A0A5F9ZH21;A0A5F9ZHR5;D6RFJ0;A0A5F9ZH50;Q9UQM7	CAMK2D
1.56529	-0.309509	-0.78233	0.362527	-1.24297	0.406995			0.128856	0.743266	0.822926	-0.0683416	-0.351042	D6R9G1;D6RAD4;P50613;D6REC6	CDK7
-1.57801	-0.222026	-0.601495	0.60531	1.14222	0.654004	+	oe_kk47	1.6617	0.0217921	0.0134431	0.459993	3.64892	D6R9P3;D6RD18;D6RBZ0	HNRNPAB
-1.16096	-1.34043	0.22456	0.951735	0.765644	0.55945	+	oe_kk47	1.39522	0.0402513	0.022763	0.875276	2.99217	D6R9Z7;P15954	COX7C
-1.38692	-0.534956	-0.678782	0.683871	0.84705	1.06974	+	oe_kk47	2.42687	0.00374223	0.00256884	1.23952	6.06053	D6RB59;O60645;D6RBR9;H0Y995	EXOC3
1.84609	-0.159215	-1.18914	-0.0313628	-0.0868712	-0.379505			0.136452	0.730379	0.812625	-0.102367	-0.369654	D6RC04;Q9Y6G5;D6RJ90	COMMD10
-0.894461	-0.922707	-0.905262	1.07882	0.906863	0.736744	+	oe_kk47	4.28173	5.22721e-05	0.000635294	2.05977	18.3158	D6RCD0;Q8NBQ5	HSD17B11
0.644345	-0.952966	-1.50878	0.76315	0.889152	0.165103			0.821903	0.150694	0.0976344	0.604324	1.77423	Q9H173;D6REA1;D6RIU8	SIL1
-0.592516	-0.659138	-1.34095	0.89292	1.14526	0.554426	+	oe_kk47	2.37801	0.00418784	0.00295954	0.336188	5.87713	D6RGI3;D6RER5;Q9NVA2;D6RDU5;H0Y961;D6RDP1;D6R9Y6;H0Y9G8	2022-09-11
0.951013	0.993259	0.119824	-1.40443	-1.00238	0.342717	+	oe_kk47	1.07819	0.0835238	0.0466148	-0.224284	-2.29361	D6REX3;O94979;D6RHZ5;H7BXG7;H0YAB3;H0Y8V7;H0Y9K1;H0Y9T9;H0Y8W8;H0YAF5;D6RE64;D6RCQ9;D6RBT0;D6RHE8;H0Y9V3	SEC31A
0.0547639	-1.76087	-0.162532	-0.0109852	0.712546	1.16708			0.868567	0.135342	0.0844689	1.21658	1.86673	P27707;D6RFG8;D6RCP9	DCK
-0.628207	-0.748314	-1.26127	0.722594	1.17945	0.735751	+	oe_kk47	2.69725	0.00200794	0.00197294	1.15812	7.16563	D6RFH4;H3BUX2;O43169;J3QR91	CYB5B
0.73724	-1.41727	0.146751	0.535372	-1.03537	1.03328			0.147762	0.711603	0.796729	0.142208	0.397052	D6RGY8;D6RFI3;E7EQR8;Q9GZM5;H0Y9A1	YIPF3
-1.11098	-1.18207	0.642009	-0.267467	0.810272	1.10823			0.68772	0.205249	0.142478	0.503556	1.51127	H0YA18;D6RGX2;Q9NUQ7	UFSP2
-1.00899	0.341032	-1.49118	0.669294	0.950143	0.539706	+	oe_kk47	1.20467	0.0624209	0.0341479	1.12148	2.56329	D6RHI9;O00584;A0A804HKZ2;A0A804HJZ7;H0YAE9;D6REQ6;A0A087WZM2;J3QQ64;A0A804HJ89	RNASET2
0.632729	1.43417	0.53472	-0.866165	-0.848614	-0.886843	+	oe_kk47	2.43289	0.00369071	0.00257402	-0.67912	-6.08342	D6RIY6;Q06265;D6R905;D6RA17;H0Y9L5;D6RAP4	EXOSC9
0.200579	0.119634	1.82703	-0.630323	-0.931075	-0.585843	+	oe_kk47	1.18769	0.0649098	0.0355095	-0.648818	-2.52645	E1CEI4;P48506;A0A0C4DGB2;A0A2R8YEL6;D6RGF8;B4E2I4;A0A2R8Y648	GCLC
1.07417	1.33124	-0.949586	-1.03984	-0.160781	-0.25521			0.556389	0.277722	0.211879	-0.172298	-1.25524	E5RFP0;Q8WVJ2	NUDCD2
0.41701	0.0306258	1.13612	0.581673	-1.73522	-0.430206			0.639698	0.229246	0.164482	-0.195143	-1.41772	E5RG17;Q6P1N9;G5EA19;U3KQS5;E5RGF2;A0A0D9SGD3;H0YBX2;E5RG62;E5RK70;E5RID7;E5RH86;E5RI69;E5RJY6	TATDN1
-0.167937	0.016761	-1.74306	1.30054	0.477979	0.115712			0.892994	0.12794	0.078066	0.280394	1.91545	E5RGS2;Q9H6H4	REEP4
-1.58927	-0.508384	-0.0110046	0.849779	1.22152	0.0373627	+	oe_kk47	1.135	0.0732825	0.0408497	0.478859	2.41343	O60925;E5RGS4;D6RGG5	PFDN1
0.512309	-1.57359	-0.892482	0.974476	0.355998	0.62329			0.953003	0.111429	0.0656605	0.331572	2.03616	Q15369;E5RHG8;R4GMY8	TCEB1
-0.886511	-1.22883	-0.548223	0.741446	0.90389	1.01822	+	oe_kk47	2.95221	0.00111632	0.00135614	0.444908	8.3661	E5RIA4;E7ETB3;Q9ULA0;E7EMB6;B9ZVU2;F8WAN0;C9JBE1;E7EPX3;E5RJ35;C9JRG3;C9J1E2	DNPEP
1.59495	0.3782	-0.983422	-0.562522	0.471338	-0.898546			0.317401	0.481503	0.48868	-0.0900332	-0.775191	E5RIW3;E5RJD8;O75347;E5RHG6;E5RIX8;A0A494C144	TBCA
-0.279968	-1.12584	-1.04216	0.291971	1.35961	0.796385	+	oe_kk47	1.78788	0.0162975	0.0104651	0.165723	3.98759	E5RJR5;P63208;E7ERH2;F8W8N3;E5RGM3;E5RHM3;E5RGM4	SKP1
-0.390309	1.38662	0.560582	-1.61493	0.00643695	0.0516002			0.621382	0.239121	0.173416	-0.132554	-1.38205	Q7L5N1;E7EM64;H7C3T0	COPS6
0.615161	-1.15422	-1.4116	0.78767	0.58718	0.575803			0.94975	0.112266	0.066337	1.28646	2.02958	E7EMP6;Q96FZ2;D6R9T3;D6RGK7;D6RAZ3;D6RAI0	HMCES
0.476875	1.06054	1.1115	-0.790746	-1.10336	-0.754804	+	oe_kk47	2.79815	0.00159166	0.0018745	-0.830967	-7.62091	J3KMY5;G3V3E8;E7EMS2;G3V3D1;P61916;G3V2V8;H0YIZ1	NPC2
0.811268	-0.672595	-1.70717	0.222048	0.575139	0.771315			0.629242	0.234832	0.169399	0.320239	1.39736	E7EV99;E7ENY0;P35611;A0A804HL01;H0Y9H2;A0A0A0MSR2;D6RF25;D6RJE2;H0YFD8;D6RAH3	ADD1
-0.485387	-1.07718	-1.0143	0.385261	0.98334	1.20826	+	oe_kk47	2.28992	0.00512956	0.00388054	0.246138	5.55814	E7ES33;E7EPK1;Q16181;G3V1Q4;A0A0U1RRE1;A0A0U1RRM2;Q5JXL7;A0A0U1RRH9;A0A5F9ZGZ7;A0A0U1RRD1;Q6ZU15	2022-09-07
0.444276	-0.76171	-1.63507	0.408934	0.463206	1.08036			0.951682	0.111768	0.066098	0.29877	2.03349	E7EPN9;Q9Y520;A0A2R8Y7F4;A0A2R8YET2;H7C5N8;A0A0A0MS30;A0A2R8Y424	PRRC2C
-0.620991	-0.656364	-1.18719	0.613251	0.340674	1.51063	+	oe_kk47	1.838	0.0145211	0.00994185	1.29985	4.12771	E7EPT4;P19404	NDUFV2
0.151064	1.65526	0.577553	-0.82163	-0.716506	-0.845739	+	oe_kk47	1.61832	0.0240813	0.0143073	-0.378316	-3.53687	E7EQ69;Q9GZZ1;C9J5D1;A0A087WWJ2;C9JZU6;B0AZT5;F8WCK0;C9J5J3;A0A0D9SF32	NAA50
0.638445	0.423913	-0.142517	1.28053	-1.50751	-0.69286			0.288084	0.515129	0.545792	-0.161985	-0.713189	Q15363;E7EQ72;F5GX39	TMED2
-1.38654	0.50243	1.5692	-0.146105	0.0436181	-0.582604			0.198879	0.632588	0.716845	-0.0766023	-0.51675	P15311;E7EQR4;E9PNP4	EZR
1.44814	-0.58011	0.898865	-1.0591	-0.79334	0.0855473			0.778556	0.166511	0.111466	-0.350321	-1.68888	E7ERS3;Q86VM9;H3BRH3;H3BP01	ZC3H18
-0.285624	-0.476054	-0.753379	0.644575	-0.855083	1.72556			0.593755	0.254827	0.188602	0.106284	1.3282	E7ESD2;Q641Q2;F8W7U3;A0A087WYF6	FAM21A
-1.02313	-0.84258	-0.859377	0.853228	1.04728	0.824587	+	oe_kk47	4.43759	3.65098e-05	0.000782609	1.01192	20.0513	J3KQY1;E7ESL0;Q9NWU5	MRPL22
-0.121272	-0.929036	1.87003	-0.233365	0.153355	-0.739716			0.248393	0.564426	0.626063	-0.134014	-0.627409	E7ESY4;Q13330;H0Y4T7;F8W9Y9;H7C3F3	MTA1
-0.917955	-1.09006	-0.683526	0.970542	1.05933	0.661666	+	oe_kk47	3.35586	0.000440697	0.00050108	1.37552	10.6469	E7ET40;P00749	PLAU
0.701609	1.06541	0.897394	-1.25373	-0.720677	-0.69001	+	oe_kk47	2.96214	0.00109109	0.00135826	-1.29293	-8.41627	E7ET49;Q8NCG7	DAGLB
-1.00202	-0.964485	-0.725337	1.1845	0.770064	0.737278	+	oe_kk47	3.36147	0.000435041	0.000503254	0.568886	10.6823	E7ETE2;P12081;A0A6Q8PFF2;A0A6Q8PHA5;A0A6Q8PF47;B4DDD8;A0A6Q8PHE3;A0A6Q8PF07;B4E1C5;A0A6Q8PFG9;A0A6Q8PFN6;A0A6Q8PHQ0;D6RF05;A0A2R8YCI2;A0A2R8YFR1	HARS
-1.87866	-0.0885143	0.131467	0.148597	0.855488	0.831619			0.838243	0.14513	0.0933849	0.283696	1.80654	H0Y9G6;E7ETU7;P09001;E9PF06;D6RC14;D6RBQ5	MRPL3
1.11479	-0.508467	0.180526	1.20634	-0.886082	-1.10711			0.235912	0.580882	0.651374	-0.135663	-0.599933	Q8TED1;E7ETY7;J3KNB5	GPX8
0.62248	0.923206	1.15347	-0.895231	-0.92641	-0.877517	+	oe_kk47	3.50887	0.000309835	0.000575682	-1.18633	-11.6547	E7ETZ4;Q9Y6E2;B5MCH7;B5MCE7;Q75MG1;E9PFD4;C9JF98;E7EMS9;E9PFE3;F8WDX8	BZW2
-0.262159	0.0851513	0.655939	0.998204	0.358335	-1.83547			0.130561	0.740353	0.820818	-0.0288531	-0.355236	G3V2E7;F8W6L3;G3V3H3;G3V5R9;E7EVH7;Q07866;G5E9S8;G3V2P7;H0YG16;H0YJU9;H0YJL0;H0YJT3;H7C4M1;H0YGB8	KLC1
-0.145055	0.632363	1.30267	-0.00833337	-0.0861673	-1.69548			0.798055	0.159201	0.105838	-0.335765	-1.72721	E7EVJ5;Q96F07;H7C229;E7EW33;A0A087WWZ1;A0A087WVE1;A0A087WTQ3	CYFIP2
-1.48193	-0.32093	-0.723228	0.994538	0.676598	0.854951	+	oe_kk47	2.05553	0.00879974	0.00646106	1.08733	4.77623	E7EVQ6;Q14534;H0YBN7;E5RJH9	SQLE
0.825127	0.34139	0.443968	-1.96269	-0.0375728	0.389783			0.658399	0.219584	0.156296	-0.285342	-1.45414	E7EW05;Q9NVU7;F8W8T7;D6RC74	SDAD1
0.0806147	-0.616529	0.34966	-0.870633	-0.731442	1.78833			0.0466552	0.898142	0.931957	0.0207481	0.136337	E7EWR4;P33240;E9PID8;A0A0A0MT56	CSTF2
1.4748	0.551407	0.454785	-0.564307	-1.24011	-0.676575	+	oe_kk47	1.89085	0.0128573	0.00915358	-0.535537	-4.27907	E7EX17;P23588;F8VX11;F8VP89;F8W0K0;F8VSC7;F8VRU1;F8VYE9	EIF4B
0.817053	0.933996	0.968714	-0.756005	-1.08665	-0.877104	+	oe_kk47	4.14932	7.09055e-05	0.000526829	-1.19496	-16.9577	E9PB90;P52789;P52790	HK2
0.0577328	1.03128	1.32437	-0.821026	-0.45171	-1.14064	+	oe_kk47	1.69211	0.0203184	0.0127143	-0.240746	-3.72879	E9PCR7;Q02218;A0A0D9SFS3;E9PDF2;E9PFG7;C9J4G7;Q9ULD0	OGDH
-0.179211	1.48989	0.508911	-1.07048	0.354353	-1.10346			0.823836	0.150025	0.0972898	-0.296001	-1.77805	E9PDF6;O43795;H7C2Y7;E7EQD9;C9JYW1;A0A0U1RRI3;C9JUP5;C9K0I9;Q9UBC5	MYO1B
-0.482463	-1.30018	-0.861583	0.861622	0.851211	0.931391	+	oe_kk47	2.75415	0.00176137	0.0017931	2.12374	7.41928	E9PER6;O15530;Q6A1A2	PDPK1;PDPK2P
-0.963069	-0.975777	-0.710777	0.542791	1.27832	0.828511	+	oe_kk47	2.80501	0.00156671	0.00188964	0.917596	7.65276	E9PF17;P13611;Q86W61;D6RGZ6	VCAN
-0.459719	-1.12734	-1.02969	1.13856	0.55384	0.924351	+	oe_kk47	2.53375	0.00292584	0.00222707	0.3853	6.47844	E9PF19;Q9Y4P3;Q96E41;A0A087WXC6;F8WCR3;F8WDI9	TBL2
0.28034	-1.89553	0.702755	0.826923	-0.228392	0.313907			0.285059	0.51873	0.551999	0.378142	0.706729	O00459;E9PFP1;A0A7I2U3A3	PIK3R2
-1.35919	-0.397167	-0.779977	0.652795	0.636403	1.24714	+	oe_kk47	2.0979	0.00798178	0.0060016	0.288038	4.9108	E9PFR3;Q14738;H0Y8C4;H0YJ35	PPP2R5D
-0.925832	-0.236445	-1.37208	0.715518	1.04776	0.771079	+	oe_kk47	2.08955	0.00813673	0.0063389	1.63711	4.88407	E9PG40;P05067;H7C0V9;A0A0A0MRG2	APP
-0.122536	1.18969	1.23478	-0.522263	-0.582761	-1.19691	+	oe_kk47	1.44236	0.036111	0.020436	-0.71258	-3.10313	E9PGT1;Q15631;H7C1D4;A0A0J9YVW2	TSN
0.428089	0.866706	1.26972	-1.20929	-0.86823	-0.486992	+	oe_kk47	2.22668	0.00593362	0.00427478	-0.274501	-5.33792	Q15418;E9PGT3;Q5SVM6;F2Z2J1;Q15349;E9PAN7;B7Z3B5;E9PMM7;D6R910;Q5SVM7;D6RA62;D6RE03;D6RHW7;V9GXZ1;E7ERL6;A0A669KBJ4;Q9Y2H9;Q6P0Q8;O60307;Q96GX5;O15021	RPS6KA1
0.821303	0.869973	0.663529	-1.108	-1.37287	0.126068	+	oe_kk47	1.55152	0.0280854	0.0164018	-0.283801	-3.3684	E9PGT6;Q99627;H7C3S9;F8WEF2	COPS8
1.20389	0.897578	0.55127	-1.11962	-0.845115	-0.687995	+	oe_kk47	2.83576	0.00145962	0.00192593	-1.36889	-7.79707	E9PGZ1;E7EX44;C9J813;Q05682;A0A6Q8PGI1;C9JEK3;C9JE79;F8WE61	CALD1
0.660156	1.74468	-0.617095	-0.589607	-0.406592	-0.791539			0.796142	0.159904	0.106427	-0.0795561	-1.72345	E9PHA2;Q15003;C9J470;C9JZP1;H7C415	NCAPH
-1.156	0.0857704	-1.2657	0.436984	0.775758	1.12319	+	oe_kk47	1.51087	0.0308411	0.0179122	0.742078	3.26821	E9PHI4;O94901;C9JK55;H7C019;H0Y6N5;H0Y742;C9K051;H7C2K3;C9JR15;C9JS54;C9JJU6	SUN1
-0.868332	-0.574422	-0.947378	1.62579	0.178202	0.586138	+	oe_kk47	1.63344	0.0232573	0.01413	0.376832	3.57567	E9PHV5;P28290;E7EUL7;H7BZ26	SSFA2
1.46602	0.106786	0.132049	-1.08679	-1.16045	0.54238			0.728538	0.186837	0.12733	-0.241556	-1.59092	Q13206;E9PIF2;A0A3B3ISR7	DDX10
-0.708072	0.26211	1.91438	-0.404176	-0.399048	-0.665194			0.564169	0.272792	0.206331	-0.449275	-1.27045	E9PJ55;Q9NUJ3	TCP11L1
-1.33331	-1.12331	0.0710556	0.603899	0.848643	0.933019	+	oe_kk47	1.62237	0.0238578	0.0140757	1.39335	3.54724	H7C5A7;E9PJN0;O14734;H0Y698;Q9BR14;E9PMC4;E9PIS4;E9PRD4;A0A494C0N6	ACOT8
1.3439	0.286454	0.589588	-1.38454	-0.916888	0.0814885	+	oe_kk47	1.2975	0.0504081	0.0283793	-0.184518	-2.76851	H7BXH2;E9PKF6;Q5H9R7;H0YEN2;E9PQP7;E9PNN8;H0YDW1;E9PK08;E9PJD8;E9PKG4	PPP6R3
-1.03943	-0.927101	-0.73626	0.673984	1.06787	0.960933	+	oe_kk47	3.59251	0.000255558	0.00063388	0.775614	12.2432	E9PKG1;Q99873;E9PIX6;E9PQ98;H0YDE4;E9PNR9;E9PMW9;Q9NR22;E9PMZ2	PRMT1
-0.748304	0.924718	0.457337	-1.34508	-0.454744	1.16608			0.181064	0.659077	0.74556	-0.0222766	-0.475739	E9PKP7;P17480;E9PMM2;E9PLT2;H0YDH7	UBTF
0.79995	-1.96606	0.210104	0.549129	0.385404	0.0214746			0.303082	0.497643	0.515482	0.534772	0.745038	E9PL17;Q92989;E9PKV5;E9PJM4	CLP1
-1.71392	0.13007	0.698326	1.18801	-0.375745	0.0732597			0.274184	0.531883	0.574626	0.171406	0.683406	E9PLD2;Q9H019;E9PPQ0;C9JF50;E9PPF9;E9PLU1;E9PRK5	MTFR1L
1.39066	0.0424324	0.412157	-0.245799	-1.68144	0.0819969			0.846906	0.142264	0.0908331	-0.322617	-1.8237	E9PLI6;E9PS76;Q8N9N8;E9PS30;E9PQD0;E9PNH5	EIF1AD
1.03799	0.796692	0.865455	-0.730838	-1.16584	-0.803463	+	oe_kk47	3.53061	0.000294707	0.00059335	-0.523624	-11.805	P55786;E9PLK3;A0A7I2V3W8;A0A7I2V389;E9PPZ2;A6NEC2;A0A7I2V604;H0YDG0;E9PP11;A0A7I2V5D4;E9PJ74;H0YCQ5;E9PPD4;E9PRQ5;E9PJY4;A0A7I2V5M8;E9PI82;A0A7I2YQS3;E9PJF9	NPEPPS
-0.590509	0.262867	-1.75679	0.608752	0.872881	0.602803	+	oe_kk47	1.10362	0.0787735	0.0438089	0.954818	2.34699	E9PLV6;E9PPZ9;O43292;E9PLG8;E9PM11;E9PM94;E9PQ31	GPAA1
0.93771	-0.0504857	1.46093	-0.580285	-0.678492	-1.08938	+	oe_kk47	1.53697	0.0290422	0.017058	-0.581467	-3.33234	E9PM62;E9PKJ0;E9PJW4;E9PQK1;H0YCG9;Q5T9L3	WLS
1.20117	-0.554928	-1.37816	-0.606245	0.460453	0.877704			0.215625	0.60866	0.690212	0.165235	0.55469	E9PM92;O00193;E9PRZ9;E9PQA1	C11orf58;SMAP
-1.66948	-0.173706	-0.51246	0.586061	0.811181	0.95841	+	oe_kk47	1.55339	0.0279647	0.016357	1.04872	3.37305	E9PMG1;Q96D71;H0YDT0;F2Z3L2;H0YE89;H0YCR2	REPS1
-2.02265	0.242963	0.287652	0.52841	0.59048	0.373143			0.578995	0.263636	0.197049	0.955465	1.29941	E9PMQ6;Q00613;E9PI02;A0A087X1F9	HSF1
0.757579	0.693736	1.13162	-0.526056	-0.659569	-1.39731	+	oe_kk47	2.32282	0.00475532	0.00378229	-0.488203	-5.67559	E9PN81;Q8TDP1	RNASEH2C
-0.883139	-0.684574	-1.02067	0.612507	0.550655	1.42522	+	oe_kk47	2.35349	0.00443108	0.0033032	2.26452	5.78688	E9PNM1;P37268;A0A1W2PQ47;E9PJG4;E9PS69;E9PQ90;E9PNJ2;E9PSH1	FDFT1
0.823667	1.08551	0.641677	-0.399347	-0.716904	-1.4346	+	oe_kk47	2.16179	0.00688985	0.00504435	-0.817141	-5.11921	E9PNW8;Q8WVX9	FAR1
0.292498	-1.47768	-1.03194	0.852658	0.745778	0.618693	+	oe_kk47	1.29297	0.0509366	0.0287201	0.776162	2.75833	E9PPW7;O00217;E9PN51;F8W9K7;E9PKH6	NDUFS8
0.842233	0.580007	0.602712	-1.6679	-0.78899	0.431939			1.03145	0.0930144	0.0521726	-1.10808	-2.19651	E9PQ61;O75152;E9PBY7;A0A1W2PPR9;A0A1B0GTU1;A0A494C0C4	ZC3H11A
-1.40041	-0.474896	-0.636697	1.06804	1.05719	0.386771	+	oe_kk47	2.00055	0.00998734	0.00734079	0.575559	4.60578	E9PQY2;Q9NQP4	PFDN4
0.419418	-1.12998	0.129606	1.64236	-0.163423	-0.897987			0.163314	0.686572	0.77466	0.0211309	0.434149	E9PRG8;E9PLD3;A0A494BXY3	C11orf98
1.09877	0.577496	0.980683	-0.660974	-1.18322	-0.812753	+	oe_kk47	2.87924	0.00132057	0.00156671	-0.662278	-8.0053	E9PS17;Q96KG9;E9PK59;E9PPN3;H0YCI6;H0YDH0	SCYL1
-0.669775	-0.95358	-1.08834	0.969453	0.865662	0.87658	+	oe_kk47	3.84032	0.000144438	0.000368601	3.72627	14.1593	F2Z2U4;H0Y4W2;Q9Y4A5;A0A2R8YFJ4;C9K0N1	TRRAP
1.32228	0.658952	0.618844	-1.13794	-0.54326	-0.918879	+	oe_kk47	2.42325	0.00377355	0.00255856	-1.90771	-6.04677	H0Y6J0;Q4TT34;F2Z2X0;O00746;A0A087WVT9;A2IDC9;F2Z297	NME4
0.873843	0.897739	0.95796	-0.879915	-1.04306	-0.80657	+	oe_kk47	4.78422	1.64354e-05	0	-1.85415	-24.5128	F2Z3J9;Q14914;Q5JVP2;F6XGT7	PTGR1
0.405736	-1.09692	-1.35845	0.683915	0.243313	1.12241	+	oe_kk47	1.0606	0.0869761	0.0484497	0.539342	2.25693	P00813;F5GWI4;F5GXW0	ADA
-1.50596	-0.523256	-0.455128	0.960053	1.05171	0.472585	+	oe_kk47	1.90205	0.01253	0.00876674	1.56393	4.31163	F5GXX5;P61803;F5H895;A0A0B4J239	DAD1
0.554752	0.209877	1.62779	-0.564605	-0.981956	-0.84586	+	oe_kk47	1.63903	0.0229599	0.013951	-0.690972	-3.5901	H0YGR4;F5GYG5;Q9Y3B8;H0YG54;F5H784;F5H7P1;H0YF66;Q9BTR4;F5H6P8;H0YG37	REXO2
0.959217	0.0939916	1.35789	-1.04466	-1.00126	-0.365175	+	oe_kk47	1.68618	0.0205978	0.0129736	-0.541735	-3.71313	F5GYJ5;Q9NX18;F8W679;M0QYN2;F5GXW4;M0R060;F5H5T6;F5H8E2	SDHAF2
-1.04621	0.651335	1.6003	-0.0633241	-0.93438	-0.207721			0.417483	0.382399	0.33705	-0.139991	-0.980397	F5GYQ1;P61421;J3QL14;R4GN72;H3BQB4;H3BSG7;H3BQJ1	ATP6V0D1
0.892647	0.941854	0.888738	-0.718542	-1.01867	-0.98603	+	oe_kk47	4.32618	4.71867e-05	0.000679245	-6.21029	-18.7951	F5GZQ4	LDHA
-1.90274	0.00677345	0.177762	0.118537	0.964785	0.634883			0.739017	0.182382	0.124127	0.483886	1.61141	F5H1D6;Q07864;A0A5F9ZHD6;F5H7E4	POLE
-0.601167	-1.21723	-0.866617	0.892	0.933983	0.859031	+	oe_kk47	3.24351	0.000570808	0.00104519	4.2871	9.95992	F5H2U8;F5H2A4;P52926;F5H6H0	HMGA2
0.863676	0.843752	1.02247	-0.824504	-0.924128	-0.981266	+	oe_kk47	4.81889	1.51743e-05	0	-0.67701	-25.0096	V9GYY3;F5H2F4;P11586;V9GZ78;A0A494C1T2	MTHFD1
0.842764	0.799299	1.08134	-0.944837	-0.829311	-0.949259	+	oe_kk47	4.33573	4.61604e-05	0.000687898	-0.781675	-18.8997	F5H365;Q15436;G3V4V1;G3V1W4;G3V3G5;G3V2R6;G3V5X8;G3V4Q2;G3V5K1	SEC23A
0.811356	-0.0619081	-0.153684	1.44858	-0.770997	-1.27335			0.168237	0.678833	0.765989	-0.0761636	-0.445761	F5H3Y4;Q8IY37	DHX37
-0.952649	-0.913846	-0.860932	0.776938	1.04703	0.903456	+	oe_kk47	4.6022	2.49919e-05	0.00093913	2.20924	22.06	F5H442;Q99816;J3QRU6;J3QKS4	TSG101
0.394754	-1.57136	-0.629399	0.10203	0.343708	1.36026			0.811897	0.154207	0.101034	0.614444	1.75448	Q9H9H4;F5H4M0;F5H1F6	VPS37B
-1.07547	-0.259602	-1.17457	0.392479	1.03459	1.08257	+	oe_kk47	1.99166	0.0101939	0.00764015	0.335085	4.57866	F8VY35;F5H4R6;P55209;F8W0J6;H0YIV4;F8W020;F8VUX1;F8VXI6;F8VVB5;H0YH88;H0YHC3;B7Z4K9	NAP1L1
0.478946	0.724037	0.997807	0.139292	-0.673366	-1.66672	+	oe_kk47	1.26709	0.0540642	0.0305158	-0.442802	-2.70055	H0Y8R1;F5H5I6;H0YAK1;Q12849;H0YAM1	GRSF1
-1.00716	-0.985447	-0.631035	0.778155	1.3151	0.530388	+	oe_kk47	2.58391	0.00260669	0.00221112	0.37921	6.6829	F5H5P2;P12694;F5GXU9;H0YH31	BCKDHA
-0.335756	-1.31866	-0.935468	0.740071	0.839172	1.01064	+	oe_kk47	2.3621	0.0043441	0.00323485	1.48326	5.81846	F5H5U2;Q8NHQ9;E7EX41;F5H2I2;F5H735	DDX55
2.01067	-0.104176	-0.329556	-0.599013	-0.469446	-0.508478			0.635007	0.231736	0.166891	-0.163364	-1.40859	F5H658;Q14562;K7END7;K7EJH9	DHX8
-1.45177	-0.566576	1.44904	0.593859	-0.255876	0.231327			0.159475	0.692668	0.779913	0.195114	0.425051	F5H6B6;F5H8A0;Q86TN4;F5H1K3;H0YGY9	TRPT1
-0.915971	-0.836692	-0.979296	0.962604	0.813945	0.95541	+	oe_kk47	5.05325	8.84606e-06	0	1.18941	28.6398	O00159;F5H6E2;I3L501	MYO1C
1.15247	1.1409	-0.0879107	-0.774164	-1.32343	-0.107868	+	oe_kk47	1.27441	0.0531606	0.0301025	-0.209937	-2.71682	F5H702;Q96GC5;F5H8D0	MRPL48
1.1044	0.270265	0.927339	-0.750791	-1.51062	-0.040595	+	oe_kk47	1.4425	0.0360994	0.0204468	-0.600572	-3.10347	F5H7W8;Q96C57;F5H3K2;E7ENF1;F5H8B7;G5EA44	C12orf43
-0.133891	-0.701884	-1.54214	0.468279	0.769613	1.14002	+	oe_kk47	1.60418	0.0248783	0.0145076	0.478715	3.50079	F5H8H2;Q03426;F5GXC0;F5H092;A0A1B0GWC2;F5H163;F5H368;A0A1W2PS16;A0A0B4J236;A0A1B0GWF3	MVK
0.267854	0.726821	0.41239	0.0788602	0.505979	-1.9919			0.52705	0.297132	0.231715	-0.964405	-1.19776	F6QDS0;Q9UMR2;H3BQK0;I3L352;H3BN59;H3BMQ5;H3BTX1;H0YD26;A0A1B0GV69;E9PR46;J3QL17;Q9UHL0	DDX19A;DDX19B
1.26102	-0.383146	-0.984544	-0.276258	-0.843927	1.22686			0.0261323	0.941603	0.962983	0.0160898	0.0779616	F6VRR5;Q9BY77;F8WCX5;Q8WUT1;Q6R954;F8WEE2	POLDIP3
-1.60521	-0.102196	-0.675794	0.910698	0.882304	0.590197	+	oe_kk47	1.61671	0.0241707	0.0143636	1.52549	3.53274	F8U8C0;O00220	TNFRSF10A
-1.27229	-0.461787	-0.813408	1.30372	0.750808	0.492954	+	oe_kk47	2.14653	0.00713625	0.0052083	1.75368	5.06885	F8VQR7;Q16527;F8VW96	CSRP2
-1.88453	0.0118279	-0.14665	0.528143	0.879933	0.61128			1.02499	0.0944083	0.052714	1.44663	2.18319	F8VRR3;F8VQZ7;P50579;G3V1U3;F8VZX9;F8VY03;F8VSC4	METAP2
0.197632	0.794473	0.740357	-1.88433	0.407141	-0.255273			0.750379	0.177673	0.120246	-0.337261	-1.63364	F8VRH0	PCBP2
1.11894	0.916534	0.611723	-0.637213	-0.772955	-1.23703	+	oe_kk47	2.78177	0.00165284	0.00185224	-0.365221	-7.5453	F8VU90;Q9NYL4;H0YHM7;E9PAR0	FKBP11
-0.704626	-0.222512	-1.53026	1.03361	0.835129	0.588654	+	oe_kk47	1.81601	0.0152753	0.0102278	0.846669	4.06582	F8VUB4;F8VV52;Q9NZN8;H0YI11;H0YH84;F8VRS8;F8W145;A0A087X050;F8VVY1;F8VX63;H0YHT8;F8VWH8;H0YI80;H0YHT6;F8VQD8;F8VQF4	CNOT2
-1.16213	-0.398399	-1.03121	0.590699	0.805119	1.19591	+	oe_kk47	2.37288	0.0042376	0.00303158	1.0386	5.85815	F8VUY8;Q96QD8	SLC38A2
0.592165	1.617	-0.597469	-0.125865	-1.27112	-0.214715			0.659258	0.21915	0.155823	-0.172831	-1.45582	F8VVA7;P61923;F8W651;F8VXB1;F8VUC5;F8W156;F8VXR1;F8VYZ4;F8VYK5	COPZ1
1.16772	0.862804	0.64789	-1.11774	-0.830616	-0.730054	+	oe_kk47	3.14294	0.000719548	0.00137906	-1.85039	-9.38039	F8VVS7;P55211;Q5JRU2;Q5JRU8;H0Y3S8;A0A087WX72;F8VWA5;H0Y6Y2	CASP9
-0.877621	-1.19465	-0.217592	0.00357101	1.40929	0.877	+	oe_kk47	1.41936	0.038075	0.0215808	0.20629	3.04873	F8VYE8;P36873;F8VR82;F8W0W8;A0A087WYY5	PPP1CC
-1.38406	-0.0578055	1.63056	-0.243239	0.45251	-0.397969			0.0472995	0.89681	0.930914	-0.0336348	-0.138133	F8VYN9;P40616;B4DZG7;F8VP99;F8VP63	ARL1
1.43885	0.982348	-0.107817	-0.786728	-1.05386	-0.472788	+	oe_kk47	1.46479	0.0342934	0.0192438	-0.387824	-3.15668	F8W1A4;P54819;F8VZG5;A0A5F9ZHP2;F8VY04;A0A5K1VW67;G3V213;F8VPP1	AK2
-0.533592	-1.40889	-0.603784	1.21806	0.663178	0.665038	+	oe_kk47	2.14111	0.00722587	0.00526733	0.793756	5.05104	F8W1B9;O95619;F8VTR4;F8W0J4	YEATS4
-1.06151	-0.857206	-0.802867	1.00745	0.787399	0.92674	+	oe_kk47	4.2376	5.78629e-05	0.000603352	0.994336	17.8517	F8W1R7;G3V1V0;P60660;J3KND3;B7Z6Z4;G3V1Y7	MYL6
-1.31935	-0.494127	1.61625	0.377309	0.259464	-0.439545			0.0495569	0.892161	0.92745	0.00805918	0.14441	F8W726;Q14157;Q5VU77;Q5VU79;Q5VU81;Q5VU80;H0Y5H6;H7C2T8	UBAP2L
1.68375	-0.451811	-0.465871	0.758115	-0.700854	-0.823332			0.228156	0.591349	0.66628	-0.0417074	-0.582722	Q96A26;F8W7Q4;E9PH05	FAM162A
-1.66719	0.339755	1.18876	-0.000327435	0.653548	-0.514545			0.0342767	0.924109	0.949954	0.0155277	0.101404	F8W7U8;P49959;F5GXT0;F5H742;F5H256	MRE11A
-1.01381	-0.795704	-0.922328	0.897453	0.93214	0.902247	+	oe_kk47	5.03789	9.16453e-06	0	4.13124	28.3866	F8W930;Q9Y6M1	IGF2BP2
-1.69439	-0.192331	1.37414	0.310821	0.309252	-0.107489			0.141147	0.722525	0.806076	0.653131	0.381073	Q567U6;F8W9X7;H7C050	CCDC93
0.933917	-0.209558	1.08509	-1.42773	0.439702	-0.821414			0.814903	0.153143	0.0997934	-0.459439	-1.76041	F8WAJ0;Q9H8H2	DDX31
-0.00338467	-1.98368	0.592234	0.366304	0.35433	0.674195			0.519876	0.302081	0.236881	0.50157	1.18367	Q86X83;F8WBW1;F8WC41	COMMD2
0.261176	-1.32582	-1.20438	0.723427	0.826108	0.719487	+	oe_kk47	1.38109	0.0415824	0.023887	0.856868	2.95932	J3QRU4;F8WCA0;L7N2F9;P63027;K7ENK9;K7EKX0	VAMP2;VAMP3
-1.01877	-0.919091	-0.792389	0.948658	0.855409	0.926185	+	oe_kk47	4.85492	1.39663e-05	0	0.849635	25.5364	F8WCF6;P59998;F8WDD7;A0A0A6YYG9;H7C0A3;R4GN08;F8WE39;F8WDW3	ARPC4-TTLL3;ARPC4
-0.918327	-1.06945	-0.731425	0.919166	0.980787	0.819247	+	oe_kk47	4.12381	7.51952e-05	0.000516746	4.07285	16.7076	F8WE88;Q9Y4I1;G3V394;E7ERV5;Q9UES5	MYO5A
0.0761973	-0.201135	-1.78077	1.24477	0.416298	0.24464			0.904201	0.124681	0.0754846	0.878098	1.93788	F8WF48;Q99442;F8WCJ7	SEC62
-0.671041	0.495091	1.7388	0.00217203	-0.950592	-0.614432			0.625406	0.236916	0.17151	-0.106895	-1.38989	F8WJN3;Q16630;F8W084;A0A3B3ISW1	CPSF6
-0.00403492	0.174292	-1.85946	0.00768759	0.61914	1.06237			0.716426	0.192121	0.131675	0.219144	1.56727	Q8IV38;G3V0G5;F8WB95	ANKMY2
-1.75135	-0.671412	0.54788	0.663556	0.668267	0.543061			0.874455	0.13352	0.08314	0.330475	1.87845	G3V0I5;P49821;B4DE93;E9PQP1;E9PLC6;E9PPR0;E9PMX3;E9PJL9;H0YE81;E9PPD6;E9PPS5;H0YD04	NDUFV1
-0.52287	0.769103	0.481881	1.3189	-0.838788	-1.20823			0.214249	0.610592	0.692466	-0.0516879	-0.551592	G3V1D1;G3V192;P02794;E9PPQ4;E9PRK8	FTH1
-0.766431	-1.08127	-0.839401	0.929912	0.623401	1.13379	+	oe_kk47	3.27791	0.000527339	0.000887984	0.515315	10.1657	G3V1C3;Q9BZZ5;H0YER7;E9PQK6	API5
-1.12051	-0.883933	-0.490294	0.249636	0.857789	1.38731	+	oe_kk47	1.9377	0.0115425	0.0083057	0.170844	4.41647	G3V1R5;O43847;F5H7V1;H0Y5G9	NRD1
-0.137399	-1.46059	-0.821413	0.993943	0.421884	1.00358	+	oe_kk47	1.70803	0.0195871	0.0124142	1.29408	3.77103	G3V1U5;Q9Y3E0;F5H6U7	GOLT1B
0.91987	0.90727	0.911199	-0.910916	-0.892349	-0.935073	+	oe_kk47	7.823	1.50314e-08	0	-4.81821	-141.335	G3V2A3	TUBB3
-0.588233	-0.880028	-1.21398	0.827792	0.950236	0.904212	+	oe_kk47	3.19982	0.000631219	0.00101141	1.74712	9.70419	G3V2D5;G3V2P5;Q07352;G3V515	ZFP36L1
0.309576	0.254049	-2.01819	0.647289	0.299438	0.507834			0.555612	0.27822	0.212007	1.35789	1.25372	G3V2Q1;P07910;G3V576;G3V555;G3V575	HNRNPC
0.641653	0.798676	0.725378	0.280698	-0.803092	-1.64331	+	oe_kk47	1.21419	0.0610675	0.0334962	-1.58238	-2.58404	G3V2S6;Q9Y5K8;H0YJS0;H0YJH8;G3V559;H0YJ55;G3V2V6	ATP6V1D
-0.859927	-0.761253	-0.937909	1.2032	0.211877	1.14401	+	oe_kk47	2.20032	0.00630493	0.00458854	1.20157	5.2482	G3V325;C9JJT5;O75127	ATP5J2-PTCD1
0.347728	1.21051	0.810563	-0.349702	-1.55547	-0.463638	+	oe_kk47	1.58302	0.0261204	0.015063	-1.06485	-3.44724	Q8N8N7;G3V3Y1;G3V2R9	PTGR2
1.08672	-0.0583159	1.32119	-1.039	-0.911973	-0.398614	+	oe_kk47	1.54008	0.028835	0.0170446	-0.364227	-3.34004	G3V529;Q9GZR7	DDX24
-1.16696	0.397161	0.635041	-0.0574702	-1.13989	1.33212			0.0332724	0.926249	0.950732	0.0188739	0.098534	G3V5T9;P24941;E7ESI2;G3V317	CDK2
0.872129	-0.451432	-1.5702	1.16116	0.327133	-0.338794			0.390013	0.407368	0.371882	0.124264	0.924893	G3V5V3;O60524;G3V4D9;G3V547	NEMF
0.710323	-0.394853	-1.75386	1.03119	-0.0385091	0.445707			0.545757	0.284605	0.218013	0.17134	1.23443	G3XAH6;P51003;A0A0C4DGK1;G3V3I9;H0YJ00;G3V457;Q9NRJ5;H0YJL4;F8WAT4	PAPOLA
0.331217	-2.02836	0.369106	0.525726	0.545362	0.256945			0.481982	0.329623	0.269799	0.397069	1.10898	G5E9A6;P51784	USP11
-0.0568704	1.2975	0.921337	-0.867588	0.0138682	-1.30824	+	oe_kk47	1.20875	0.0618372	0.033834	-0.382252	-2.57217	G5E9Z2;Q96KA5	CLPTM1L
1.88004	-0.741582	0.143861	-0.0336235	-0.385511	-0.86318			0.457204	0.348976	0.29347	-0.118512	-1.05983	G5EA30;Q92879;E9PKU1;E9PQK4;E9PSH0;F5H0D8;F5H4Y5;E9PKA1;A0A1B0GUN8;E9PC62;A0A1B0GU44;F5H3J7;A0A0J9YX66;Q5VZZ6;V9GYD9;O95319;A0A0J9YXJ0	CELF1
-1.44526	-0.103377	-0.924554	0.846648	0.868451	0.758095	+	oe_kk47	1.86537	0.0136342	0.00956044	1.36117	4.2056	G5EA48;Q7Z6B7	SRGAP1
-0.49696	0.983619	1.07439	0.329551	-0.338901	-1.5517			0.624185	0.237583	0.171919	-0.1692	-1.38751	G8JLB3;Q9Y606;F5H1S9;F5GY32;F5GXL3;F5H168;F8W9U5;F5H1B2	PUS1
1.59402	-0.0410982	0.500695	-0.0725793	-0.644676	-1.33636	+	oe_kk47	1.0654	0.0860201	0.0479652	-0.133049	-2.26691	P31943;G8JLB6;E9PCY7;D6RBM0;H0YB39;D6RIU0;D6RIT2;D6RDU3;E5RGV0;D6R9T0;D6RFM3;E7EN40;D6RAM1;D6RJ04;D6RIH9;H0YBD7;E7EQJ0;H0YBG7;D6RDL0;D6RF17;H0YAQ2;E5RGH4;D6R9D3;E5RJ94;H0YBK1	HNRNPH1
-0.041552	-0.206254	-1.84434	0.930314	0.663739	0.498096	+	oe_kk47	1.11347	0.077007	0.0427589	2.75164	2.36779	H0UI06;P14406;D6RIE3;D6RGV5;D6R9C3	COX7A2
-0.344994	0.437887	0.936653	0.68687	0.107992	-1.82441			0.334738	0.46266	0.460817	-0.127626	-0.811393	H0UI80;X6RLT1;Q8IXH7	TH1L;NELFCD
0.810996	0.669796	1.19577	-0.702742	-0.882165	-1.09166	+	oe_kk47	3.11683	0.000764135	0.00134744	-1.2658	-9.23516	Q5QPK2;H0Y368;O60762;A0A804HIK9;A0A804HJ93;Q5QPJ9;A0A804HIB3	DPM1
-0.329085	1.15903	1.316	-0.44738	-0.554467	-1.14409	+	oe_kk47	1.18585	0.0651854	0.0358888	-0.420717	-2.52247	H0Y4B0;O43414;F6QUN3;A0A3B3ISV9;F6UGJ8	ERI3
0.463951	-0.880945	1.7269	-0.595553	-0.81362	0.0992714			0.472047	0.337251	0.278134	-0.177533	-1.0893	H0Y517;H7C1U3;Q5T0F9	CC2D1B
0.0807217	-1.02296	-1.43585	0.784411	0.787647	0.80603	+	oe_kk47	1.60459	0.0248548	0.0145161	1.12776	3.50183	H0Y599;Q8N1I0;F5GXW1;H0Y7H7;A0A590UJ51;C9J637;A0A590UJM5;C9J7D9;Q8IZD9	DOCK4
-1.52684	0.5291	-1.01718	0.694308	0.653631	0.66698			1.01991	0.0955191	0.053518	1.09559	2.17271	H0Y621;H0Y5K5;Q9Y282;A0A1W2PPS8	ERGIC3
0.663548	1.22455	0.803061	-0.909418	-0.869368	-0.912374	+	oe_kk47	3.34898	0.000447734	0.00049467	-1.14852	-10.6036	H0Y612;Q9UPN9	TRIM33
0.124105	1.09149	-1.85841	0.261392	-0.124325	0.505744			0.184168	0.654383	0.740936	0.263408	0.482935	H0Y6I0;Q13439;A0A087WTW2;E7EVX2;C9JHJ5	GOLGA4
0.520523	1.15342	-1.73324	0.53155	-0.25197	-0.220285			0.0143367	0.967527	0.979692	0.0108846	0.0433136	H0Y6I6;Q96ME1	FBXL18
-1.15322	-0.893639	-0.638428	0.797681	0.791998	1.09561	+	oe_kk47	3.24789	0.00056508	0.00105138	0.620085	9.9859	H0Y714;Q96G21;B9A008;E7ENR5;B8ZZ47;F8WCN0	IMP4
-1.87125	-0.0392411	-0.0937866	0.888239	0.753413	0.362623			1.00784	0.098211	0.0553103	0.70193	2.14792	H0Y886;O43674;E7EWP0;H7C568;A0A7P0TAR2;A0A087WYD0	NDUFB5
-1.05545	-0.984693	-0.67479	0.941604	0.919122	0.854204	+	oe_kk47	3.95138	0.000111846	0.000407547	1.54418	15.1091	H0Y8C3;Q9NZJ7	MTCH1
0.226404	1.17119	1.09106	-0.988763	-0.373025	-1.12687	+	oe_kk47	1.91666	0.0121155	0.00858405	-1.14013	-4.35438	H0Y8X4;O43598	DNPH1
0.089159	0.393429	-1.82916	1.21682	0.0305893	0.0991674			0.492295	0.321888	0.260419	0.803571	1.12935	H0Y8X6;P46934	NEDD4
1.63191	0.861171	-0.604984	-0.467124	-0.737734	-0.683234			0.88706	0.1297	0.079962	-0.116959	-1.9036	H0Y938;H0YAC7;P35606;A0A7I2V258;A0A7I2V3G0;A0A7I2YQF9;D6R997;D6RBT6;D6RBZ7;D6RCL6;D6RBG7	COPB2
-1.76114	-0.582372	0.930091	0.471409	0.589832	0.352181			0.530805	0.294574	0.228751	0.486184	1.20512	H0Y9X1;Q96EY4;D6RA57;D6RE67;D6RC31	TMA16
0.0886684	-0.0984402	-0.535305	1.74115	0.0907991	-1.28687			0.15157	0.705391	0.790382	0.0283006	0.406194	H0YDT6;O00303;A0A7I2YQA0;A0A1W2PP79;A0A7I2V4S2	EIF3F
0.774651	-0.815218	-1.63112	0.467054	0.346306	0.858325			0.703112	0.198102	0.136107	0.249926	1.54128	H0YEB6;O60232;G3V1B8;H0YEK1;E9PN57;E9PK41	SSSCA1
-1.90703	0.561063	0.218226	0.783896	-0.232573	0.576415			0.379628	0.417227	0.385793	0.738101	0.903767	H0YF29;Q6P1X6	C8orf82
-0.0246593	-1.16539	-1.23487	1.09038	0.531365	0.803177	+	oe_kk47	1.72286	0.0189295	0.0119346	0.175538	3.81065	H0YFD6;P40939;A0A2R8Y4F5;A0A2R8YG21;A0A2R8Y688	HADHA
1.44566	0.331742	0.765335	-0.92034	-0.971163	-0.651232	+	oe_kk47	2.12548	0.00749066	0.00547833	-0.641777	-4.99994	H0YGM0;Q9H078;A0A2U3TZY2;F5H392;A0A2R8Y6R5	CLPB
-0.835163	-1.00141	-0.896937	0.928951	0.947038	0.857525	+	oe_kk47	5.28417	5.19792e-06	0	4.54157	32.7269	H0YIV9;O43716;F8VRU3;J3KMY1	GATC
-0.659954	-1.56415	0.903524	1.11091	0.255581	-0.0459083			0.47788	0.332751	0.273924	0.281481	1.10086	H0YJ75;Q13362;Q96B13;H0YN84;H0YJ49;H0YJU0;G3V2U3	PPP2R5C
-0.0554977	0.350574	-1.98073	0.546819	0.609737	0.529096			0.71371	0.193326	0.132093	1.4149	1.56196	Q5SZE2;Q5SZE3;H0YKH6;Q5SZE4;Q5SZE1;H0YNU7;Q96G23	CERS2
-0.256831	-1.56591	0.546299	1.10557	0.773414	-0.602539			0.454088	0.351489	0.296195	0.292144	1.05363	H0YKX0;Q96EP0;A0A0B4J293;H0YMG4	RNF31
0.184026	0.830651	0.761349	0.268499	-0.146372	-1.89815			0.786209	0.163603	0.10937	-0.588189	-1.70391	H0YM23;O75179;A0A1W2PQ15;H0YLQ3	ANKRD17
1.16264	0.196482	1.12629	-1.04491	-1.04565	-0.394858	+	oe_kk47	1.90565	0.0124265	0.00865254	-0.918678	-4.32212	H0YMV8;Q71UM5;C9JLI6	RPS27L
-0.00308213	1.19628	1.15004	-1.06481	-0.254964	-1.02347	+	oe_kk47	1.52637	0.0297598	0.0172952	-0.342222	-3.30622	H0YN26;P39687;H7BZ09;O95626;O43423	ANP32A
-1.31203	0.931155	0.578428	-1.18925	0.788181	0.20351			0.0496441	0.891982	0.92763	-0.0363839	-0.144652	H0YNG3;P67812;H0YNX5;H0YNA5;H0YKT4	SEC11A
0.575285	0.518845	0.741576	-0.035484	0.155411	-1.95563			0.838244	0.14513	0.0934211	-0.890474	-1.80654	H0YNH8;Q9BZF9;F5H2B9;H0YN48;H0YMI1	UACA
1.18085	1.22243	-0.439832	-0.923855	-0.00797795	-1.03162			0.963223	0.108837	0.0639752	-0.181664	-2.05688	H3BLU7;O43488;H7C5H7;A0A499FJT0;Q8NHP1	AKR7A2
1.39673	0.863179	0.203353	-1.03929	-1.00246	-0.421503	+	oe_kk47	1.83399	0.0146558	0.0099865	-1.10533	-4.11637	H3BM67;H3BUP2;H3BUN4;O60936;H3BQJ5;J3QLT7	NOL3
0.959708	0.726702	1.01711	-0.712759	-0.879677	-1.11108	+	oe_kk47	3.61032	0.00024529	0.000642659	-2.05268	-12.3722	H3BMA1;H3BUX1;Q13421;H3BR90	MSLN
-0.246317	1.18691	1.18955	-0.913195	-0.0883198	-1.12863	+	oe_kk47	1.16391	0.068563	0.0381785	-0.31892	-2.47521	H3BV80;H3BMM9;H3BTC0;Q15287;H3BPG5;H3BMS0;H3BRK4;H3BTV0;H3BNI3;H3BP82;H3BTR6;H3BUG0;H3BTY0;H3BNU7;H3BUL0	RNPS1
0.69151	0.227954	-1.18089	1.21857	0.273887	-1.23103			0.0668935	0.857248	0.906169	0.0202853	0.191792	H3BNC9;P08708;H0YN88;A0A075B716;H0YN73;A0A0J9YYC4	RPS17
0.616456	0.700651	0.535902	0.678655	-1.56302	-0.968642			0.854025	0.139951	0.0886239	-1.18806	-1.83783	H3BNT4;Q99547;H3BSB3;H3BNK8;H3BU96	MPHOSPH6
-1.2884	1.45378	0.843711	-0.00415464	-0.432677	-0.572257			0.325771	0.472312	0.474875	-0.157251	-0.792709	P06865;H3BP20;H3BS10;A0A804HIQ5;A0A804HLJ5;A0A804HKX5;A0A804HIC8;A0A804HIU3;H3BTD4;H3BU85;A0A804HJ97;A0A804HK32;A0A087WUJ7;H3BQ04;H3BT62;H3BVH8;A0A804HIC7;A0A087WTY2;A0A804HJK0;H3BRP6	HEXA
-0.504918	-0.93764	-1.22227	0.896543	0.835495	0.932792	+	oe_kk47	2.96697	0.00107902	0.00136037	1.97061	8.44083	H3BPE1;H3BQK9;A0A590UJG2;A0A7P0MQR8;Q9UPN3;H0Y390;E9PNZ4;A0A5F9ZGX0;A0A669KBB0;E9PLY0;A0A669KB06;H0Y314;H0Y4F5;A0A669KB84	MACF1
-1.4716	1.46425	0.54386	0.0521999	0.0362161	-0.624931			0.148804	0.709898	0.79584	-0.0574067	-0.399558	H3BPK3;Q16775;H3BPQ4;H3BQW8;H3BV79	HAGH
-0.223535	-1.90244	0.357736	0.262504	0.764555	0.741175			0.779674	0.166083	0.111364	0.942178	1.69108	H3BPR2;Q13232	NME3
0.526629	-0.676587	1.69087	-0.255002	-0.135975	-1.14993			0.610702	0.245074	0.178823	-0.410947	-1.36124	H3BQI7;H3BT52;Q3SXM5;H3BNH5	HSDL1
-1.07348	-1.13884	-0.427418	1.046	0.752808	0.840927	+	oe_kk47	2.71405	0.00193175	0.00186767	1.22575	7.23973	H3BRB3;Q14807;H3BTH5;I3L306	KIF22
-0.231542	-1.49461	-0.774767	0.893323	0.698781	0.908816	+	oe_kk47	1.95968	0.0109729	0.00809934	1.69523	4.48203	Q96NX8;H3BU86;O14662;F8W9Z6;B7ZBM8;B7ZBM4;B7ZBM5	STX16;STX16-NPEPL1
-0.149448	-0.630115	-1.61956	0.767457	0.952729	0.678938	+	oe_kk47	1.65565	0.0220978	0.0134717	0.162666	3.63316	H3BVG0;Q8N1F7;H3BM93;H3BRI8;H3BPA9;H3BVE2;H3BNN5;H3BV11;H3BP95;H3BMX0;H3BRD9;H3BV15;H3BNG7	NUP93
-1.10169	-1.03729	-0.547572	0.942252	0.898031	0.84627	+	oe_kk47	3.26873	0.000538605	0.000879032	1.92405	10.1104	H7C2Z6;H7BXD5;P28676;C9JIZ3	GCA
0.691114	1.06273	0.961206	-0.941415	-0.957184	-0.81645	+	oe_kk47	3.95571	0.000110736	0.000413793	-0.847255	-15.1473	H7BXI1;A0A499FIX8;A0A087WXU3;A0FGR8	ESYT2
-1.05634	-0.917195	-0.737273	0.723119	0.971687	1.016	+	oe_kk47	3.81213	0.000154124	0.000763158	0.909628	13.9276	H7BYT1;P48730;J3QQI9;B0QY36;H0Y2N6;J3KRM8;B4DLF1	CSNK1D;CSNK1E
-1.18756	-1.37628	0.448763	0.742868	0.665675	0.706533	+	oe_kk47	1.14352	0.0718588	0.0399423	2.58609	2.43158	H7BYY1;F5H7S3;B7Z596;H0YKJ4;H0YK48;A0A494BZZ2;H0YL42;H0YN06	TPM1
1.75348	0.473343	-0.234171	-0.56106	-1.10752	-0.324069			0.994877	0.101187	0.0578519	-0.3513	-2.12136	H7BZ14;Q9H2H8;B8ZZ77;C9K058;F8WC82;C9J4N2	PPIL3
-1.09787	-0.973725	-0.609027	0.668042	1.05151	0.961079	+	oe_kk47	3.1754	0.000667729	0.00119626	0.948805	9.5639	H7C096;J3KN59;Q12982;Q86WG3	BNIP2;ATCAY
-0.968552	-0.920092	-0.842873	1.01924	0.848918	0.863359	+	oe_kk47	4.99741	1.00598e-05	0	2.05697	27.7301	H7C1N3;O15155;A0A3B3IU16;C9JTT8;Q68DU7	BET1;DKFZp781C0425
0.904556	0.771179	0.302423	-1.56775	0.485284	-0.895697			0.979005	0.104953	0.0615578	-2.12396	-2.08897	H7C1U8;Q9BUR5;A0A0J9YWW6;G3V1B6	APOO
1.06948	0.480298	1.11348	-0.964874	-0.770222	-0.928158	+	oe_kk47	2.94869	0.00112541	0.00135194	-0.798852	-8.34836	H7C2Q8;Q99848	EBNA1BP2
-1.97552	0.37635	0.107828	0.254924	0.37872	0.857696			0.578556	0.263903	0.197488	0.694574	1.29855	H7C3X5;Q13190;E9PNU4	STX5
0.920096	-0.19084	-1.8992	0.434285	0.208404	0.527257			0.399923	0.398178	0.358429	0.600156	0.944979	H7C5U8;Q9P0M9;D6RAN8;D6RE11;B3KN43	MRPL27
-0.732296	-1.21688	-0.746545	0.87731	0.872911	0.9455	+	oe_kk47	3.43649	0.000366024	0.000539535	4.57476	11.1672	I3L0A0;Q13404;A0A0A0MSL3;G3V2F7;E5RIF1;D6RG00	TMEM189-UBE2V1;UBE2V1
0.335517	-1.98752	0.0503243	0.666664	0.630422	0.304595			0.652187	0.222748	0.159147	1.66599	1.44205	Q9Y2R5;I3L0E3;E9PE17	MRPS17;hCG_1984214
-0.44583	-0.774382	0.208271	1.3337	0.917928	-1.23969			0.327013	0.470963	0.472808	0.0643196	0.795303	I3L0N3;P46459;I3L2G1;I3L0L3;K7EQD6;I3L338;I3L4Q9	NSF
1.01516	0.77057	0.877004	-0.621094	-1.28218	-0.759458	+	oe_kk47	2.94279	0.0011408	0.00149383	-1.612	-8.31867	I3L0U2;I3L3C7;Q9Y6M0	PRSS21
-0.260456	-0.630895	-1.48676	0.846273	0.299953	1.23188	+	oe_kk47	1.60464	0.0248519	0.0145246	0.399444	3.50196	I3L0X5;O75391;I3L4C3;I3L0Q5	SPAG7
-0.446762	-1.26923	-0.54757	1.39146	0.971395	-0.0992955	+	oe_kk47	1.37135	0.0425256	0.0244322	0.207744	2.93678	I3L1P8;Q02978	SLC25A11
-0.452569	-0.217721	-1.54474	1.3909	0.203047	0.621078	+	oe_kk47	1.28959	0.0513346	0.02892	0.158477	2.75076	J3QS48;I3L295;J3KT75;J3QW43;J3QRD5;O75352;I3L1D2;J3KTK8;J3QQZ4;J3KSI4;I3L405;I3L261;I3L4E0	MPDU1
1.24136	-0.332338	1.29338	-0.668982	-0.604644	-0.928773	+	oe_kk47	1.26961	0.0537514	0.0304175	-0.391144	-2.70614	I3L2C7;P57678;I3L399;I3L4A4;I3L4M4;I3L1J7;E7EN12	GEMIN4
-0.669764	-1.09328	-0.903614	0.566467	1.13176	0.968434	+	oe_kk47	2.98871	0.00102634	0.00138413	0.639234	8.55201	I3L2K5;Q8IWR0;I3L2N8;I3L382;I3L323	ZC3H7A
-1.93932	-0.194454	0.440714	0.554801	0.729393	0.408868			0.719395	0.190812	0.130531	0.997135	1.57306	I3L448;Q5TC12;A8MRA7;H0YEW4;H0YD21;H0YCA6	ATPAF1
0.829248	0.675405	0.699864	-1.45684	-1.06828	0.320596	+	oe_kk47	1.27292	0.0533433	0.0301804	-2.48965	-2.71352	I3L4C2;Q9UQB8;I3L2M4;B4DWA1;I3L1C8;I3L327;I3L125;I3L4A3;I3L526;I3L0M4;I3L3J7;I3L3C6;I3L2J6;I3L113;I3L3C5;I3L0Y9	BAIAP2
-0.444484	-1.01714	-1.16401	1.13326	0.6594	0.832972	+	oe_kk47	2.599	0.00251768	0.00208457	0.327805	6.74551	I3L4N8;P63261;A0A804GS07;A0A6Q8PFE4;I3L3I0;I3L1U9;K7EM38;I3L3R2;J3KT65;A0A2R8YEA7;A0A2R8YFE2;F8WCH0;Q9BYX7;A0A7P0TBL1	ACTG1
-1.36447	-0.530664	-0.430164	0.212721	0.611957	1.50062	+	oe_kk47	1.48882	0.0324474	0.0183032	0.374435	3.21456	J3KMZ7;Q9H0H0;A0A2R8Y7F8;A0A2R8Y4Z6	INTS2
-1.02514	-1.30769	0.875917	-0.153396	0.529735	1.08058			0.557059	0.277294	0.211565	0.110352	1.25655	Q92785;J3KMZ8;E9PN04;A0A3B3ISD5;A0A3F2YNX6;A0A3B3IS53;A0A3B3ISI1;A0A3B3ITI0;A0A3B3IT19;A0A3B3IU93;A0A3B3IRI4;A5PLL3;A0A3B3IS73;A0A3B3IT63;A0A3B3ISF5;A0A3B3ISW3;A0A3B3ISU5;A0A3B3ITA4;A0A3B3IUA4;E9PDV3;C8C3P2;J3KQY6;A0A804CCM0;A0A804CYY4;Q92782;Q92784;Q92794;Q8WYB5	DPF2
1.39362	0.929393	0.150059	-0.864047	-1.05993	-0.549098	+	oe_kk47	1.86498	0.0136465	0.00955388	-0.722974	-4.20448	J3KN29;O00233;F5H5V4;F5GX23;F5H7X1;F5H169	PSMD9
0.542001	-0.248779	-1.86288	0.0385386	0.752259	0.778864			0.630032	0.234406	0.169359	0.181102	1.3989	J3KNF4;O14618;E9PP76;E9PK03	CCS
1.11898	0.367904	1.04286	-1.00137	-1.18506	-0.343309	+	oe_kk47	2.0704	0.00850354	0.00627896	-0.364201	-4.82314	Q01130;J3KP15;J3QL05	SRSF2
-1.69179	0.895734	1.11102	-0.231926	-0.189695	0.106648			0.0818422	0.828243	0.886728	-0.280461	-0.23156	J3KPD3;I3L521;F5GXV8;Q9Y580;G3V1T9;F5GY08;F5H606	RBM7
0.203938	-1.66929	-0.703638	0.516981	0.676113	0.975896	+	oe_kk47	1.219	0.0603949	0.0331596	1.32594	2.59453	S4R360;J3KPP0;S4R2Z7;Q9Y6G3	MRPL42
0.8892	1.0692	0.560825	-0.438335	-0.596373	-1.48452	+	oe_kk47	2.02832	0.00936871	0.00696951	-0.389379	-4.69129	J3KPP4;O95232;D6RDI2;H0YA81;D6RHH0;H7C5U7;U3KQT3;C9JL41	LUC7L3
-0.673138	-1.02738	-0.948665	1.05171	1.12227	0.475199	+	oe_kk47	2.80077	0.00158209	0.00188204	0.375132	7.63303	J3KQ32;Q9NTK5;C9JCJ9;C9JTK6	OLA1
0.55946	0.691291	1.106	0.0775725	-1.30913	-1.12519	+	oe_kk47	1.55582	0.0278087	0.0162142	-1.02134	-3.3791	J3KQ34;Q9H9Q2;J3QT73;A0A087X1P5;J3KQ41;J3QT95	COPS7B
0.938104	0.41903	1.14857	-1.15326	-1.11245	-0.239993	+	oe_kk47	1.9771	0.0105414	0.00762087	-0.51077	-4.53445	J3KQ48;Q9Y3E5	PTRH2
-1.66293	1.11726	0.532246	0.544978	0.0981055	-0.629666			0.00320337	0.992651	0.994142	0.000858943	0.00979873	J3KQJ1;Q8NBJ7;C9JL30;A8MXB9;A0A494C1B1;C9J660;E9PBT8;H7C3B2;F8WA42;J3QT17;F8WEX5;E9PG02;F8WEV7;F8WES7	SUMF2
-1.36593	-0.0147912	-1.05123	0.795411	0.987222	0.649327	+	oe_kk47	1.7422	0.0181051	0.0113557	1.46273	3.86272	Q9BQE5;J3KQL8;E9PM95	APOL2
1.71606	0.244645	-0.541938	0.0291237	-1.29515	-0.152743			0.533979	0.292429	0.227205	-0.160281	-1.21135	J3KQN4;P83881;H0Y5B4;H7BZ11;R4GN19;H7BY91;H0Y3V9	RPL36A;RPL36A-HNRNPH2
1.19411	1.29606	-0.924621	-0.90227	-0.383348	-0.27993			0.627235	0.23592	0.170504	-0.19559	-1.39345	J3KQS6;Q9NWV8;M0R0I0;M0QXG9;M0R3F4;M0R2A4;M0R2K3;M0R193;M0R2I2;M0R3H9	BABAM1
0.0437513	-1.17561	-0.902936	0.89614	1.39073	-0.252076			1.04294	0.0905858	0.0503887	0.38361	2.22027	J3KR35;Q8WUD4;S4R331;C9JUN5	CCDC12
-1.06152	-0.808769	1.04868	1.3014	0.154174	-0.633967			0.249117	0.563486	0.624719	0.0796388	0.628995	J3KR44;Q96FW1;F5H6Q1;F5GYN4;F5GYJ8;F5H3F0	OTUB1
0.584126	-0.197574	-1.89438	0.778886	0.0827584	0.646187			0.58909	0.257579	0.191843	0.445334	1.31911	J3KR72;P49848;C9JTY6;C9JFL8;E5RKA5;F8WEJ7;C9J7C4;C9JIS2;E5RHA1;C9J088;C9JHQ8	TAF6
-1.1348	-0.63506	-0.619386	1.16985	1.24738	-0.0279774	+	oe_kk47	1.63129	0.0233728	0.0141216	0.70383	3.57014	J3KS05;P83916;B5MD17;K7ELA4;C9JWS9	CBX1
-0.180074	1.23427	1.01767	-0.314289	-0.260258	-1.49732	+	oe_kk47	1.08781	0.081694	0.0456147	-0.782199	-2.31377	Q14197;J3KS15;J3QRF8	ICT1
1.36093	0.35087	0.735377	-0.390599	-1.35742	-0.699165	+	oe_kk47	1.78558	0.016384	0.0105114	-1.86285	-3.98124	J3KSY6;Q8TCD5;J3KRC4;J3KSX6	NT5C
1.79011	-0.573593	-0.905474	-0.580307	-0.235245	0.504514			0.0807285	0.83037	0.887331	-0.0687415	-0.22863	J3KT51;Q9UK76	HN1
1.04614	0.507242	0.970895	-0.22329	-1.08516	-1.21583	+	oe_kk47	2.04826	0.00894829	0.00667697	-0.329194	-4.75342	J3KTL2;Q07955;J3KSR8;J3QQV5;J3KSW7	SRSF1
-1.23565	0.804305	-1.33515	0.558651	0.57148	0.636364			0.778222	0.16664	0.11146	1.84584	1.68822	J3QQV2;J3KTM6;O15427;J3QSC3;J3QQS9;J3QRA0;J3KTI8;J3QRP8	SLC16A3
0.642788	0.476033	1.42807	-0.950269	-1.0659	-0.530729	+	oe_kk47	2.1439	0.0071796	0.00528477	-0.318173	-5.06018	J3QL56;O75880	SCO1
-1.48013	1.14465	0.904433	0.403464	-0.335552	-0.636866			0.159358	0.692854	0.779947	-0.103888	-0.424773	J3QLE5;P63162;P14678;J3KRY3;S4R3P3	SNRPN;SNRPB
-0.32426	-0.0766469	-1.74319	1.16753	0.560035	0.416539	+	oe_kk47	1.18327	0.0655737	0.0362462	0.483805	2.51689	J3QLR8;Q9Y3D9	MRPS23
-1.02318	-1.3513	-0.0793948	1.07767	0.609132	0.767069	+	oe_kk47	1.80538	0.0156538	0.0104227	0.464748	4.03614	J3QLS3;Q9Y2R9;J3QQS1;J3KSI8;J3QKW2	MRPS7
-0.23698	0.720093	1.68724	-0.78255	-0.654285	-0.73352	+	oe_kk47	1.22101	0.060116	0.033087	-0.220195	-2.59892	J3QQ67;Q07020;G3V203;H0YHA7;F8VYV2;F8VUA6;A0A075B7A0;F8VXR6	RPL18
1.84258	-0.294898	0.0789877	-0.299696	-0.14319	-1.18379			0.669964	0.213814	0.150712	-0.237958	-1.47667	J3QQJ0;Q9UHR5;X6R3T8;J3QLH3;J3QLM2;J3KRR6;J3KS14;F5H478;J3KRU5	SAP30BP
-1.11757	0.169967	-1.35095	1.00847	0.490245	0.799832	+	oe_kk47	1.43585	0.0366564	0.0204982	1.0953	3.08769	J3QQW9;Q15022	SUZ12
0.99695	0.692138	1.00495	-0.719487	-1.14545	-0.829099	+	oe_kk47	3.40308	0.000395294	0.000520179	-1.48795	-10.9488	J3QQZ9;Q9NVS9;J3QQV6;A0A286YFL3	PNPO
1.0041	0.746466	0.967532	-0.844894	-1.05942	-0.813779	+	oe_kk47	4.07582	8.39808e-05	0.000493151	-2.04008	-16.2469	J3QR07;Q96MU7	YTHDC1
0.884024	0.893057	0.958759	-0.883295	-0.873532	-0.979012	+	oe_kk47	5.81306	1.53794e-06	0	-4.88141	-44.4054	J3QRG6;P42771;K7ES20;K7ENC6;P42772	CDKN2A
-1.20085	-0.922439	-0.546621	0.810761	1.03617	0.822976	+	oe_kk47	3.02865	0.00093616	0.0014202	1.18043	8.75983	J3QRS3;P19105;O14950;P24844;J3KTJ1	MYL12A;MYL12B
1.19523	0.896187	0.538448	-0.992247	-1.09532	-0.542297	+	oe_kk47	2.63188	0.0023341	0.00199531	-0.710567	-6.88364	J3QRS9;X6R4W8;O43670;J3QS27;J3KTL1;J3KRB6;J3KRW6;H0Y3M2;J3KS31	ZNF207
0.507027	-1.54458	-0.989818	0.707077	0.605716	0.714575			1.03426	0.0924145	0.0516902	1.80133	2.2023	J3QRU1;P07947	YES1
0.375942	-0.860844	0.922909	-0.40984	-1.25857	1.2304			0.117966	0.762139	0.837034	-0.0448869	-0.324046	J3QRU8;Q9Y2X7;A0A0C4DGN6;J3QL89;J3QQI0;K7EN79;J3QLH1	GIT1
0.285653	1.18007	1.02229	-1.34299	-0.676381	-0.468643	+	oe_kk47	1.91448	0.0121764	0.00856574	-0.534057	-4.34797	O43684;J3QT28;J3QSX4	BUB3
0.768898	0.991863	0.892049	-1.00199	-1.18781	-0.463015	+	oe_kk47	2.83654	0.001457	0.00192857	-2.09739	-7.80075	J3QTA2;Q99933;C9JYK5;A0A0U1RR89;F1LLU6	BAG1
0.544847	-1.8773	-0.270333	0.181333	0.533736	0.887718			0.652965	0.222349	0.158856	0.736411	1.44356	J3QTA6;Q9BRQ6;H0Y922;J3QTB2	CHCHD6
1.17431	0.151373	-0.476799	-0.117149	0.876973	-1.60871			0.259686	0.549938	0.605101	-0.273766	-0.652053	K7EIK7;O95834;A0A0C4DGQ7;C9JRL6;K7EII6;K7EKG3;K7ELI8;K7ELB2;K7EKU5	EML2
-1.99102	0.266936	0.545814	0.603656	0.549199	0.0254165			0.404002	0.394455	0.353148	0.529705	0.953225	K7EIU8;Q13485;K7EL18;K7EIJ2;K7ES96;K7EL15;A0A087WUF3	SMAD4
0.644856	-0.0152448	-1.97279	0.437139	0.665696	0.240348			0.490396	0.323299	0.26208	0.990762	1.1256	Q9BV68;K7EIY6;U3KQF4	RNF126
-1.01806	1.16531	1.25004	-0.849841	0.0186139	-0.566065			0.521315	0.301082	0.235896	-0.225619	-1.18649	K7EQ55;K7EK33;Q96EP5;K7EQ02	DAZAP1
0.776001	0.960783	0.984642	-0.751287	-0.980481	-0.989658	+	oe_kk47	4.2295	5.89522e-05	0.000590164	-1.65866	-17.7678	K7EKE6;K7EJE8;P36776;K7ER27;K7EQF8;K7ERR6;K7ER56	LONP1
-1.44295	-0.119287	1.34899	0.914749	-0.373873	-0.32763			0.0538248	0.883436	0.921745	0.0196317	0.156207	K7ELC2;P62841;K7EM56;A0A0B4J2B4;S4R417;K7EQJ5;K7EJ78;S4R456	RPS15
-0.523547	0.170246	-1.70448	1.18935	0.431194	0.437236	+	oe_kk47	1.07046	0.0850237	0.04762	0.510639	2.27747	K7ELG9;Q3MHD2	LSM12
1.52962	0.275222	0.515634	-1.25107	-0.836062	-0.233345	+	oe_kk47	1.47902	0.0331879	0.0188367	-0.357581	-3.1909	K7ELL7;P14314;K7EPW7;A0A7I2V2T6;A0A0C4DGP4;K7EKX1;K7EJ70;K7EIP3	PRKCSH
-0.745457	-1.32299	-0.565367	1.05448	0.87708	0.702247	+	oe_kk47	2.66381	0.00216865	0.00203593	1.66888	7.02015	K7EM09;K7EPR0;K7ELQ9;Q6UW68	TMEM205
-1.25124	1.07736	1.21635	-0.875414	-0.000249461	-0.166809			0.340471	0.456593	0.450657	-0.104504	-0.823295	K7ELV2;Q96EE3;K7ENI5;K7EP88;K7EPZ5	SEH1L
-0.923071	-0.841742	-0.953941	1.01894	1.00236	0.697452	+	oe_kk47	4.10411	7.86846e-05	0.000509434	0.490616	16.517	K7EM18;P41567	EIF1
-1.42634	0.565763	1.11787	-0.598102	-0.529606	0.870414			0.0657596	0.859489	0.907626	-0.0193399	-0.188735	K7EP90;Q9BTD8;K7EQ03;K7ER08;K7EML2	RBM42
-0.371139	0.890211	0.201945	0.959091	-1.7614	0.0812939			0.211685	0.614207	0.697046	-0.0561562	-0.545812	K7EQG9;P17706;D3DUJ3;K7EIE9;K7ER87;A0A2R8YD79	PTPN2
-1.49497	-0.616664	-0.190954	1.20108	0.937456	0.164048	+	oe_kk47	1.44363	0.0360056	0.0203627	0.384854	3.10615	Q06136;K7ERC8;K7EQS7	KDSR
-0.0692588	-0.0721444	-1.88486	0.740662	0.466248	0.819352			1.03297	0.0926894	0.0519949	1.42951	2.19965	L0R6Q1	SLC35A4
1.24163	-0.25386	1.05686	-0.328531	-1.44819	-0.267909	+	oe_kk47	1.0546	0.0881861	0.0489767	-0.121584	-2.24444	M0QWZ7;Q9NP81;M0R2C6;M0QX29;B4DJM9;M0R1C0;M0R2H5	SARS2
-1.64401	-0.802279	0.422001	0.459298	0.923844	0.641143			1.03068	0.0931794	0.0521588	0.338855	2.19491	M0QZ10;M0QXF9;O15382;B3KSI3;M0QZP4;M0R2K7	BCAT2
-1.69595	0.373186	-0.743616	0.737759	0.712326	0.616297	+	oe_kk47	1.081	0.0829851	0.046523	1.85651	2.29951	M0QXZ5;Q96B54	ZNF428
-0.936142	-0.961687	0.462931	0.901249	-0.74061	1.27426			0.543645	0.285993	0.219757	0.192132	1.23029	M0QY97;Q9UPT8	ZC3H4
-1.44357	-0.145863	-0.888495	0.660492	1.00258	0.814855	+	oe_kk47	1.88074	0.0131601	0.00917598	1.94467	4.24981	M0QYT9;Q14653;M0R205;M0QZB8;M0QZB7;M0R0R8;M0R0X9;M0QXC8	IRF3
-0.826236	-0.200702	-1.42507	0.928375	1.0962	0.427436	+	oe_kk47	1.79982	0.0158555	0.0105684	0.554461	4.02068	M0R0N4;X6R390;M0QYZ2;P53680;M0QZ21;M0R1S0	AP2S1
-1.9641	0.480317	-0.0893271	0.306607	0.694875	0.57163			0.632387	0.233138	0.168664	0.923255	1.40348	M0QZQ2;Q71SY5	MED25
-0.864296	-0.696185	-1.11833	0.605823	1.00473	1.06825	+	oe_kk47	3.14864	0.000710166	0.00139416	0.403824	9.41239	M0QZR4;Q92888;M0QYC1;M0R2C7;M0QYS3;M0QZH8	ARHGEF1
1.92607	-0.831431	0.03566	-0.691359	-0.327581	-0.111364			0.380844	0.41606	0.384445	-0.0401096	-0.906245	M0R0C6;Q92945;A0A087WTP3;M0R0I5;M0QYH3;M0R3J3;M0QXW7;M0R251;M0QYG1;M0R263	KHSRP
1.47449	-0.261981	0.976068	-0.865455	-0.961717	-0.361408	+	oe_kk47	1.24829	0.056456	0.0314793	-0.0668392	-2.65888	M0R0F0;P46782;M0R0R2;M0QZN2	RPS5
-0.187564	-0.893237	1.56905	-0.720445	0.877361	-0.645162			0.13347	0.735411	0.816658	-0.0504201	-0.36237	M0R0P8;Q13459;M0R300;M0QZY4;M0R240;M0QXP0	MYO9B
0.204689	-1.66749	-0.043972	-0.398323	0.634515	1.27058			0.588409	0.257983	0.192245	0.150535	1.31778	M0R165;Q9UBC2;M0R2S2;M0R1V5;M0R3I1;M0QX30;K7EJR2;M0R330	EPS15L1
1.33272	0.801883	0.465385	-1.13624	-0.763089	-0.700654	+	oe_kk47	2.42266	0.00377868	0.00255345	-1.28026	-6.04452	Q16740;M0R208;A0A2R8YEF5	CLPP
0.0097838	-0.416546	1.98829	-0.457359	-0.435465	-0.688699			0.638161	0.230059	0.165176	-0.0527223	-1.41473	M0R2B7;P28340;A0A087WYJ2;M0QZR8;A0A2R8Y7K6;A0A2R8Y705;M0QXE6;M0QXQ2;M0R3H8	POLD1
0.222896	-2.00682	0.653576	0.592452	0.259768	0.278128			0.380865	0.41604	0.384564	0.461807	0.906288	M0R2Z9;Q8IX01;M0R3F6;M0R065;M0R216	SUGP2
-1.18056	-1.13651	-0.158413	1.23081	0.618467	0.626207	+	oe_kk47	1.87277	0.0134039	0.0094573	0.691361	4.22684	M0R3C8;Q96T60;M0QYH2;A0A0D9SFL2;M0QYI1;A0A0D9SFD6;A0A0D9SEV0;M0R000;A0A1B0GU66	PNKP
0.876127	-1.2437	-0.804353	1.41035	-0.0164393	-0.221983			0.400891	0.397291	0.356968	0.163936	0.946936	O00115;K7ENE5	DNASE2
-0.22414	1.34025	1.09092	-0.800425	-0.294988	-1.11162	+	oe_kk47	1.27688	0.0528591	0.0299482	-0.18435	-2.72233	O00116;B7Z3Q4;A0A7P0T984;A0A1B0GWA2;A0A7P0TAL3;A0A2R8YEL0;A0A7P0TAU9;A0A7P0T9C9;A0A7P0T8Q7;A0A7P0TA54;B8ZZ81;A0A7P0T857	AGPS
0.920441	0.163204	1.03988	-0.171773	-0.230686	-1.72107	+	oe_kk47	1.15489	0.0700019	0.0389211	-0.247364	-2.45587	O00148;K7EPJ3;K7EN69;K7ENP6;K7EL56;K7EIL8	DDX39A
0.573316	1.11324	0.905074	-1.2335	-0.969806	-0.388321	+	oe_kk47	2.37228	0.00424346	0.00302579	-0.369426	-5.85594	O00151	PDLIM1
-1.06809	-0.844868	-0.808451	0.783068	0.965555	0.972782	+	oe_kk47	4.22844	5.90963e-05	0.000583784	0.896346	17.7569	O00154;K7EKP8;Q6ZUV0	ACOT7
0.140207	-1.48735	-0.949072	0.633682	0.626504	1.03602	+	oe_kk47	1.43137	0.0370365	0.0207351	0.887558	3.0771	O00161;H3BM38;H3BNE1;H3BR18;H3BPJ0;H3BV99;H3BP15;H3BQY9;H3BNG6;H3BU94;H3BR99	SNAP23
0.515424	-0.891083	-1.60767	0.782755	0.494698	0.705879			0.984634	0.103601	0.0604944	1.22304	2.10044	O00165;E9PIQ7;Q5VYD6	HAX1
-1.28046	-1.15726	0.978321	0.0738296	0.914932	0.47064			0.558589	0.276319	0.210395	0.302235	1.25954	O00178;B0QY59;F5H257;F5H716	GTPBP1
0.823721	1.11989	0.749703	-0.865342	-1.121	-0.706973	+	oe_kk47	3.38924	0.000408094	0.000512141	-0.666224	-10.8594	O00186;REV__H7C070	STXBP3
-0.568244	0.360694	1.81274	-0.363658	-0.197661	-1.04387			0.654655	0.221485	0.158219	-0.204065	-1.44685	O00203;Q13367;A0A590UKC4;A0A2R8Y2A8;A0A5F9UJV3;A0A590UJ60;A0A590UJW5;A0A590UJU0;A0A590UK04;A0A590UJE5;A0A590UKD3;A0A590UJU7;F5GWU4;H0YBD0;A0A590UK30;A0A590UK69;A0A590UJ44;F5GYB0	AP3B1
-0.192791	0.104071	1.94414	-0.729272	-0.506631	-0.619518			0.856251	0.139235	0.0880548	-0.197334	-1.84225	O00231;J3QRY4;J3QS13;J3KSW3	PSMD11
1.50508	0.543905	0.384196	-1.15871	-0.898535	-0.37594	+	oe_kk47	1.74559	0.0179643	0.011313	-0.36763	-3.87192	O00232;J3KTJ5;J3KSK1	PSMD12
-1.19733	-0.697807	-0.777298	0.76373	1.14199	0.766713	+	oe_kk47	3.06105	0.00086886	0.00145576	0.707537	8.93177	O00244;E5RIM7;E5RGN3	ATOX1
-0.37422	-1.02037	-1.21196	0.641112	0.921551	1.04388	+	oe_kk47	2.46441	0.00343234	0.0026487	1.17844	6.20462	O00264	PGRMC1
-1.37969	-0.20086	-0.912988	1.14518	0.706428	0.641928	+	oe_kk47	1.93353	0.0116539	0.00836547	0.414552	4.40411	O00267;M0QYL9	SUPT5H
-1.03454	-0.170726	-1.31391	1.02673	0.689905	0.802545	+	oe_kk47	2.02812	0.00937303	0.00703427	1.38279	4.69066	O00268;A0A0G2JRY5;V9GY14	TAF4
-0.553935	-0.76729	-1.09261	0.0704979	0.8888	1.45454	+	oe_kk47	1.69332	0.0202619	0.0126535	0.286053	3.73198	O00273;K7ERT1	DFFA
-0.919593	-0.997268	-0.801243	0.777827	1.09355	0.846726	+	oe_kk47	4.07619	8.39093e-05	0.000495413	0.609597	16.2504	O00299	CLIC1
1.43034	0.413518	0.725266	-0.773504	-1.05056	-0.745062	+	oe_kk47	2.24976	0.00562652	0.0040496	-0.535467	-5.41747	O00330;H0YD97;E9PLU0;E9PRI6	PDHX
0.620768	-0.0803393	0.602569	0.557475	0.265229	-1.9657			0.386893	0.410305	0.375282	-0.360657	-0.918555	O00401	WASL
-1.01498	-0.953499	-0.678227	0.657351	0.686628	1.30273	+	oe_kk47	2.77715	0.00167051	0.00184252	0.2437	7.5241	O00410;E7ETV3;E7EV12;E7EQT5;E7EWK4;E7EX05;C9JQT6;C9JZD8;E7ETV8;E7ESZ1;C9J875;C9JXE0;C9J583;C9JZ53;F8WF30	IPO5
0.695011	0.915602	1.00633	-1.05072	-1.19261	-0.373608	+	oe_kk47	2.53509	0.00291682	0.00223195	-1.46587	-6.48386	O00418;H3BRH4	EEF2K
0.774021	0.235866	1.00973	0.165073	-0.417069	-1.76763			1.0253	0.0943409	0.0527421	-0.323905	-2.18381	O00422;H7BZW6;U3KPY7;U3KQ12	SAP18
1.39161	0.797035	0.317866	-0.466752	-0.899599	-1.14016	+	oe_kk47	1.98007	0.0104696	0.00757817	-0.451917	-4.54345	O00425;F8WD15	IGF2BP3
-1.85085	-0.0360007	0.687231	1.04105	0.03239	0.126178			0.414578	0.384966	0.340066	0.0956179	0.974553	O00429;F8VZ52;F8W1W3;B4DDQ3;B4DPZ9;F8VUJ9;F8VR28;F8VYL3;H0YHY4;H0YI79	DNM1L
-1.71868	0.248598	-0.66511	0.691019	0.618071	0.826103	+	oe_kk47	1.17086	0.0674745	0.0372404	0.342487	2.49014	O00442;A6NIC1	RTCA
-0.2241	-1.34833	-0.963073	0.889374	0.65214	0.993988	+	oe_kk47	2.09437	0.00804693	0.0060846	1.16121	4.89949	O00461;F8W785	GOLIM4
-1.56029	1.25495	-0.621113	0.399135	0.655121	-0.127801			0.2908	0.511918	0.540603	0.257588	0.718977	O00468;A0A087X208;A0A494C0G5;A0A494C1I6	AGRN
0.615007	1.33161	0.677312	-0.626433	-0.963985	-1.03351	+	oe_kk47	2.58607	0.00259376	0.00221615	-0.557253	-6.69184	O00469;E7ETU9;C9JXZ0;F8WEW3	PLOD2
0.0143441	0.171381	-1.96793	0.755166	0.51487	0.512166			0.791431	0.161648	0.108194	1.70637	1.71418	O00483	NDUFA4
-0.90969	1.54124	0.790297	-0.77819	0.102277	-0.745938			0.535816	0.291195	0.225563	-0.176357	-1.21495	O00487;C9JW37	PSMD14
1.28872	0.669417	0.681517	-0.702955	-0.799415	-1.13728	+	oe_kk47	2.71331	0.00193504	0.00186534	-0.843019	-7.23643	O00499	BIN1
-0.928568	-1.48556	0.0507554	0.578478	0.873335	0.911561	+	oe_kk47	1.57066	0.0268745	0.0155975	0.454716	3.41616	O00505;H0Y4S9	KPNA3
-1.55681	-0.806595	-0.0306365	0.841861	0.700357	0.851819	+	oe_kk47	1.64301	0.0227504	0.0138228	0.863658	3.60037	O00560;B4DHN5;E9PBU7	SDCBP
1.87777	-0.158526	0.132379	-0.498262	-1.04224	-0.31112			0.852749	0.140362	0.0889422	-0.383749	-1.83529	O00566;U3KQ48	MPHOSPH10
0.827134	-0.59999	1.52832	-1.00483	-0.780717	0.0300831			0.769082	0.170184	0.114095	-0.10748	-1.67029	O00567;A0A494C128;Q5JXT2;H0YDU4;H0Y653	NOP56
0.931384	0.908714	0.890914	-0.911494	-1.02571	-0.793804	+	oe_kk47	4.93764	1.15441e-05	0	-3.92133	-26.7881	O00592	PODXL
-0.984847	-0.841668	-0.908694	0.915634	0.877099	0.942475	+	oe_kk47	5.63504	2.31718e-06	0	3.32287	40.0726	O00622	CYR61
-1.38588	-0.288751	-0.819095	0.515855	1.21581	0.762057	+	oe_kk47	1.93418	0.0116364	0.00837149	0.57969	4.40604	O00625	PIR
1.28335	-0.164108	-0.55761	-1.11661	1.17591	-0.620941			0.156959	0.696692	0.783446	-0.0366713	-0.419067	O00743;Q5T1S7	PPP6C
-1.62781	-0.522517	0.385545	0.173994	0.232815	1.35797			0.776796	0.167188	0.112104	0.481572	1.68542	O00754;M0QZ24;M0R174;M0QYZ1;M0R2P5	MAN2B1
-1.31335	-0.391506	-0.902455	0.934532	0.704137	0.968638	+	oe_kk47	2.4694	0.00339313	0.00265696	3.48291	6.224	O00762;A0A0A0MSE8;A0A087WVK1;K4DI81	UBE2C
0.848827	0.202083	1.43143	-1.11222	-0.601377	-0.768749	+	oe_kk47	1.89534	0.0127251	0.00890909	-0.406051	-4.29208	O00764;F2Z2Y4;A8MV33	PDXK
-1.13838	-0.988347	-0.559781	0.82422	0.94681	0.915483	+	oe_kk47	3.26805	0.000539449	0.000877264	2.0898	10.1063	O00767	SCD
-0.507717	-1.51211	-0.466517	0.937491	0.491793	1.05706	+	oe_kk47	1.90878	0.0123373	0.00861888	1.90706	4.33127	O14497;H0Y488;A0A1B0GTU5;A0A087WUV6;H0YEW5;H0YCU6	ARID1A
-0.702548	-1.12581	-0.82849	1.24032	0.634452	0.78208	+	oe_kk47	2.87823	0.00132364	0.00155777	0.593204	8.00039	O14530;B8ZZX4;F8WCJ3;F8WBV5;G3XAJ4	TXNDC9
0.335713	-0.304043	-1.89451	0.447468	0.751291	0.664085			0.863142	0.137043	0.0859152	1.23635	1.85594	O14548;E5RJZ1;H0YBD2	COX7A2L
0.15789	1.4675	0.843084	-0.635592	-1.03265	-0.800231	+	oe_kk47	1.85032	0.014115	0.00967278	-0.38166	-4.16264	O14561;I3L505;H3BNK3	NDUFAB1
-0.102199	0.542984	-1.96594	0.401344	0.698396	0.425413			0.600326	0.251	0.184876	0.696783	1.34102	O14578;A0A7I2V4A6;A0A7I2V4I0;A0A7I2V692;A0A7I2V4H7;H7BYJ3;A0A7I2V365;A0A7I2V2G7;A0A7I2YQJ8	CIT
-1.66061	-0.611831	-0.0872659	0.755931	0.763685	0.840095	+	oe_kk47	1.56242	0.0273892	0.0161306	0.365281	3.39556	O14579;M0QXB4;M0R061	COPE
-0.846417	-0.221529	1.92121	-0.248408	0.0841142	-0.688969			0.261401	0.547771	0.601972	-0.0331802	-0.655777	O14617;A0A2R8Y611;A0A2R8Y4J3;A0A087WYN6;A0A2R8YCY8;K7ELX8	AP3D1
0.119422	-1.78887	-0.447367	0.593703	0.570339	0.952774	+	oe_kk47	1.14585	0.0714743	0.039657	1.85158	2.43655	O14641;I3L2N2;I3L2W9;I3L0M7;I3L0Z8	DVL2
1.6279	0.547177	-0.343213	0.0555723	-1.21615	-0.671283			0.834785	0.14629	0.0943577	-0.291808	-1.7997	O14646;H0Y8V4	CHD1
1.02677	1.21365	0.395593	-0.882659	-0.868805	-0.884541	+	oe_kk47	2.68207	0.00207936	0.00207317	-0.536123	-7.09924	O14657;H0Y7C8	TOR1B
-0.65677	-1.08626	-0.929154	0.69769	1.19855	0.775939	+	oe_kk47	3.05772	0.000875548	0.00145092	1.88893	8.91399	O14672;H3BS53;H0YK87;C9J9B4;H0YNC5	ADAM10
0.9921	0.850276	0.857151	-0.889371	-0.651359	-1.1588	+	oe_kk47	3.51701	0.000304082	0.000585859	-6.07941	-11.7107	O14684	PTGES
-1.12445	-0.745927	-0.842007	0.94871	0.795559	0.96812	+	oe_kk47	3.86294	0.000137107	0.000375	1.19426	14.3479	O14737;K7ESJ4;K7EQA1;Q3HM38;X6R2P6	PDCD5
1.33744	1.12853	-0.367229	-0.801108	-1.04827	-0.24936	+	oe_kk47	1.12199	0.075511	0.0420419	-0.255982	-2.38582	O14744;G3V580;H0YJX6;G3V5L5;G3V2X6;C9JSX3;G3V2L6;H0YJD3;H7BZ44;H0YJ77;G3V507;G3V2F5;G3V5T6	PRMT5
1.63869	0.806918	-0.523302	-0.820172	-0.785253	-0.316885			0.920715	0.120029	0.0725075	-0.314932	-1.97102	O14745;J3QRP6;J3QRA3	SLC9A3R1
-1.39059	-0.67433	-0.266307	1.28433	0.937642	0.109261	+	oe_kk47	1.50105	0.0315464	0.0180993	1.62221	3.24427	O14777;I3L4G3;V9GYM9	NDC80
1.46027	0.571089	0.0635787	-1.47769	-0.594436	-0.022815	+	oe_kk47	1.11707	0.0763713	0.0424658	-0.335565	-2.37538	O14802;Q7Z755	POLR3A
0.309651	0.873384	1.29456	-0.523097	-0.601913	-1.35259	+	oe_kk47	1.87966	0.0131929	0.0092295	-0.525997	-4.24669	O14818;H0Y586;Q8TAA3;A0A087WYS6;F5GY34	PSMA7
0.823206	-0.655972	-1.69161	0.602138	0.112808	0.809432			0.599819	0.251293	0.184892	0.236695	1.34003	O14828	SCAMP3
-1.18184	-0.888398	-0.401249	1.08809	1.19775	0.185647	+	oe_kk47	1.85989	0.0138073	0.00952772	0.58958	4.18992	O14880;Q5VV89;Q5VV87	MGST3
-0.558264	-1.6635	0.418039	1.09851	0.734023	-0.0288074			0.809916	0.154912	0.101944	0.24607	1.75058	O14908;K7EM11;K7ESN1;K7ELJ2	GIPC1
-0.998823	-0.590897	-1.10403	0.982385	0.90483	0.806539	+	oe_kk47	3.39765	0.000400267	0.000516704	2.25895	10.9136	O14925;Q5SRD1	TIMM23
-0.863558	-1.07461	-0.769817	0.980631	1.02699	0.700362	+	oe_kk47	3.7284	0.000186896	0.000718266	0.583104	13.2607	O14929;F8W9G7;F8WEW1	HAT1
-1.28212	0.038405	-0.847087	1.5127	0.590533	-0.012434	+	oe_kk47	1.11174	0.0773143	0.0429229	0.220159	2.36412	O14949	UQCRQ
0.431982	-0.738031	-1.44295	0.904143	-0.288987	1.13384			0.76378	0.172274	0.115773	0.201366	1.65989	O14974;F8VZN8;H0YIM2;H0YIS3;H0YIS4;H0YHI8;A0A3B3ISH4;F8VW28;A0A0U1RQZ1;H0YHL8	PPP1R12A
0.678841	0.809718	0.802093	-1.42724	-1.07608	0.212664	+	oe_kk47	1.42084	0.0379455	0.0214205	-2.363	-3.05223	O14975;G3V1R7	SLC27A2
-0.591555	1.13545	1.24136	-1.04315	0.106596	-0.848709			0.79403	0.160683	0.107225	-0.207371	-1.71929	O14980;A0A7I2V2Y6;A0A7I2V461;A0A7I2V3P3;A0A7I2YQV4;A0A7I2V2H0;A0A7I2V3W6;A0A7I2V2S3;A0A7I2V3N0;A0A7I2YQX3;A0A7I2V4A3;A0A7I2V6B9;A0A7I2V488;C9JKM9;C9J673;A0A7I2V3J1;A0A7I2YQP1;A0A7I2V2C5;A0A7P0Z4B7;F8WF71;C9IYM2;A0A7I2V396	XPO1
1.18608	0.834544	0.533144	-0.89722	-1.29487	-0.361685	+	oe_kk47	2.17526	0.00667944	0.00507407	-0.652387	-5.16401	O15027;F1T0I1;A0A3F2YNZ0;A0A3F2YNX0;X6RGP5;A0A0C4DH09;Q8N9G1	SEC16A
-0.874574	0.737646	1.56355	-0.991277	-0.508303	0.072961			0.538667	0.28929	0.223412	-0.528545	-1.22054	O15031;E2PU09;A6QRG9;A6QRH1;H0Y6J7	PLXNB2
1.39716	-0.179733	-0.714321	-0.546065	-1.02882	1.07179			0.138144	0.727539	0.810163	-0.0349681	-0.373776	O15042;E7ET15;H0Y8D9;E7EW00;H7C4V2;C9JDJ7;C9J5L1;U3KPT1	U2SURP
-0.928284	-0.819904	-0.983005	1.00362	0.874792	0.852778	+	oe_kk47	4.95849	1.1003e-05	0	4.43691	27.1131	O15066	KIF3B
0.642688	-0.0291888	-0.87682	-1.04691	-0.310004	1.62024			0.0674158	0.856218	0.905845	0.0140101	0.193198	O15067;H0YGH1;J3QSG0;J3QSH6;J3KT98;J3KTL4;J3QL39;J3KTQ5	PFAS
-1.90174	0.111801	-0.164702	0.435672	0.771547	0.747426			0.953928	0.111192	0.0656088	0.818871	2.03804	O15084;B4DIW9;H7C4A0;H7C209;A0A2R8Y7Y4;Q8N8A2	ANKRD28
-0.39781	-1.17939	-0.905407	0.977617	0.231532	1.27346	+	oe_kk47	1.89621	0.0126996	0.00893408	1.05559	4.29462	O15091;A0A0A0MTQ0	KIAA0391
0.473116	1.17714	1.00384	-0.786923	-1.03462	-0.832545	+	oe_kk47	2.84951	0.00141413	0.0018025	-1.00554	-7.86239	O15118;K7EQ23	NPC1
-1.37477	-1.09896	0.162949	0.625763	1.02209	0.662928	+	oe_kk47	1.45966	0.0347008	0.0194072	1.63222	3.14438	O15121	DEGS1
0.136036	-0.218754	-1.65623	1.27547	-0.245913	0.709397			0.755608	0.175546	0.118715	0.394536	1.64388	O15126;A0A087WXB0;A0A087WTX8;A0A087WZA6;A0A087WU14	SCAMP1
0.514812	0.229913	-2.00267	0.115287	0.519935	0.622726			0.444359	0.359452	0.305722	0.516184	1.03424	O15127;H3BV04;H3BN93;H3BUB6;H3BPL9	SCAMP2
-1.13457	-0.785083	0.120943	-0.556029	1.16769	1.18705			0.80557	0.15647	0.103346	0.33327	1.74201	O15143;C9JEY1;C9K057;C9JBJ7;F8VXW2;C9JTT6;C9JM51;F8WEB3	ARPC1B
-0.723737	-0.713827	-1.18013	0.998124	1.1746	0.444969	+	oe_kk47	2.54044	0.00288111	0.00213831	0.505133	6.5054	O15144;C9JTV5;G5E9J0;H7C3F9;G5E9S7	ARPC2
-0.951017	-0.735048	-0.918012	1.32853	0.378907	0.896637	+	oe_kk47	2.44846	0.00356074	0.00260816	0.815148	6.14305	O15145;C9JZD1;F8VR50	ARPC3
-0.496077	1.98375	-0.30328	-0.326067	-0.0741935	-0.784128			0.407015	0.391728	0.349384	-0.15948	-0.959308	O15160;E7EQB9;A0A2R8YEZ4;A0A2R8Y5D3;A0A2R8YEY5;A0A2R8Y8D6;D6RDJ3;H0Y723	POLR1C
-0.681869	-1.39386	-0.303378	1.36164	0.255292	0.762179	+	oe_kk47	1.607	0.0247172	0.0145331	0.878438	3.50797	O15164	TRIM24
0.686157	0.554689	0.836817	-1.05675	-1.48087	0.459954	+	oe_kk47	1.09506	0.0803415	0.0444945	-2.0294	-2.32898	O15173;U3KQM0	PGRMC2
-0.199458	-1.35675	-0.842873	1.32264	0.738535	0.337907	+	oe_kk47	1.65555	0.0221029	0.0134635	0.566628	3.6329	O15212;A2AB88	PFDN6
-1.47778	1.20534	0.839182	-0.166344	-0.7252	0.324804			0.158631	0.694015	0.780958	-0.0615196	-0.423046	O15213;H0Y6G3	WDR46
0.270865	-0.583956	-0.998805	0.290825	-0.710559	1.73163			0.473133	0.336409	0.277051	0.0940259	1.09145	O15226	NKRF
-0.181508	0.062517	0.402324	0.741051	0.85299	-1.87737			0.0729554	0.845366	0.897935	-0.100392	-0.208034	O15228;Q5TBH8;A0A2R8YH69;Q5TBH6	GNPAT
0.295463	1.08778	0.967757	-0.146825	-1.51568	-0.688499	+	oe_kk47	1.54317	0.0286306	0.0167209	-0.219278	-3.34768	O15230;A0A087WYH7;A0A075B783;A0A0A0MSA0;Q16787	LAMA5
-1.67242	-0.634326	0.128515	1.07869	0.460197	0.639341	+	oe_kk47	1.23269	0.0585208	0.0324297	0.543427	2.62452	O15235	MRPS12
-0.956591	-0.903797	-0.876581	0.945501	0.918508	0.872961	+	oe_kk47	6.26768	5.39908e-07	0	3.1853	57.7085	O15258;Q5T092;A0A0A0MR06;Q5T091;Q5T093	RER1
-1.39708	0.489503	-0.995707	1.25463	0.452096	0.196559			0.901821	0.125366	0.0760655	0.499209	1.93311	Q5T8U5;O15260;B7Z1G8	SURF4
0.105296	-0.417249	0.0785726	1.86341	-0.752298	-0.877729			0.0592435	0.872482	0.915849	0.0283057	0.171059	O15269;A0A2R8Y4S0;A0A2R8Y6A2	SPTLC1
-1.87994	0.656759	-0.0916179	0.480452	0.890027	-0.0556755			0.474719	0.335182	0.276434	0.17285	1.0946	O15270;H0YJV2	SPTLC2
0.793817	0.792361	0.873123	-0.507988	-1.61511	-0.336199	+	oe_kk47	1.82181	0.0150727	0.0101969	-0.300704	-4.08209	O15294;C9JZL3	OGT
0.987405	0.774466	0.863583	-0.514723	-0.749651	-1.36108	+	oe_kk47	2.59762	0.00252569	0.00208219	-0.900192	-6.73976	O15305;H3BV55;H3BRM0;A0A804HKA7;H3BPH4;H3BR08;H3BM92;H3BV34;H3BT06;H3BNY9;Q92871	PMM2
1.9522	-0.414212	-0.120483	-0.894294	-0.443514	-0.0796994			0.53323	0.292934	0.22773	-0.187303	-1.20988	O15347;E7ES08;E7EQU1;E9PES6	HMGB3
1.47739	-0.370482	-0.822666	0.852638	-0.00717672	-1.1297			0.0732089	0.844872	0.898009	-0.014286	-0.208709	O15355	PPM1G
1.02893	0.665559	0.978897	-0.758526	-1.21372	-0.701143	+	oe_kk47	3.07365	0.000844015	0.00148299	-4.07122	-8.99949	O15357;A0A0A0MTP6;F5GY16;H0YFZ4;H7BXR2;F5H588;H0Y5Q9;Q92835	INPPL1
-1.22466	0.587246	-1.26939	0.228963	1.04389	0.63395			0.905276	0.124372	0.0754741	0.199873	1.94003	O15371;B0QYA5;B0QYA6;B0QYA8;B0QYA4;A0A0D9SGB5	EIF3D
-1.59378	0.175748	-0.790036	1.07135	0.642327	0.494392	+	oe_kk47	1.27852	0.0526599	0.0297895	0.948605	2.72601	O15379;E7ESJ6;E7EW19	HDAC3
0.00554233	0.515708	1.52995	-0.0122847	-0.622888	-1.41603	+	oe_kk47	1.06248	0.0866004	0.0482537	-0.49774	-2.26084	O15381;F8WF01;E9PGD8;E7EWK7;E9PH71	NVL
-0.739544	0.317183	1.49268	0.424677	-1.39035	-0.104641			0.352997	0.443612	0.430297	-0.191827	-0.849189	O15397;F5H2I3;F5H244;H0YH64	IPO8
-0.426574	-1.01588	-1.20343	0.842599	0.870982	0.932304	+	oe_kk47	2.76949	0.00170024	0.00182812	1.51811	7.48903	O15400	STX7
-1.21365	-0.585164	-0.877286	0.779262	1.01459	0.882246	+	oe_kk47	3.11036	0.000775604	0.001338	0.95737	9.19946	O15439;A0A2R8YDC1;A0A2R8Y6V8	ABCC4
0.320499	-1.10039	-1.37839	0.407576	0.665726	1.08497	+	oe_kk47	1.20342	0.0626008	0.0343416	0.76542	2.56057	O15446	CD3EAP
-1.41511	-0.370893	-0.692717	0.589352	0.592668	1.2967	+	oe_kk47	1.88336	0.013081	0.00910927	0.336444	4.25736	O15460;E7ENX0;E7EPI9;C9JN43;C9JIG4;C9JCP0;C9JX45;A8MXE0;E7ERI1	P4HA2
-0.159787	-1.3286	-1.03035	0.691304	0.911995	0.915438	+	oe_kk47	2.0264	0.00941022	0.00702357	0.776801	4.68535	O15511;B1ALC0	ARPC5
0.785484	-0.044654	-1.89501	0.461903	0.756624	-0.064352			0.392266	0.40526	0.369415	0.143051	0.929467	O15514;E9PB93;E9PHV4	POLR2D
-0.504035	0.566452	1.6652	-0.534266	-0.0245236	-1.16883			0.746498	0.179268	0.121462	-0.125857	-1.62604	O43143	DHX15
-1.13103	0.583378	0.261154	-1.11179	-0.042	1.44028			0.0738363	0.843653	0.89758	0.0256945	0.210381	O43148;K7EP06;K7ERH6	RNMT
-1.96551	0.553179	-0.0815395	0.648599	0.27062	0.574646			0.580159	0.262931	0.196534	0.579062	1.30168	O43156	TTI1
1.09053	0.660624	0.428675	-1.7536	-0.102172	-0.324062	+	oe_kk47	1.23507	0.0582009	0.0322686	-1.13265	-2.62977	O43159;E9PPY3;E9PPP6;E9PS87	RRP8
1.13566	0.880608	0.576299	-1.35552	-0.625342	-0.611708	+	oe_kk47	2.37781	0.00418977	0.00295669	-0.781958	-5.87639	O43172	PRPF4
-0.71647	0.504284	-1.72389	0.727707	0.582431	0.625936			0.934678	0.116231	0.0697651	2.6673	1.99914	O43181;H0Y9M8	NDUFS4
-0.976743	-0.846913	-0.632264	0.186588	1.53417	0.73516	+	oe_kk47	1.81154	0.0154333	0.0102576	0.390196	4.05334	O43237;J3KRI4;B4E2E0;J3KRZ2;H3BUM4;J3KSD2	DYNC1LI2
-1.31852	0.956353	0.142743	1.10411	0.156035	-1.04073			0.0554803	0.880075	0.919511	0.0142733	0.16076	O43242;H0YGV8	PSMD3
1.44819	0.205612	0.699355	-0.251957	-0.826602	-1.2746	+	oe_kk47	1.5479	0.0283204	0.0167044	-0.117872	-3.3594	O43252	PAPSS1
-0.911616	-1.02245	-0.634942	1.0285	0.282408	1.2581	+	oe_kk47	2.24918	0.00563404	0.00404602	0.509399	5.41543	O43264;F5H3C1	ZW10
-0.136369	0.320266	-1.88187	0.862552	0.0681052	0.767315			0.723186	0.189153	0.129401	0.176581	1.58047	O43290;E9PQI8	SART1
-0.723149	-1.63273	0.0269696	0.741039	0.774711	0.813155	+	oe_kk47	1.49624	0.0318977	0.0180879	1.5272	3.23256	O43294;H3BQC4;H3BSN4	TGFB1I1
-0.354773	-0.160469	-0.182464	1.8784	-1.13334	-0.0473529			0.203343	0.626119	0.709378	0.0407372	0.526919	O43324;D6RBD7;C9J1V9;H0YAL7;D6RCQ0;H0YAH9	EEF1E1;EEF1E1-BLOC1S5
-0.235389	1.1967	1.28868	-0.565271	-0.604546	-1.08018	+	oe_kk47	1.34766	0.0449097	0.0255635	-0.399931	-2.88229	O43390;B4DT28;A0A6Q8PH31;A0A6Q8PEX7;A0A6Q8PH35;A0A6Q8PHG0;A0A286YEZ8;A0A7I2V2F0	HNRNPR
1.01677	0.922332	0.495775	-0.0998691	-0.90908	-1.42593	+	oe_kk47	1.75035	0.0177685	0.0111724	-0.403239	-3.88482	O43395	PRPF3
1.22147	-1.37316	-1.0552	0.429757	0.494252	0.282878			0.418216	0.381754	0.336368	0.145671	0.981873	O43396;K7ER96;K7EML9;K7EME7;K7EPB7;K7EKG2	TXNL1
1.22709	-1.19464	-0.344128	0.289643	-0.954515	0.976549			0.080909	0.830025	0.887174	0.0356083	0.229105	O43399;A0A087WYR3;A0A087WZ51	TPD52L2
-1.19039	-0.59061	-0.678225	1.0435	1.2923	0.123416	+	oe_kk47	1.82157	0.015081	0.0101901	0.204154	4.0814	O43402;M0R1B0	EMC8
-1.55934	0.0922742	-0.742642	0.346668	1.20793	0.65511	+	oe_kk47	1.28111	0.0523468	0.0296804	0.105171	2.73178	O43504;R4GMU8;E9PLX3;A0A0C4DGV4	LAMTOR5
1.62056	-0.307634	-1.06045	0.0386898	-0.890805	0.599634			0.0644413	0.862102	0.90842	-0.034839	-0.185175	O43583;F8VVL1	DENR
0.951726	0.659166	1.05633	-1.06937	-0.55017	-1.04768	+	oe_kk47	2.9955	0.00101042	0.00138854	-0.340174	-8.58702	O43592;F8WDU6;F5GYW6;F5GZM3	XPOT
0.462915	1.09928	1.10048	-0.872236	-0.858982	-0.931452	+	oe_kk47	2.94203	0.0011428	0.00149153	-0.599272	-8.31487	O43615;M0QXU7;M0R301;M0QXM9;M0R124	TIMM44
-1.23037	0.207988	-0.480133	0.316347	-0.50438	1.69054			0.585674	0.259613	0.193611	0.105508	1.31244	O43617;A0A087WWM0;A6NKE1;A0A087WYS5	TRAPPC3
-0.299245	-0.153208	-1.28603	0.0562846	-0.111542	1.79374			0.755229	0.1757	0.118713	0.265809	1.64314	O43633;M0R1L7;M0R1T5;M0QXX8	CHMP2A
0.64037	0.989844	0.966125	-0.846104	-0.411877	-1.33836	+	oe_kk47	2.40031	0.00397823	0.00258228	-3.18363	-5.96025	O43653	PSCA
-1.03427	0.806286	-1.38531	0.23236	0.26999	1.11095			0.660396	0.218577	0.155061	0.110448	1.45803	O43660;D6RA26;H0YA24;B7Z982	PLRG1
-0.596385	-0.472804	-1.49212	0.842532	0.798556	0.920221	+	oe_kk47	2.21101	0.00615163	0.00433735	2.08304	5.28443	O43663;H0YL53;H0YM42;H0YLA0;G3V3N7;H0YNE4	PRC1
-1.12862	-0.832016	-0.701083	1.2177	0.629616	0.814402	+	oe_kk47	2.93124	0.00117155	0.00147112	0.900692	8.2609	O43676;C9JKQ2	NDUFB3
0.510588	-0.159928	-1.9616	0.516073	0.53871	0.556157			0.658721	0.219421	0.156149	1.38938	1.45477	O43678	NDUFA2
0.711291	0.964436	1.03186	-0.85928	-0.761825	-1.08648	+	oe_kk47	3.71724	0.000191761	0.000713846	-1.04839	-13.1741	O43681	ASNA1
-1.67269	-0.625619	0.235845	1.09551	0.692561	0.274392	+	oe_kk47	1.07619	0.0839093	0.0468392	0.297992	2.28943	O43709;H7C170;F8WD87;F8WD67;E9PCQ7	WBSCR22
1.58217	0.722275	-0.0263676	-1.16036	-0.599373	-0.518339	+	oe_kk47	1.39749	0.0400415	0.0226053	-0.93622	-2.99749	O43715	TRIAP1
0.803244	1.04604	0.565936	-1.56544	-0.678514	-0.171268	+	oe_kk47	1.69695	0.0200932	0.0125368	-0.946187	-3.7416	O43719;Q5H919;Q5H918	HTATSF1
-1.29809	-0.512981	-0.693975	1.29657	0.88611	0.322376	+	oe_kk47	1.97469	0.0106001	0.00775642	0.433959	4.52719	O43747;H3BNR4;H3BR36;H3BUN9;H3BRM7;H3BN71;B4DGE1;H3BS13;H3BV30;H3BN75;B3KNW1	AP1G1
-1.39103	-0.262141	-0.796291	0.382609	1.23333	0.833521	+	oe_kk47	1.79227	0.0161336	0.0104993	0.191806	3.99975	O43776;K7EIU7;K7EJ19;K7EQ35;K7EPK2;K7EMQ6	NARS
0.543435	0.684062	1.19722	-1.07167	-0.0684301	-1.28462	+	oe_kk47	1.72232	0.0189531	0.0119196	-1.50268	-3.8092	O43805;A0A087WV26	SSNA1
-1.01152	0.737369	-1.41912	1.09113	0.454931	0.147209			0.719559	0.19074	0.130493	0.127477	1.57338	O43809;H3BND3;H3BV41	NUDT21
-0.0669385	0.254934	1.62653	-1.0753	0.284378	-1.02361			0.819368	0.151577	0.0982493	-0.0917619	-1.76922	O43813;E9PHS0;F8WDS9;H7C2E3	LANCL1
-0.0206031	-0.680849	-1.62896	0.569138	0.942088	0.819185	+	oe_kk47	1.49935	0.0316701	0.0181178	2.14563	3.24013	O43815	STRN
-1.59575	1.36251	0.196166	-0.130368	-0.42992	0.597367			0.00891039	0.979692	0.986767	0.00203578	0.0270813	O43818	RRP9
1.31004	0.529257	0.679166	-1.3468	-0.44062	-0.731043	+	oe_kk47	2.02531	0.00943387	0.0071155	-0.356127	-4.68198	O43852;H0Y875	CALU
0.839243	0.966275	0.676307	-0.346234	-1.56996	-0.565629	+	oe_kk47	1.89361	0.0127759	0.00897071	-1.70136	-4.28707	O43854	EDIL3
1.17767	0.916133	0.586543	-0.981794	-0.741333	-0.957219	+	oe_kk47	3.17122	0.000674186	0.00119403	-1.28159	-9.54008	O43865	AHCYL1
-1.23561	-1.32353	0.752415	0.398272	0.654604	0.753847			0.812526	0.153983	0.100677	0.420385	1.75572	O43896	KIF1C
-1.29724	-1.11781	0.316906	0.167908	0.770011	1.16023	+	oe_kk47	1.12122	0.075645	0.0420676	0.525019	2.38419	O43913;G3V0H0	ORC5
-0.899834	-1.495	0.0180558	0.900559	0.573305	0.902916	+	oe_kk47	1.60151	0.0250317	0.0146113	0.448809	3.49402	O43920	NDUFS5
-1.99203	0.281285	0.113166	0.475433	0.355819	0.766325			0.649309	0.224229	0.160083	0.897401	1.43644	O43929;C9JGH7;C9J2X8;Q53SE3;Q5THS9;CON__Q2YDI2;Q96NJ5	ORC4
1.22906	0.236003	0.753689	-0.326252	-1.64211	-0.250384	+	oe_kk47	1.29558	0.0506314	0.0284779	-0.45658	-2.7642	O60216;E5RJW1;E5RJK5;E5RFZ5;E5RFV8;E5RIN7;E5RI01;E5RG18;A0A804HJ87;Q9H4I0;A0A140T8W2	RAD21
-1.51833	-0.797861	-0.138764	0.924635	0.84557	0.684754	+	oe_kk47	1.80865	0.0155364	0.0103587	1.39971	4.04526	O60220;A0A2R8YDA8	TIMM8A
-1.5353	0.184275	-0.888537	0.65536	1.05195	0.532249	+	oe_kk47	1.3299	0.0467843	0.0265098	0.354351	2.84175	O60231;A0A140T947;Q5SQH5;A0A140T8Y5;A0A140T9T4;A2AB15	DHX16
-1.89863	0.241611	1.01837	0.308502	0.439008	-0.108868			0.182737	0.656543	0.743577	0.112771	0.479622	O60244;H7C3E5;H7C017	MED14
-1.69059	-0.481435	0.620105	1.2111	0.189936	0.150877			0.61804	0.240968	0.17496	0.166271	1.37554	O60256;E7EPA1;C9JJS3;C9K0K7;I3L0S1;C9JDU5;C9JDH0;E7EW35;I3L331;I3L164;I3L4G9	PRPSAP2
1.08011	0.0396557	1.30099	-0.537579	-0.745337	-1.13784	+	oe_kk47	1.71165	0.0194245	0.0123179	-0.168414	-3.78068	O60264	SMARCA5
0.471016	1.14268	0.952471	-0.379149	-0.971183	-1.21584	+	oe_kk47	2.2349	0.00582237	0.00420351	-0.564714	-5.36613	O60287	URB1
-1.19369	-0.770923	-0.736984	0.874005	0.870646	0.956942	+	oe_kk47	3.56406	0.00027286	0.000617021	4.04536	12.0399	O60292;M0R2Q7	SIPA1L3
0.493525	1.00334	0.92339	-1.41603	-0.0618163	-0.942402	+	oe_kk47	1.7103	0.019485	0.01238	-1.17309	-3.77707	O60294	LCMT2
-1.68937	0.111676	1.351	0.109156	0.439241	-0.321707			0.0574362	0.87612	0.917474	0.0163606	0.166121	O60306;H0YH15;H0YLN9	AQR
-1.61847	-0.42177	-0.201475	0.328986	1.29147	0.621255	+	oe_kk47	1.33352	0.0463959	0.0264839	0.376678	2.85	O60313;A0A2R8Y3X5;A0A2R8YE78;A0A2R8YDM2;C9JMB8;E5KLJ9;A0A2R8YFD1;A0A2R8YGE5;A0A2R8YD53;A0A2R8Y4Q3;A0A2R8Y4G4;A0A2R8YE54;H7C141;C9JY58;H7C3G2;A0A2R8Y5G3	OPA1
-1.1228	-1.29524	0.528778	0.792668	1.07388	0.0227105			0.888188	0.129364	0.0797349	0.175807	1.90585	O60341;R4GMQ1;R4GMP9	KDM1A
0.845955	-1.11154	-1.27383	0.82864	-0.138052	0.848824			0.609708	0.245636	0.179373	0.298899	1.3593	O60343;A0A3B3IRT3;Q5JU47	TBC1D4
-0.688603	0.619931	1.76942	-0.728478	-0.546652	-0.425618			0.725339	0.188218	0.128486	-0.326927	-1.58467	O60427;A0A0A0MR51;F5H3P6;F5H3U5;H7C2V0;F5H8G5;H0YB97;F5H852;F5GWE3	FADS1
1.1047	0.464599	0.710879	0.148984	-1.00746	-1.42171	+	oe_kk47	1.40136	0.0396862	0.0224772	-0.877929	-3.00652	O60443;C9JSR4;H7C147;H7BZJ0	DFNA5
0.229638	-1.85336	-0.146952	0.148672	1.08774	0.534268			0.781716	0.165304	0.110733	0.213764	1.69509	O60488;A0A804HI36;D6RF95;H0Y9A0;D6RDA8	ACSL4
-0.687927	-0.717228	-1.21308	1.23367	0.518616	0.865952	+	oe_kk47	2.5443	0.00285562	0.00215011	0.648329	6.52099	O60493	SNX3
-0.20211	-1.87817	0.097141	0.928678	0.5708	0.483663			0.984425	0.103651	0.0604692	0.987783	2.10002	Q5U8S2;O60499;K7ELY2;X6R2W0;K7EIY4;K7EPP9;K7EJ05;K7EQ84;F6RTM7;K7EK75	STX10
-1.20817	-0.91785	-0.46223	0.797512	1.24524	0.5455	+	oe_kk47	2.35272	0.00443895	0.00340169	0.571625	5.78406	O60502;H7C3X0	MGEA5
0.207572	0.314862	-1.9738	0.0933999	0.803789	0.554173			0.553651	0.279479	0.213083	0.686512	1.24988	O60504;H0YAZ3;H0YB51;E5RJP2;E5RIA0	SORBS3
-1.3504	1.07765	1.1614	-0.176349	0.0805811	-0.792874			0.275435	0.530353	0.572235	-0.0811729	-0.686097	O60506;A0A7I2V4Z0;A0A7I2V309;A0A7I2V5Q6;A0A7I2V2F2;F6UXX1;A0A7I2V4J0	SYNCRIP
-1.65595	0.365803	-0.154292	0.408167	1.3538	-0.317523			0.549429	0.282209	0.215289	0.143117	1.24162	Q5SRN1;O60508	CDC40
1.11301	-1.00664	0.722663	-0.0103321	-1.38156	0.56286			0.251975	0.55979	0.620476	-0.0497392	-0.635248	O60518;A0A096LNS2;A0A096LPA6	RANBP6
0.687183	0.953523	1.05338	-0.821832	-1.13724	-0.735014	+	oe_kk47	3.40407	0.000394394	0.000522523	-0.882255	-10.9551	O60547	GMDS
1.22517	0.142378	0.909217	-1.08793	0.02273	-1.21157	+	oe_kk47	1.3951	0.0402624	0.0227513	-0.544155	-2.99191	O60563;A0A1W2PQ16;F8WDY7;F2Z2C9;O60583	CCNT1
-0.646539	-1.18037	-0.867903	0.968517	0.802367	0.923927	+	oe_kk47	3.41832	0.000381663	0.000533333	1.5053	11.0478	O60566;H0YN44	BUB1B
-0.361423	-1.40978	-0.740883	0.678653	1.2263	0.607137	+	oe_kk47	2.00087	0.00997999	0.00735176	0.332089	4.60676	O60568;H7C2V1;H7C2S8;H7C0B8	PLOD3
-0.0489566	-1.48347	-0.861375	0.556458	0.749307	1.08804	+	oe_kk47	1.64244	0.0227803	0.0138145	1.92814	3.5989	O60573;B8ZZL3;C9JEL3;B9A044;B8ZZ50;B4E1E4;B9A023	EIF4E2
0.225295	-0.884924	-1.50775	0.765076	0.298503	1.1038	+	oe_kk47	1.21665	0.0607226	0.0333384	0.225724	2.58939	O60664;K7ERZ3;K7EL96;K7ER39;K7EJD0	PLIN3
-0.94227	1.19726	1.34403	-0.47986	-0.470805	-0.648352			0.650318	0.223708	0.159549	-0.41676	-1.43841	O60678	PRMT3
-1.66322	-0.352498	1.11697	0.915607	-0.116527	0.0996678			0.279504	0.525407	0.563395	0.0710182	0.694835	O60684;Q5TFJ7;O15131;S4R3E5	KPNA6
0.894868	0.834512	1.00385	-0.867045	-0.901493	-0.964692	+	oe_kk47	5.2372	5.79162e-06	0	-0.785845	-31.8511	O60701;E7ER95;E7ER83;E7ETF4;E7EV97;D6RHF4;E9PBD2	UGDH
0.0777452	-0.645518	-1.63506	1.10115	0.345358	0.756325	+	oe_kk47	1.27029	0.0536673	0.0303797	0.329788	2.70765	O60749;D6RC15	SNX2
-1.20769	0.420539	-0.91408	-0.392798	0.745087	1.34894			0.725714	0.188055	0.128382	0.152917	1.58541	O60763;REV__R4GMN2	USO1
-1.97582	0.691702	-0.0298915	0.511327	0.272561	0.530124			0.474287	0.335516	0.276439	0.19538	1.09374	O60784;V9GYF4;B0QY02;V9GZ68;B0QY01;H7BYN7	TOM1
0.403738	1.3858	0.171173	0.184368	-0.546908	-1.59817			0.960321	0.109567	0.0642782	-0.117527	-2.05099	O60825;F6RAZ1;Q4VBA9;F6XNB3;A0A1W2PNV9	PFKFB2
-1.05954	-1.38706	0.0413066	0.907782	0.805304	0.692208	+	oe_kk47	1.67124	0.0213187	0.0131404	0.699095	3.67385	O60826	CCDC22
1.3887	-0.736749	-0.182381	-1.26294	-0.144482	0.937852			0.127653	0.745327	0.823983	-0.0524	-0.348079	O60828;A0A5H1ZRR1;H7C053	PQBP1
1.04576	0.972601	0.681045	-0.703108	-0.928707	-1.06759	+	oe_kk47	3.51434	0.000305957	0.000584383	-0.531761	-11.6923	O60832;C9IYT0;H7C0M1;H7C2Q9;H7C2Q2;H7BZF2	DKC1
1.21318	0.74578	0.719437	-0.924976	-1.05222	-0.701201	+	oe_kk47	3.1427	0.000719946	0.00137658	-0.735636	-9.37904	O60869	EDF1
-0.923806	-0.12836	1.48345	0.94723	-0.486691	-0.891828			0.115926	0.765727	0.84005	-0.017458	-0.318948	O60884;A0A087WT48;I3L320	DNAJA2
-0.0604412	-1.726	-0.425213	0.469138	0.649683	1.09283	+	oe_kk47	1.28421	0.0519745	0.0294276	0.256762	2.7387	O60885;M0QZD9;M0R0H4;M0QYW0	BRD4
-1.10027	-0.338695	1.3367	0.573254	0.615509	-1.0865			0.0250221	0.944013	0.964683	0.00688426	0.0747365	O60927;Q5SRK2	PPP1R11
-0.570618	-0.0217436	-0.85435	-0.13812	-0.362808	1.94764			0.55081	0.281313	0.214728	0.14824	1.24432	O60934;A0A0C4DG07;E5RGU1;E2QRP0;A0A087X1V5;E5RGN7;E5RGR7	NBN
-0.633749	-0.273052	-1.45744	0.47985	1.38602	0.49837	+	oe_kk47	1.57262	0.0267535	0.0154355	0.239105	3.42108	O75083;D6RD66	WDR1
1.16084	0.347251	1.10986	-0.942984	-0.773786	-0.901178	+	oe_kk47	2.54223	0.00286926	0.00214774	-0.458416	-6.51264	O75116;E9PF63;Q14DU5;D6REE7;C9JFJ0	ROCK2
-0.918333	-0.787613	-1.01848	0.828965	0.859801	1.03566	+	oe_kk47	4.3959	4.01883e-05	0.000744828	1.35747	19.5719	O75131;A0A087WYQ3;E5RHZ0;A0A087WXR6;H0YB26;A0A087WUS8;E5RFT7;A0A0G2JMP5;Q96A23	CPNE3
1.25726	0.895858	0.319767	-0.989493	-0.275228	-1.20816	+	oe_kk47	1.86436	0.013666	0.00954078	-0.187632	-4.20271	O75150;H3BP71;H3BS50;A0A087WTK2;H3BQ99;H3BUL6;I3L332	RNF40
-0.990836	-1.33188	1.22058	-0.108579	0.53529	0.675428			0.36762	0.428924	0.405418	0.128846	0.879233	O75165;A0A3B3IRM0;H0YA63;H0Y8Q2	DNAJC13
-1.18493	-1.26407	0.00724108	0.840211	0.870035	0.73151	+	oe_kk47	1.76986	0.0169879	0.010776	1.66718	3.93803	O75170;A0A0A0MSJ8;T1ECW5	PPP6R2
1.485	-0.632243	0.379631	-0.398124	0.516786	-1.35105			0.431147	0.370555	0.32014	-0.291935	-1.00782	O75208;H3BNT2;H3BPY0;H3BRC0;H3BSJ5;H3BPW3;H3BVA5;H3BPC6	COQ9
0.877409	1.0864	0.651031	-0.907859	-1.26878	-0.438199	+	oe_kk47	2.52033	0.00301766	0.00233693	-0.782656	-6.42467	O75223;B8ZZK2;M0QZK8;H7BZK5;A0A0B4J1Y4	GGCT
-0.086992	-1.35217	-1.04634	0.752174	0.841635	0.891695	+	oe_kk47	1.90595	0.012418	0.00865866	0.464985	4.323	O75306;A0A7I2V4X8;A0A7I2V596;A0A7I2YQG7;A0A7I2YQD8;A0A7I2V4G5;A0A7I2V630;A0A7I2V410;A0A7I2V4W5;A0A7I2V2B9;A0A7I2V3J6;A0A7I2V5E2;A0A7I2V5G4;A0A7I2V5D5;A0A7I2V517	NDUFS2
1.22243	-0.881004	0.605755	-1.46777	0.0696513	0.450941			0.299388	0.501894	0.523317	-0.0871944	-0.737221	O75312;H7C0E5;H7BZM7	ZPR1
-0.892455	-0.757915	-1.01038	0.652196	0.716436	1.29212	+	oe_kk47	2.92047	0.00120096	0.00144694	0.798125	8.2074	O75323;H7C333;F8WBI5;C9K068;C9J7B1	GBAS
-1.45898	-0.559716	-0.568348	0.846978	0.826391	0.913671	+	oe_kk47	2.34581	0.00451014	0.0033826	1.58961	5.75885	O75330;E5RIH2;E5RI30	HMMR
0.775957	1.17361	0.741177	-0.725448	-0.899891	-1.06541	+	oe_kk47	3.34149	0.000455523	0.000697872	-1.41609	-10.5566	O75340;A0A024QZ42;A0A6Q8PH81;H0Y9X3;A0A087WZ38;D6RA21;Q86W51	PDCD6
-1.2314	-1.34524	0.69886	0.637818	0.690748	0.549214			0.877201	0.132678	0.082381	2.12855	1.88393	O75348;A0A7I2V2N1;A0A7I2YQH3;A0A7I2V4K4;A0A7I2V3Q6;A0A7I2V375;F2Z307;O95670	ATP6V1G1
-0.942282	-0.763668	-0.941699	0.562962	1.31824	0.766451	+	oe_kk47	2.78607	0.00163655	0.00185714	0.583879	7.56505	O75351;K7EL71;K7EKZ3	VPS4B
0.543355	-1.64691	-0.814947	0.899533	0.507702	0.511267			0.916896	0.121089	0.0732629	0.13753	1.96335	O75367;B4DJC3;D6RCF2;A0A7I2V4D9;A0A7I2YQB9	H2AFY
-1.11854	-0.383061	-0.953077	1.48831	0.55997	0.406393	+	oe_kk47	1.80779	0.0155672	0.0103519	0.359895	4.04287	O75368	SH3BGRL
-0.758676	-1.37393	-0.481596	0.777925	0.835432	1.00084	+	oe_kk47	2.51586	0.00304888	0.00233441	2.11468	6.40684	O75380;D6RBT3	NDUFS6
1.37166	0.0230551	0.938217	-1.22734	-0.797985	-0.307603	+	oe_kk47	1.50459	0.0312903	0.0180586	-0.600691	-3.25289	O75381;K7EK59	PEX14
0.55644	-2.0235	0.217672	0.552567	0.335333	0.361486			0.439904	0.363158	0.311188	0.662064	1.02534	O75394	MRPL33
0.553999	1.07414	1.05037	-0.956352	-0.722345	-0.999816	+	oe_kk47	3.14441	0.000717117	0.00138156	-1.19746	-9.38863	O75396;A0A087X1A9	SEC22B
1.24487	0.332061	0.622802	-1.1168	0.206368	-1.2893	+	oe_kk47	1.26546	0.0542675	0.0304736	-0.140442	-2.69691	O75400;A0A7N4I394;F5H578;H0YG38;H7C2N3;F8VU11;Q6NWY9	PRPF40A
-0.100943	-1.96044	0.359943	0.609651	0.702847	0.388938			0.725873	0.187987	0.128476	1.18975	1.58572	O75431;C9JNK6;C9JAZ1;F8WE26	MTX2
1.039	0.887272	0.790797	-1.03098	-0.951468	-0.734617	+	oe_kk47	4.03333	9.26126e-05	0.000455696	-0.573165	-15.8493	O75436;S4R3Q6;S4R2Y3	VPS26A
-1.87473	-0.0169923	-0.152509	0.601577	0.893534	0.549123	+	oe_kk47	1.05413	0.0882816	0.0489758	1.22476	2.24346	O75438	NDUFB1
1.53446	0.552519	-0.318767	-0.0926291	-0.195079	-1.48051			0.779657	0.16609	0.111322	-0.141335	-1.69104	O75439;G3V0E4;F8WAZ6;F8WEA6;F8WBE1	PMPCB
-0.841111	0.27703	1.54698	-0.447531	-1.12764	0.592271			0.314473	0.48476	0.493915	-0.0867901	-0.769046	O75475	PSIP1
-1.07039	-0.899423	-0.669436	1.28241	0.551801	0.805039	+	oe_kk47	2.70982	0.00195065	0.00185608	0.805222	7.22102	O75477;B0QZ43	ERLIN1
-0.918788	-0.915771	-0.86682	0.76446	1.19823	0.73869	+	oe_kk47	3.55907	0.000276013	0.000615385	0.70031	12.0046	O75489;E9PS48;G3V194;E9PKL8	NDUFS3
-0.587682	0.772075	1.24389	-0.609906	0.540657	-1.35903			0.539665	0.288626	0.222579	-0.275471	-1.2225	Q5JRI1;O75494;Q8WXF0;Q6IQ42	SRSF10
-1.06571	-1.31997	-0.0724561	0.712783	0.665893	1.07946	+	oe_kk47	1.81825	0.0151967	0.0102483	0.497082	4.0721	O75506	HSBP1
0.491622	1.74548	-0.535705	-0.33408	-1.11854	-0.248783			0.725843	0.188	0.128429	-0.108835	-1.58566	O75531	BANF1
1.4414	0.243808	-1.59998	0.0659421	-0.454534	0.303368			0.020754	0.953336	0.970129	-0.00252724	-0.0622688	O75533;H7C341;B4DGZ4;A0A494C1M2;F8WC19	SF3B1
-0.653789	0.114312	1.4628	0.534264	0.00332231	-1.46091			0.289513	0.513437	0.543168	-0.0498867	-0.716235	O75534;E9PLT0;E9PNG3;E9PLD4;E9PKN4	CSDE1
0.729682	-1.4309	-0.827175	1.21886	0.472837	-0.163305			0.602448	0.249777	0.183338	0.227098	1.34515	O75569;A0A7I2YQ87;A0A7I2V5H3;A0A7I2V2P4;F8WEG8;G5E9Q4;A0A7I2V5C2;A0A7I2V3L6;C9JMM3;A0A7I2V593;B4DJC7;A0A7I2V2I8;A0A7I2V3J2;A0A7I2V315	PRKRA
-1.77665	-0.277705	0.756301	0.756301	0.758564	-0.216816			0.46563	0.342271	0.284495	0.171401	1.07657	O75600;H7BZ75;C9IZC9	GCAT
-1.10244	0.268592	-1.07203	0.967744	1.23935	-0.301224			0.904362	0.124634	0.0754954	0.237574	1.9382	O75607	NPM3
-0.727511	-1.08278	-0.903561	0.923482	1.01002	0.78035	+	oe_kk47	3.91265	0.000122278	0.000397059	1.94587	14.771	O75608;E5RGR0;A0A087X1K9;B4DP64;E5RJ48;E5RI35	LYPLA1
-1.91011	-0.153539	0.828946	0.705825	0.30119	0.22769			0.432332	0.369546	0.318975	0.372873	1.0102	O75616;J3QSB2;J3QRV9;K7EQJ8	ERAL1
-1.63641	-0.265188	-0.0611423	0.880395	1.20723	-0.124884			0.962471	0.109026	0.0638961	0.161588	2.05535	O75643;A0A494C1A5	SNRNP200
-1.12173	-1.34543	0.0849613	0.802463	0.917534	0.6622	+	oe_kk47	1.61432	0.0243041	0.0143382	0.592397	3.52663	O75663	TIPRL
0.99991	0.973542	0.647012	-1.35169	-0.604313	-0.66446	+	oe_kk47	2.56041	0.00275163	0.00217897	-1.32293	-6.58643	O75683	SURF6
0.148593	0.54886	1.60594	-1.23546	-0.556446	-0.511485	+	oe_kk47	1.4452	0.0358757	0.0202889	-0.389558	-3.10988	O75691	UTP20
0.678967	1.03769	0.996002	-0.967077	-0.797211	-0.948369	+	oe_kk47	3.87188	0.000134314	0.000378947	-0.247246	-14.4231	O75694;E9PF10;D6RA13	NUP155
0.128883	1.51731	0.670225	-1.05835	-0.228723	-1.02934	+	oe_kk47	1.47085	0.0338182	0.0191082	-0.262765	-3.17123	O75717;C9JYB3	WDHD1
0.676969	0.909404	1.01168	-1.23945	-0.338674	-1.01994	+	oe_kk47	2.41076	0.00388365	0.00261281	-0.300619	-5.99953	O75718;C9JP16;Q92791	CRTAP
-1.38742	-0.632732	-0.606619	0.919343	0.897752	0.809676	+	oe_kk47	2.60772	0.00246763	0.00209896	0.973525	6.78191	O75746;F8W9J0;H0YFB2;B4DGK6	SLC25A12
1.45469	-1.062	-1.20122	0.0226782	0.349276	0.436583			0.244115	0.570013	0.634658	0.162071	0.618021	O75792;A0A2R8Y606;A0A2R8Y658	RNASEH2A
-0.5174	-1.4238	-0.657317	0.987274	0.816876	0.79437	+	oe_kk47	2.4136	0.00385834	0.00262315	0.77019	6.01025	O75794;X6RA30;X6RF82;X6RKY7;H7BZW7	CDC123
-0.511856	-1.55189	-0.414884	1.05267	0.585034	0.840924	+	oe_kk47	1.88303	0.0130909	0.00918232	0.740189	4.25642	O75815	BCAR3
0.326659	0.974224	1.21633	-0.468291	-0.753924	-1.295	+	oe_kk47	2.02048	0.00953938	0.00717158	-0.870907	-4.66705	O75818;A0A087X1N3;X6RLL4;F8WC38	RPP40
1.26205	0.0732887	-1.34591	-0.592005	-0.426154	1.02873			0.00252186	0.99421	0.995157	0.00137838	0.00772006	O75821;K7EL20;K7ER90;K7ENA8;K7EP16;K7EL60;K7ENH0	EIF3G
1.36009	0.778495	0.487429	-0.823598	-0.945008	-0.85741	+	oe_kk47	2.60191	0.00250086	0.00208935	-0.870829	-6.75764	O75822;H0YLP3;H0YGJ7	EIF3J
0.739979	-1.3099	-1.26731	0.631084	0.55369	0.652452			0.839618	0.144671	0.0931054	1.73068	1.80926	O75828	CBR3
-0.218627	-1.64863	-0.466932	0.563039	0.629958	1.14119	+	oe_kk47	1.50722	0.0311014	0.0180199	0.435066	3.25931	O75843;G3V3Z2;G3V532;G3V2V9	AP1G2
0.642446	0.572619	1.02393	0.0365292	-0.580707	-1.69481	+	oe_kk47	1.32893	0.0468889	0.0265427	-0.220825	-2.83956	O75844;A0A6Q8PHG9;A0A6Q8PF67;A0A6Q8PH40	ZMPSTE24
-1.74182	0.379651	1.02126	0.0966849	0.7303	-0.486072			0.0892482	0.814239	0.877762	0.0340602	0.250919	O75874;C9J4N6;C9JLU6;C9JJE5	IDH1
-1.12016	-1.37813	0.319469	0.422037	0.984874	0.77191	+	oe_kk47	1.23356	0.0584037	0.0324167	0.698494	2.62645	O75884	RBBP9
-1.40527	-0.170988	-0.93051	0.704159	0.970481	0.832132	+	oe_kk47	1.98102	0.0104467	0.00758376	1.78811	4.54634	O75886	STAM2
1.00335	1.09133	-1.27788	-0.567503	-0.763469	0.514172			0.247271	0.565886	0.628556	-0.298404	-0.624949	O75909;G3V2Q3;G3V5E1;G3V235	CCNK
1.13143	0.627827	0.885664	-0.762626	-1.24789	-0.634412	+	oe_kk47	2.76057	0.00173552	0.0018	-0.64421	-7.4484	O75915;F8WF90;C9JQU6;F8WF33	ARL6IP5
-1.73053	0.207845	1.23859	0.174415	0.497286	-0.387602			0.0731685	0.844951	0.897844	0.0471694	0.208602	O75934	BCAS2
0.00301143	-1.34258	-1.07481	1.00439	0.845424	0.564559	+	oe_kk47	1.69472	0.0201967	0.0125059	0.565801	3.7357	O75935;X6RA56;X6RCK5;X6RLR1;A0A0A0MRV8	DCTN3
1.34317	0.51881	0.71169	-0.526781	-1.17813	-0.868756	+	oe_kk47	2.27311	0.005332	0.00384919	-0.382893	-5.49888	O75937;S4R3J5	DNAJC8
1.83573	-0.728711	-0.991148	-0.312163	0.0984137	0.0978806			0.028458	0.936574	0.959369	-0.0193462	-0.0846945	O75940;A0A6Q8PG47;A0A6Q8PFX6	SMNDC1
-1.44169	0.363144	1.43316	0.559642	-0.504919	-0.409338			0.0932044	0.806855	0.871904	-0.0263621	-0.261172	O75947;F5H608	ATP5H
0.597341	1.2733	0.535352	-0.187595	-0.76318	-1.45522	+	oe_kk47	1.67302	0.0212315	0.0130945	-0.431349	-3.67852	O75955;A0A140T9R1;A2AB10;A2AB12;A0A0G2JJQ6;A2AB13;A2AB11;A0A140T9X0;A2AB09;A0A140T9W4;A0A140T9C3;A0A140T959;A0A140T910;A0A140T957;A0A140T9B1;A0A140T974;A0A140T907;A0A140T905;A2ABJ5	FLOT1
-1.11175	-0.927183	1.04388	-0.642206	0.994561	0.642697			0.319691	0.478971	0.484408	0.0927855	0.779991	O75962;E7EWP2;E7EPJ7;F5H228;A0A1W2PRD7;A0A804HLI0;H7BXZ5;C9IZQ6;A0A804HKT9;A0A804HII1;A0A087X139;A0A804HJ49;A0A804HI91;A0A804HJC5;A0A804HIP9;A0A804HIN3;A0A804HIK8;A0A804HIY9;A0A804HJX0;O60229;A0A804HLF3	TRIO
0.464274	-0.909365	-1.59874	0.731258	0.604534	0.708043	+	oe_kk47	1.05365	0.0883792	0.0490406	1.7782	2.24247	O75976;J3QRJ9	CPD
-0.382784	1.34643	1.15055	-0.587224	-0.442426	-1.08455	+	oe_kk47	1.14236	0.072051	0.039937	-0.28735	-2.42909	O76003	GLRX3
1.33538	0.805528	0.481863	-0.705813	-0.949081	-0.967873	+	oe_kk47	2.57737	0.00264625	0.00220113	-0.527984	-6.65596	O76021;J3QSV6;I3L3U9;I3L3C4;I3L234;I3L1A3;J3KPU7;I3L2F2;I3L4T8;I3L1Y4	RSL1D1
1.30517	0.925252	-0.375141	-0.647578	-1.36249	0.15479			0.856123	0.139276	0.0880204	-0.160076	-1.84199	O76031;H0YM48;H0YK07	CLPX
-1.31941	-0.196564	-1.02351	0.921245	0.722725	0.895508	+	oe_kk47	2.11133	0.00773874	0.00558966	1.29742	4.95408	O76054;B3KRD8;C9JZI9;Q9UDX4;C9JYY7;F8WEE7;C9JTM4	SEC14L2
0.548526	1.50149	0.471873	-1.08723	-0.790848	-0.64381	+	oe_kk47	2.03875	0.0091464	0.00688615	-0.49683	-4.72372	O76071	CIAO1
0.839491	0.757146	1.08171	-1.21318	-0.674677	-0.79049	+	oe_kk47	3.14209	0.000720958	0.0013741	-0.311391	-9.3756	O76094;D6RDY6;R4GNC1	SRP72
-0.777832	-1.1515	-0.771538	1.06498	0.79043	0.845453	+	oe_kk47	3.54723	0.000283642	0.000608924	2.0673	11.9212	O94760;B4DYP1	DDAH1
-1.98994	0.235947	0.234349	0.246091	0.807127	0.466422			0.59673	0.253087	0.186889	0.832859	1.33401	O94763;I3L2V7;I3L104;I3NI51	URI1
0.377768	-1.12958	-1.36005	0.354183	0.703576	1.0541	+	oe_kk47	1.13924	0.0725705	0.0402407	0.321421	2.42246	O94776	MTA2
0.909388	0.903401	0.920822	-1.00774	-0.817597	-0.908273	+	oe_kk47	5.301	5.00035e-06	0	-5.56063	-33.0466	O94808;E5RJP4	GFPT2
1.30254	-1.42991	0.703961	-0.78928	0.34883	-0.136138			0.161872	0.688855	0.776959	-0.0868041	-0.430736	O94822;H7BYG8;S4R3T2	LTN1
0.889044	0.649279	1.08605	-1.32499	-0.715762	-0.583623	+	oe_kk47	2.58943	0.00257377	0.00222121	-0.418336	-6.70575	O94826	TOMM70A
-0.721515	-0.136612	0.00192976	1.3032	0.930303	-1.3773			0.262552	0.546321	0.599499	0.165584	0.658276	O94842;A0A669KB71;O15405;Q96NM4;O94900	TOX4
1.23129	0.548333	0.835901	-1.2153	-0.816862	-0.583358	+	oe_kk47	2.52508	0.00298483	0.00221018	-1.86093	-6.44365	O94855;E9PDM8;E9PC44	SEC24D
0.185858	0.0304723	1.73672	0.0181645	-0.934774	-1.03644			0.952253	0.111621	0.0658586	-0.274417	-2.03465	O94874	UFL1
0.745779	-1.64863	1.16595	-0.334222	0.390651	-0.31953			0.0673554	0.856337	0.905695	-0.022452	-0.193035	O94888;C9JAT7;F8WB69;C9JD50;H7BYF4	UBXN7
0.90512	-1.54319	-0.919393	0.323718	0.406904	0.826843			0.621768	0.238909	0.173233	0.733754	1.3828	O94903;E5RFX7;E5RG77;H0YBG2;E5RFZ4	PROSC
-0.491515	-0.57992	-1.32938	0.33066	0.586333	1.48382	+	oe_kk47	1.65989	0.0218832	0.0134268	0.338172	3.64421	O94905;E5RHW4;E5RJ09	ERLIN2
-0.940685	-0.82773	-0.932343	0.748375	0.758539	1.19384	+	oe_kk47	3.54474	0.000285273	0.000605744	0.38451	11.9037	O94906	PRPF6
-1.01639	-0.131868	-1.36047	0.840185	0.853825	0.814716	+	oe_kk47	1.98827	0.0102738	0.00760622	0.946491	4.56832	O94916;J3KRL6	NFAT5
-0.867486	-0.846554	-1.00821	0.898432	1.06023	0.763587	+	oe_kk47	4.27202	5.3454e-05	0.000624277	1.34862	18.2126	O94925;H7BZD1	GLS
1.31458	0.498467	0.799908	-0.855927	-1.11023	-0.646796	+	oe_kk47	2.50727	0.00310978	0.00244039	-0.325993	-6.37267	O94973;A0A0G2JS82;E9PR62;A0A0G2JRF9;A0A0G2JQA4;E9PNC4;A0A0G2JRS3;M0R2D9	AP2A2
1.47974	0.750161	0.112581	-0.901495	-1.15869	-0.282304	+	oe_kk47	1.52476	0.0298703	0.0174065	-0.846356	-3.30226	O94992	HEXIM1
1.82611	-0.215991	-0.32704	-1.1442	-0.379983	0.241099			0.457613	0.348648	0.292908	-0.185514	-1.06064	O95071;E7EMW7;E5RFK7;H0YBB4;E7ET84	UBR5
-1.52094	-0.175112	1.60825	-0.18044	0.110951	0.157285			0.0213955	0.951929	0.96968	0.011481	0.0641499	O95084	PRSS23
-1.4488	-0.703124	-0.374692	0.96328	1.02278	0.540554	+	oe_kk47	2.05767	0.00875649	0.00639626	1.58021	4.78298	O95104	SCAF4
-1.29048	-0.575931	-0.612746	0.880252	0.263534	1.33537	+	oe_kk47	1.88478	0.0130383	0.00912188	1.09021	4.26147	O95139;A0A087WZX2	NDUFB6
0.258008	-0.98846	-1.12103	0.159064	1.63432	0.0580934			0.852615	0.140406	0.0889449	0.267206	1.83503	O95155;K7EP75;B1AQ61	UBE4B
-2.01015	0.110106	0.453632	0.360949	0.647572	0.437893			0.550629	0.28143	0.214749	0.799069	1.24397	O95159;E9PQA5;E9PQ47;E9PNY1;E9PJX1;E9PJ47;E9PMQ3	ZFPL1
0.391197	-1.72377	-0.697825	0.632956	0.622646	0.774794			1.03779	0.0916664	0.0513659	1.90957	2.2096	O95168;F2Z3P9;C9JXQ9	NDUFB4
-0.659779	-1.0991	-0.912213	0.586531	0.979728	1.10483	+	oe_kk47	3.04367	0.000904336	0.00143894	0.835372	8.83916	O95169;E9PQ68;K9J7I2;E9PIZ8	NDUFB8
-1.01897	-0.822918	-0.891011	0.902575	0.89371	0.936614	+	oe_kk47	5.18544	6.52469e-06	0	4.65354	30.9131	O95171;F2Z2X8	SCEL
0.425623	-0.588606	-1.78605	0.66895	0.72839	0.551694			0.94806	0.112704	0.0668786	0.774399	2.02616	O95197;F5H617;F5H891;F5GWG7	RTN3
1.19377	0.417812	1.00019	-1.14679	-0.65587	-0.809115	+	oe_kk47	2.49923	0.00316789	0.00242217	-0.541203	-6.34086	O95202	LETM1
0.213016	-0.628716	-1.72724	0.774868	0.825021	0.543051	+	oe_kk47	1.18164	0.0658203	0.03627	1.03007	2.51337	O95208;F6PQP6;E9PBC1;I3L2B2;I3L356;I3L2H1;J3KSF8;J3KTF6;J3KSA6;J3KSC7;J3QLN2	EPN2
0.794042	1.30557	0.52284	-0.721765	-0.770907	-1.12978	+	oe_kk47	2.575	0.00266073	0.00219369	-0.682779	-6.64619	O95218	ZRANB2
-1.62596	-0.419202	-0.37113	1.02534	0.585754	0.805202	+	oe_kk47	1.69978	0.0199627	0.0124141	1.59421	3.7491	O95219;F8W9T3	SNX4
-1.10842	-1.00177	-0.537774	0.676507	1.18281	0.78864	+	oe_kk47	2.78904	0.0016254	0.0018596	1.75452	7.57878	O95235;D6RBN1;D6R9E4	KIF20A
-0.31656	-1.06772	-1.22078	0.802354	0.881014	0.921689	+	oe_kk47	2.45476	0.00350946	0.00262423	0.871074	6.16731	O95239;Q2VIQ3	KIF4A
0.385733	-1.19423	-1.33924	0.955026	0.532797	0.659921	+	oe_kk47	1.1884	0.0648037	0.0354387	0.458534	2.52798	O95292;E5RK64	VAPB
-1.65051	0.474083	0.429163	1.16519	0.250319	-0.668251			0.221222	0.600867	0.679623	0.07945	0.567247	O95302;C9J4P8	FKBP9
1.52709	-0.204368	0.704757	-1.11493	-0.941084	0.0285353			1.03439	0.0923868	0.0516712	-0.25404	-2.20258	O95336;M0R261;M0R1L2;M0R0U3	PGLS
1.23448	0.720885	0.710353	-1.08493	-0.67798	-0.90281	+	oe_kk47	2.97743	0.00105334	0.00136677	-3.58088	-8.49414	O95340	PAPSS2
0.0246824	0.854927	1.50081	-0.562164	-0.755795	-1.06246	+	oe_kk47	1.61009	0.024542	0.0144381	-0.230323	-3.51583	O95347;A0A0C4DGE5;Q5T821	SMC2
-1.64062	-0.735675	0.336236	0.971204	0.270219	0.79864	+	oe_kk47	1.04917	0.0892956	0.0497411	0.724029	2.23317	O95352;H7C059;H7C369;H7C2R3;H7BZ92;H7C2J8;C9JFF4	ATG7
1.10984	0.844211	0.702838	-0.525951	-1.15065	-0.98029	+	oe_kk47	2.87861	0.00132248	0.00156223	-0.363548	-8.00226	O95372;Q5QPQ1;Q5QPQ0;Q5QPQ3;Q5QPQ2;Q5QPN9;Q5QPN5	LYPLA2
-0.141649	1.0152	1.44643	-0.841977	-0.571666	-0.90633	+	oe_kk47	1.478	0.033266	0.0188061	-0.297094	-3.18844	O95373;E9PLJ0;E9PLB2	IPO7
-0.502442	-1.1312	-0.578389	0.638148	1.64938	-0.0754939	+	oe_kk47	1.28481	0.0519027	0.0293969	0.254733	2.74006	O95376;C9JZ71	ARIH2
0.890065	-0.665676	-1.63283	0.575066	-0.0418668	0.875247			0.527863	0.296577	0.231089	0.0807343	1.19935	O95400	CD2BP2
0.0679914	-1.33889	0.0919056	-0.200481	-0.359698	1.73917			0.404358	0.394132	0.35292	0.0639432	0.953943	O95433;G3V438;H0YJG7;H0YJU2;G3V3W9;H0YJ63	AHSA1
-0.618223	1.28625	1.03873	-0.531827	0.0875655	-1.2625			0.730019	0.186201	0.126601	-0.281141	-1.59382	O95456;F8WBH7	PSMG1
-0.579074	-1.35438	-0.676668	0.619359	1.05573	0.93503	+	oe_kk47	2.48806	0.00325042	0.00249894	1.0879	6.29688	O95470;H0Y3V8;H7BXL7	SGPL1
0.548542	-0.74935	-1.41622	1.45199	0.0117872	0.153248			0.66305	0.217245	0.153679	0.14243	1.4632	O95478;A0A0A0MQZ6;H0YAI9	NSA2
0.213601	-1.60614	0.348309	0.220294	-0.553794	1.37773			0.341255	0.455769	0.449042	0.104947	0.824921	O95486;H0Y9J6	SEC24A
-0.672236	0.695887	-1.66574	0.0540759	0.681497	0.90652			0.68115	0.208377	0.145867	0.289056	1.49847	O95487	SEC24B
-0.824561	0.0816732	0.684224	0.553887	1.05926	-1.55449			0.0141812	0.967874	0.979754	0.0105832	0.0428512	Q5R3B4;O95563	MPC2
0.379691	0.0485387	1.26613	0.427183	-0.421461	-1.70008			0.720395	0.190373	0.13038	-0.170439	-1.57502	O95571;M0QXB5;M0QY80;M0QX80	ETHE1
-1.27476	-0.918155	0.75081	-0.301165	1.29475	0.448522			0.54801	0.283133	0.216258	0.248022	1.23884	O95602;B9ZVN9	POLR1A
1.80045	-0.634279	0.136977	0.202372	-1.03829	-0.467236			0.468384	0.340107	0.282143	-0.167288	-1.08204	O95639;C9JEV9;B7Z7B0;H7C419;C9K0K2;H7C016;F8WEL7	CPSF4
-1.99477	0.127027	0.240131	0.505256	0.737196	0.385161			0.670639	0.213482	0.150421	0.319141	1.47799	O95671	ASMTL
-0.831161	-1.00391	-0.894471	0.830806	0.884524	1.01421	+	oe_kk47	4.7844	1.64286e-05	0	2.62249	24.5153	O95674	CDS2
-0.96863	-1.11897	-0.590954	1.10471	0.758975	0.814866	+	oe_kk47	3.14499	0.00071616	0.00138657	1.91501	9.39188	O95716;M0R257	RAB3D
-0.418166	0.0485582	-1.79855	0.8396	0.680422	0.64814	+	oe_kk47	1.21778	0.0605648	0.0332743	0.964791	2.59187	O95721;C9JAF7	SNAP29
0.980207	0.743189	0.904797	-0.678007	-1.36682	-0.583367	+	oe_kk47	2.61876	0.00240569	0.00212093	-0.454819	-6.82822	O95747;C9JIG9	OXSR1
0.324341	1.17651	1.08789	-0.635252	-0.888597	-1.06489	+	oe_kk47	2.3555	0.00441062	0.00330943	-0.688353	-5.79422	O95757;E9PDE8;D6RJ96	HSPA4L
-0.872766	0.374559	1.68298	-0.977735	-0.483095	0.276054			0.407207	0.391555	0.349265	-0.114902	-0.959695	O95758;X6R242	PTBP3
-1.66567	-0.237683	1.18505	0.401265	0.684551	-0.367515			0.210707	0.615592	0.69836	0.132356	0.543604	O95777;F2Z2Y6;C9JIZ0;C9JNV3	LSM8
-1.30322	0.615688	1.61452	-0.41704	-0.332187	-0.177761			0.29102	0.511658	0.540331	-0.116563	-0.719445	O95782	AP2A1
-1.08749	-1.15445	-0.394978	0.943377	0.798786	0.894754	+	oe_kk47	2.68978	0.00204277	0.00208845	5.08416	7.13288	O95793;Q5JW30;F6UDC6	STAU1
-0.246336	-0.21157	1.85835	-1.11115	0.142216	-0.431519			0.523161	0.299805	0.234268	-0.160889	-1.19012	O95801	TTC4
-0.187351	1.7373	0.365202	-0.899759	-1.00179	-0.0136013			0.913547	0.122026	0.0739381	-0.0977879	-1.95662	O95816	BAG2
1.06848	1.07623	0.513583	-1.01468	-0.989174	-0.654429	+	oe_kk47	2.89352	0.00127785	0.00159416	-2.49326	-8.07478	O95817;C9JFK9	BAG3
1.31006	0.229723	0.995279	-0.923317	-1.01682	-0.594931	+	oe_kk47	2.09254	0.0080809	0.00615139	-0.237709	-4.89363	O95861;A6NF51;F8W1J0;F8VZG4;F8VVW8;F8VRY7	BPNT1
0.0933417	-1.16184	-1.2969	1.03086	0.6111	0.723429	+	oe_kk47	1.57523	0.0265932	0.0153907	2.30263	3.42765	O95865;A0A140T971;Q5SSV3;Q5SRR8;H0Y7N1	DDAH2
-0.805929	-0.796996	-1.11532	0.959633	0.834173	0.924441	+	oe_kk47	4.08226	8.27447e-05	0.0005	0.719253	16.308	O95881;V9GY50;V9GYV4	TXNDC12
0.455262	-1.73315	-0.677034	0.728085	0.768138	0.4587			0.954219	0.111117	0.0655849	1.22864	2.03862	O95905;C9J316;C9JGV1;F2Z2R1	ECD
-1.96838	0.436707	-0.104174	0.624517	0.399658	0.611677			0.676601	0.210571	0.147843	0.592607	1.4896	O95983;K7EIE8;A0A0A0MTS6;A0A087WT34;A0A087X1H1	MBD3
-0.603526	-1.07291	-1.02431	0.950087	0.862048	0.888608	+	oe_kk47	3.54439	0.000285503	0.000604167	1.04631	11.9012	O96000;H3BV16;H3BPJ9	NDUFB10
-0.0897714	-1.26991	-1.08936	0.480637	0.874073	1.09433	+	oe_kk47	1.79103	0.0161797	0.0104856	0.489253	3.99632	O96005;K7EQQ1;K7EJ16	CLPTM1
-0.73577	-0.448695	-1.08524	-0.186676	1.34611	1.11027	+	oe_kk47	1.38232	0.0414648	0.0238129	0.324936	2.96218	O96008;K7EJ57;K7EKG4	TOMM40
-0.921875	-0.595804	-1.08129	1.34194	0.496012	0.761022	+	oe_kk47	2.41638	0.00383372	0.00263095	1.25953	6.02073	O96013;M0R1R1;M0R0L9;M0R3G6;M0R2X4;Q9P286	PAK4
-0.79448	-1.20002	-0.650799	0.93281	0.565765	1.14673	+	oe_kk47	2.76406	0.00172163	0.00180695	0.354297	7.46431	O96019;H7C5S0;C9JQT2;O94805	ACTL6A
0.838537	1.04147	0.831473	-1.10902	-0.74219	-0.860271	+	oe_kk47	3.83352	0.000146717	0.000366102	-0.772573	-14.103	P00167;J3KNC7	CYB5A
-0.96331	0.0115393	0.0400792	1.75109	0.151134	-0.990529			0.284755	0.519093	0.55273	0.0350952	0.706079	P00338;F5GXY2;F5GYU2;F5GXH2;F5H5J4;F5H6W8;F5GWW2;F5GXC7;F5H8H6;F5GXU1;P07864;Q6ZMR3;F5H5G7;F5H155;A0A087WUM2;G3XAP5;F5H245	LDHA
1.61909	0.463183	0.342922	-1.0476	-0.683498	-0.694098	+	oe_kk47	1.72362	0.0188964	0.0118616	-0.341867	-3.81269	P00367;A0A804HJD7;A0A804HKE0;P49448;A0A804HJZ0;A0A804HHS2;A0A804HHU3;A0A804HLC0;A0A804HIA0	GLUD1;GLUD2
-0.218102	0.0319661	0.986222	0.453131	-1.84894	0.595719			0.240905	0.574242	0.641152	-0.065663	-0.610955	P00374;B4DM58;C9JJ68;Q86XF0	DHFR
-1.52948	-0.350546	-0.631921	0.744514	0.778134	0.989294	+	oe_kk47	2.00033	0.0099924	0.00742772	0.395994	4.60511	P00387;B1AHF3	CYB5R3
1.1414	-1.06063	-1.07151	0.332294	-0.41137	1.06981			0.317831	0.481026	0.487959	0.0612507	0.776094	P00390;A0A2R8YF59;H0YC68	GSR
-1.3206	-0.844378	-0.432925	0.725911	1.13157	0.74042	+	oe_kk47	2.40982	0.00389206	0.00260767	0.834215	5.99597	P00403	MT-CO2
-1.77917	0.561968	0.5534	-0.150073	-0.248343	1.06222			0.191424	0.643541	0.727978	0.0457122	0.499672	P00441;H7BYH4	SOD1
1.04392	1.03439	0.620196	-1.02418	-0.88719	-0.787133	+	oe_kk47	3.49461	0.000320177	0.000564477	-0.653877	-11.557	P00491;G3V5M2;G3V2H3;G3V393	PNP
-0.219201	1.13981	1.36749	-0.614281	-0.789005	-0.884811	+	oe_kk47	1.41604	0.0383672	0.0217262	-0.327856	-3.04094	P00492	HPRT1
1.64288	0.450376	0.219311	-1.18629	-0.498022	-0.628254	+	oe_kk47	1.46318	0.0344207	0.0193562	-0.16824	-3.15282	P00505	GOT2
-0.888472	-0.84352	-0.997631	0.822313	0.887658	1.01965	+	oe_kk47	4.7919	1.61473e-05	0	2.05147	24.622	P00533;E9PFD7;Q504U8;C9JYS6	EGFR
0.945011	0.828906	0.958272	-0.840778	-1.00028	-0.891131	+	oe_kk47	5.08378	8.24556e-06	0	-0.76709	-29.1496	P00558	PGK1
0.591806	1.22271	0.867374	-0.939686	-0.841537	-0.90067	+	oe_kk47	3.19451	0.000638984	0.00100567	-1.83488	-9.6735	Q5T9B7;P00568;H0YID2;Q9Y6K8	AK1
0.777702	0.959603	0.993668	-0.889471	-0.909719	-0.931783	+	oe_kk47	4.93317	1.16635e-05	0	-3.07275	-26.719	P00966;Q5T6L6;Q5T6L5	ASS1
-1.504	0.702759	1.42957	-0.346714	0.00163238	-0.283244			0.179214	0.66189	0.748454	-0.163229	-0.47144	P01024;M0QYC8	C3
-0.363379	-1.37006	-0.858322	0.780721	0.954113	0.856926	+	oe_kk47	2.37304	0.00423604	0.00303448	2.2877	5.85874	Q5H9A7;P01033;H0Y789;Q5H9B5	TIMP1
-1.57822	0.0265304	-0.783529	0.686907	1.00347	0.644843	+	oe_kk47	1.50937	0.0309478	0.0178824	0.58704	3.26455	P01112;A0A804HJ06	HRAS
-0.982889	-0.749967	-0.942324	1.24218	0.799408	0.63359	+	oe_kk47	3.0977	0.000798546	0.00150865	2.37368	9.13007	P01116	KRAS
-0.833223	-0.637264	-1.18248	0.651855	1.19321	0.807908	+	oe_kk47	2.83813	0.00145168	0.00193388	0.795555	7.80828	P02751;H0Y7Z1;H0Y4K8	FN1
-1.63998	-0.242794	-0.514364	1.01717	0.680768	0.699194	+	oe_kk47	1.65068	0.0223522	0.0136923	0.177003	3.62026	P02786;G3V0E5;H7C3V5;F8WBE5	TFRC
-0.547002	-0.991618	-1.13863	0.774962	1.02556	0.876734	+	oe_kk47	3.12646	0.000747377	0.00135702	1.36677	9.28848	P02795;P13640;H3BSP9;H3BSF1;P80294;P04731	MT2A;MT1G
1.24874	0.239814	1.06459	-0.809211	-0.679182	-1.06475	+	oe_kk47	2.17233	0.00672466	0.00506129	-0.585786	-5.15424	P03928	MT-ATP8
0.935534	0.882691	0.91922	-0.951174	-0.876482	-0.909789	+	oe_kk47	6.56402	2.72885e-07	0	-1.77433	-68.4523	P04040	CAT
1.40417	0.737617	0.311911	-1.23207	-0.858538	-0.363092	+	oe_kk47	1.80488	0.0156718	0.010409	-0.21206	-4.03476	P04075;H3BQN4;J3KPS3;H3BUH7;H3BR04;H3BMQ8;H3BU78;H3BR68	ALDOA
1.37652	0.804888	0.142409	-0.961002	-1.2222	-0.140611	+	oe_kk47	1.4858	0.0326738	0.0185363	-0.516472	-3.20726	P04080;A0A1W2PS52;A0A1W2PQG6	CSTB
0.790438	0.951697	0.990226	-0.902239	-0.925635	-0.904487	+	oe_kk47	5.10733	7.81034e-06	0	-2.8068	-29.549	P04083;Q5T3N1;Q5T3N0	ANXA1
-0.562626	-0.549446	-1.46536	0.974286	0.803865	0.799281	+	oe_kk47	2.29295	0.0050939	0.00389111	2.61044	5.56886	P04179;F5H4R2;F5GYZ5;F5H3C5;G8JLJ2;G5E9P6;F5GXZ9	SOD2
-0.43476	0.565533	1.7741	-0.377285	-0.632203	-0.895382			0.903378	0.124917	0.0756865	-0.257449	-1.93623	P04181	OAT
-0.948685	-1.02797	-0.739191	1.03544	0.760009	0.920392	+	oe_kk47	3.98548	0.0001034	0.000425197	1.54658	15.4129	P04183;K7ERV3;K7ES52;K7ERJ1;K7ENW5	TK1
0.442156	1.0831	1.11075	-0.668617	-0.896305	-1.07108	+	oe_kk47	2.68207	0.00207936	0.00207065	-0.442432	-7.09924	P04406;E7EUT5;O14556	GAPDH
-0.698128	-0.768875	-1.1225	0.331338	1.16084	1.09733	+	oe_kk47	2.3599	0.00436616	0.00323179	1.27501	5.81034	P04424;A0A5F9ZHM8;F8W943;A0A5F9ZHC6;H7C0S8;A0A5F9ZI35	ASL
-0.687867	-0.934747	-1.0331	1.04969	1.11468	0.491339	+	oe_kk47	2.86629	0.00136054	0.00167797	0.337364	7.94277	P04792;A0A6Q8PFK8;A0A6Q8PHJ6;A0A6Q8PGK1;A0A6Q8PFE7;A0A6Q8PF43;A0A6Q8PHA6;A0A6Q8PH65;A0A6Q8PGY2;C9J3N8	HSPB1
-0.971803	-0.889748	-0.873844	0.895711	0.865857	0.973827	+	oe_kk47	5.68391	2.07057e-06	0	2.20099	41.2184	P04818	TYMS
-1.43233	-0.515678	-0.374677	0.74718	1.39715	0.178349	+	oe_kk47	1.48349	0.0328481	0.0186914	0.265557	3.20169	P04843;B7Z4L4;F8WF32	RPN1
-1.48698	-0.807123	-0.191405	0.67202	0.955848	0.857641	+	oe_kk47	1.90596	0.0124177	0.00866478	0.738733	4.32304	P04844;Q5JYR7;Q5JYR4;F2Z3K5;Q5JYR3	RPN2
-1.03669	-0.447897	-1.14764	0.691476	1.12232	0.818431	+	oe_kk47	2.65089	0.00223414	0.00201661	0.710806	6.96462	P04899;P09471;A0A3B3IUA8;A0A1W2PRJ7;A0A1W2PP38;H3BTM2;A0A1W2PS82;F8WE78;A0A087WZE5;A0A3B3IRK0;A0A6Q8PGR1;Q5JWD1;A0A3B3ITG4;A2A2R6;A0A1W2PQK2;A0A3B3ITX3;A0A1W2PRE1;A0A3B3IS42;A0A3B3IU77;P11488;P19087;A8MTJ3;A0A087WTB6	GNAI2
-0.7894	-0.917026	-1.00107	1.08	0.960385	0.667114	+	oe_kk47	3.7146	0.00019293	0.000711656	0.691566	13.1538	P05023;M0R116;B1AKY9;A0A2R8YEY8;A0A0A0MT26;P13637;P50993;H0Y7C1;Q13733;Q5TC01;P20648;Q5TC02;E9PRA5;A0A669K9X0;M0QXF2;Q5TC05	ATP1A1
0.0348462	-0.483464	-1.76701	0.75878	0.782209	0.674636	+	oe_kk47	1.29055	0.0512212	0.0289012	2.13109	2.75291	P05026;V9GYR2	ATP1B1
1.03306	0.864846	0.688156	-0.69986	-1.41351	-0.472696	+	oe_kk47	2.34031	0.00456762	0.00348881	-2.31721	-5.73882	P05091;S4R3S4;F8VP50;P00352	ALDH2
-1.25587	-0.768352	-0.629936	0.949648	1.05362	0.650886	+	oe_kk47	2.85021	0.00141186	0.00180501	0.738671	7.86571	P05141;Q9H0C2	SLC25A5
0.710439	1.14059	0.853662	-0.836497	-0.83216	-1.03604	+	oe_kk47	3.63986	0.000229161	0.000653521	-4.51804	-12.5889	P05161;A0A096LNZ9;A0A096LPJ4	ISG15
0.803136	0.994967	0.899239	-1.12373	-0.953363	-0.620246	+	oe_kk47	3.46987	0.000338946	0.000549763	-2.72509	-11.3896	P05187;P10696;P09923	ALPP;ALPPL2
0.725487	0.799407	1.1643	-0.869607	-1.09333	-0.726257	+	oe_kk47	3.31375	0.000485568	0.000681913	-0.185036	-10.3844	P05198;G3V4T5;H0YJS4	EIF2S1
1.20625	0.595358	0.533122	-0.298457	-1.62805	-0.408225	+	oe_kk47	1.50836	0.0310199	0.0179157	-0.351948	-3.26208	P05204	HMGN2
-0.794135	-1.03618	-0.898797	0.93266	0.944877	0.85158	+	oe_kk47	4.74437	1.80148e-05	0	1.93604	23.9538	P05362;K7EKL8;E7ESS4	ICAM1
0.466031	-1.07801	0.862315	-0.0229142	-1.3076	1.08018			0.0638546	0.863268	0.909552	-0.0261974	-0.183588	P05386	RPLP1
1.46962	1.02041	-0.771428	-0.273024	-0.928295	-0.517289			0.739337	0.182248	0.12405	-0.140773	-1.61203	P05387;H0YDD8	RPLP2
-0.0124876	0.682694	1.2047	-1.7527	-0.100161	-0.0220534			0.87448	0.133512	0.0831728	-0.120626	-1.8785	P05388;F8VWS0;F8VU65;F8VPE8;G3V210;F8VW21;F8VQY6;F8VRK7;Q8NHW5;F8VZS0;F8VWV4;F8VS58;F8W1K8	RPLP0;RPLP0P6
-1.66965	0.444178	1.30124	-0.0133588	0.368542	-0.430951			0.0184031	0.958511	0.973863	-0.0084273	-0.0553546	P05455;E7ERC4;E9PGX9;E9PFL9	SSB
0.980494	0.843233	0.910149	-0.978819	-0.900066	-0.854993	+	oe_kk47	5.34843	4.48301e-06	0	-1.99332	-33.964	P05783;F8VZY9;CON__Q148H6;CON__H-INV:HIT000015463;C4AM86;Q92764;CON__Q92764;CON__Q497I4;CON__Q2M2I5;CON__Q7Z3Y7;CON__REFSEQ:XP_986630;CON__O76014;CON__O76013;CON__O76015;CON__A2AB72;CON__P02535-1;CON__Q14525;CON__Q14532;CON__Q9UE12;CON__A2A5Y0;CON__Q15323;O76015;Q7Z3Y7;O76014;O76013;Q15323;Q14525;Q2M2I5;Q14532	KRT18
-1.7563	-0.108929	-0.335097	0.656746	0.481428	1.06215	+	oe_kk47	1.26637	0.0541539	0.0305328	0.211997	2.69894	P06132;A0A494C085;A0A1B0GVZ4;A0A494C0Q8;A0A1B0GVN9;A0A494BZY8;H0Y5R6;A0A494C0S8;Q5T446;A0A494C007;A0A494C1D8;A0A494C0P4;A0A494C1T3	UROD
0.100223	-0.794731	-1.53681	0.538197	1.21641	0.476707	+	oe_kk47	1.31613	0.0482914	0.027266	0.0932986	2.81052	P06576;H0YH81;F8W079;H0YI37	ATP5B
0.917318	0.595937	0.925813	-1.58975	-0.253966	-0.595347	+	oe_kk47	1.76218	0.017291	0.0109582	-1.56911	-3.91702	P06703;R4GN98	S100A6
1.00288	1.0264	0.597779	-1.29529	-0.568934	-0.762836	+	oe_kk47	2.60997	0.00245488	0.00210624	-0.708076	-6.7913	P06730;D6RBW1;H0Y8J7;D6RFJ3;D6RHE2;H0Y8X3;A6NMX2	EIF4E
1.13913	0.852586	0.0694553	0.285872	-1.43298	-0.914063	+	oe_kk47	1.0746	0.084217	0.0471592	-0.144866	-2.28611	P06733;A0A2R8Y6G6;K7EM90;A0A2R8Y879;K7ERS8;A0A2R8Y798;A0A2R8YEG5;A0A2R8Y6I8	ENO1
-0.885011	-0.912789	-0.93984	0.925834	0.87602	0.935785	+	oe_kk47	6.72239	1.895e-07	0	1.31824	74.9904	P06737;E9PK47	PYGL
-0.902344	-0.641233	-1.15648	0.845115	0.96305	0.891891	+	oe_kk47	3.5288	0.000295937	0.000591837	1.3012	11.7924	P06756;H7BZG1	ITGAV
-0.0774388	-1.31322	-0.953039	1.36868	0.408262	0.566757	+	oe_kk47	1.52736	0.029692	0.0173341	0.228737	3.30864	P07099;B1AQP8	EPHX1
0.398498	-0.22542	-1.31098	0.481517	-0.817325	1.47371			0.384459	0.412611	0.379326	0.0780118	0.913606	P07108;A0A0A0MTI5;B8ZWD1	DBI
0.257593	0.15613	-1.95199	0.966494	0.31269	0.259081			0.60895	0.246065	0.179895	0.640338	1.35783	P07199	CENPB
0.509538	1.06155	1.10225	-0.907779	-0.793777	-0.971787	+	oe_kk47	3.07302	0.00084524	0.00148048	-1.76575	-8.99608	P07203;A0A2R8Y6B6;A0A7I2YMD7;A0A7I2UQ36	GPX1
0.79716	0.951948	0.977725	-0.807652	-1.02461	-0.894567	+	oe_kk47	4.5573	2.77141e-05	0.0009	-3.08032	-21.4933	P07305	H1F0
0.111942	0.103086	-1.98026	0.693231	0.547067	0.524936			0.777172	0.167043	0.112062	1.04601	1.68616	P07311;G3V2U7;G3V3F8;G3V597	ACYP1
-0.800928	-0.876569	0.996512	1.29143	0.304274	-0.914724			0.197434	0.634696	0.719066	0.0285505	0.513448	P07355;H0YMW4;H0YN42;H0YMU9;H0YMD0;H0YM50;A6NMY6;H0YL33;H0YNB8;H0YKS4;H0YNP5;H0YN28;A0A7I2V4P4;H0YMM1;H0YNA0;H0YKL9;H0YLE2	ANXA2;ANXA2P2
-0.421837	-1.06472	-1.11415	1.18781	0.568541	0.844359	+	oe_kk47	2.42719	0.00373947	0.00257143	0.395504	6.06174	P07384;E9PRM1;E9PLX0;E9PJJ3;E9PLC9;E9PMC6;E9PJA6;E9PSA6;E9PL37;E9PQB3;E9PIA9	CAPN1
-1.29799	-0.685342	-0.608341	0.475364	1.12916	0.987148	+	oe_kk47	2.37255	0.00424082	0.00302868	0.454171	5.85693	Q5JP53;P07437;Q5ST81;A6NNZ2	TUBB
0.773122	0.817015	1.11338	-0.977691	-1.02107	-0.704759	+	oe_kk47	3.61038	0.000245256	0.000644444	-1.21003	-12.3727	P07602;C9JIZ6;Q5BJH1;A0A0J9YXB8	PSAP
0.744445	1.25645	0.650009	-1.13125	-0.831266	-0.688386	+	oe_kk47	2.81758	0.00152202	0.00190502	-0.533271	-7.71144	P07686;Q5URX0;H0YA83;H0Y9B6;D6REQ8	HEXB
-1.05814	-0.910998	-0.751519	1.01689	0.861421	0.842338	+	oe_kk47	4.19128	6.43754e-05	0.00055102	1.0395	17.3771	P07737;K7EJ44;CON__P02584;I3L3D5	PFN1
1.02694	1.23106	0.34431	-1.01526	-0.896503	-0.690546	+	oe_kk47	2.43724	0.00365393	0.00257921	-0.748989	-6.10003	P07741;H3BQZ9;H3BQB1;H3BQF1;H3BSW3	APRT
0.923983	0.851645	0.938296	-1.13176	-0.854547	-0.727617	+	oe_kk47	3.91527	0.000121543	0.000398524	-0.583445	-14.7937	P07814;V9GYZ6;V9GZ76	EPRS
1.05081	1.08493	0.349883	-0.343731	-0.767356	-1.37453	+	oe_kk47	1.90633	0.0124071	0.00867091	-0.25588	-4.32411	P07900;G3V2J8;Q14568;Q58FG0	HSP90AA1
-2.03575	0.367796	0.419098	0.291328	0.451333	0.506196			0.439629	0.363388	0.311543	0.62475	1.02479	P07902;G3V3U5;G3V223;F2Z2X9;G3V4G9;H0YJL3	GALT
1.49771	0.317099	0.411172	-0.21866	-0.542794	-1.46452	+	oe_kk47	1.30733	0.0492799	0.027976	-0.422047	-2.79064	P07919;A0A096LP55	UQCRH;UQCRHL
0.347597	1.12849	1.1409	-0.901172	-0.758101	-0.957712	+	oe_kk47	2.53538	0.00291487	0.00223439	-0.528931	-6.485	P07954;A0A804HI24;A0A804HKE6	FH
1.45406	0.269812	0.762337	-1.00855	-0.986681	-0.490972	+	oe_kk47	1.90831	0.0123507	0.0086832	-0.718875	-4.32991	P08047;H3BUU5	SP1
-0.953228	-0.931457	-0.84861	0.998016	0.899059	0.83622	+	oe_kk47	5.24772	5.65301e-06	0	1.39975	32.0452	P08133;E7EMC6;E5RK63;E5RI05;E5RJF5;E5RFF0;E5RJR0;E5RIU8	ANXA6
-0.206442	-0.62692	-0.0817112	1.98931	-0.645137	-0.429098			0.286135	0.517446	0.549738	0.087382	0.709027	P08134;Q5JR08;E9PQH6	RHOC
0.510016	0.99613	1.16448	-0.81507	-0.981161	-0.874398	+	oe_kk47	3.03777	0.000916706	0.00143421	-0.733926	-8.80791	P08237;A0A2R8Y891;F8VZI0;F8VZQ1;F8VX13;F8VP00;F8VSF7;F8VW30;F8VTQ3;F8VUB8;F8VYK8;H0YHB8;F8VVE3;F8VZ53;F8VSF5	PFKM
-0.80752	-0.628356	-1.2433	0.794859	0.933203	0.951114	+	oe_kk47	3.15401	0.000701439	0.00140441	0.261717	9.4426	P08238;Q58FF7	HSP90AB1
-0.354804	0.975819	1.46141	-0.33595	-1.14547	-0.601007	+	oe_kk47	1.10106	0.0792392	0.044129	-0.298852	-2.34161	P08240	SRPR
-1.33352	-0.574129	-0.732477	1.02626	0.812631	0.801244	+	oe_kk47	2.7175	0.00191646	0.00187	1.01745	7.25502	P08243;F8WEJ5;C9J057;C9JT45;C9JM09;C9JLN6	ASNS
0.561393	0.834205	1.24222	-0.99283	-0.591047	-1.05394	+	oe_kk47	2.69743	0.0020071	0.00197537	-0.417259	-7.16644	P08559;Q5JPU3;Q5JPU0;Q5JPT9;Q5JPU1;Q5JPU2;P29803	PDHA1
-0.657945	1.15461	0.606292	0.720726	-0.327028	-1.49666			0.368002	0.428547	0.405236	-0.0729224	-0.880016	P08574	CYC1
-0.302495	0.199324	-1.75408	0.847123	1.03619	-0.0260611			0.857942	0.138694	0.0877364	0.216457	1.84561	P08579	SNRPB2
0.892194	1.16253	0.35861	-1.16282	-1.16833	-0.0821773	+	oe_kk47	1.692	0.0203236	0.0127065	-0.295741	-3.7285	P08621;M0QYR1;M0QX04	SNRNP70
1.27412	0.346738	0.957034	-1.13913	-0.781955	-0.656815	+	oe_kk47	2.29543	0.00506489	0.00380745	-0.965784	-5.57765	P08648;H0YIV7	ITGA5
-1.75247	0.219301	0.63692	0.791041	0.70215	-0.596947			0.278493	0.526632	0.565353	0.0380516	0.692667	P08670;B0YJC4;B0YJC5;A0A1B0GTT5;A0A1B0GVG8;P17661;H7C5W5;P41219;A0A1X7SBR3;A0A1W2PR46;P14136;F8W835;A0A1W2PRT3	VIM
-1.30278	-0.812221	0.346084	-0.307051	0.667726	1.40824			0.780244	0.165865	0.111242	0.234013	1.6922	P08754	GNAI3
0.218372	1.08406	1.22534	-0.706251	-0.667937	-1.15358	+	oe_kk47	2.06234	0.00866283	0.0064213	-0.580448	-4.79767	P08758;D6RBE9;D6RBL5;E9PHT9;D6RCN3	ANXA5
1.31816	-1.13197	-1.1865	0.615205	-0.0530927	0.438197			0.321961	0.476474	0.480834	0.126766	0.784745	P09012;M0R268;M0R221;M0R2B8;M0QZG7;M0QXK2;M0R0G9	SNRPA
-1.53769	-0.529876	-0.393527	0.995269	0.473126	0.992702	+	oe_kk47	1.82732	0.0148826	0.0101735	0.502277	4.09756	P09104;F5H0C8;U3KQP4;F5H1C3	ENO2
-0.838176	-1.03671	-0.775127	1.19402	0.466994	0.988998	+	oe_kk47	2.80878	0.00155317	0.00189474	1.26425	7.67033	P09110;H7C131;C9JDE9;H0Y4D4;B4DVF4	ACAA1
0.592734	0.848775	1.17826	-0.532663	-0.845798	-1.24131	+	oe_kk47	2.55535	0.00278388	0.00217411	-0.594306	-6.56582	P09132;A0A087WYR0;A0A2U3TZN1;A0A087WWU9;D6RBG4;A0A2R8Y4M3	SRP19
-1.2768	-0.209543	-1.06282	0.77676	0.991609	0.780796	+	oe_kk47	2.15412	0.00701261	0.00512667	0.722818	5.09384	P09211;A8MX94;A0A087X2E9;A0A2R8Y5E5;A0A087X243	GSTP1
-0.764024	0.830231	-1.61523	0.460002	0.940374	0.14865			0.616106	0.242044	0.175919	0.197214	1.37177	P09234;A0A0A0MRR7;Q5TAL2	SNRPC
-0.521641	-1.12477	-1.00741	1.12652	0.842852	0.684452	+	oe_kk47	2.84675	0.00142315	0.0017975	0.979886	7.84925	P09382;F8WEI7	LGALS1
1.20816	1.04257	0.206106	-0.967129	-1.17261	-0.317098	+	oe_kk47	1.81433	0.0153345	0.0102142	-0.390985	-4.06111	P09417;B7Z415;D6RGG7;H0Y8F7;D6RHJ7	QDPR
-0.822835	-0.866848	-0.971654	1.04843	0.469208	1.14369	+	oe_kk47	2.92698	0.0011831	0.00145345	0.189988	8.23971	P09429;Q5T7C4;B2RPK0	HMGB1
0.885097	0.895958	0.943074	-1.06335	-0.916036	-0.744742	+	oe_kk47	4.37791	4.1888e-05	0.000739726	-5.67056	-19.3685	P09488;E7EWW9;B9ZVX7;A0A0A0MR85;Q03013;H3BRM6;H3BQT3;A6NNT0	GSTM1;GSTM4
1.26177	-1.30354	-1.03769	0.100393	0.222559	0.75651			0.357166	0.439374	0.42298	0.114389	0.857773	P09496;F8WF69;C9J8P9	CLTA
1.35559	0.51652	0.558621	-0.451246	-1.44839	-0.531096	+	oe_kk47	1.73879	0.0182478	0.0114025	-0.467203	-3.85353	P09497;D6RJD1;H0Y9Q6	CLTB
-1.09801	-1.04294	-0.511022	1.02148	1.00606	0.624441	+	oe_kk47	2.82818	0.00148532	0.00192066	1.10718	7.76127	P09525;Q6P452;B4E1S2	ANXA4
0.737046	1.19737	0.711373	-1.0069	-1.10245	-0.536446	+	oe_kk47	2.76861	0.00170369	0.00182575	-0.452491	-7.48504	P09543;K7ERC4;K7EN66;C9K0L8;K7ERZ0	CNP
-0.749318	-1.09405	-0.873383	0.849067	0.850939	1.01674	+	oe_kk47	4.02073	9.53389e-05	0.000446281	1.13438	15.7332	P09622;E9PEX6;F8WDM5;A0A1W2PR83;F2Z2E3	DLD
-1.50927	-0.458598	1.36363	0.591641	-0.3824	0.395002			0.171074	0.674413	0.761385	0.0421486	0.452427	P09661;H0YKK0;H0YMA0;H0YLR3	SNRPA1
-0.642215	-0.932535	-1.1136	1.09994	0.850908	0.737502	+	oe_kk47	3.29919	0.000502123	0.000898969	1.36537	10.295	P09669	COX6C
0.647982	1.00218	1.05731	-0.956266	-0.946435	-0.804773	+	oe_kk47	3.71403	0.000193183	0.00070948	-0.677238	-13.1494	P09874;A0A7I2V3E1;A0A7I2V625;A0A7I2V5E9;A0A7I2V384	PARP1
1.16765	1.05737	0.372575	-1.06668	-0.952647	-0.578274	+	oe_kk47	2.40797	0.00390868	0.00259745	-0.291514	-5.98902	P09960;B4DEH5	LTA4H
0.849464	-0.3313	-1.87332	0.338776	0.389748	0.626628			0.497116	0.318335	0.25672	0.303546	1.13887	P09972;A8MVZ9;J3KSV6;J3QKP5;C9J8F3;K7EKH5;J3QKK1	ALDOC
-1.27305	0.528217	1.47591	0.346694	-0.206432	-0.871339			0.215322	0.609085	0.690532	-0.123763	-0.554008	Q71UI9;P0C0S5;C9J0D1;A0A494C189;C9J386	H2AFV;H2AFZ
1.1211	0.695456	0.842817	-0.558297	-1.17339	-0.927685	+	oe_kk47	2.90528	0.00124371	0.0014362	-2.05564	-8.13238	P0DMN0;P0DMM9;A0A0A6YYL2;H3BPL6;H3BRY5;P50225;H3BNY7;H3BQX5;A0A7I2V2T5;P50226;H3BRT0;E9PKW4	SULT1A4;SULT1A3
0.416545	-1.07083	-1.45456	0.471884	0.790652	0.846315	+	oe_kk47	1.13525	0.0732403	0.0408308	1.03999	2.41396	Q8NHU0;Q5HYN5;Q5DJT8;P0DMV2;P0DMV1;P0DMV0;P0DMU9;P0DMU8;P0DMU7	CT45A3;CT45A1;CT45A2;CT45A9;CT45A8;CT45A7;CT45A10;CT45A5;CT45A6
-0.753616	-0.656724	-0.426493	1.62467	-0.65445	0.866609			0.839262	0.14479	0.0931174	0.0667731	1.80856	P0DP25;P0DP24;P0DP23;E7EMB3;Q96HY3;G3V361;A0A590UJI2;A0A590UJC0;G3V226;M0QZ52;F8WBR5;G3V479;C9J7T9;P27482;P02585	CALM2;CALM1
-0.156288	1.4545	0.922371	-1.23254	-0.525373	-0.462673	+	oe_kk47	1.29855	0.0502863	0.0282842	-0.460833	-2.77086	P0DPB6;A0A0R4J2F3;Q7Z776;A0A087X0U2;A0A1B0GUZ5;P0DPB5
-1.90856	-0.0750407	0.580919	0.82682	0.575043	0.000818682			0.524471	0.298902	0.233357	0.192445	1.19269	P10155;H0Y9N5;G5E9R9;D6RE09;D6RDN1	TROVE2
0.742074	0.981431	0.934438	-0.704388	-0.653827	-1.29973	+	oe_kk47	2.88983	0.00128875	0.00158721	-3.04033	-8.05678	P10253;I3L3L3;I3L0S5	GAA
-0.765669	-0.553719	-1.32604	0.984553	0.820832	0.84004	+	oe_kk47	2.7652	0.00171712	0.0018163	1.64478	7.46947	P10301;E9PQK5;E9PQC5	RRAS
-1.13863	-0.75069	-0.592221	0.290449	0.705373	1.48572	+	oe_kk47	1.89266	0.0128038	0.00902857	0.216663	4.2843	P10586;H0Y6Z7;H0Y7Z9;H0Y4H1;H0Y380;A2A437;Q3KPI9;G8JL96;F5GWR7;P23468	PTPRF
0.809092	0.880466	1.02143	-1.06825	-0.956262	-0.686474	+	oe_kk47	3.81772	0.000152153	0.000770764	-1.22593	-13.9732	P10599	TXN
-0.958513	-0.924024	-0.827339	0.736009	0.823901	1.14997	+	oe_kk47	3.7836	0.000164589	0.000753247	0.976199	13.6968	P10606	COX5B
1.25437	0.866977	0.537235	-1.02675	-0.833891	-0.797942	+	oe_kk47	2.89668	0.00126859	0.00159883	-0.909335	-8.0902	P10620;F5H7F6;F5H6X2;F5GX73;F5H613;F5H760	MGST1
0.648765	0.785365	1.17944	-0.702451	-1.31025	-0.600869	+	oe_kk47	2.5115	0.00307964	0.00244301	-0.482393	-6.38949	P10644;K7EPB2;K7EIE5;K7EID3;K7EJ40;K7EK41;K7EMZ6;K7EQK3;K7EMU2;X6RAV4;K7EM13;K7EPR5;K7EKR1;H7BYW5;C9JSK5;P31321	PRKAR1A
-1.05692	-1.0833	-0.374474	0.617955	1.3891	0.507642	+	oe_kk47	2.01078	0.00975484	0.00730278	0.154556	4.63715	P10768;U3KQT1;X6RA14;H7BZT7	ESD
-1.75497	-0.223769	0.466207	-0.00704474	1.25881	0.260767			0.592122	0.255787	0.189509	0.144377	1.32502	P10809;A0A7I2V599;A0A7I2V2X6;A0A7I2YQK6;A0A7I2V5M1;A0A7I2V5K3;A0A7I2YQ71;A0A7I2V369;E7EXB4;E7ESH4;C9JL25;C9JCQ4;C9JL19;C9J0S9	HSPD1
0.98496	0.829355	0.920882	-0.91083	-0.901393	-0.922973	+	oe_kk47	5.63208	2.33303e-06	0	-0.881891	-40.0042	P11021;A0A7P0TB36;A0A7P0TAI0	HSPA5
2.00777	-0.638766	-0.130205	-0.297862	-0.549441	-0.391497			0.434435	0.36776	0.316475	-0.305908	-1.01441	P11047	LAMC1
-1.44744	0.934744	0.447837	-0.136618	1.04722	-0.845744			0.0157056	0.964483	0.97758	0.000784556	0.0473787	P11142;E9PKE3;E9PNE6;E9PN89;E9PLF4;E9PQQ4;E9PQK7;E9PK54;P54652;E9PPY6;E9PN25;E9PI65	HSPA8
1.11936	-1.27226	-1.20312	0.508941	0.245925	0.601157			0.497608	0.317974	0.256347	0.179484	1.13984	P11166;A0A6Q8PFI8	SLC2A1
0.599864	0.797472	1.18007	-0.344488	-1.11518	-1.11774	+	oe_kk47	2.29281	0.00509554	0.00388406	-0.638392	-5.56837	P11172;E9PFD2;F2Z3P2;F2Z303;F8WDG4	UMPS
1.16809	1.09504	0.21822	-1.04227	-0.354163	-1.08493	+	oe_kk47	1.89206	0.0128215	0.00910864	-0.271756	-4.28255	P11177;C9J634;F8WF02	PDHB
-1.05416	-0.748286	-0.922951	0.925834	0.916926	0.882639	+	oe_kk47	4.45759	3.48666e-05	0.000794118	2.12739	20.2855	P11216;H0Y4Z6	PYGB
1.82664	-0.859709	0.321348	-0.107262	-0.353723	-0.827291			0.460384	0.34643	0.290025	-0.265951	-1.06615	P11233;H7C3P7;C9JPE8;C9JYR1;F8WEQ6	RALA
1.2066	0.83756	0.452239	-1.38085	-0.324187	-0.791357	+	oe_kk47	1.94356	0.0113878	0.00825163	-0.531633	-4.43387	P11234;C9J6B1;C9JQB3	RALB
0.742827	0.860515	1.10285	-0.897372	-0.745862	-1.06295	+	oe_kk47	3.6789	0.000209459	0.000678363	-1.37298	-12.881	P11279	LAMP1
-0.749098	-0.484644	-1.2797	1.22983	0.980944	0.302673	+	oe_kk47	2.00602	0.00986234	0.00736826	0.2073	4.62254	Q5T4U5;P11310;A0A7P0TB51;A0A7P0T8G6;A0A7P0T932;A0A7P0TB55;H0YDT5	ACADM
-0.184112	1.78235	0.426654	-1.05077	-0.367263	-0.606864			1.03139	0.0930272	0.0521504	-0.0910416	-2.19637	P11387;A0A7P0T852;A0A7P0T9R7;E5RIC7;Q969P6;E5RJ95;E5RFS0;E5RJ33;H0YBR3;H0YC03;E5RGE7;E5RGR4;E5RFE3;E5RGR2	TOP1
-0.904486	-0.885582	-0.939077	1.03582	0.914434	0.778888	+	oe_kk47	4.74694	1.79085e-05	0	0.965026	23.9894	P11388	TOP2A
-1.01266	-0.892586	-0.826392	0.844312	0.96611	0.921221	+	oe_kk47	5.01279	9.70979e-06	0	1.58193	27.9777	P11413;E7EUI8;E7EM57;E9PD92	G6PD
1.19083	0.0844105	0.440267	-1.00997	-1.3804	0.674862			0.736884	0.18328	0.124839	-0.235567	-1.60724	P11441;Q5HY81;F8WB70	UBL4A
0.612309	0.913217	1.15299	-0.680812	-1.03633	-0.961375	+	oe_kk47	3.14446	0.000717034	0.00138406	-3.41858	-9.38891	P11498;A0A494C016;A0A494C101;E9PRE7;A0A494C0T2	PC
-1.14403	-0.254789	-1.15058	1.12412	0.820043	0.605243	+	oe_kk47	2.15521	0.00699504	0.00513094	0.343114	5.09744	P11717;A0A7I2V381;A0A7I2YQS7;A0A7I2V657;S4R328	IGF2R
1.05038	0.923365	0.747212	-1.00882	-0.821864	-0.890271	+	oe_kk47	4.20623	6.21971e-05	0.0005625	-1.02194	-17.5289	P11766;H0YAG8;D6RFE4;D6R9G2;D6RAY0	ADH5
0.614827	0.533078	1.23468	-0.0511067	-1.38122	-0.950258	+	oe_kk47	1.61525	0.0242521	0.0143552	-0.909981	-3.529	P11802;F8VYH9;F8VTV8;F8VWX7;F8VZZ0;F8VZ51;F8W1L8;Q96BE9;F8VXD2;F8VYY1	CDK4
-0.382218	1.06649	1.32737	-0.509391	-0.218785	-1.28346			1.01616	0.0963474	0.0542222	-0.274209	-2.16501	P11908;H7C540;D3YTJ7;A6NMS2;A0A6Q8PG31	PRPS2
-1.29361	-1.21518	0.710673	1.01113	0.313476	0.473503			0.805051	0.156657	0.103436	0.104329	1.74099	P11940;A0A7I2V649;A0A7I2YQ88;H0YAR2;E7EQV3;E7ERJ7;A0A087WTT1;A0A7I2V4N4;A0A7I2YQE4;A0A7I2YQ90;Q9H361;H0YBN4;H0YB75;H0YB86;H0YAP2;H0YAS6;E5RJB9;H0YAS7;E5RH24;E5RGH3;H0YAW6;H0YC10;A0A6Q8JFV4;E5RHG7;E5RGC4;Q96DU9;A0A7I2V3J9;E5RFD8;E5RJM8	PABPC1;PABPC3
-0.850902	-0.941312	-0.909129	1.1123	0.972912	0.616136	+	oe_kk47	3.55823	0.000276548	0.000612137	0.717651	11.9987	P12004	PCNA
-0.570555	-0.909751	1.32022	-1.11394	0.797317	0.476712			0.0398064	0.912417	0.941547	0.00892321	0.11711	P12235;V9GYG0	SLC25A4
-1.89168	-0.0119029	0.000331331	0.302621	0.956559	0.64407			0.901787	0.125376	0.0760352	0.418774	1.93305	P12236	SLC25A6
1.50546	0.616957	0.427996	-0.818405	-0.860751	-0.871258	+	oe_kk47	2.1598	0.0069215	0.00503592	-0.397548	-5.11263	P12268;A0A7I2V2T3;E7ETK5	IMPDH2
-0.323479	-0.891022	-0.966257	1.74539	0.33308	0.10229	+	oe_kk47	1.23647	0.0580136	0.0322382	0.0937659	2.63283	P12270;Q5SWX9	TPR
0.663919	0.664113	1.22516	-0.970792	-1.25094	-0.331462	+	oe_kk47	2.17257	0.00672094	0.00506555	-6.0024	-5.15504	P12277;G3V4N7;H0YJG0;G3V461;H0YJK0;G3V2I1;P06732	CKB
-0.0393799	1.00403	1.43239	-0.685791	-0.810072	-0.901174	+	oe_kk47	1.65044	0.0223645	0.0136841	-0.387127	-3.61962	P12429;D6RA82;D6RFG5;D6RCA8;D6RAZ8;D6RFJ9	ANXA3
0.560546	0.866398	1.22171	-1.13105	-0.682195	-0.83541	+	oe_kk47	2.79566	0.00160081	0.001872	-0.221577	-7.60934	P12814;A0A804HII9;A0A804HKE2;A0A804HK61;A0A804HIN7;A0A804HJU8;A0A804HLD0;A0A7I2V4Y4;A0A804HLF4;A0A804HL31;H9KV75;A0A804HJQ9;G3V2N5;H7C5W8;A0A804HI95;P35609;G3V2W4;A0A494C1A0;H0YJW3;A0A804HJN7;A0A804HIY0;H0YJ11;A0A494C166;A0A494C033;A0A804HKG0;G3V2X9;G3V5M4;A0A494C0Q3;G3V380;G3V2E8;A0A494C031	ACTN1
0.249368	-0.673547	-1.70353	0.556915	0.923746	0.647049	+	oe_kk47	1.16058	0.0690908	0.038432	1.6366	2.46806	P12931;H0Y3C5;J3KPD6;P07948;P08631;H7C3Z8;Q9H3Y6;P42685;P06241	SRC
-1.08684	-1.27836	-0.141035	0.898119	0.984369	0.623755	+	oe_kk47	1.97907	0.0104937	0.00755588	0.473317	4.54041	P12955;A0A494C165;K7ES25;A0A494C194;V9GYL0;V9GYE4	PEPD
-1.72445	-0.214671	0.0711995	1.23329	0.672791	-0.0381636			0.867893	0.135552	0.0845521	0.176483	1.86539	P12956;B1AHC9	XRCC6
-1.52067	-0.419159	-0.580392	0.662845	1.0019	0.855478	+	oe_kk47	2.0322	0.00928539	0.00699083	0.346593	4.70335	P13010;C9JZ81;H7C0H9	XRCC5
1.05317	0.619512	0.330653	-1.78766	0.191095	-0.406768			1.00678	0.098451	0.0554017	-0.848043	-2.14575	P13051;F5GYA2;Q68DM5	UNG
-0.747467	-0.833018	-1.10957	0.918812	0.658281	1.11296	+	oe_kk47	3.32901	0.000468803	0.000687631	0.748161	10.4788	P13073;H3BPG0;H3BN72;H3BNV9;Q86WV2;H3BNI5	COX4I1
-1.23138	-0.57441	-0.81195	0.646659	0.726946	1.24414	+	oe_kk47	2.54075	0.00287906	0.00214066	0.991175	6.50667	P13196;H7C4H7;H7C5B0	ALAS1
-1.59289	-0.667075	-0.138885	0.95755	0.867037	0.57426	+	oe_kk47	1.65495	0.0221335	0.0135759	0.444807	3.63136	P13473;H0YCG2	LAMP2
-0.0883533	-1.45523	-0.719316	0.130816	0.882869	1.24921	+	oe_kk47	1.37017	0.0426413	0.0244563	0.311218	2.93406	P13489;H0YCR7;E9PIM9;E9PMJ3;E9PLZ3;E9PIK5;E9PMN0;E9PMA9;E9PR82;E9PMI1	RNH1
0.827466	0.937084	0.959471	-0.744589	-1.02909	-0.950345	+	oe_kk47	4.37154	4.2507e-05	0.00072973	-0.313775	-19.2969	P13639	EEF2
-0.878671	-0.733797	-1.06285	1.20352	0.85477	0.617028	+	oe_kk47	3.09963	0.000795005	0.00151389	0.361144	9.14061	P13667	PDIA4
1.4371	0.732642	0.0231575	-1.40539	-0.630665	-0.156845	+	oe_kk47	1.25489	0.0556045	0.0313141	-0.126391	-2.67347	P13674	P4HA1
0.314445	0.163744	-1.80103	-0.37776	0.705601	0.995			0.479122	0.331801	0.273005	0.201111	1.10332	P13716;B7ZBK6	ALAD
0.91022	1.00184	0.820374	-0.897059	-0.863877	-0.971497	+	oe_kk47	5.11735	7.6322e-06	0	-0.975569	-29.7206	P13797;A0A0A0MSQ0;U3KQI3;H7C4N2;Q5TBN3;F2Z2Z9	PLS3
0.996653	0.846303	0.872068	-0.701009	-1.07915	-0.93486	+	oe_kk47	3.9548	0.000110969	0.000412214	-0.836913	-15.1393	P13804;H0YLU7;H0YL12;H0YK49;H0YNX6;H0YL83;H0YM12	ETFA
-1.62873	-0.562688	0.150338	0.0441971	0.919989	1.07689	+	oe_kk47	1.05037	0.0890492	0.0495549	0.206253	2.23566	P13807;M0QYU1;P54840	GYS1
-0.193496	0.996989	1.4421	-0.500123	-0.632468	-1.113	+	oe_kk47	1.34012	0.0456962	0.0259424	-0.567244	-2.86505	P13861;H7C330;H7C1L0;H7C4A9;P31323	PRKAR2A
0.851272	0.942586	0.935486	-0.776221	-0.945961	-1.00716	+	oe_kk47	4.76534	1.71656e-05	0	-5.04881	-24.2463	P13928;A0A087WTN9;A0A087WUP0;A0A075B765	ANXA8;ANXA8L1
0.861324	0.866598	0.999167	-0.996128	-0.769538	-0.961423	+	oe_kk47	4.5764	2.65216e-05	0.000915254	-3.42508	-21.7325	P13929;E5RGZ4;K7EPM1;K7EKN2;E5RI09;E5RG95;K7EP84;E5RJH5;U3KQQ1	ENO3
-0.785798	-0.168752	0.0301623	0.137318	1.81208	-1.02501			0.28995	0.51292	0.542262	0.084123	0.717167	P13984	GTF2F2
-0.940916	-0.892214	-0.784751	1.39878	0.648948	0.570149	+	oe_kk47	2.54175	0.00287243	0.00214301	1.11153	6.5107	P14174	MIF
-0.183013	0.870268	0.479913	-1.86434	-0.0119793	0.709155			0.398568	0.399422	0.360345	-0.0586421	-0.942236	P14324;A0A087WVN4;A0A087X1D8;A0A087X090;A0A087WTP2	FDPS
1.12562	0.741082	0.603569	-1.44939	-0.824789	-0.19609	+	oe_kk47	1.85603	0.0139306	0.00958852	-0.280138	-4.17889	P14550;Q5T621;V9GYG2;V9GYP9	AKR1A1
1.01884	0.797863	0.898469	-0.783023	-1.10464	-0.827509	+	oe_kk47	3.96033	0.000109565	0.000418605	-0.390532	-15.1883	P14618;B4DNK4	PKM
-0.872494	-0.975965	-0.867682	0.686106	1.04748	0.982561	+	oe_kk47	3.99693	0.000100709	0.000430279	1.60416	15.5163	P14854;A0A494C160	COX6B1
0.550634	-0.889917	-1.58682	0.467107	0.501081	0.957911			0.924534	0.118978	0.0718396	0.174963	1.9787	P14866;M0QXS5	HNRNPL
-0.857504	-0.953243	-0.921315	1.02318	0.863355	0.845531	+	oe_kk47	5.06671	8.5761e-06	0	0.485509	28.8634	P14868;H7BZ35;C9J7S3;C9JLC1;H7C278;C9JQM9	DARS
1.12419	-0.556849	1.33204	-1.12039	-0.605246	-0.173738			0.897999	0.126474	0.0771363	-0.153852	-1.92546	P14923;C9JTX4;C9J826;C9JK18;C9JKY1;C9JPI2;K7ERP3	JUP
-0.975447	-0.645302	-1.05631	0.972203	1.09517	0.60969	+	oe_kk47	3.12375	0.000752056	0.00135221	0.567063	9.27345	P14927;B7Z2R2;E5RHG9	UQCRB
0.487888	1.20559	0.968727	-0.957228	-0.839977	-0.865003	+	oe_kk47	2.93679	0.00115667	0.00148694	-0.750443	-8.28862	P15121;E9PCX2;E9PEF9	AKR1B1
1.08087	0.729924	0.786403	-0.335715	-1.20376	-1.05772	+	oe_kk47	2.40549	0.00393106	0.00259238	-3.34953	-5.97971	P15144	ANPEP
0.877193	0.944216	0.913683	-0.858366	-0.882101	-0.994625	+	oe_kk47	5.60578	2.47868e-06	0	-0.925463	-39.4019	P15170;H3BR35;H3BSV8	GSPT1
0.913883	0.919496	0.894977	-0.976815	-0.998746	-0.752795	+	oe_kk47	4.67748	2.10145e-05	0.00103846	-8.22821	-23.0436	P15328	FOLR1
-1.76959	-0.495264	0.108528	0.889406	0.728047	0.538874	+	oe_kk47	1.20062	0.0630057	0.0346162	0.183758	2.55448	P15374;A0A087WTB8;Q5TBK7	UCHL3
1.0856	-1.24193	-1.11491	-0.148476	0.654124	0.765595			0.451338	0.353722	0.298656	0.240372	1.04815	P15529	CD46
-0.926654	-0.925371	-0.865666	1.05465	0.973791	0.689246	+	oe_kk47	4.05887	8.73233e-05	0.000477876	0.508767	16.0871	P15559;B4DLR8;H3BNV2;H3BRK3	NQO1
-1.84476	-0.165342	-0.130281	0.806296	0.587844	0.746242	+	oe_kk47	1.17807	0.0663636	0.0365456	0.58009	2.50566	P15586;H7C3P4;F6S8M0;F5H4C6;H0YFA9	GNS
1.18913	-0.820286	-1.55613	0.482201	0.424893	0.280197			0.40845	0.390436	0.348049	0.0677567	0.962203	P15880;H0YEN5;E9PQD7;E9PMM9;I3L404;E9PPT0;E9PM36;H3BNG3;H0YE27	RPS2
-0.7389	-0.536764	-1.3566	0.95392	0.899039	0.779305	+	oe_kk47	2.65116	0.00223275	0.002019	1.8796	6.96577	P15924;A0A804HL18	DSP
-0.262916	0.799487	1.27381	-0.968069	-1.25098	0.408661			0.815726	0.152853	0.099268	-0.29701	-1.76204	P15927;Q5TEJ0;Q5TEJ7	RPA2
-0.63623	-0.752434	-1.27661	0.979901	0.74551	0.939861	+	oe_kk47	2.97216	0.0010662	0.00136463	0.837871	8.46726	P16070;H0YD13;H0Y2P0;H0YDW7;H0YCV9;H0Y5E4;H0YE40;H0YDX6;E9PKC6;H0YD17;Q86UZ1;H0YF08;H0YD90;J3KN83;H0YEV3;H0YEU1	CD44
0.978107	0.924972	0.795842	-0.813412	-0.702795	-1.18271	+	oe_kk47	3.50366	0.000313574	0.000570025	-3.53265	-11.6189	Q5TD07;P16083;Q5TD05;A2A2U4	NQO2
-0.0703377	-0.386163	-0.506717	1.97263	-0.811655	-0.197759			0.306116	0.494179	0.509676	0.211708	0.751448	P16104	H2AFX
0.897862	1.09907	0.697427	-1.08057	-0.928768	-0.685022	+	oe_kk47	3.40937	0.00038961	0.000524887	-1.82833	-10.9895	P16144;J3KSH9;J3QQL2	ITGB4
0.62856	0.827361	1.20994	-0.7884	-0.748452	-1.12901	+	oe_kk47	2.97918	0.00104911	0.00137107	-0.655845	-8.50313	P16152;E9PQ63;A8MTM1	CBR1
0.887342	1.09451	0.712681	-0.793097	-1.13782	-0.763613	+	oe_kk47	3.41287	0.000386483	0.00052968	-0.800067	-11.0123	P16219;E9PE82	ACADS
0.673013	0.785059	0.749148	-0.980622	-1.52314	0.296542	+	oe_kk47	1.27718	0.0528226	0.0299159	-0.82571	-2.723	P16220;C9JBT4;C9J896;E9PAR2;C9J4L5;H7C3I0;E7EWP8;G5E998;H7C1R5	CREB1
-0.306792	1.16398	1.36045	-0.745124	-0.910673	-0.561843	+	oe_kk47	1.29379	0.0508405	0.0287628	-0.420333	-2.76017	P16278;E7EQ29;C9J4G9;C9J539	GLB1
0.0603789	0.111235	1.81985	-0.204687	-1.0237	-0.763069			0.993559	0.101494	0.0582532	-0.242292	-2.11867	P16333;C9JVV5;C9J869;C9K098;C9J0K5;H7C5C7;C9JAB9;E7ERP6;E9PEE2;E7EPF5;O43639	NCK1
-0.0364286	-0.823833	-1.47144	1.25399	0.567444	0.510267	+	oe_kk47	1.50202	0.031476	0.0180486	0.506934	3.24663	P16401	HIST1H1B
0.0286688	-1.84994	-0.272718	0.786967	0.533031	0.773996	+	oe_kk47	1.11585	0.0765861	0.0425855	3.21627	2.37281	P16402	HIST1H1D
1.20272	0.218005	-0.110953	-0.0371733	-1.79442	0.521823			0.471976	0.337306	0.278109	-0.115665	-1.08916	P16403	HIST1H1C
-1.94295	0.280351	0.159274	0.996194	0.253908	0.253221			0.586194	0.259302	0.19324	0.222438	1.31346	P16435;H0Y4R2;E7EMD0;E7EWU0;C9JU80	POR
-0.476927	1.68582	0.757557	-0.455993	-0.692131	-0.818331			0.966423	0.108038	0.0635583	-0.209271	-2.06338	P16615;H7C5W9;O14983;Q93084;J3QSY6;H3BVB2;H3BTW4	ATP2A2
1.10959	0.977269	0.555669	-0.88322	-1.17743	-0.581869	+	oe_kk47	2.73872	0.00182507	0.00177497	-0.832209	-7.34974	P16930;A0A804HJ13;A0A804HJX2;H0YLC7;B7Z4W2;H3BNP8	FAH
-0.386098	-0.995005	-1.22322	1.11451	0.665096	0.824718	+	oe_kk47	2.45002	0.00354797	0.0026135	0.719774	6.14904	P16949;A2A2D0;E5RIR6;E7EVN3;Q9H169	STMN1
1.35652	-0.497686	-1.56725	-0.149189	0.610329	0.247272			0.207159	0.620642	0.704288	0.0868594	0.535579	P16989;A0A0D9SEI8;Q9Y2T7	YBX3
-1.06362	-0.842503	-0.619768	0.7318	1.45824	0.335846	+	oe_kk47	2.05473	0.00881597	0.00645101	1.08418	4.77372	P17050	NAGA
-0.382907	-0.876875	-1.28029	0.570331	0.684796	1.28495	+	oe_kk47	2.11391	0.0076929	0.00560778	1.11886	4.96242	P17096;A0A669KAX1;A0A1W2PRV2	HMGA1
-0.632322	0.17576	1.51936	-1.28423	-0.431067	0.652495			0.349592	0.447103	0.435589	-0.164758	-0.842164	P17152	TMEM11
-0.990178	-0.794053	1.8394	0.0247509	-0.0702025	-0.00971625			0.0133235	0.969787	0.98028	-0.00342941	-0.0402971	P17174	GOT1
0.751102	0.607564	1.25992	-0.559315	-0.877721	-1.18156	+	oe_kk47	2.54684	0.00283897	0.00215725	-0.942415	-6.53129	P17252;J3KRN5;P05771;M0R0I9;H3BV73;J3KN97;A0A804HHY0;A0A804HIU5;P05129	PRKCA
0.516382	1.05302	1.08874	-0.938366	-1.05964	-0.66014	+	oe_kk47	2.89197	0.00128242	0.00158952	-0.599293	-8.0672	P17301	ITGA2
-1.18767	-0.595511	-0.892525	0.994465	0.706513	0.974726	+	oe_kk47	3.10488	0.000785453	0.00133101	1.61129	9.16936	P17568	NDUFB7
1.20947	0.748083	0.715702	-0.79923	-0.749174	-1.12485	+	oe_kk47	3.07186	0.000847501	0.00147797	-0.736805	-8.98983	P17612;A0A7I2V5J4;Q15136;K7ERP6;B7Z708;A0A7I2YQ82;K7EMV1;K7ENJ5	PRKACA
-0.703998	-0.475242	-0.100825	-1.14447	1.31065	1.11388			0.456007	0.34994	0.294656	0.0568447	1.05745	P17655	CAPN2
1.44842	0.206998	0.769345	-0.35611	-1.01363	-1.05503	+	oe_kk47	1.72245	0.0189474	0.0119271	-0.919255	-3.80954	P17676	CEBPB
1.51363	-0.470677	0.70025	-0.423025	-1.34808	0.0278988			0.759055	0.174159	0.117704	-0.390039	-1.65063	P17813;F5GX88	ENG
-1.46786	0.806532	1.38302	-0.38103	0.0283406	-0.368994			0.211925	0.613868	0.697018	-0.0291258	-0.546355	P17844;J3KTA4;A0A7I2V2S0;A0A7I2V507;A0A0G2JLI4;A0A7I2V5F5;J3QRQ7;J3KRZ1;J3QSF1;J3KTQ4;J3QR02;X6RLV5;J3QKN9;J3QRN5;J3QR62;J3QLG9;J3QS79	DDX5
-0.719845	1.07872	1.40408	-0.482989	-0.256367	-1.0236			0.775275	0.167774	0.112515	-0.310783	-1.68244	P17858;F8WEU2	PFKL
-0.889728	-1.39223	-0.260531	0.82082	0.708564	1.01311	+	oe_kk47	2.12441	0.00750914	0.00547386	1.55453	4.99649	P17900;H0YBY3;E5RJD0	GM2A
0.973665	0.919241	0.793764	-0.982361	-0.569716	-1.13459	+	oe_kk47	3.27068	0.000536192	0.000882591	-4.96098	-10.1221	P17931;G3V3R6	LGALS3
-0.669279	-0.999967	-1.02433	1.07983	0.938688	0.675062	+	oe_kk47	3.39428	0.000403385	0.000514412	0.487232	10.8919	P17987;E7ERF2;E7EQR6;F5H282;F5GZ03;F5GZI8;F5GYL4	TCP1
-0.255347	1.061	-1.15606	0.974774	0.50252	-1.12689			0.0919855	0.809123	0.873521	0.0403093	0.25802	P18031;B4DSN5	PTPN1
-0.234734	-0.125482	-0.0722712	1.86239	-0.249599	-1.18031			0.116289	0.765087	0.839588	0.0270055	0.319857	P18077;C9K025;F8WBS5;F8WB72	RPL35A
-1.15898	-0.915607	-0.619907	0.84728	0.852396	0.994823	+	oe_kk47	3.41215	0.000387124	0.000528474	4.61635	11.0076	P18084;V9GZ57;H7C4W1;V9GYZ1;H7C5U2;H7C580;V9GYD8	ITGB5
0.736944	1.03114	0.948414	-0.907254	-0.773524	-1.03572	+	oe_kk47	4.01086	9.75304e-05	0.000439024	-0.648095	-15.6429	P18085;C9JPM4;C9JAK5;U3KQF2	ARF4
0.735294	0.22929	1.39297	-0.899285	-1.2743	-0.183974	+	oe_kk47	1.55762	0.0276936	0.0162513	-0.205098	-3.38358	P18124;A8MUD9;C9JIJ5;C9JZ88	RPL7
-0.680704	-0.981063	-1.02866	0.809826	0.72595	1.15465	+	oe_kk47	3.33559	0.000461753	0.000693446	0.243538	10.5197	P18206;A0A096LPE1	VCL
0.932615	1.27795	-0.00908525	-0.0330171	-0.815183	-1.35328	+	oe_kk47	1.26817	0.0539299	0.0305455	-0.250551	-2.70295	P18583;J3QSZ5	SON
0.660864	1.31518	0.616049	-0.625757	-0.728989	-1.23735	+	oe_kk47	2.37501	0.00421687	0.00304323	-0.484384	-5.86605	P18615;A0A0A0MT02;A0A0A0MSN9;A0A0G2JI50;E9PD43;A2ABK4;E7ENC7;E7EWR7	NELFE
1.96453	-0.103932	-0.163428	-0.662924	-0.770909	-0.263337			0.722565	0.189424	0.129477	-0.251729	-1.57926	P18669;P15259;Q8N0Y7	PGAM1
0.553784	0.930546	1.18891	-0.987668	-0.748375	-0.9372	+	oe_kk47	3.07167	0.000847871	0.00147547	-0.375159	-8.98884	P18754;C9JW69;C9JRH2;C9J3R0;C9JMJ4;C9JQZ4	RCC1
-0.895009	-1.05815	-0.760566	0.774978	1.07151	0.867232	+	oe_kk47	3.90823	0.000123529	0.000394161	3.56565	14.733	P18858;F5GZ28;M0R0Q7;B4E135;M0R1S4;M0QY71;M0R1G7	LIG1
1.28916	-0.261311	-1.06344	-1.09484	0.17711	0.953329			0.00855074	0.980504	0.987465	0.00386047	0.0259987	P18859;A8MUH2	ATP5J
-1.4545	-0.50439	-0.565585	0.658785	0.672347	1.19335	+	oe_kk47	2.04907	0.00893162	0.00668213	0.822041	4.75596	P19174;V9GY71;V9GYH5;V9GY63;A0A0D9SEK2	PLCG1
-0.455021	1.59643	0.902676	-0.615814	-0.591024	-0.837252	+	oe_kk47	1.05396	0.0883161	0.0490082	-0.194284	-2.24311	P19367;B1AR62;Q2TB90;A0A2R8Y626	HK1
-1.37073	1.10763	1.10925	-0.0104856	-0.814406	-0.0212616			0.258619	0.551291	0.607042	-0.149368	-0.649734	P19387;H3BRR2	POLR2C
-1.49981	-0.812355	-0.173219	0.856968	0.828239	0.800174	+	oe_kk47	1.90553	0.01243	0.00864644	1.21741	4.32178	P19447;A0A2R8Y6W8;A0A2R8Y681;H7C309;A0A2R8YES7;A0A2R8Y5L2;A0A2R8Y762	ERCC3
-0.0313261	0.907043	1.47858	-0.882422	-0.482751	-0.989126	+	oe_kk47	1.5504	0.0281579	0.0164444	-0.370836	-3.36562	P19623;K7ESL0;K7EQ47;K7EL89;K7EKM4	SRM
0.327443	-0.760451	-1.53605	1.30831	0.218392	0.44235			0.969201	0.107349	0.0630791	0.175275	2.06902	P19784;H3BNI9;H3BSA1	CSNK2A2
1.42409	0.996575	-0.33787	-0.171329	-0.890831	-1.02064	+	oe_kk47	1.10154	0.0791517	0.0440937	-0.233465	-2.34261	P19838;A0A494C1E9;A0A494C157;D6RH30;D6RF93;D6RC45	NFKB1
1.08398	0.8041	0.818733	-0.973243	-0.696131	-1.03744	+	oe_kk47	3.69585	0.000201442	0.000692537	-3.77662	-13.0099	P20020;E7ERY9;A0A0U1RQU3;A0A804HKZ0;A0A2R8Y4R4;Q16720;Q01814;H0YHH6;A0A2U3U055;A0A2U3TZI3;F8W1V5;A0A2R8Y535	ATP2B1
1.05416	0.549189	0.993656	-0.928365	-1.2501	-0.418544	+	oe_kk47	2.40435	0.0039414	0.00258984	-0.212475	-5.97542	P20042	EIF2S2
0.50101	-1.2374	-0.611584	1.54068	0.3788	-0.571503			0.493078	0.321308	0.259888	0.105414	1.1309	P20073	ANXA7
-1.88852	-0.233192	0.654004	0.114478	0.783123	0.570103			0.563725	0.273071	0.206587	0.177148	1.26958	P20290;A0A7I2V5Y3	BTF3
-1.08556	-0.859545	-0.771985	1.03702	0.835275	0.844798	+	oe_kk47	4.03439	9.23868e-05	0.000457627	2.51982	15.8591	P20337	RAB3B
-0.840072	-0.387584	-1.33733	0.846923	1.14403	0.574041	+	oe_kk47	2.22903	0.0059016	0.00417422	1.21699	5.34597	P20338;A0A087WYT5;P61018	RAB4A
-0.260727	-1.53423	-0.557118	1.15481	0.928401	0.268862	+	oe_kk47	1.5455	0.0284774	0.0167398	0.344741	3.35346	P20340;F5H3K7;F5GX61;C9JB90;C9J0I2;Q14964	RAB6A
-0.102988	1.77992	-0.0270678	-1.30452	-0.000695236	-0.344651			0.686854	0.205658	0.143075	-0.0905266	-1.50958	P20585;A0A590UKC9;A0A590UJW0;A0A590UJN8	MSH3
-1.40127	1.50499	0.392499	-0.241439	0.385767	-0.640549			0.135974	0.731183	0.812995	-0.0288715	-0.368488	P20618	PSMB1
1.54255	0.24583	0.0670907	-1.18317	-1.01795	0.345653			0.856298	0.13922	0.0880893	-0.362709	-1.84234	P20645;F5GX30;F5GXE0;H0YGE9;F5GXU0;F5H883;H0YGT2;F5H4U1;H0YF90	M6PR
-1.09073	-0.989886	-0.35465	0.210838	1.41732	0.807102	+	oe_kk47	1.75142	0.0177247	0.011112	0.560734	3.88772	P20674;H3BNX8;H3BRM5;H3BV69;H3BRI0	COX5A
1.51697	0.567542	0.407954	-0.554694	-0.856888	-1.08089	+	oe_kk47	1.92981	0.0117541	0.00841637	-0.369526	-4.39309	P20700;E9PBF6;A0A0D9SFE5;A0A0D9SFY5	LMNB1
0.460448	1.03231	1.16595	-0.919293	-0.919805	-0.819606	+	oe_kk47	2.89802	0.00126468	0.00160588	-0.508465	-8.09678	P20839;C9J381;A0A3B3IRL5;C9K0R9;C9J029;H7C5T1;H7C511	IMPDH1
-1.9061	0.400135	0.70541	0.323306	0.733938	-0.256691			0.241081	0.574009	0.640531	0.266663	0.611344	P20936;E9PGC0	RASA1
1.73091	-0.217801	-0.8034	-0.998263	0.513657	-0.225106			0.207625	0.619976	0.703785	-0.0867189	-0.536634	P20962;F5GXR3	PTMS
0.908148	0.942748	0.884173	-0.994978	-0.850139	-0.889952	+	oe_kk47	5.60019	2.51079e-06	0	-5.45379	-39.275	P21266;A0A0A0MTN3	GSTM3
0.30453	-1.26963	-1.2525	0.961885	0.54743	0.708279	+	oe_kk47	1.29372	0.0508487	0.0287485	0.136162	2.76001	P21281;H0YC04;C9JL73;P15313;C9JNS9;E5RGH6	ATP6V1B2
-1.65038	-0.238038	-0.483241	1.02693	0.555445	0.789283	+	oe_kk47	1.58959	0.0257282	0.0146288	1.97349	3.4638	P21283;E7EV59	ATP6V1C1
0.729563	1.0777	0.910141	-0.809459	-0.989929	-0.918018	+	oe_kk47	4.04714	8.9714e-05	0.000469565	-1.57663	-15.9774	P21291;E9PS42;E9PND2;E9PP21;A0A087X134	CSRP1
1.60419	0.658652	0.123608	-0.871069	-0.945459	-0.569924	+	oe_kk47	1.62451	0.0237405	0.0140924	-0.192867	-3.55273	P21333;A0A7P0NMY4;F8WE98;A0A087WWY3;A0A7I2V3E6;H0Y5C6;H0Y5F3;A0A669KBC6;H7C2E7	FLNA
-1.19951	-0.75381	-0.722878	1.12397	0.810589	0.741636	+	oe_kk47	3.11171	0.000773197	0.00134271	0.697046	9.20689	P21399	ACO1
-0.949236	-0.959657	-0.825915	0.954118	0.883033	0.897656	+	oe_kk47	5.53834	2.89508e-06	0	3.40863	37.8983	P21589;Q96B60;H0Y7R7;H0Y3X5	NT5E
-1.71696	0.396347	-0.568194	0.65294	1.05502	0.180849			0.887751	0.129494	0.0798715	0.108063	1.90498	P21796;C9JI87	VDAC1
-1.68634	0.291395	-0.412217	0.86247	-0.124042	1.06873			0.812907	0.153848	0.100489	0.22392	1.75648	P21912;A0A087WWT1;A0A087WXX8	SDHB
-0.760753	-0.0879079	-0.0187366	-1.11185	0.20916	1.77009			0.266968	0.540794	0.590504	0.174616	0.66784	P21953	BCKDHB
-1.31886	-0.728102	-0.589304	0.92561	1.03322	0.677431	+	oe_kk47	2.68422	0.00206909	0.00208333	1.0283	7.10863	P21964;A0A7I2V370;E7EMS6;E7EUU8;A0A7I2V3G7;H7BZ45;F8WBW9	COMT
-1.07993	-0.790387	-0.855475	0.921683	0.88962	0.914486	+	oe_kk47	4.48363	3.28375e-05	0.00081203	1.18574	20.5943	P21980;A2A299;A2A2A0;A0A087WZC4;A0A087WVW4;A0A087WVS3;P49221;O43548	TGM2
-1.48304	-0.535884	-0.514381	0.901352	1.04482	0.587133	+	oe_kk47	2.08517	0.00821921	0.00631879	0.616739	4.87007	P22033	MUT
-1.31425	-0.89718	0.327609	1.37594	0.66522	-0.157341			0.882961	0.13093	0.0810558	0.229024	1.89541	P22059;H0YCV6;H7C1R2;H7C368;H7C428	OSBP
-0.704276	0.919606	1.23176	0.459877	-0.717527	-1.18944			0.55104	0.281164	0.214662	-0.0996984	-1.24477	P22087;M0QXL5;M0R299;M0R2Q4;M0R0P1;M0R2U2;M0R1H0;M0R2B0	FBL
0.625411	0.824829	1.18791	-0.991287	-1.12232	-0.524543	+	oe_kk47	2.70028	0.00199398	0.00198269	-0.21034	-7.17896	P22102;F8WD69;C9JBJ1;C9JTV6;C9JZG2;C9JKQ7;A0A140TA71;H7C366	GART
0.787892	1.01344	0.925231	-0.969476	-0.799299	-0.957786	+	oe_kk47	4.53752	2.90055e-05	0.000870968	-0.766412	-21.2481	P22234;E9PBS1;D6RF62	PAICS
0.653051	0.95106	1.05464	-0.826039	-0.604104	-1.2286	+	oe_kk47	2.89849	0.00126331	0.00160825	-0.372815	-8.0991	P22307;H0YF61;E9PLD1;H0YCB0	SCP2
0.695601	0.902672	1.00974	-1.06996	-0.348246	-1.18981	+	oe_kk47	2.47407	0.00335683	0.00266528	-0.154305	-6.24217	P22314;Q5JRR6;Q5JRR9;Q5JRS0;Q5JRS2;Q5JRS1;Q5JRS3	UBA1
-0.939702	-1.18452	-0.439055	0.820269	0.465784	1.27723	+	oe_kk47	2.2206	0.00601728	0.00436742	0.555929	5.31712	P22570;A0A0C4DFN8;A0A0A0MSZ4;A0A0A0MT64;A0A0A0MTN9;J3QQX3;A0A0A0MTR6;A0A0C4DGN7;J3QKZ8;J3QQW7;J3KS64	FDXR
0.321064	0.759855	1.31773	-0.143597	-1.02779	-1.22726	+	oe_kk47	1.65445	0.022159	0.0135677	-0.306539	-3.63004	P22626;A0A7I2V323;A0A7I2V4N1;A0A7I2V3P1;A0A7I2V4I6;A0A7I2V3P7;A0A7I2V4S4;A0A024RA28;A0A087WUI2;A0A7I2V4N0;A0A7I2YQN4	HNRNPA2B1;HNRPA2B1
0.204258	-1.80914	-0.291408	0.556803	0.22634	1.11315			0.894993	0.127352	0.077599	0.766124	1.91945	P22670	RFX1
-0.0539712	-1.37947	-1.02944	0.872579	0.730072	0.860232	+	oe_kk47	1.83283	0.014695	0.0100526	0.669607	4.11308	P22695;H3BRG4;H3BSJ9;H3BP04;H3BUE4;H3BUI9;A0A087WVZ4	UQCRC2
-0.387157	-1.48824	-0.608639	0.456894	1.03997	0.987175	+	oe_kk47	1.90101	0.01256	0.0087544	1.77485	4.30859	P22830;A0A499FJN5;K7ELX4;K7EJX5;K7EJM8	FECH
-0.879023	-0.654161	-1.16185	0.981193	0.761737	0.952106	+	oe_kk47	3.42279	0.000377755	0.000537037	2.86968	11.0771	P23229;C9JXX7;H7BZ97	ITGA6
1.43419	-0.61595	-1.1932	0.096033	-0.599402	0.878329			0.0991365	0.795909	0.862648	0.0244319	0.276435	P23246;H0Y9K7;H0Y9U2	SFPQ
-1.54391	-0.957375	0.734018	0.723198	0.737618	0.306446			0.778862	0.166394	0.111514	0.228455	1.68948	P23258;A0A7P0T9G6;Q9NRH3;K7EIS0;K7EKE5	TUBG1;TUBG2
0.982377	1.15324	-1.12568	-0.401617	-1.04291	0.434588			0.326142	0.471909	0.474264	-0.0531909	-0.793483	P23381;G3V3Y5;G3V3H8;G3V277;G3V5U1;H0YJP3;G3V456;G3V423;G3V3P2;G3V227;G3V2Y7;G3V3X0;G3V5W1;G3V3S7;G3V3R3;G3V4N8;G3V4C7;G3V2C0;G3V339;G3V313;G3V4S4;G3V2F2	WARS
-0.173608	-0.2372	0.548182	1.11067	-1.76435	0.516311			0.0339427	0.92482	0.950202	-0.00349681	-0.10045	P23396;E9PL09;E9PPU1;F2Z2S8;H0YCJ7;H0YEU2;H0YF32;E9PQ96;E9PJH4;E9PK82;E9PSF4;E9PQX2;H0YES8	RPS3
0.594595	-1.04535	-1.44842	0.29179	1.00214	0.605253			0.897809	0.126529	0.0771055	0.330812	1.92508	P23434;H3BUH9;A0A1W2PQV2;H3BNV1;A0A1W2PRH4;A0A1W2PPE4;A0A1W2PNX3;A0A1W2PPQ1;A0A1W2PS29	GCSH
0.0409411	-1.74403	-0.527269	0.812365	0.627228	0.790767	+	oe_kk47	1.31454	0.0484685	0.0274166	1.79483	2.80693	P23443;E9PIP7;K7EIM2;K7ER06	RPS6KB1
-1.04757	-0.836621	-0.83951	0.870234	0.819745	1.03373	+	oe_kk47	4.35291	4.43701e-05	0.000705882	0.887021	19.0892	P23526	AHCY
-1.88508	0.160234	0.471976	0.850318	0.645103	-0.242549			0.441715	0.361647	0.308329	0.148354	1.02896	P23528;G3V1A4;E9PP50;E9PK25;E9PQB7;E9PLJ3;E9PS23	CFL1
1.04743	0.848629	0.793217	-0.607733	-1.13501	-0.946533	+	oe_kk47	3.3153	0.000483838	0.000683333	-2.17192	-10.3939	P23634	ATP2B4
-1.38179	-0.728072	-0.230558	1.41347	0.263593	0.663356	+	oe_kk47	1.52036	0.0301745	0.017736	0.472743	3.29143	P23919;H7C312;H7BZ20;G5E9E9;H7C3A4	DTYMK
0.743851	0.95623	1.02638	-0.930156	-0.885795	-0.910511	+	oe_kk47	4.53038	2.94863e-05	0.000864	-1.71694	-21.1603	P23921;E9PL69;H0YCY7;E9PP77	RRM1
0.184741	-1.9871	0.687573	0.662235	0.268686	0.183863			0.373524	0.423132	0.396291	0.356808	0.89131	P24385;F5H437	CCND1
-0.789083	0.906204	1.38311	-0.32235	0.0612671	-1.23915			0.584216	0.260486	0.194675	-0.111017	-1.3096	P24534;C9JZW3;F2Z2G2;F8WF65	EEF1B2
-1.26026	-0.680955	-0.543484	1.10317	1.18136	0.200166	+	oe_kk47	1.90323	0.012496	0.00877292	0.153777	4.31507	P24539;Q5QNZ2	ATP5F1
0.0354323	-0.873567	1.42511	-1.01087	-0.52731	0.951201			0.16531	0.683424	0.771117	-0.0581074	-0.438864	P24666;G5E9R5;F2Z2Q9;D3YTI2	ACP1
-0.466719	-0.949841	-0.72591	1.04356	-0.361646	1.46056	+	oe_kk47	1.18098	0.0659204	0.0362976	0.197024	2.51195	P24752;A0A5F9ZHL1;A0A5F9ZHJ7;A0A5F9ZHJ0;A0A5F9ZHD4;A0A5F9ZI66;A0A5F9ZHH9;H0YEL7;A0A5F9ZHL7;E9PRQ6	ACAT1
-0.0345432	0.449823	-1.95992	0.20686	0.762651	0.575126			0.613178	0.243681	0.177347	0.819326	1.36607	P25098;E9PRV7;P35626;Q8N433	ADRBK1
0.177444	1.01706	0.952672	-0.524952	0.0359906	-1.65821	+	oe_kk47	1.18759	0.0649247	0.0355432	-0.103727	-2.52623	P25205;J3KQ69;A0A499FHX9;Q7Z6P5	MCM3
0.794677	0.704181	1.1086	-1.03647	-1.19498	-0.376018	+	oe_kk47	2.4704	0.00338532	0.00265973	-0.443356	-6.2279	P25325;B1AH49	MPST
0.113125	0.187901	1.82396	-0.718124	-0.458748	-0.948113	+	oe_kk47	1.15687	0.0696835	0.0387351	-0.246698	-2.46011	P25398	RPS12
1.41968	0.829718	0.119891	-0.275152	-0.965628	-1.12851	+	oe_kk47	1.58414	0.0260531	0.0149606	-0.804696	-3.45006	P25490;H0YJV7;A0A494C032;H0YJU4;O15391;Q96MM3	YY1
0.73377	0.602028	1.27378	-1.02351	-0.500398	-1.08567	+	oe_kk47	2.4844	0.00327793	0.00249367	-0.459799	-6.28254	P25685;M0QXK0;A0A7I2V3K7;M0R080;M0R1D6;M0QZD0;M0QYT3;M0R128;A0A1B0GX60;A0A7I2YQW1	DNAJB1
-1.56914	-0.441232	0.504431	1.25191	0.621557	-0.367525			0.587873	0.258302	0.192496	0.0679626	1.31673	P25705;K7EK77;K7ENJ4;K7ERX7;K7EJP1;K7EQH4;K7ESA0	ATP5A1
0.480316	1.02248	1.15901	-0.818573	-0.845082	-0.99815	+	oe_kk47	2.93224	0.00116885	0.00148012	-0.715658	-8.2659	P25786;F5GX11;B4DEV8;F5H112	PSMA1
0.595639	1.05861	1.03856	-0.773774	-1.01359	-0.905456	+	oe_kk47	3.37975	0.000417109	0.00050989	-0.694559	-10.7986	P25788;G3V4X5;G3V3W4;G3V5N4;H0YJ03	PSMA3
0.0537081	1.23216	1.18682	-0.721517	-0.784864	-0.966309	+	oe_kk47	1.86375	0.0136852	0.00953425	-0.574757	-4.20096	P25789;H0YN18;H0YMZ1;H0YL69;H0YMA1;H0YKT8;H0YMI6;H0YKS0;H0YLC2;H0YMV3;H0YLS6	PSMA4
0.848265	0.929092	0.940458	-0.860691	-0.744808	-1.11231	+	oe_kk47	4.06403	8.62919e-05	0.000482143	-5.60553	-16.1356	P25815	S100P
-0.069528	-1.15506	-1.25569	0.868565	0.930428	0.681283	+	oe_kk47	1.88847	0.012928	0.00914087	3.02132	4.27217	P25942;A0A087X1D0;H0YE23	CD40
-0.863498	-0.870625	-1.00027	0.866158	0.949492	0.91874	+	oe_kk47	5.44807	3.56394e-06	0	2.24765	35.9747	P26006;D6R9X8;H0YA49;K7EMU3	ITGA3
0.810406	1.03481	0.822903	-0.58956	-0.830182	-1.24838	+	oe_kk47	3.00645	0.000985258	0.00140193	-0.509027	-8.64374	P26038;V9GZ54	MSN
-0.708459	0.261386	-1.64677	0.307623	1.01144	0.774777	+	oe_kk47	1.11565	0.0766214	0.0425666	0.263496	2.37239	P26196;Q8IV96	DDX6
1.13484	0.928346	-0.283867	-1.20252	-1.0491	0.472297			0.788991	0.162558	0.10849	-0.113248	-1.70938	P26368;K7ENG2;K7ELP8	U2AF2
-0.210703	-0.574123	-1.27977	1.60174	-0.165744	0.628599	+	oe_kk47	1.0788	0.0834065	0.0465932	0.202389	2.2949	P26373;J3QSB4;J3KS98;H3BTH3;H3BUK8	RPL13
0.860003	0.935565	0.932567	-0.875434	-1.05441	-0.798295	+	oe_kk47	4.65898	2.19291e-05	0.00100935	-6.33788	-22.7979	P26447	S100A4
-0.628917	-0.622025	-1.35584	0.942063	0.602041	1.06268	+	oe_kk47	2.466	0.00341979	0.00265145	0.782064	6.21078	P26583;D6R9A6	HMGB2
-0.366053	1.19832	0.932459	0.379794	-0.830589	-1.31393			0.776752	0.167205	0.112108	-0.103427	-1.68534	P26599;A0A7I2V621;A0A0U1RRM4;A6NLN1;A0A7I2V4H6;A0A6Q8PEX4;A0A0D9SF20;K7EKJ7;K7EK45;K7ES59;A0A087WU68;A0A087WUW5;K7ELW5	PTBP1
0.74309	0.935553	1.04536	-0.928788	-0.844082	-0.951134	+	oe_kk47	4.37053	4.26059e-05	0.000724832	-1.57233	-19.2856	P26639;D6R9F8;D6RCA5;D6RDJ6;A2RTX5;D6RBR8;B7ZLP8;D6RJ97;D6RHV7;D6RCS6	TARS
-1.19121	-0.676208	-0.788492	0.591845	1.13586	0.928204	+	oe_kk47	2.86836	0.00135407	0.00168034	0.205336	7.95275	P26640;A0A140T936;A0A140T954;A2ABF4;H0Y426;A0A0G2JJT9;A0A140T904	VARS
0.0339762	1.54548	0.75114	-0.834612	-1.08753	-0.408456	+	oe_kk47	1.49973	0.0316424	0.0181278	-0.179171	-3.24106	P26641	EEF1G
0.797695	1.01319	0.840752	-0.76174	-1.30838	-0.58151	+	oe_kk47	2.82477	0.00149703	0.00191542	-3.67443	-7.7452	P27105;F8VSL7	STOM
1.47621	0.753831	-0.391379	0.11807	-1.27079	-0.685946			0.840918	0.144239	0.0926641	-0.239682	-1.81184	P27144;F8VS11	AK4
0.835989	1.01569	0.820768	-0.892378	-0.562034	-1.21804	+	oe_kk47	3.06123	0.0008685	0.00146064	-1.13285	-8.93276	P27338	MAOB
1.04156	1.28484	-1.16768	-0.236358	-0.00312713	-0.919238			0.394465	0.403213	0.36645	-0.0762501	-0.933926	P27348;E9PG15	YWHAQ
-1.11047	-0.698887	1.54476	0.608586	0.308932	-0.652928			0.0677653	0.855529	0.9059	0.0273126	0.194138	P27361;E9PQW4;E9PJF0;E9PBK7;B3KR49;H0YDH9;H0YEX6;E9PRH7	MAPK3
1.21497	-1.54566	-0.512459	0.307311	-0.295175	0.831018			0.25745	0.552777	0.609586	0.0334244	0.647188	X1WI28;P27635;F8W7C6;H7C123;H7C2C5;B8A6G2;A6QRI9;Q96L21;H7C2U2	RPL10
-1.4972	-0.993189	0.250681	0.719306	0.894207	0.626196	+	oe_kk47	1.33014	0.0467584	0.0265231	0.264943	2.84231	P27694;I3L4R8;I3L2M5;I3L524	RPA1
0.915251	0.743587	1.05217	-0.971669	-1.0206	-0.718736	+	oe_kk47	3.81831	0.000151946	0.000773333	-0.509097	-13.978	P27695;G3V3M6;G3V5Q1;G3V3C7;A0A0C4DGK8;G3V5M0;G3V359;H7C4A8;G3V5D9;G3V3Y6	APEX1
0.482721	1.26624	0.896518	-0.830643	-0.799963	-1.01487	+	oe_kk47	2.7657	0.00171514	0.00181865	-0.360073	-7.47176	P27708;F8VPD4;H7BZB3;H7C3Z5;H7C2E4	CAD
1.22245	0.800323	0.640388	-1.1165	-0.851912	-0.694755	+	oe_kk47	2.94765	0.00112811	0.00149845	-0.619391	-8.3431	P27797;K7EL50;A0A7P0T861;K7EJB9	CALR
0.846574	0.811506	1.05588	-0.933433	-1.05374	-0.726783	+	oe_kk47	3.91655	0.000121185	0.0004	-1.16909	-14.8048	X5D2R7;P28062;Q5JNW7;A0A140T998	PSM8;PSMB8
0.908972	0.997129	0.817187	-1.00405	-0.746256	-0.972986	+	oe_kk47	4.32901	4.68803e-05	0.000683544	-0.837967	-18.826	P28066	PSMA5
1.21059	1.07586	0.275085	-0.805722	-1.11316	-0.642659	+	oe_kk47	2.21212	0.00613592	0.00434109	-0.563732	-5.28821	P28070	PSMB4
1.37603	0.755434	0.146455	-0.040838	-1.19086	-1.04623	+	oe_kk47	1.39721	0.0400673	0.0225936	-0.431959	-2.99684	P28072;A0A087X2I4;I3L3X7	PSMB6
0.651782	0.776923	1.21729	-0.860488	-0.614095	-1.17141	+	oe_kk47	2.77054	0.00169613	0.0018329	-0.524444	-7.49383	P28074;H0YJM8	PSMB5
-0.79955	-1.03905	-0.872444	0.734635	0.871641	1.10476	+	oe_kk47	3.81943	0.000151555	0.000778523	0.639806	13.9872	P28331;B4DJ81;C9JPQ5;F8WDL5	NDUFS1
-1.83726	-0.197011	-0.133666	0.713598	0.749834	0.704504	+	oe_kk47	1.21746	0.0606094	0.0332586	0.347063	2.59116	P28482;K7ELV1;K7EN18;P31152;Q16659	MAPK1
1.52346	0.0954431	-1.30341	-0.891653	0.217201	0.358962			0.0819888	0.827964	0.886858	-0.0970707	-0.231945	P28799;K7EKL3;K7EQ05;K7EQI0;K7EMR1;K7EPL0	GRN
0.634376	0.619452	1.30929	-0.57154	-0.687785	-1.3038	+	oe_kk47	2.21984	0.00602782	0.00436364	-0.176886	-5.31452	P28838;H0Y9Q1;H0Y983	LAP3
0.88147	0.542358	0.927578	0.117337	-1.17378	-1.29497	+	oe_kk47	1.54405	0.0285726	0.0167304	-3.59084	-3.34986	P29034;R4GN49;Q5RHS7	S100A2
-0.40149	0.32575	-0.747478	1.77289	0.0636325	-1.0133			0.249734	0.562686	0.623982	0.123336	0.630345	P29084;E5RH41;E5RIW4	GTF2E2
1.5151	0.606038	0.372969	-1.01627	-0.547529	-0.930309	+	oe_kk47	1.93553	0.0116003	0.00829971	-0.422233	-4.41002	P29144;Q5VZU9;A0A494C1B8;A0A494C0U1;A0A494C1S4;A0A494C0A3;A0A494C1L2;A0A494C1S6;A0A494C0X4;A0A494C159	TPP2
-0.797684	-0.784139	-1.11545	1.08014	0.685417	0.931721	+	oe_kk47	3.46845	0.000340056	0.000548463	1.94149	11.38	P29218;H0YBL1;E5RIP7;E5RG13;E5RHE9;E5RI82;E5RGY4;E5RG94;E5RIF4	IMPA1
-0.81743	-0.818897	-1.0766	0.724229	0.985228	1.00347	+	oe_kk47	3.88106	0.000131504	0.000384342	2.30724	14.5008	P29279	CTGF
-0.910852	-1.17843	-0.603431	0.908321	0.877464	0.906932	+	oe_kk47	3.37785	0.000418938	0.000507659	3.79078	10.7864	P29317;J3KR66;A0A7P0TBL4;A0A7P0TA58;Q96L35;B1AKC9;E9PG71;A0A3B3IRY8;A0A0B4J1T8;P54762;P54764;P54760;Q15375;P54753;Q9UF33;P29323	EPHA2
-0.00771373	-1.39757	-0.997223	0.885239	0.516151	1.00112	+	oe_kk47	1.66415	0.0216696	0.0134005	0.37571	3.65532	P29353;X6R6D0;Q5T182;Q5T181;H0Y539;Q5T188;Q5T187;P98077;Q6S5L8	SHC1
0.841783	0.968996	0.901479	-1.14489	-0.765069	-0.8023	+	oe_kk47	3.85863	0.000138475	0.000373702	-0.733014	-14.3118	P29401;A0A0B4J1R6;E9PFF2;F8W888;F8WAX4	TKT
1.87598	0.141625	-0.102416	-0.281342	-0.95164	-0.682202			0.913584	0.122016	0.0739976	-0.19983	-1.9567	P29590;H3BT57;H3BT29;H3BVD2;H3BUJ5	PML
0.284784	1.5337	0.379191	-0.930335	-1.24778	-0.0195596	+	oe_kk47	1.26226	0.0546689	0.0306564	-0.111534	-2.68981	P29692;E9PK01;E9PRY8;A0A087X1X7;E9PQZ1;E9PQ49;E9PI39;E9PPR1;E9PL12;E9PMW7;E9PIZ1;H0YCK7;H0YE58;E9PQC9	EEF1D
-0.0612099	-1.40142	-0.96517	0.76465	0.573683	1.08946	+	oe_kk47	1.73071	0.0185905	0.0117454	0.843957	3.83174	P29966	MARCKS
-0.257939	-0.493143	-1.06601	0.184724	-0.229638	1.862			0.821624	0.150791	0.0976814	0.325022	1.77368	P29992;K7EL62;A0A087WVZ3;O95837	GNA11
-1.88332	-0.184896	0.0355848	0.521952	0.709946	0.800737			1.04041	0.091115	0.0509811	0.39516	2.21502	P30038;Q5TF55	ALDH4A1
1.00843	0.896675	0.826922	-0.925525	-0.962159	-0.844338	+	oe_kk47	5.06143	8.681e-06	0	-0.962597	-28.7756	P30040;F8VY02;F8W1G0	ERP29
0.982481	1.10708	0.605458	-0.783889	-0.985816	-0.925315	+	oe_kk47	3.42245	0.000378051	0.000535797	-0.469619	-11.0749	P30041	PRDX6
0.826984	0.964702	0.906485	-0.886996	-0.644062	-1.16711	+	oe_kk47	3.48747	0.000325484	0.000560386	-1.01075	-11.5084	P30043;M0R192;A0A2R8YEP4;A0A2R8Y7Y9;M0QZL1	BLVRB
1.36624	0.160221	0.897245	-0.508733	-1.28175	-0.633221	+	oe_kk47	1.71958	0.019073	0.01199	-0.469458	-3.80187	P30044	PRDX5
-1.47963	-0.52551	-0.483368	0.704685	0.56536	1.21847	+	oe_kk47	1.91617	0.0121291	0.00857794	0.223234	4.35293	P30046;J3KQ18;B5MC82;A6NHG4;H7C342	DDT;DDTL
0.883133	1.05374	0.784157	-0.798469	-0.893761	-1.0288	+	oe_kk47	4.2099	6.16737e-05	0.000568421	-0.84912	-17.5664	P30048	PRDX3
-1.4906	0.99506	1.0423	-0.636011	-0.338192	0.427445			0.152114	0.704508	0.789533	-0.161652	-0.407499	P30049;A0A087WTL3	ATP5D
0.550532	0.921075	1.04627	-1.48934	-0.456066	-0.57247	+	oe_kk47	2.02305	0.00948309	0.00709932	-0.253839	-4.67499	P30050	RPL12
0.773341	0.904567	1.04812	-0.881122	-0.863654	-0.981256	+	oe_kk47	4.50023	3.1606e-05	0.000824427	-1.26445	-20.7936	P30084	ECHS1
-0.284771	0.680108	1.62939	-1.11408	-0.185458	-0.725188			1.03119	0.0930701	0.0521281	-0.233029	-2.19596	P30085;Q5T0D2;A0A494BXC7	CMPK1
0.339855	1.26633	0.949151	-1.07326	-0.486243	-0.995839	+	oe_kk47	2.18257	0.00656795	0.00491371	-0.668926	-5.18847	P30086	PEBP1
-0.574366	0.185271	-1.0196	1.58004	0.650864	-0.822209			0.528012	0.296475	0.23096	0.0463708	1.19965	P30101	PDIA3
0.286698	-1.27713	-1.25502	0.845777	0.608265	0.791413	+	oe_kk47	1.33988	0.0457215	0.0259293	0.183195	2.8645	P30153;B3KQV6;C9J9C1;E9PH38;E9PPI5;E9PHZ6;E9PNM7;M0QXG4;M0R0K6	PPP2R1A
0.411865	0.591535	0.681726	0.108875	0.197218	-1.99122			0.713308	0.193505	0.132075	-0.880113	-1.56118	P30154;H0YDG7	PPP2R1B
1.00491	0.805498	0.922572	-0.923208	-0.893852	-0.915919	+	oe_kk47	5.19765	6.34381e-06	0	-1.3487	-31.1319	P30405;R4GN99;H0Y548	PPIF
-0.858907	0.893201	1.36073	-1.02888	-0.676663	0.310521			0.519989	0.302003	0.236883	-0.112022	-1.18389	P30519;A0A087WT44;I3L159;I3L1F5;I3L4P8;A0A1B0GXH0;I3L463;I3L276;I3L1Y2	HMOX2
0.0115857	0.628434	1.6773	-0.79017	-0.78754	-0.739608	+	oe_kk47	1.47266	0.0336775	0.0190308	-0.31143	-3.17557	P30520	ADSS
1.0439	0.76047	0.850218	-0.716987	-1.29885	-0.638758	+	oe_kk47	2.85465	0.00139749	0.00165922	-1.65501	-7.88692	P30533;A0A3B3IRQ7;D6REW6	LRPAP1
1.23988	0.685752	0.736164	-1.06716	-0.939165	-0.655472	+	oe_kk47	2.93214	0.00116912	0.00147786	-0.948142	-8.26541	P30622;J3KP58;F5H0N7;A0A3B3ITA2;F5H6A0;F5H1T5;F5H367;A0A3B3IS27;F5H270	CLIP1
0.86836	0.976226	0.876015	-1.04416	-0.71568	-0.960764	+	oe_kk47	4.18884	6.47381e-05	0.000548223	-5.07859	-17.3523	P30740;C9J7N5;O75830	SERPINB1
-0.499182	-1.19888	-0.924481	0.980497	0.547793	1.09425	+	oe_kk47	2.57571	0.00265638	0.00219865	0.706608	6.64911	P30837;A0A0U1RQK9	ALDH1B1
0.944595	1.07031	0.700831	-0.976652	-0.919254	-0.819834	+	oe_kk47	3.98154	0.000104342	0.000421875	-0.670465	-15.3775	P31040;D6RFM5;A0A087X1I3;A0A494C1T6;H0Y8X1	SDHA
-0.999492	-1.30734	-0.27131	0.851141	0.827697	0.899303	+	oe_kk47	2.29674	0.00504964	0.00381091	1.96254	5.58232	P31146;H3BTU6;H3BRJ0;H3BRY3;H3BNA2;H3BU76;H3BSL1	CORO1A
-0.976507	-0.90073	-0.853049	0.934619	1.00201	0.793659	+	oe_kk47	4.85845	1.38532e-05	0	1.37359	25.5887	P31150;G5E9U5	GDI1
-1.33415	1.60743	-0.128812	0.542781	-0.554395	-0.132855			0.0357664	0.920945	0.947344	-0.00595284	-0.105652	P31153;Q00266	MAT2A
0.957194	0.895915	0.882716	-0.882225	-0.873458	-0.980142	+	oe_kk47	5.80861	1.55378e-06	0	-10.5573	-44.2917	P31327;A0A669KBF2;Q5R211	CPS1
-0.819524	-1.0687	-0.833716	0.957608	0.787966	0.976363	+	oe_kk47	4.25563	5.55098e-05	0.000613636	1.60723	18.0399	P31350;A0A286YFD6;A0A7P0SBL1;A0A2R8Y837	RRM2
-1.33031	-0.423237	-0.827861	0.682033	1.16972	0.729651	+	oe_kk47	2.31441	0.00484831	0.00376492	0.821873	5.64535	P31689	DNAJA1
-1.01484	-0.999548	-0.474781	1.06905	0.164927	1.2552	+	oe_kk47	1.91842	0.0120665	0.00860243	0.411622	4.35955	P31749;A0A804HJM6;A0A087WY56;G3V3X1;G3V2I6;A0A5F9ZGY0;A0A5F9ZHU3;A0A7P0T8T9;A0A5K1VW74;Q9Y243;M0QZW8	AKT1
-0.744571	-0.629644	-1.27424	0.764068	0.760218	1.12417	+	oe_kk47	2.79373	0.00160794	0.00186951	0.399747	7.60043	P31930	UQCRC1
-0.591005	0.989039	1.52805	-0.500221	-0.901125	-0.524733			0.924514	0.118983	0.0718105	-0.331311	-1.97866	P31937;H7BZL2	HIBADH
-0.983135	-0.693026	-1.02934	1.08871	0.833979	0.782814	+	oe_kk47	3.66086	0.000218343	0.00067052	0.269957	12.7452	P31939;H7C1S2;C9JLK0;F8WEF0	ATIC
0.873781	0.949376	0.900347	-0.755759	-0.89064	-1.07711	+	oe_kk47	4.34132	4.55701e-05	0.000696774	-0.875093	-18.9612	P31942	HNRNPH3
-0.366562	-1.29635	-0.907224	1.15061	0.833515	0.586011	+	oe_kk47	2.25488	0.00556058	0.00398931	0.435013	5.43523	P31946;Q4VY20;Q4VY19;A0A0J9YWE8;A0A0J9YWZ2	YWHAB
1.34448	0.665239	-1.08073	-0.0643876	0.343572	-1.20817			0.291844	0.510688	0.539012	-0.0436274	-0.7212	P31947	SFN
1.1439	0.878114	-0.841365	0.666518	-0.747153	-1.10001			0.405172	0.393394	0.351999	-0.0424989	-0.955587	P31948;F5H783;H0YGI8;F5GXD8	STIP1
-1.7623	0.169829	-0.147769	0.57855	1.22665	-0.0649593			0.756653	0.175125	0.118443	0.111778	1.64593	P31949	S100A11
0.825567	0.944242	0.879537	-1.15288	-0.428528	-1.06793	+	oe_kk47	2.80233	0.00157641	0.00188456	-3.20292	-7.64031	P32004;E7EVM4;E7EPI4;H0Y5C3;E9PHJ4;E7EMY4;H3BLW5	L1CAM
0.993313	0.900732	0.836028	-0.818607	-1.01096	-0.900509	+	oe_kk47	4.83654	1.457e-05	0	-1.25318	-25.2663	P32119;A6NIW5	PRDX2
0.597136	1.04755	1.05152	-1.00325	-0.826432	-0.866529	+	oe_kk47	3.4464	0.000357767	0.000545882	-4.35323	-11.2328	P32320	CDA
0.0548863	-1.56304	-0.811721	0.79869	0.984326	0.536855	+	oe_kk47	1.4778	0.0332813	0.0187959	1.10554	3.18794	P32321;D6RBJ9;D6R9S0;D6RBN2;D6RAD7;D6RAR9;D6RC36	DCTD
0.739314	1.19724	0.501089	-0.44458	-0.455629	-1.53743	+	oe_kk47	1.75813	0.017453	0.0109371	-0.353192	-3.90597	P32322;E2QRB3;J3KQ22;J3QKT4;J3QL24;J3QLK9;J3QL23;J3QL32;J3QRZ0;J3QR88;J3KTA8;J3QKT3;J3KSA9	PYCR1
0.632594	-0.7501	0.633838	0.362813	0.808895	-1.68804			0.142339	0.720545	0.803846	-0.0548884	-0.383961	P32780;E9PM51;F5H0Y9;E9PL58;E9PI26	GTF2H1
0.754438	0.897101	0.993708	-0.560603	-0.767159	-1.31749	+	oe_kk47	2.76356	0.00172361	0.00180231	-1.95579	-7.46203	P32929	CTH
-1.37277	0.816443	1.41461	-0.121703	-0.0839153	-0.652666			0.263373	0.545289	0.597747	-0.137217	-0.660055	P32969;A0A2R8Y5Y7;D6RAN4;H0Y9V9;H0Y9R4	RPL9
-1.11625	-1.1828	-0.284336	1.0427	0.774609	0.766078	+	oe_kk47	2.32533	0.00472792	0.00366759	1.78353	5.68461	P32970;M0QZW2	CD70
-0.770584	-1.10064	-0.839812	1.01126	0.744438	0.95534	+	oe_kk47	3.81936	0.000151579	0.00077592	1.45462	13.9866	P33121;E7EPM6;B7Z3Z9;D6RER0;H0Y9U7;H0Y9Z9	ACSL1
-0.694747	0.895921	1.14399	-0.564365	-1.33449	0.553691			0.491503	0.322476	0.261033	-0.0647939	-1.12779	P33176	KIF5B
-1.23596	-0.998059	-0.0681259	1.4513	0.384225	0.466614	+	oe_kk47	1.44277	0.036077	0.0204576	0.293767	3.10412	P33316;H0YNW5;A0A0C4DGL3;H0YKC5;H0YKI0;H0YMM5;H0YMP1	DUT
0.958485	0.356466	1.01899	0.0153929	-0.895386	-1.45394	+	oe_kk47	1.50669	0.0311394	0.01801	-1.80415	-3.25801	P33897	ABCD1
-0.346815	-1.80002	-0.0509387	0.854941	0.62388	0.718955	+	oe_kk47	1.26241	0.05465	0.0306712	0.722766	2.69014	P33981;D6RFY1;D6RF82;D6REX1;D6RIC6	TTK
0.372588	-1.43357	-0.214228	1.59753	0.11821	-0.440533			0.453434	0.352019	0.296585	0.0549857	1.05233	P33991;A0A3B3IU45;A0A3B3IT92;A0A3B3IS57;E5RG31;A0A3B3ITP6;A0A3B3IRR8;E5RFR3;E5RG53	MCM4
-0.417023	-0.372481	1.02038	1.34458	-0.241248	-1.3342			0.0585652	0.873846	0.916702	-0.00846926	-0.169207	P33992;B1AHB1;B1AHB2;B1AHA9	MCM5
-1.29671	1.68255	-0.673007	0.0756984	0.048456	0.163009			0.0740228	0.84329	0.897577	0.0194219	0.210877	P33993;C9J8M6	MCM7
-1.23605	-0.87952	1.5905	0.392319	0.122095	0.010664			0.145131	0.715927	0.800004	0.255981	0.390711	P34059	GALNS
-1.02585	-0.964086	-0.717355	1.00712	0.998383	0.701787	+	oe_kk47	3.70897	0.000195447	0.00070303	0.885452	13.1104	P34896;J3KRZ5;J3KRK5;A0A087WTD8	SHMT1
0.565795	1.10195	0.971604	-0.738077	-0.659604	-1.24167	+	oe_kk47	2.71065	0.00194693	0.00185839	-0.447605	-7.22469	P34897;H0YIZ0;G3V2Y4;G3V5L0;G3V4W5;G3V540;G3V2W0;G3V241;G3V3Y8;G3V4T0;G3V4X0;G3V2E4;G3V2D2;G3V2Y1;G3V3C6	SHMT2
-0.312215	-0.825926	-1.42473	0.85806	0.829565	0.875249	+	oe_kk47	2.21862	0.00604477	0.00435609	0.24211	5.31036	P34932;A0A087WYC1;A0A087WTS8	HSPA4
0.709542	0.859764	1.12984	-0.962675	-1.02054	-0.715931	+	oe_kk47	3.50868	0.00030997	0.000574257	-0.843907	-11.6534	P34949;H3BPB8;F5GX71;H3BPP3;H3BUZ9;H3BP57;H3BMZ9;H3BT48;H3BPM5;H3BNY8;H3BPU7;H3BT46;H3BQX0;H3BN01;H3BU66;H3BUG1;B4DYB8	MPI
0.889571	0.741668	0.947604	-0.277717	-1.01654	-1.28458	+	oe_kk47	2.30051	0.00500599	0.00381785	-2.09071	-5.59571	P35052;H7C410;H7C024;H7BZE9;H7BZL4;C9J4Y6	GPC1
-0.625501	-0.931956	-1.01208	0.273225	1.19667	1.09964	+	oe_kk47	2.25186	0.00559938	0.00406039	0.467303	5.42473	P35221;G3XAM7;E5RIB1;E5RG03;E5RGY6;E5RHV7;E5RJL0;E5RIE0;A0A0A0MRI5;E5RJ41;E5RGY7;H0YBB8;E5RFM3;A0A0A0MTJ6;E5RGD2;E5RJP7;E5RFM5;E5RIT8;E5RFK9;E5RFG3;A0A804HI07;Q9UI47;E5RJZ2	CTNNA1
-1.53624	0.732481	1.11654	0.152626	0.369453	-0.834853			0.0812193	0.829432	0.887223	-0.0391865	-0.229922	P35232;C9JW96;E7ESE2;E9PCW0;C9JZ20	PHB
0.0255607	-1.65263	-0.653545	0.717852	0.552687	1.01008	+	oe_kk47	1.40216	0.0396132	0.0225239	1.48467	3.00838	P35240;A0A5F9ZHA0;A0A5K1VW66	NF2
0.520144	1.36589	0.730233	-1.00286	-0.698852	-0.914558	+	oe_kk47	2.53034	0.0029489	0.0022198	-0.180044	-6.46474	P35241;A0A2R8Y5S7;A0A2R8Y7M3;E9PNV3;A0A2R8Y5P0;E9PQ82;A0A2R8Y4H6;E9PKN5	RDX
-1.69488	-0.512665	0.471353	1.11435	0.632847	-0.0110126			0.753377	0.176451	0.11917	0.128433	1.63951	P35244;B5MC59	RPA3
-1.44809	-0.274384	-0.804458	0.972779	0.892424	0.661727	+	oe_kk47	2.05893	0.00873112	0.00640125	0.815294	4.78695	P35249;C9JZI1;C9J8M3;C9JXZ7;C9JGY5;F8WE44;H7C1P0;C9JW34	RFC4
-0.445237	-0.668086	-1.34177	0.840803	0.28506	1.32923	+	oe_kk47	1.80907	0.0155214	0.0103656	0.450098	4.04642	P35250;A0A087WVY3;H7C5P4;H7C596;H7C5P1;H7C5Q7;F8WC37;H7C5A0;H7C5G4	RFC2
-1.06932	-0.382292	-1.1823	0.885809	0.874489	0.87361	+	oe_kk47	2.66461	0.00216466	0.00204082	0.673967	7.02358	P35251;H0Y8U4;A0A1W2PP02	RFC1
-1.09277	1.433	0.927664	-0.0197768	-0.861233	-0.38689			0.449576	0.35516	0.300525	-0.112553	-1.04464	P35268;K7ERI7;K7EJT5;K7EP65;K7EKS7;K7ELC4;K7EMH1	RPL22
1.48235	0.0175697	0.290187	-0.941817	0.433548	-1.28184			0.798171	0.159158	0.105745	-0.171876	-1.72744	P35269;M0R0R9;M0QXD6;M0R0Z3	GTF2F1
0.279389	1.21488	1.07487	-0.611233	-0.965105	-0.992795	+	oe_kk47	2.24979	0.00562613	0.00405319	-0.685219	-5.41755	P35270	SPR
0.749153	1.17928	0.674223	-1.14594	-0.397228	-1.05949	+	oe_kk47	2.43943	0.00363555	0.00258704	-2.91349	-6.1084	P35354;Q6ZYK7;A0A7P0T828;A0A2R8YDM0;A0A087X296;P23219	PTGS2
0.885866	0.169414	1.39773	-1.08501	-0.928871	-0.439124	+	oe_kk47	1.80281	0.0157467	0.0103953	-0.443513	-4.029	P35520;C9JMA6;H7C2H4;H7C1W6;H7C2W0	CBS
-0.797961	1.12287	-1.34341	-0.408478	0.950836	0.476146			0.329882	0.467862	0.468694	0.0679563	0.801286	P35573;A0A1C7CYW1	AGL
-0.85492	-0.923799	-0.956583	0.952391	0.937402	0.845509	+	oe_kk47	5.65926	2.19149e-06	0	1.25276	40.6364	P35579;Q5BKV1;B1AH99;A0A2R8Y4C3;REV__S4R3H4;REV__E7EQT4;REV__Q9UKV3	MYH9
-0.948746	-1.05974	-0.712866	0.912763	0.908334	0.900252	+	oe_kk47	4.22561	5.94826e-05	0.00057754	6.15285	17.7277	P35580;E7ERA5	MYH10
-1.45338	0.47365	0.00585289	1.56699	-0.422949	-0.170165			0.310629	0.48907	0.501298	0.106354	0.760961	P35610;B1APM4	SOAT1
0.898032	0.77293	1.02503	-1.00232	-1.07764	-0.616039	+	oe_kk47	3.44193	0.000361468	0.000542056	-0.77374	-11.2031	P35637;H3BPE7	FUS
1.32449	0.764613	0.541493	-0.911844	-1.03168	-0.687073	+	oe_kk47	2.63772	0.00230293	0.00200236	-1.51564	-6.90841	P35754	GLRX
0.21064	0.754328	-1.84302	-0.259328	0.940061	0.197317			0.271199	0.535551	0.58146	0.0826314	0.676977	P35914;H0Y2L7	HMGCL
-1.62127	-0.663817	-0.00821779	0.887379	0.981354	0.424573	+	oe_kk47	1.42585	0.0375103	0.0210871	0.70846	3.06405	P36404;V9GYD0	ARL2;ARL2-SNX15
1.79795	-0.386135	0.503347	-0.902702	-0.369291	-0.64317			0.913562	0.122022	0.0739678	-0.213535	-1.95665	P36405	ARL3
0.700373	0.380094	1.09124	0.252554	-0.91897	-1.50529	+	oe_kk47	1.223	0.0598412	0.0330591	-0.303256	-2.60329	P36507;G5E9C7;A0A1B0GUL7;M0R1B6	MAP2K2
1.01625	-0.219323	-1.13572	1.38919	-0.253403	-0.796997			0.088638	0.815384	0.878116	0.0415503	0.249333	P36542	ATP5C1
0.220955	-1.82399	0.204228	1.23234	0.241399	-0.0749325			0.522198	0.300471	0.235002	0.0708192	1.18823	P36543;C9J8H1;Q96A05	ATP6V1E1
-0.827635	-0.956608	-0.924665	1.15968	0.77395	0.775274	+	oe_kk47	3.75489	0.000175837	0.000738854	0.749439	13.4683	P36551;H0YA22;D6RER6	CPOX
0.507859	0.537471	0.485825	0.417058	-2.00984	0.0616224			0.604261	0.248736	0.182457	-0.0614103	-1.34869	P36578;H3BM89;H3BTP7;H3BU31	RPL4
-0.333321	-1.11007	-1.09652	0.611026	1.29659	0.632293	+	oe_kk47	2.11319	0.00770566	0.00559871	0.327105	4.96008	P36639;C9J361	NUDT1
1.3153	0.685139	0.635063	-0.744988	-0.779039	-1.11147	+	oe_kk47	2.67781	0.00209986	0.00205811	-0.649744	-7.08074	P36871;A0A3B3ITK7	PGM1
-1.98163	0.548279	0.719497	0.455748	0.212263	0.0458407			0.209108	0.617863	0.700644	0.0452429	0.539992	P36915;A0A140T8Y2;A2AB27	GNL1
0.846791	1.02669	0.846599	-1.07384	-0.867472	-0.778773	+	oe_kk47	4.16413	6.85283e-05	0.00053202	-2.19729	-17.1046	P36952;C9JLM5	SERPINB5
-2.00063	0.384658	0.262879	0.364839	0.776077	0.212174			0.495954	0.319188	0.257536	0.938099	1.13657	P36954;K7EKS1;K7EK49	POLR2I
0.0572901	1.61509	0.567761	-0.480595	-0.501022	-1.25852	+	oe_kk47	1.33086	0.046681	0.0265365	-0.171237	-2.84395	P36957;Q86SW4;H0YJF9;G3V5M3;G3V3F0	DLST
1.08263	-0.721309	0.536055	0.822767	-1.51729	-0.20285			0.27895	0.526078	0.564721	-0.0701688	-0.693647	P37108;H0YLA2;H0YLW0	SRP14
-0.111312	-1.16099	-1.09452	0.198877	0.922445	1.2455	+	oe_kk47	1.57849	0.0263943	0.0152813	0.373493	3.43583	P37198;M0QXN5;M0QX10;M0QYY0;M0QX13;M0QZL5;M0R1S1;M0QX64;M0R302	NUP62
-0.0591633	1.18002	1.14453	-0.15381	-1.19911	-0.912459	+	oe_kk47	1.37459	0.0422095	0.0241661	-0.306755	-2.94427	P37235;E9PC71;P61601;E5RK89;E5RIA5;E5RIZ1;E5RIG4;E5RHC8;E5RI78;E5RHE8;C9JW46;E5RI95;H7BZC1;E5RGZ0;E5RJJ6;E5RJT1;E5RFL9;E5RGA9;A0A1B0GXG3	HPCAL1
0.694846	0.99827	1.02414	-0.98982	-0.860576	-0.86686	+	oe_kk47	4.04105	9.09809e-05	0.000463519	-0.351923	-15.9209	P37802;X6RJP6;C9J5W6;Q9UI15	TAGLN2
0.942579	0.984884	0.800639	-0.965705	-0.967561	-0.794837	+	oe_kk47	4.65628	2.20658e-05	0.001	-0.973824	-22.7623	P37837;F2Z393;E9PM01;E9PKI8	TALDO1
0.869477	0.827946	1.02504	-0.760367	-0.932309	-1.02978	+	oe_kk47	4.28335	5.20775e-05	0.000642857	-0.9959	-18.333	P38117;M0QY67	ETFB
1.26886	0.868469	-0.354724	0.167735	-0.436703	-1.51363			0.79177	0.161521	0.108117	-0.185723	-1.71485	P38159;H3BT71;H0Y6E7;H3BUY5;H3BR27;H3BNC1;O75526;Q8N7X1	RBMX
0.525329	0.661403	1.16307	-1.56761	-0.683117	-0.0990763	+	oe_kk47	1.54054	0.0288045	0.0170542	-0.518609	-3.34117	P38432	COIL
0.368944	1.01686	1.21905	-0.946138	-0.638381	-1.02034	+	oe_kk47	2.45346	0.00351998	0.00262154	-0.580994	-6.16229	P38606;C9JVW8;C9JA17	ATP6V1A
0.262378	-1.0479	-1.46144	0.712899	0.688391	0.845669	+	oe_kk47	1.34245	0.0454517	0.0257189	0.206587	2.87037	P38646;A0A7I2V2G2;D6RCD7;A0A7I2YQB2;A0A7I2V3F7;A0A7I2V2S7;H0Y8K0;A0A3B3ITI4;H0Y8S0	HSPA9
0.99817	1.05773	0.614447	-0.698156	-0.792306	-1.17989	+	oe_kk47	3.03424	0.000924187	0.00142951	-0.415978	-8.78929	P38919;I3L3H2;E9PBH4;F8WE11	EIF4A3
1.00232	-0.223529	-1.47125	1.26849	-0.234041	-0.341987			0.201483	0.628806	0.712684	0.0932261	0.522687	P39019;A0A075B6E2;M0R2L9;M0QYF7;M0R140	RPS19
-0.226902	0.850082	1.34968	-0.142537	-0.319804	-1.51052			0.97328	0.106346	0.0627983	-0.121054	-2.07731	P39023;G5E9G0;H7C422;H7C3M2;B5MCW2;F8WCR1;Q92901	RPL3
1.78874	0.238815	-0.614369	-0.730757	-0.888516	0.20609			0.530663	0.294671	0.228676	-0.193286	-1.20485	P39748;I3L3E9;F5H1Y3	FEN1
0.931179	0.912686	0.873953	-1.0974	-0.712864	-0.907556	+	oe_kk47	4.06417	8.62641e-05	0.000484305	-5.68428	-16.1369	P40121;E7ENU9;B8ZZL6;H7C0X8	CAPG
-0.413634	-1.70382	-0.175383	0.648989	0.574075	1.06977	+	oe_kk47	1.42496	0.0375872	0.021065	1.62929	3.06194	P40123;A0A087WZ15;A0A087X0J3;E9PDI2;B7Z385;F8WDB9;F8WEW0	CAP2
0.28561	-1.01848	-1.41354	0.321184	1.1515	0.673733	+	oe_kk47	1.18652	0.0650849	0.0355883	0.265074	2.52392	P40222	TXLNA
-1.39166	-0.56249	-0.611438	0.932132	1.10833	0.525132	+	oe_kk47	2.23201	0.00586125	0.00418515	0.424222	5.3562	P40227;Q92526;J3KRI6	CCT6A
0.898662	0.777729	0.98226	-1.24135	-0.511939	-0.905361	+	oe_kk47	2.89745	0.00126634	0.00160117	-3.08789	-8.09397	P40261	NNMT
1.37073	-0.491997	-1.20984	0.914314	-0.743982	0.160783			0.086438	0.819525	0.88044	0.0269127	0.243599	P40429;A0A7I2V2L9;M0QYS1;Q8J015;A0A7I2V5L3;Q6NVV1;M0QZU1;A0A096LPE0	RPL13A;RPL13a
-0.627781	0.381303	-0.114839	-0.299251	-1.10839	1.76896			0.0951509	0.803247	0.868895	0.0285511	0.266195	P40818;A0A075B720;H0YLH2;H0YM47;H0YNL5;H0YKV1	USP8
0.413674	-1.87118	-0.363391	0.372776	0.660749	0.787371			0.824994	0.149626	0.0967369	0.67824	1.78034	Q5QNY5;P40855;E9PS71;B7Z8B3;H0YJ60;H0YDY4	PEX19
0.404277	1.1037	1.07204	-1.1668	-0.473048	-0.940177	+	oe_kk47	2.30688	0.0049331	0.00374429	-0.274981	-5.61843	P40925;A0A5K1VW95;B9A041;B8ZZ51;C9JF79;C9JRL4;C9JLV6	MDH1
-0.844824	-0.992133	-0.894084	0.927621	0.812514	0.990907	+	oe_kk47	4.94109	1.14528e-05	0	0.574905	26.8416	P40926;G3XAL0	MDH2
-1.26546	-0.593312	-0.791503	0.71718	1.10321	0.829878	+	oe_kk47	2.81134	0.00154404	0.0018973	0.501169	7.68226	P40937;F5H5S0;C9JH72;F5H304;F5H0U6	RFC5
-0.405535	-1.38985	-0.60833	0.31499	1.40018	0.688544	+	oe_kk47	1.66721	0.0215174	0.0132831	0.813559	3.66331	P40938;A0A087X270	RFC3
1.68753	0.607497	-0.441388	-0.899244	-0.879874	-0.0745182			0.854604	0.139764	0.0884914	-0.185326	-1.83898	P41091;Q2VIR3;H7BZU1	EIF2S3;EIF2S3L
-1.83501	0.391187	0.0667765	0.316949	1.16757	-0.107473			0.509585	0.309325	0.245207	0.182889	1.16343	P41208;Q12798	CETN2
1.63484	0.261931	0.279558	-0.998339	-1.08398	-0.0940147	+	oe_kk47	1.22985	0.0589047	0.032537	-0.633447	-2.6183	P41214;Q5SY38;A0A087X1L6;A0A087WVB6	EIF2D
0.965208	0.755116	0.958645	-0.57521	-0.918827	-1.18493	+	oe_kk47	3.151	0.000706318	0.00139927	-2.76066	-9.42567	P41221;C9J8I8	WNT5A
-1.098	-0.682096	-0.933634	0.915336	0.863662	0.934731	+	oe_kk47	3.90843	0.000123472	0.000395604	0.850812	14.7347	P41223;C9JCD9;F8WCN7	BUD31
0.982634	1.21907	0.433862	-0.706858	-0.979353	-0.949357	+	oe_kk47	2.6784	0.00209701	0.00206061	-0.473939	-7.08327	P41227;F8W808;A8MWP7;C9JN83;C9JW55;Q9BSU3;H0Y8T0	NAA10
0.712515	-0.597151	-1.78405	0.431223	0.64393	0.593537			0.700859	0.199132	0.136979	1.33765	1.53689	P41236;E7EMN6;Q6NXS1;E7EUI7	PPP1R2;PPP1R2P3
-1.90952	-0.225517	0.447509	0.779564	0.250652	0.657313			0.715146	0.192688	0.131996	0.332635	1.56477	P41240;H3BUM9;H3BN15;H3BU69;K7ENL8;K7ES68;K7EQY5;P42679	CSK
0.84712	0.883531	0.985448	-0.686919	-1.01671	-1.01247	+	oe_kk47	3.99527	0.000101095	0.000428571	-0.59994	-15.5012	P41250;A0A6Q8PGZ8;A0A6Q8PGA8;A0A6Q8PGI6;A0A6Q8PHH9;A0A6Q8PGW4;A0A6Q8PHI7;H7C443;A0A6Q8PFZ6;A0A6Q8PF45;A0A6Q8PH49;A0A6Q8PGN7;F8WCK4;A0A6Q8PGZ9;A0A6Q8PFV5;A0A6Q8PFU7;A0A6Q8PGT3;A0A6Q8PFN0	GARS
0.83985	0.955295	0.934455	-0.907659	-0.798546	-1.0234	+	oe_kk47	4.78971	1.62289e-05	0	-1.11986	-24.5907	P41252;A0A804HL54;A0A804HJN6;A0A0A0MSX9;A0A804HHW9;J3KR24;A0A804HJ36;A0A804HIV9;A0A804HKU1;A0A804HK69;A0A804HIG2;A0A804HKW6;A0A0D9SFC1	IARS
-0.965659	-1.22672	-0.45582	0.961566	0.906148	0.78049	+	oe_kk47	2.79135	0.00161678	0.00186454	0.893651	7.58943	P41743	PRKCI
0.418437	1.20988	0.973464	-0.553676	-0.955051	-1.09306	+	oe_kk47	2.43392	0.00368197	0.00257661	-0.99386	-6.08736	P42025	ACTR1B
0.53078	1.02927	1.07952	-0.700444	-1.21736	-0.721759	+	oe_kk47	2.71254	0.00193847	0.00186301	-0.843838	-7.23302	P42126;Q96DC0;H3BS70	ECI1;DCI
-0.738122	-0.6678	-1.25058	0.657285	0.913592	1.08563	+	oe_kk47	2.87456	0.00133487	0.00155114	0.418149	7.98267	P42166	TMPO
-0.73746	-0.904329	-1.08046	0.90256	0.92829	0.891404	+	oe_kk47	4.27233	5.34158e-05	0.000627907	0.706828	18.2159	P42167;G5E972;H0YJH7	TMPO
-0.635517	1.52745	0.957884	-0.985097	-0.456553	-0.408172			0.851093	0.140899	0.089507	-0.142013	-1.83201	P42285;H0YAC4;H0Y8U3	SKIV2L2
1.08129	0.618271	0.897906	-1.04885	-0.360106	-1.18851	+	oe_kk47	2.40715	0.00391607	0.00259491	-0.569859	-5.98596	P42345;B1AKP8;B1AKQ2	MTOR
0.0364176	1.20364	1.22704	-0.766733	-0.776699	-0.923665	+	oe_kk47	1.84598	0.0142567	0.00966621	-0.535113	-4.15029	P42566;B1AUU8;S4R3U1	EPS15
-0.45937	-1.73005	-0.0441625	0.553678	1.03531	0.644595	+	oe_kk47	1.3199	0.047874	0.0270913	1.08602	2.81905	P42575;A0A087WYM1;C9JRR9	CASP2
1.33754	-1.13306	-0.945817	0.534702	-0.498906	0.705541			0.219056	0.603871	0.684096	0.0393696	0.562393	P42677;C9J1C5	RPS27
0.223034	-1.45278	-0.562389	1.07421	1.10454	-0.386609			0.799908	0.158523	0.10528	0.423548	1.73086	P42695;G3V1A9;E9PKK4;E9PQA3;E9PLE0	NCAPD3
0.489698	0.555191	1.18709	-1.5434	-0.804509	0.115931	+	oe_kk47	1.31723	0.0481693	0.0272392	-0.343253	-2.81301	P42696;A2A2V2;Q5TCT4;H7C5M1	RBM34
1.42503	0.741849	0.132085	-0.178072	-0.814797	-1.3061	+	oe_kk47	1.43665	0.036589	0.0205198	-0.359665	-3.08959	P42766;F2Z388	RPL35
0.976774	0.822291	0.869021	-0.489901	-1.05514	-1.12305	+	oe_kk47	3.006	0.000986279	0.00139968	-4.04069	-8.64143	P43121	MCAM
-0.0862717	1.31406	1.16011	-0.79504	-0.698248	-0.894605	+	oe_kk47	1.628	0.0235505	0.0140713	-0.399684	-3.56168	P43246;A0A2R8YFH0;E9PHA6;A0A2R8Y6P0;A0A2R8YG02;A0A2R8Y7S8;A0A2R8Y713	MSH2
0.751776	0.89514	0.971354	-1.3917	-0.591303	-0.635266	+	oe_kk47	2.54453	0.00285411	0.00215249	-0.295346	-6.52194	P43304;F5GYK7;E7EM56	GPD2
-0.579177	0.744658	0.886077	0.854162	-0.328588	-1.57713			0.344531	0.452344	0.443779	-0.391865	-0.831704	P43355;Q3SYA6;A0A0A0MSA3;P43358;P43361;A2A368;A8MXT2;Q96M61;O15480;P43363;O60732	MAGEA1
0.802896	-0.995092	-1.48593	0.325507	0.415135	0.937482			0.707979	0.195894	0.13437	0.514776	1.55078	P43487;F6WQW2;C9JXG8;C9JJ34;C9JGV6;C9JDM3;C9JIC6;Q5T0Z6;Q9C010	RANBP1
-1.28815	-0.98666	0.106072	1.23572	0.910155	0.0228682	+	oe_kk47	1.21864	0.0604449	0.0331439	0.131183	2.59374	P43686	PSMC4
1.06422	0.945725	0.676298	-1.0524	-1.00847	-0.625368	+	oe_kk47	3.26362	0.000544979	0.000872	-0.333857	-10.0797	P43897;C9JT21;C9JG32;F8VPA7;F8VS27;F8WCK2;A0A494C1M9	TSFM
-1.29362	1.31207	-1.05877	0.464436	0.514339	0.0615497			0.339515	0.457599	0.452001	0.519955	0.821312	P45877	PPIC
1.89937	-0.861615	-0.0636989	-0.547891	0.143964	-0.570129			0.310705	0.488984	0.501277	-0.050017	-0.76112	P45880;A0A0A0MR02;Q5JSD2;Q5JSD1;A2A3S1	VDAC2
-1.74119	-0.610409	0.331989	0.752829	0.874551	0.392232			1.02528	0.0943452	0.0527197	0.442102	2.18379	P45954	ACADSB
0.802412	0.745638	1.0987	-1.04368	-0.470771	-1.13231	+	oe_kk47	2.77762	0.00166871	0.00184494	-0.483952	-7.52624	P45973;F8VNY3	CBX5
0.316325	1.16486	1.07891	-1.01604	-0.493972	-1.05008	+	oe_kk47	2.20512	0.00623562	0.00442268	-0.296981	-5.26444	P45974;A0A7P0TB18;F5H571	USP5
-0.0870864	0.602654	-1.97865	0.470992	0.506845	0.485242			0.560859	0.274879	0.208433	0.898874	1.26398	P45984;J3KNK1;D7R525;A0A1W2PRF2;D6RCB1;D6R9C1;A0A1W2PPZ3;E5RJ57;A0A286YFK3	MAPK9
0.469143	-1.72025	-0.0630373	1.24155	0.40549	-0.332896			0.474357	0.335462	0.276493	0.276067	1.09388	P45985;R4GN37	MAP2K4
0.865705	-0.421962	-1.57557	0.702524	-0.494003	0.923308			0.381567	0.415368	0.38335	0.0469468	0.907719	P46013	MKI67
-0.995803	-0.703044	-0.991484	1.17632	0.781695	0.732311	+	oe_kk47	3.33396	0.00046349	0.000691983	0.508456	10.5096	P46060;H0Y4Q3;B0QYT5;B0QYT4;B0QYT6	RANGAP1
-0.530159	0.749043	1.52305	-0.931536	0.161393	-0.971791			0.758025	0.174572	0.117955	-0.105866	-1.64861	P46063;F8WA66;F8WD97;F5H2L2;F5H4P4;F5H3W0;F5GYB7	RECQL
1.37427	0.692095	0.563284	-0.89598	-0.935819	-0.79785	+	oe_kk47	2.6302	0.00234315	0.00199063	-0.739021	-6.87651	P46087;F5H5X6;F5GWB7;F5H709;F5GYR3;F5H359;F5H8G6	NOP2
-1.84917	0.42447	1.13155	-0.123107	0.112762	0.303502			0.0756974	0.840045	0.895413	0.11422	0.215328	P46100;A0A096LNL9;A0A6Q8PHA4;A0A096LNW1;H0Y3T0;A0A096LNL6;A0A096LP59;A0A096LNN3	ATRX
-1.40949	-0.797821	-0.332823	0.647648	1.11337	0.779113	+	oe_kk47	2.11415	0.00768865	0.00561233	1.15208	4.96318	P46108;I3L297	CRK
-1.18524	-0.932909	-0.560165	0.982727	0.78515	0.910435	+	oe_kk47	3.14153	0.000721888	0.00136918	0.748141	9.37249	P46109	CRKL
-1.14966	-1.34164	0.658502	1.0401	0.552339	0.240357			0.835624	0.146008	0.094136	1.08863	1.80136	P46199;H7C213	MTIF2
-1.51284	1.56096	0.201282	-0.394567	0.256959	-0.111787			0.0635976	0.863779	0.909701	-0.03991	-0.182892	P46734;E9PRZ0;J3QR49;J3KRV4;X6RB39;J3QL77;E9PMA8	MAP2K3
1.45654	-0.451041	-0.255579	-0.834759	-0.934645	1.01949			0.222197	0.599519	0.677532	-0.099781	-0.569428	P46736;X6RJS7;A0A087WZR3;H9KVA9;A0A0D9SF50;A0A0A0MS96	BRCC3
1.30544	0.960141	0.323116	-0.899768	-0.974331	-0.714598	+	oe_kk47	2.35527	0.00441296	0.00330631	-0.355071	-5.79339	P46776;E9PLL6;E9PJD9;E9PLX7;E9PKT2;H0YF34	RPL27A
1.19896	1.22777	-0.577069	-0.538834	-1.19049	-0.120333			0.85094	0.140948	0.0896181	-0.141297	-1.83171	P46778;G3V1B3;M0R181;M0R3I5	RPL21
1.4233	-0.049046	-0.914655	0.603372	-1.30808	0.245107			0.124575	0.750628	0.827814	-0.0567799	-0.340474	P46779;H0YKD8;H0YLP6;H0YMF4	RPL28
-0.10014	-1.08993	-1.30486	0.767505	0.768039	0.959385	+	oe_kk47	1.93839	0.0115242	0.00831169	0.636328	4.41853	P46781;B5MCT8;C9JM19;F2Z3C0;A8MXK4	RPS9
0.556098	-1.86559	-0.425263	0.445755	0.642618	0.646385			0.752225	0.176919	0.119432	0.983053	1.63725	P46783;Q9NQ39	RPS10
-1.12959	-0.798454	-0.773691	0.974698	1.01604	0.710998	+	oe_kk47	3.56745	0.000270738	0.000621984	4.40398	12.064	P46821;D6RA32;D6RA40;D6RCL2;D6RGJ3	MAP1B
-1.93993	0.415902	-0.00602417	0.626459	0.814396	0.089201			0.603538	0.249151	0.182557	0.160242	1.34728	P46926;D6R9P4;D6RFF8;D6RAY7;D6RB13;D6R917;D6RFK5	GNPDA1
1.29774	-0.179504	-1.74913	0.454703	0.118959	0.0572319			0.180089	0.660558	0.747367	0.0533886	0.473475	P46937;H0YCI3;H7C4S7;A0A0D9SGF8;A0A0D9SGI1;A0A0E3D6M1;E7EWI0;A0A1B0GTC0;A0A087WT53;H7C535;H7C4U7;A0A0D9SEY4;H7C5T8;A0A087WXD2;A0A1B0GTH8;A0A0D9SET0;A0A0D9SGF2;A0A1B0GUI9;A0A1B0GUF0;A0A1B0GUV4;Q86UL8;Q96QZ7	YAP1
-1.0326	-0.174723	-1.32546	0.775055	0.89917	0.858565	+	oe_kk47	2.083	0.00826038	0.00630879	1.45068	4.86316	P46939;Q5T097;H0Y337;A0A0D9SG57;A0A0A0MSM3;Q5JT45;Q5JT44;Q5JT49;Q5T098	UTRN
1.08874	0.82032	0.806108	-0.827158	-0.831244	-1.05677	+	oe_kk47	3.96011	0.00010962	0.000416988	-0.419069	-15.1863	P46940;A0A0J9YXZ5;H0YLE8;A0A087X225;H0YKA5;A0A087WWP1;E9PDT6	IQGAP1
-0.210254	-1.51354	-0.758393	0.872492	0.933379	0.676313	+	oe_kk47	1.89481	0.0127406	0.00889665	0.628794	4.29054	P46976;G5E9W8;C9JQ42;C9J8R8;C9J7C7	GYG1
-1.39286	0.0603818	0.154653	1.5163	-0.750579	0.412111			0.403785	0.394653	0.353298	0.341587	0.952786	P46977;A0A0C4DH80;E9PN73;E9PI32	STT3A
0.861614	0.92049	0.917287	-1.18902	-0.669963	-0.840409	+	oe_kk47	3.51399	0.000306203	0.000582915	-4.08328	-11.6899	P47712	PLA2G4A
-1.1455	-0.681977	-0.872797	0.843167	0.815438	1.04167	+	oe_kk47	3.53382	0.000292536	0.000596401	1.32235	11.8274	P47755;F8W9N7;A0A0D9SET8;C9JUG7	CAPZA2
0.882889	0.961424	0.891239	-0.847089	-0.920142	-0.968321	+	oe_kk47	5.72725	1.87392e-06	0	-0.942256	-42.2617	P47813;X6RAC9;O14602;A6NJH9	EIF1AX;EIF1AY
-0.991072	-0.823698	-0.918477	0.969119	0.867356	0.896772	+	oe_kk47	5.23997	5.7548e-06	0	3.39987	31.9022	P47895;H0Y2X5;H0YNQ3;H0YKF9;H0YMG7;O94788;H0YLT1	ALDH1A3
-0.9769	0.0232745	1.85259	-0.296752	0.113413	-0.715623			0.27959	0.525303	0.563487	-0.0661723	-0.695022	P47897;A0A0U1RQT0;C9J165;A0A0U1RQE9;A0A0U1RQL2;A0A0U1RRI9;A0A0U1RQM8;A0A0U1RQU2;F2Z2V6;A0A0U1RQC3	QARS
-0.24472	-1.62039	-0.547096	0.58333	0.879306	0.949569	+	oe_kk47	1.68906	0.0204616	0.0127342	0.370974	3.72072	P47985;P0C7P4	UQCRFS1;UQCRFS1P1
1.5589	-0.815425	-1.31566	0.149442	0.0349307	0.387818			0.160422	0.691159	0.77912	0.0722739	0.4273	P48047;H7C068	ATP5O
-1.18855	1.25286	1.18382	-0.669018	-0.311754	-0.267357			0.439252	0.363704	0.311822	-0.148888	-1.02404	P48059;A0A0J9YXC7;A0A0M3HER1	LIMS1
-1.38575	-0.780007	-0.444776	0.861133	0.903844	0.845559	+	oe_kk47	2.49085	0.00322961	0.00250159	0.907996	6.30784	P48147;A0A499FJL1	PREP
0.992974	-1.29473	-0.603223	-0.588611	1.25273	0.240854			0.282024	0.522367	0.558785	0.0879714	0.700237	P48163	ME1
-0.827945	-0.905314	-1.00112	0.8957	0.921475	0.917208	+	oe_kk47	5.44652	3.57668e-06	0	5.53777	35.9424	P48307;A0A3B3IS67;A0A3B3ISY1;A0A3B3IRW1;H7C4A3	TFPI2
0.421468	1.09653	1.10896	-0.671233	-1.09457	-0.861148	+	oe_kk47	2.6091	0.0024598	0.00210138	-0.449917	-6.78767	P48444;B0YIW6;Q6P1Q5;E9PK34	ARCN1
-0.72946	-0.251419	-1.51923	0.739998	0.87518	0.884925	+	oe_kk47	1.95676	0.0110469	0.00807575	2.25155	4.47325	P48449;A0A0G2JQD0;C9J315;A0A0G2JS81	LSS
-0.60957	0.0270069	-1.34628	0.981135	-0.363859	1.31157			0.927311	0.118219	0.0712539	0.282346	1.98429	P48507	GCLM
-1.21699	0.103831	1.78177	0.0670714	-0.197044	-0.538637			0.193099	0.641063	0.725398	-0.107845	-0.50352	R4GMR5;P48556;K7EJR3;K7EJC1;K7ERW6;K7ENY6	PSMD8
0.477731	-0.139612	-1.32904	-0.0921421	-0.551838	1.6349			0.317914	0.480935	0.487843	0.272951	0.776266	P48634	PRRC2A
1.13007	0.843703	0.547671	-1.25837	-0.22533	-1.03774	+	oe_kk47	2.03699	0.00918354	0.00688086	-0.342559	-4.71825	P48637;A0A2R8Y430;A0A2R8Y5T7;A0A2R8Y6Q7;A0A2R8Y7I7;A0A2R8YF34;A0A2R8Y2X9;A0A2R8Y6Y6;A0A2R8Y4V9;A0A2R8Y790;A0A2R8Y446;A0A0S2Z4J7;A0A2R8Y2F2	GSS
-1.30201	-0.650541	-0.695674	0.699701	1.04369	0.904837	+	oe_kk47	2.79158	0.00161592	0.00186702	0.405806	7.59046	P48643;E7ENZ3;B7ZAR1;E9PCA1;D6RIZ7;H0Y914	CCT5
-1.22815	-0.581378	-0.82677	0.599206	0.884078	1.15302	+	oe_kk47	2.68456	0.00206747	0.00208589	1.68853	7.11011	P48651;J3KNR6	PTDSS1
-1.28427	-1.15786	0.00786246	0.961967	0.755307	0.716994	+	oe_kk47	1.74863	0.017839	0.0111439	1.18276	3.88015	P48723	HSPA13
-1.14196	-0.820963	-0.742265	0.992628	0.954346	0.758218	+	oe_kk47	3.6527	0.000222485	0.000666667	0.966192	12.6843	P48735;H0YL11	IDH2
-0.935342	-1.13625	-0.53187	0.511362	0.821061	1.27104	+	oe_kk47	2.44456	0.00359286	0.00260285	0.481534	6.12805	P48739;A0A0A0MSW4;B3KYB6;B3KYB7	PITPNB
-0.414047	1.05661	1.43879	-0.334016	-0.829637	-0.917698	+	oe_kk47	1.0997	0.0794877	0.0441889	-0.414324	-2.33875	P48960	CD97
1.62339	-1.39002	-0.236125	0.497464	-0.305969	-0.188742			0.000655353	0.998492	0.998418	0.000240326	0.00201049	P49005;A0A087WWF6;F8W8R3;C9JLE1;C9IZD2;C9J8Z7;C9JHC7;H7C1B3	POLD2
0.268192	-0.950514	-1.43144	0.149817	0.871089	1.09286	+	oe_kk47	1.14177	0.0721489	0.0399442	0.762	2.42784	P49006	MARCKSL1
-1.04551	-1.07745	-0.334464	0.748134	1.40854	0.300749	+	oe_kk47	1.8161	0.0152721	0.0102347	0.246568	4.06608	P49189	ALDH9A1
0.0578672	0.719843	1.36731	0.124879	-1.04244	-1.22746	+	oe_kk47	1.18456	0.0653793	0.0360482	-0.244989	-2.51969	P49207	RPL34
-1.61994	-0.273672	-0.546757	0.777214	0.74538	0.917774	+	oe_kk47	1.76588	0.0171443	0.0108351	1.52434	3.92714	P49247	RPIA
0.719747	1.09177	0.893378	-1.06635	-0.740606	-0.897932	+	oe_kk47	3.64493	0.000226501	0.000657224	-0.423159	-12.6265	P49257	LMAN1
-0.771328	0.692095	-1.64587	0.587756	0.233319	0.904029			0.744494	0.180097	0.122457	0.11996	1.62212	P49321;Q5T624;H0YF33;H0YDS9;E9PRH9;E9PPR5;E9PI86;E9PPQ8;E9PNB5	NASP
-1.7029	0.446329	0.780089	-0.212585	-0.366018	1.05509			0.1298	0.741652	0.821831	0.0118268	0.353366	P49327;A0A0U1RQF0;A0A0U1RRG3;A0A1B0GTR5;J3KTF0	FASN
-1.01553	1.08684	1.36343	-0.404037	-0.173233	-0.857478			0.543555	0.286052	0.219793	-0.252215	-1.23012	P49354;B3KVN2;E9PQP6;E9PPM9;H0YCW1	FNTA
0.328022	-1.25416	-0.452487	0.628829	1.47903	-0.729234			0.510491	0.30868	0.244031	0.0684172	1.16521	P49366;A0A087WZK0;Q5J8M5;M0R264;M0R253;M0QX43;B4E3M2;A0A3B3IU31;M0R1T2;M0R0V2;M0R0J4;M0QYZ7;M0R1T4;M0QZT3	DHPS
-1.40421	-0.666763	-0.448403	1.01078	1.08818	0.420409	+	oe_kk47	2.02888	0.00935664	0.00697483	0.285027	4.69303	P49368;B4DUR8;E9PRC8;Q5SZX6;E9PQ35;E9PM09;Q5SZW8;Q5SZX9	CCT3
-1.41811	-1.15077	0.543616	0.7107	0.652086	0.662474			1.03181	0.0929373	0.0521539	2.05098	2.19725	P49406;S4R3W9;H7C2J0;A0A0A0MRF4;S4R455	MRPL19
0.976536	1.0711	0.658962	-0.893444	-1.01352	-0.799637	+	oe_kk47	3.69005	0.00020415	0.000686391	-0.457904	-12.9656	P49411;H3BNU3	TUFM
1.17576	-0.0966768	-0.295527	1.20675	-0.790171	-1.20013			0.234673	0.582542	0.653191	-0.884958	-0.59719	P49427;U3KQP9;U3KQ77;U3KPV8	CDC34
1.00025	0.21801	1.06701	-0.329306	-0.34866	-1.60731	+	oe_kk47	1.41078	0.0388347	0.0220616	-0.12462	-3.02857	P49458;Q6P2S0;Q659G3;E9PE20	SRP9;DKFZp564M2223
0.770226	0.965819	0.99195	-0.881342	-0.859471	-0.987182	+	oe_kk47	4.64743	2.25201e-05	0.000981818	-0.854752	-22.6458	P49589;B4DKY1;E9PRS8;C9JLN0	CARS
0.791216	1.00221	0.934918	-1.00598	-0.871301	-0.851064	+	oe_kk47	4.67671	2.10518e-05	0.00102857	-0.908417	-23.0333	Q5T5C7;P49591	SARS
-1.00316	-0.78251	-0.896961	0.549884	1.07435	1.0584	+	oe_kk47	3.20586	0.000622501	0.00101721	2.59971	9.73919	P49593;A8MX49;B5MCT7;C9J2F3;C9JL74	PPM1F
0.600287	1.22052	0.822437	-1.12415	-0.926964	-0.592126	+	oe_kk47	2.7452	0.00179804	0.00178173	-1.86396	-7.37888	P49662;E9PMT1;H0YD34	CASP4
0.570631	1.37192	0.593816	-0.747236	-0.519906	-1.26923	+	oe_kk47	2.09804	0.00797921	0.00600641	-0.480335	-4.91126	P49720;A0A087WUL2;A0A087WXQ8;A0A087WY10	PSMB3
-1.81884	1.02603	-0.145064	0.593489	0.493509	-0.149126			0.295516	0.506389	0.531831	0.0904268	0.729007	P49721;A0A087WVV1	PSMB2
-1.4397	1.50177	-0.632238	0.124391	0.503427	-0.0576441			0.159759	0.692215	0.779598	0.0346864	0.425725	P49736;H0Y8E6;F8WDM3;H7C4N9;C9J013;C9JZ21	MCM2
1.04519	0.884422	0.749054	-0.727881	-0.718758	-1.23202	+	oe_kk47	3.14656	0.000713576	0.00138909	-0.334501	-9.40067	P49748;G3V1M7;K7EQP4;J3QRJ8;J3KSR4;J3QKU9;K7EJW8;J3KS89;K7EMF8	ACADVL
1.6461	0.183493	-0.263701	-1.06482	-0.931631	0.430559			0.627466	0.235795	0.170416	-0.221948	-1.3939	P49750;F8VU51;H0YIQ2;H0YI23	YLPM1
0.624809	-0.734606	1.6699	-0.258816	-0.221836	-1.07945			0.623547	0.237932	0.17216	-0.520887	-1.38627	P49754;H7BZX6	VPS41
-0.657976	1.06524	1.08675	0.186558	-0.206113	-1.47446			0.580252	0.262874	0.1966	-0.190897	-1.30186	P49755;G3V2K7	TMED10
0.866585	0.831056	1.00034	-0.672579	-0.848076	-1.17733	+	oe_kk47	3.48341	0.000328541	0.000559036	-0.763768	-11.481	P49756;E9PQU5;H0YE46;E9PSE8	RBM25
0.99583	-1.12274	1.44597	-0.239576	-0.631736	-0.447749			0.477048	0.33339	0.274641	-0.187376	-1.09921	P49757;G3V3Z8;G3V3R1;G3V3M5;G3V4S6;G3V433	NUMB
0.734061	0.792471	0.30454	0.606507	-1.66693	-0.770652			0.834073	0.14653	0.0944788	-0.589956	-1.79829	P49770;H0YJJ8;G3V5E5;H0YK01	EIF2B2
0.514463	0.958735	1.18342	-1.0372	-0.690092	-0.92933	+	oe_kk47	2.87579	0.0013311	0.00155556	-0.71229	-7.9886	P49773;D6REP8;D6RE99;H0YC49;D6RD60;A0A6Q8PGQ8;D6RC06	HINT1
1.93067	-0.0874209	-0.295367	-0.63651	-0.878291	-0.0330799			0.615341	0.242471	0.176418	-0.0800463	-1.37028	P49790	NUP153
1.57377	0.424264	0.500907	-0.889528	-0.859294	-0.750123	+	oe_kk47	1.95261	0.011153	0.00828157	-0.37131	-4.46084	P49792;F8W705;H0YBN8;C9J6W1;F8WBP7	RANBP2
1.43567	0.289783	-0.0483871	0.285353	-1.63143	-0.330989			0.707176	0.196256	0.13451	-0.415419	-1.54921	P49841;A0A7I2YQK0;A0A3B3ITW1;A0A7I2V3J4;A0A7I2V4F3;A0A7I2V3D8;A0A7I2V5G5;A0A7I2V3T3;A0A7I2V441;A0A7I2V2V4;A0A7I2V5K9;A0A7I2V4X2;A0A7I2V3G9;A0A7I2V2U4;A0A7I2V3Z5;A0A7I2V4X3;A0A7I2YQU1;A0A7I2V2Y0;A0A7I2V2K7;A0A7I2YQB0;A0A7I2V2I5;A0A7I2V606;A0A7I2V3N7	GSK3B
0.630693	0.335996	-1.68638	0.0396599	1.18045	-0.500427			0.211206	0.614885	0.697496	0.0273393	0.544731	P49903;Q5T5U6;Q5T5U7	SEPHS1
-0.805448	-0.239872	-1.4127	1.02497	0.384412	1.04864	+	oe_kk47	1.81792	0.0152083	0.0102415	2.18514	4.07117	P49914;A0A0U1RR23;A0A0A6YYL1;A0A0U1RQM3;H3BN04	MTHFS;ST20-MTHFS
-1.29299	-0.841289	-0.51482	0.863383	0.804714	0.981005	+	oe_kk47	2.79997	0.001585	0.00187952	0.65184	7.62934	P49915	GMPS
-1.12412	-0.405325	-0.041271	0.486937	-0.629857	1.71363			0.630749	0.234019	0.169339	0.175388	1.4003	P49916	LIG3
1.02185	1.31294	0.144631	-1.15417	-0.683142	-0.642105	+	oe_kk47	1.88564	0.0130125	0.00913454	-0.348794	-4.26398	P50213;H0YL72;H0YLI6;H0YMU3;H0YKD0;H0YNF5;H0YM64;H0YM46	IDH3A
0.915691	0.893262	0.92588	-1.00017	-0.894441	-0.840218	+	oe_kk47	5.54425	2.85595e-06	0	-7.51814	-38.0278	P50238;K4DIB9;H3BRQ4	CRIP1
-0.639351	-0.819395	-1.20737	1.06665	0.950055	0.649416	+	oe_kk47	2.98219	0.00104186	0.00137539	0.292139	8.51853	P50395;Q5SX87;V9GYF8;Q5SX90;Q5SX86;V9GYJ7;Q5SX91	GDI2
0.865973	0.940525	0.896863	-0.620342	-1.09995	-0.983068	+	oe_kk47	3.60648	0.000247469	0.000639118	-0.4882	-12.3443	P50402;A0A804HIV7;Q5HY57;A0A804HLA2;F8WEQ1;A0A804HIG7	EMD
1.81598	-0.578093	0.500767	-0.36454	-0.828966	-0.545146			0.755367	0.175644	0.118711	-0.242704	-1.64341	P50416;H3BP22;H3BUV7;H3BMD2;H3BUJ0;Q92523	CPT1A
1.12477	0.577457	0.835121	-0.309156	-0.863081	-1.36511	+	oe_kk47	2.1022	0.00790315	0.00582315	-0.523546	-4.92463	P50452;H7BXK7;A0A1B0GU38;C9JVA8;C9JTJ8	SERPINB8
0.999453	0.822959	0.908056	-0.825125	-0.912227	-0.993115	+	oe_kk47	4.87758	1.32562e-05	0	-2.25134	-25.8735	P50454;E9PJH8;E9PPV6;E9PR70;E9PKH2;E9PK86;E9PMI5;E9PNX1;E9PIG2;E9PRS3;E9PQ34;H0YEP8;E9PLA6	SERPINH1
-0.757227	-1.02134	-0.865178	1.32527	0.590625	0.727852	+	oe_kk47	2.74977	0.00177922	0.00178854	0.471722	7.39949	P50502;H7C3I1;Q3KNR6;Q8NFI4;Q8IZP2;F6VDH7;F8WAQ7	ST13;ST13P5;ST13P4
-0.955237	-0.691197	-1.05566	0.983786	1.01917	0.699144	+	oe_kk47	3.57598	0.000265473	0.000625337	1.13925	12.1247	P50552;K7ENL7;K7EM16;K7ENR7;K7EIG8;K7EQD0	VASP
-1.5405	-0.839248	0.612513	1.07587	0.620323	0.0710359			0.778838	0.166403	0.111472	0.126315	1.68943	P50570;K7EPK9;K7ENE7	DNM2
-1.10772	-0.476094	1.2551	-0.770765	1.17123	-0.0717607			0.0857497	0.820824	0.881821	0.0533333	0.241802	P50583	NUDT2
-0.96334	-1.1998	0.269005	0.0703669	1.57974	0.24403			0.892901	0.127967	0.0780715	0.338305	1.91527	P50748;E7ES84;J3KQF2;F5H5V0	KNTC1
-1.04058	-0.325589	-1.24009	0.937897	0.802652	0.865712	+	oe_kk47	2.46256	0.00344699	0.00263777	1.94919	6.19747	P50749;Q9H2L5	RASSF2
-1.02511	1.46375	-1.01488	0.857811	-0.164384	-0.117191			0.161755	0.689041	0.776928	0.0540778	0.43046	P50750;X6RE90	CDK9
-0.321579	1.48778	0.402733	0.231092	-0.249082	-1.55095			0.62954	0.234671	0.169397	-0.100691	-1.39794	P50914;E7EPB3	RPL14
0.226473	-1.26627	-1.23943	0.934323	0.54647	0.798434	+	oe_kk47	1.3996	0.0398474	0.0224982	0.377266	3.00241	P50990;H7C4C8;H7C2U0	CCT8
-0.973357	-1.06466	-0.609254	1.10959	1.02813	0.509551	+	oe_kk47	2.78249	0.0016501	0.00185469	0.380114	7.5486	P50991	CCT4
1.32235	0.641068	0.258919	-0.767437	0.0229057	-1.4778	+	oe_kk47	1.30139	0.0499586	0.0282445	-0.145822	-2.77725	P50995;H0Y6E1;E5RIN3;P27216	ANXA11
-0.688549	-1.12201	-0.872009	0.638429	0.9523	1.09184	+	oe_kk47	3.20492	0.00062385	0.00101527	0.986637	9.73373	P51114;B4DXZ6;E9PFF5;E7EU85;C9JAJ4;H7C4S4;C9JZE0;C9JY20;C9IZ22;C9JYQ6;C9J5B4	FXR1
-0.962418	-0.977164	-0.789801	0.879023	0.997703	0.852657	+	oe_kk47	4.76907	1.70188e-05	0	0.435169	24.2987	P51116;I3L1Z2	FXR2
0.18316	0.373158	1.57772	-0.304782	-0.379831	-1.44943	+	oe_kk47	1.16927	0.067722	0.0374952	-0.226671	-2.48671	P51148;K7ENY4;K7ERI8;K7ERQ8;F8VVK3;F8VVZ0;F8VSF8;K7EIP6;F8WCY6;F8WD79;F8VPW9;F8VWZ7	RAB5C
-0.718869	1.16352	1.1471	-0.250487	-0.0181858	-1.32308			0.645243	0.226338	0.161775	-0.161232	-1.42852	P51149;A0A6Q8PGE6;A0A6Q8PG52;A0A6Q8PH84;C9J8S3;C9J592;C9J4V0;C9IZZ0;C9J4S4;C9J7D1;A0A6Q8PF79	RAB7A
0.974528	0.688582	0.701288	0.0953657	-1.38805	-1.07171	+	oe_kk47	1.57297	0.0267319	0.0153729	-2.03159	-3.42197	P51151;A0A1B0GUI0;Q9NP90	RAB9A
-1.46764	0.0967186	0.917413	1.28297	-0.464857	-0.364597			0.122702	0.753873	0.830048	0.0800533	0.335834	P51153;A0A087WWB9	RAB13
-1.36211	-0.870038	-0.366166	0.838194	0.912084	0.848032	+	oe_kk47	2.41232	0.00386972	0.00261797	0.68878	6.0054	P51398;V9GZ03;V9GYL9;V9GYA7;V9GYJ9;V9GZ61;V9GYC9;V9GY11;V9GYJ3;V9GYF7	DAP3
-0.0923975	-1.36439	-0.62436	1.03791	-0.226268	1.2695	+	oe_kk47	1.09944	0.0795353	0.0441694	0.183404	2.3382	P51452;K7ES89;K7ELG5	DUSP3
0.946925	0.72157	1.0488	-0.802175	-0.905691	-1.00942	+	oe_kk47	4.04242	9.06943e-05	0.000465517	-0.875921	-15.9336	P51553;E7EQB8;E9PF84	IDH3G
-0.434165	1.64785	0.699749	-0.144636	-0.987405	-0.781389			0.911839	0.122507	0.0743238	-0.725751	-1.9532	P51570;K7EII7;K7ERJ9;K7ERN9	GALK1
1.0069	-0.450007	-1.45188	0.123844	1.21111	-0.439967			0.277985	0.527248	0.566088	0.113242	0.691577	P51571;A6NLM8	SSR4
0.874373	-1.44485	-0.564449	1.34324	-0.0635927	-0.144718			0.38304	0.413962	0.380797	0.122068	0.910719	P51572;A0A2R8Y5M6;C9JSP1;C9JQ75;C9J0M4;C9JMD7;C9JM14	BCAP31
1.33724	0.385918	0.874464	-0.688855	-0.922959	-0.985803	+	oe_kk47	2.40808	0.00390769	0.0026	-0.721847	-5.98942	P51580	TPMT
0.760689	1.05745	-1.41073	-0.767562	-0.393936	0.754088			0.108742	0.778499	0.849902	-0.0534401	-0.300878	P51608	MECP2
-0.93352	-0.343127	-1.29447	0.561222	1.01846	0.991435	+	oe_kk47	2.25988	0.00549693	0.00391778	2.07114	5.45264	P51649;C9J8Q5;A0A5F9ZI23;A0A5F9ZH98;A0A5F9ZH05	ALDH5A1
-1.69472	-0.676942	0.976875	0.645503	0.279786	0.469499			0.519853	0.302097	0.236844	0.124711	1.18362	P51665;H3BNT7;H3BTM8;H3BQV2	PSMD7
0.878624	0.865202	0.958562	-1.18076	-0.826895	-0.694731	+	oe_kk47	3.58287	0.000261294	0.000630435	-1.99057	-12.174	P51692;K7EK35;A0A7I2V380;A0A7I2YQY3;P42229;K7EIF9;A0A7I2YQF1;C9J4I3	STAT5B;STAT5A
0.777475	0.16925	1.34993	-0.953012	-0.0661556	-1.27749	+	oe_kk47	1.43222	0.0369641	0.0206807	-0.479811	-3.0791	P51809;E5RH06	VAMP7
1.64538	0.758079	-0.171922	-0.657031	-0.694326	-0.880177	+	oe_kk47	1.31649	0.0482514	0.0272256	-0.367254	-2.81133	P51812;B1AXG1;B7ZB17;B4DG22;A0A2R8Y603;Q9UK32;A0A2R8Y7S9;B1AXG2;A0A2R8YGB7	RPS6KA3
1.31832	0.761484	0.555118	-0.698964	-0.892085	-1.04387	+	oe_kk47	2.67297	0.00212339	0.00205314	-0.836606	-7.05975	P51858;H3BPQ6	HDGF
-0.146422	1.56006	0.0227211	-1.57832	0.217718	-0.0757575			0.54453	0.285411	0.218709	-0.133238	-1.23203	P51948;H0YJ92;H0YJF2	MNAT1
0.0742863	-1.43189	-0.958126	0.373035	0.972153	0.970537	+	oe_kk47	1.46947	0.0339258	0.019098	0.630457	3.16791	P51970	NDUFA8
0.838231	0.322471	1.28823	-0.655846	-0.398491	-1.3946	+	oe_kk47	1.79073	0.0161909	0.0104788	-0.14808	-3.99548	P52209;K7EM49;K7EMN2;K7EPF6;K7ELN9	PGD
1.61143	0.634115	0.156215	-0.650624	-0.976102	-0.775039	+	oe_kk47	1.66228	0.0217631	0.0134594	-0.324853	-3.65045	P52272;A0A087X0X3;M0QZM1;M0R019;M0R2T0;M0R0N3;M0R2I7;M0QYQ7;M0QY96;M0R0Y6;M0QYL3	HNRNPM
0.42161	0.0827874	-0.86086	1.50499	-1.33248	0.183953			0.0937403	0.80586	0.871292	0.0284328	0.262557	P52294;C9JYI4;C9JWD9;C9J4U1;C9J352;F2Z3G4	KPNA1
-0.280882	-0.299699	1.80863	0.087704	-0.071862	-1.24389			0.428929	0.372453	0.322712	-0.204894	-1.00338	P52306;H0Y8M2;D6RHH8;D6REZ0;D6RBC6;D6RHZ7;D6RB97	RAP1GDS1
1.90092	0.0552592	-0.184753	-0.359194	-1.04012	-0.372113			0.782341	0.165067	0.110652	-0.18186	-1.69631	P52565;J3KTF8;J3QQX2;J3KRE2;J3KRY1;J3KS60	ARHGDIA
1.17136	0.274977	-1.51687	-0.86976	0.632726	0.307567			0.0171067	0.961376	0.975642	0.00469208	0.0515271	P52594;B8ZZY2;C9J2I0	AGFG1
1.3508	0.419516	0.637152	-0.749701	-0.25564	-1.40213	+	oe_kk47	1.67681	0.021047	0.0131184	-0.0893046	-3.68847	P52597;A0A1B0GW42	HNRNPF
0.566425	1.17628	0.907931	-1.029	-1.03162	-0.590016	+	oe_kk47	2.81489	0.00153148	0.00190244	-0.352801	-7.69885	P52701;A0A494C0M1;A0A087WWJ1;A0A087WYT6;F8WAX8;C9JH55;C9J8Y8;C9J7Y7;F8W7G9	MSH6
-1.51761	-0.345906	-0.662124	0.868444	0.752971	0.904229	+	oe_kk47	2.05374	0.00883609	0.006446	2.10121	4.77062	P52732;A0A7I2V3A9;A0A7I2YQY4;A0A7I2V3V3	KIF11
0.949691	0.905436	0.863023	-0.79239	-0.802709	-1.12305	+	oe_kk47	4.07809	8.3543e-05	0.000497696	-3.13695	-16.2684	P52735	VAV2
1.48597	0.892827	-0.0399316	-0.559822	-1.11004	-0.669002	+	oe_kk47	1.51706	0.0304046	0.0177698	-0.223173	-3.28336	P52758;H0YBX3;H0YB34	HRSP12
-1.77295	-0.281369	-0.0940605	0.543385	1.10693	0.498067	+	oe_kk47	1.1893	0.0646696	0.0354049	0.526793	2.52993	P52788;H7C2R7	SMS
0.971061	0.925129	0.827005	-1.0643	-0.894779	-0.764116	+	oe_kk47	4.32377	4.74493e-05	0.000666667	-1.07872	-18.7688	P52888;K7EP46;K7EKB6;K7EL02;K7EL32;K7EMU4	THOP1
0.701467	0.911494	1.09227	-1.06881	-0.780869	-0.85555	+	oe_kk47	3.65364	0.000222004	0.000668588	-0.4098	-12.6913	P52907	CAPZA1
1.47372	0.230132	0.779008	-0.972989	-0.957129	-0.552744	+	oe_kk47	1.89707	0.0126745	0.00887298	-0.801193	-4.29712	P52943;H0YFA4;H0YHD8	CRIP2
1.69663	0.0495769	0.383645	-0.550293	-0.330722	-1.24884	+	oe_kk47	1.16351	0.0686262	0.0382613	-0.160395	-2.47435	P52948;A0A3B3ITD8;H7C3P6;H0YDF4;H0YCT1;H0YEN4;H0YCR0;H0YDA1	NUP98
-1.08118	-0.886559	-0.74727	1.03331	0.79154	0.890155	+	oe_kk47	3.95427	0.000111104	0.000410646	1.42111	15.1346	P53004;C9J1E1	BLVRA
-0.433721	-0.584772	-1.51136	1.02694	0.72178	0.781125	+	oe_kk47	2.07083	0.00849513	0.00628391	0.46861	4.82451	P53007;B4DP62	SLC25A1
-0.604498	-0.979277	-0.971638	0.568228	1.45952	0.527663	+	oe_kk47	2.18292	0.00656266	0.00491787	0.278198	5.18963	P53041;H0YDU8;A8MU39	PPP5C
-0.681781	-0.867653	-1.12432	0.640771	0.873025	1.15996	+	oe_kk47	3.07846	0.000834718	0.00148805	1.77639	9.02546	P53350;I3L2H5;I3L387;I3L309	PLK1
0.891905	0.523606	1.11574	-1.03913	-0.24984	-1.24228	+	oe_kk47	2.07661	0.00838282	0.0063038	-0.451059	-4.84284	P53367	ARFIP1
0.823372	0.959301	0.90884	-1.08752	-1.03299	-0.571003	+	oe_kk47	3.35542	0.000441144	0.0005	-1.18168	-10.6441	P53384;I3L531;I3L3A0	NUBP1
-1.23168	-0.741162	-0.663344	1.16427	0.901534	0.570376	+	oe_kk47	2.68357	0.00207219	0.00207824	0.319925	7.10579	P53396;K7ESG8;K7EIE7	ACLY
1.74462	-0.15517	0.413735	-0.323988	-0.488701	-1.19049			1.00661	0.0984895	0.0553784	-0.0800279	-2.14539	P53582;H0Y955;H0Y903;H0Y9L0;D6RF24;H0YAI3	METAP1
-1.39234	1.51884	0.128385	-0.67525	-0.101036	0.5214			0.0650995	0.860797	0.908238	-0.0175826	-0.186954	P53597;A0A494C0D1;H7C233	SUCLG1
-0.571771	-1.04921	-1.06312	1.04401	0.7604	0.879684	+	oe_kk47	3.22884	0.000590419	0.00103101	1.46356	9.87333	P53602;H3BP35;H3BQ47;H3BRZ1;H3BVC4	MVD
0.318409	1.69777	-1.19134	0.204732	-0.626568	-0.402999			0.250356	0.561881	0.623153	-0.0980765	-0.631708	Q5T4U8;P53611	RABGGTB
0.510887	0.869968	1.26507	-0.976663	-0.702978	-0.966283	+	oe_kk47	2.76984	0.00169887	0.00183051	-0.259952	-7.49065	P53618;E9PP73;E9PP63;E9PKQ1	COPB1
0.405475	1.30855	0.799967	-0.94153	-0.361652	-1.21081	+	oe_kk47	2.00812	0.00981477	0.00737378	-0.14407	-4.62896	P53621;A0A3B3IT15;A0A3B3IS84;A0A3B3ISC6;A0A3B3IU89;A0A3B3ITV3;A0A3B3ISK1;A0A3B3ITI7;A0A3B3IU78;A0A3B3ITX2;A0A3B3IS23;A0A3B3IU84	COPA
1.7927	-0.0424241	0.245318	-1.00917	-0.82434	-0.162081			0.99814	0.100429	0.0571498	-0.379048	-2.12804	P53701	HCCS
0.946948	0.664241	0.827552	-1.48045	-0.883083	-0.0752045	+	oe_kk47	1.76125	0.0173281	0.0109512	-4.1371	-3.91448	P53985;Q5T8R3;Q5T8R5	SLC16A1
-0.307152	-1.04865	-1.2282	0.886883	1.0368	0.660316	+	oe_kk47	2.32871	0.00469127	0.00367778	0.577216	5.69681	P53990;H3BMU1;H3BUI0;H3BQF7;J3KR23;F5GXM3;H3BRE2;H3BPP6	IST1
1.72849	-0.394497	0.565629	-0.882872	-0.855074	-0.161677			0.898238	0.126404	0.0770239	-0.117393	-1.92594	P53992;G5EA31;A0A0U1RR49	SEC24C
0.933356	0.766173	1.02189	-1.00788	-0.939391	-0.774148	+	oe_kk47	4.22893	5.90296e-05	0.000586957	-1.50032	-17.762	P53999;D6RC37;D6R970	SUB1
0.393722	0.36939	0.688791	0.750387	-0.311849	-1.89044			0.553982	0.279266	0.212884	-0.101367	-1.25053	P54105;E9PMI6;J3KN38;E9PJF4;E9PQ83	CLNS1A
-1.76133	-0.0413726	1.12479	0.24283	0.706023	-0.270944			0.196353	0.636278	0.720707	0.0266031	0.510977	P54136;E5RJM9;E5RH09;E5RI24	RARS
-1.08627	-0.754658	-0.879996	0.954236	0.933033	0.833659	+	oe_kk47	4.20474	6.24108e-05	0.000559585	2.59029	17.5137	P54278;A0A2R8Y6S3;C9J167	PMS2
0.796727	1.03223	0.890157	-0.821128	-0.822688	-1.0753	+	oe_kk47	4.12015	7.58316e-05	0.000514286	-0.797901	-16.6721	P54577;A0A6Q8PFX2;A0A0C4DGZ5;A0A6Q8PFX4;A0A6Q8PF15;A0A6Q8PFC1	YARS
-1.27678	-0.511726	-0.824089	1.14172	0.883079	0.58779	+	oe_kk47	2.50479	0.00312759	0.00243255	0.72249	6.36288	P54578;A6NJA2	USP14
-1.34032	-0.618351	1.53846	0.0894834	0.607876	-0.277147			0.112582	0.771646	0.844234	0.075613	0.310558	P54619;F8VYY9;F8VPF5;F8VVA3;H0YIC9;H0YHF8;F8VSL2;F8VZX1;F8VSH3;F8VRY2	PRKAG1
-0.572956	-0.737642	-1.24013	0.428668	0.783213	1.33885	+	oe_kk47	2.16123	0.00689874	0.00504013	0.884422	5.11736	P54709;C9JA36;C9JXZ1;C9J6S2;H7C4L9;H7C547;F8WBY4	ATP1B3
-0.655573	-1.11305	-0.603102	1.38461	-0.0371402	1.02425	+	oe_kk47	1.58974	0.0257194	0.0146373	0.54878	3.46418	P54725;A0A494C0B4;K7ENJ0;K7ELW1;K7EQ16	RAD23A
0.911323	0.676314	1.12072	-0.97075	-0.914077	-0.823526	+	oe_kk47	3.73882	0.000182465	0.00072956	-1.22517	-13.342	P54727;Q5W0S5;Q5W0S4;H0Y579	RAD23B
0.0872726	0.909221	1.12715	-0.616513	0.0769263	-1.58406	+	oe_kk47	1.15505	0.0699761	0.0389388	-0.181132	-2.45621	P54886	ALDH18A1
1.33698	0.908188	0.227809	-0.701048	-0.515543	-1.25639	+	oe_kk47	1.86469	0.0136556	0.00954733	-0.141865	-4.20364	P54920;M0R0Y2;M0R2M1;M0R058;M0R213;M0R027;M0QZM9;M0QZN5;M0R031;A0A087WZQ7;Q9H115	NAPA
0.655711	0.943335	1.10905	-0.910048	-0.951385	-0.846665	+	oe_kk47	3.73159	0.000185528	0.000725	-0.84194	-13.2855	P55010;H0YN40;H0YLZ1;H0YMJ8;H0YM54;H0YK11;H0YK29	EIF5
-0.470712	-1.5158	0.00802137	0.616592	1.44683	-0.0849294			0.979367	0.104866	0.061427	0.172761	2.08971	P55036;Q5VWC4;A6PVX3;H0Y3Y9;H0Y561	PSMD4
-0.269605	1.05555	1.34773	-0.277948	-0.613515	-1.24221	+	oe_kk47	1.16877	0.0678	0.0377062	-0.345365	-2.48563	P55039;A8MZF9;J3QKW7;J3QRI9;J3KRL5;J3QR71;J3QL90;J3QKV7;J3QLF3	DRG2
-0.723849	-0.858475	-1.11562	0.980467	0.688028	1.02945	+	oe_kk47	3.48256	0.000329185	0.000557692	0.382772	11.4752	P55060	CSE1L
-1.06199	-0.868138	-0.770591	1.13661	0.851373	0.712728	+	oe_kk47	3.54377	0.00028591	0.000601036	0.45256	11.8969	P55072;A0A7P0TAW3;A0A7I2V540;C9JUP7;A0A7P0T8A3;A0A7P0T8Q5;A0A7P0TAQ1;A0A7P0Z4C6;A0A7I2V2Y2;A0A7I2V5G8;A0A7P0TAY0;A0A7P0TBK7;A0A7P0Z4D1;A0A7P0TA22;A0A7P0T946;A0A7P0T971;A0A7P0T9X5;A0A7I2YQJ0;A0A7P0T8D6;A0A7P0T8Q4	VCP
0.221797	-0.874318	1.5197	-0.482071	0.69355	-1.07865			0.266881	0.540903	0.590399	-0.117538	-0.66765	P55081	MFAP1
-1.79122	0.276359	0.934006	-0.498534	0.616265	0.463121			0.163281	0.686624	0.774569	0.0249583	0.43407	P55084;F5GZQ3;B5MD38;C9JEY0;C9JE81;C9K0M0	HADHB
0.0645284	-1.09156	-1.3599	0.945113	0.615142	0.82667	+	oe_kk47	1.62565	0.0236783	0.0141175	0.33164	3.55566	P55145;H7C2D6	MANF
1.10875	0.8947	0.708663	-0.800639	-0.961916	-0.949562	+	oe_kk47	3.85402	0.000139952	0.000369863	-1.58582	-14.2732	P55263;A0A5K1VW54;A0A5K1VW94;A0A5F9ZH31;A0A5F9ZH72;A0A5F9ZHJ1;A0A5F9ZGZ8;A0A5F9ZH83;A0A5F9ZH76	ADK
1.84514	-0.0541106	-0.703357	-0.982978	-0.303453	0.198762			0.360929	0.435583	0.416703	-0.0517069	-0.865509	P55265;A0A7P0Z4F9;A0A7P0Z4K3;A0A3B3ISU1;A0A3B3ISX1	ADAR
0.174776	-0.413901	1.9528	-0.58543	-0.616674	-0.511569			0.735442	0.18389	0.125228	-0.256932	-1.60442	P55268	LAMB2
0.911399	0.892358	0.87908	-1.22205	-0.589122	-0.871664	+	oe_kk47	3.20902	0.000617988	0.00101916	-0.309589	-9.75752	P55327;E5RK35	TPD52
-0.0801161	1.53468	0.754349	-1.25157	-0.329293	-0.628049	+	oe_kk47	1.27985	0.0524989	0.0297717	-0.53242	-2.72897	P55735;A8MXL6;E7ERC8	SEC13
0.895926	0.0896897	1.10575	-1.16258	0.304914	-1.2337	+	oe_kk47	1.11247	0.0771845	0.0428994	-0.191629	-2.36566	P55769;B1AHD1;A0A3B3IRU2;A0A3B3ISH1	NHP2L1
-1.1237	-1.19636	1.31367	0.507281	-0.0653872	0.564499			0.324598	0.473589	0.476896	0.295066	0.790259	P55789;H3BRW3;H3BRD2;H3BQQ4	GFER
1.35844	0.593849	-1.63471	-0.0986523	-0.328579	0.109655			0.0825808	0.826836	0.886171	-0.025533	-0.233501	P55795	HNRNPH2
1.00006	0.81416	0.918549	-0.939778	-0.933297	-0.859691	+	oe_kk47	5.16554	6.83062e-06	0	-2.73765	-30.5598	P55809;E9PDW2;Q9BYC2	OXCT1
0.429048	1.19692	1.00383	-0.968479	-0.660843	-1.00048	+	oe_kk47	2.6314	0.00233668	0.00199297	-0.344868	-6.8816	P55884;C9JZG1;C9JQN7	EIF3B
-0.0665956	-0.0111577	-1.90801	0.816082	0.634248	0.535431			0.98729	0.10297	0.059865	1.59182	2.10586	P55957	BID
0.188205	-1.19965	-1.30497	0.786755	0.635316	0.894347	+	oe_kk47	1.47085	0.0338182	0.0191185	2.11579	3.17123	P56134;C9JU26	ATP5J2
0.89574	0.990086	0.838662	-0.770074	-0.902549	-1.05186	+	oe_kk47	4.39971	3.98373e-05	0.00075	-0.805008	-19.6152	P56182;D6RE82	RRP1
-0.666677	-1.6115	-0.0227623	0.983153	0.907102	0.410687	+	oe_kk47	1.44045	0.0362702	0.0204759	0.154502	3.0986	P56192;H0YHV5;H0YIP0;F5H2V6;F8VS26;F8W0M7;F8W0S4;F8VZZ9;H0YIC2;H0YI94;F8VPL7	MARS
0.471961	0.500982	1.50825	-0.534512	-1.16171	-0.78497	+	oe_kk47	1.89151	0.0128378	0.00909597	-2.57599	-4.28097	P56199;A0A494C0F7	ITGA1
0.829263	-0.272744	0.372172	-1.8625	0.155054	0.778757			0.291721	0.510833	0.538916	-0.641137	-0.720938	P56211;H3BMD8;H3BTD3;H3BQ52	ARPP19
1.42939	-0.403691	-0.821552	0.722292	-1.22745	0.30101			0.051395	0.888393	0.924966	-0.0191981	-0.149502	P56385	ATP5I
-0.203073	-0.544451	-1.54785	0.186993	1.12093	0.987444	+	oe_kk47	1.42977	0.0371732	0.0207676	0.279236	3.07331	P56537;B7ZBH1;A0A0U1RQV5;F8WD20;A0A0B4J1Y7;F8WDS6	EIF6
1.42935	0.508863	-1.55334	0.092559	0.0464096	-0.523841			0.102052	0.790584	0.859076	-0.0438919	-0.283888	P56545	CTBP2
-1.08582	-1.21298	-0.288829	0.796199	0.778018	1.01341	+	oe_kk47	2.34917	0.00447538	0.00339212	1.49939	5.77109	P56589;Q7Z6V3	PEX3
-0.255539	0.254561	-1.80856	0.119867	1.12514	0.564535			0.814988	0.153113	0.0997842	0.225801	1.76058	P57076;A0A669KBI0;A0A669KAW9;A0A5F9ZHZ7;A0A669KAW7;H7BZW1;A0A669KAZ0;C9J818;D3DSE6;A0A669KAY3;C9JX57;F8VZ95;H7C2R6;A0A669KAZ9;A0A669KBG3;Q9NX33;A0A669KB30	C21orf59
-2.03137	0.243047	0.370904	0.537799	0.420022	0.459601			0.533179	0.292969	0.22769	1.16761	1.20978	P57081	WDR4
-0.786645	-0.988931	-0.922808	0.617711	0.98806	1.09261	+	oe_kk47	3.49202	0.000322092	0.000561743	1.83548	11.5394	P57088;D6RAA6;H0Y8N0;J3KN43;D6RBY2	TMEM33
-0.730176	1.22626	-0.0492403	-1.48805	0.840243	0.200964			0.120661	0.757424	0.833438	-0.0388737	-0.330763	P57740;H0YG15;G3V1T4	NUP107
-0.250953	1.5487	0.625896	-0.190586	-0.314838	-1.41822			0.922059	0.119658	0.0723331	-0.476187	-1.97373	P57772;C9J8T0	EEFSEC
0.734762	1.04606	0.912855	-0.626863	-1.07676	-0.99005	+	oe_kk47	3.39618	0.000401624	0.000515556	-5.41454	-10.9041	P58107;A0A075B730	EPPK1
-0.799989	0.610331	1.57055	-1.22847	-0.068484	-0.0839386			0.511797	0.307753	0.24308	-0.11657	-1.16779	P58546;C9JL85	MTPN
1.10474	0.99732	0.585839	-0.798428	-0.846869	-1.0426	+	oe_kk47	3.29141	0.000511199	0.000897119	-0.302263	-10.2476	P60174;U3KPZ0;U3KQF3;U3KPS5	TPI1
-0.472199	1.2916	0.594634	-1.05208	0.708636	-1.07059			0.531169	0.294328	0.228552	-0.117975	-1.20584	P60468;S4R3B5	SEC61B
-0.652395	-0.170497	-1.42411	0.792058	0.0827115	1.37223	+	oe_kk47	1.34253	0.0454433	0.0257319	0.285497	2.87054	P60510;H3BTA2;H3BV22;I3L4X0;H3BPN5;H3BVE3	PPP4C
-0.530054	-0.710874	-1.3158	0.805623	0.488139	1.26296	+	oe_kk47	2.18908	0.00647023	0.00475234	0.564501	5.21032	P60604	UBE2G2
-0.920598	-0.631074	-1.0573	0.978963	1.23304	0.396969	+	oe_kk47	2.48042	0.00330811	0.0024858	0.361581	6.26698	P60842;J3KT12;J3QS69;J3QL43;J3KTB5;J3KSZ0;J3QR64;J3QLN6;J3KS25;J3QKZ9;J3KTN0;J3KS93;J3KT04;J3KSN7;J3QQP0;J3QL52;E7EMV8	EIF4A1
-0.242724	-1.06174	0.906814	-0.0998618	-0.946601	1.44411			0.105834	0.783729	0.854208	0.0210838	0.293512	P60866;A0A7P0S5H5;E5RJX2;G3XAN0;E5RIP1	RPS20
1.03416	0.851989	0.835014	-0.883082	-0.780673	-1.0574	+	oe_kk47	4.21611	6.07981e-05	0.000571429	-0.534651	-17.63	P60900;G3V295;G3V5Z7;G3V3I1;G3V3U4;H0YJC4;G3V4S5;G3V2S7	PSMA6
-1.26557	0.756977	1.46218	-0.658659	0.176603	-0.471526			0.302065	0.49881	0.517561	-0.185186	-0.742887	P60903	S100A10
-1.18254	-0.932452	1.46902	0.736491	0.0722042	-0.162731			0.185252	0.652752	0.739413	0.0693512	0.485443	P60953;A0A590UJK8;Q5JYX0;A0A494C1M1;A0A494BZX6;A0A3B3IRV0	CDC42
-1.11913	-0.771087	-0.699813	1.11889	1.14127	0.32987	+	oe_kk47	2.36297	0.00433541	0.00323791	0.56535	5.82164	P60981;F6RFD5	DSTN
-1.84343	-0.190182	0.863531	0.257183	0.866977	0.0459226			0.39999	0.398116	0.35854	0.199906	0.945114	P60983;G3V4P8;M0QYG8;M0R1D2;M0R0C1;M0QYJ8;O60234;G3V3X4	GMFB
0.220785	-0.867036	-1.55497	1.05863	0.507632	0.634966	+	oe_kk47	1.26777	0.0539796	0.0305306	0.344012	2.70205	P61006;H0YNE9;Q92930;H0YMN7;Q96E17	RAB8A;RAB8B
-1.50568	0.863992	0.814454	0.203345	0.590094	-0.966207			0.0431131	0.905497	0.936997	-0.0139071	-0.126424	P61011;G3V480;A0A7I2V5K0;G3V4F7;A0A7P0PJI2;A0A7I2V584;A0A7I2V5S0;A0A7I2V591;G3V346;G3V3L9	SRP54
-1.65362	-0.412459	-0.11648	0.84871	1.1527	0.181149	+	oe_kk47	1.23917	0.0576541	0.0321816	0.410478	2.63879	P61019;E9PKL7;H7C125;A0A3B3ITL1;E9PE37;H0YD31;H0YDL5;Q6PIK3	RAB2A
-0.781822	0.447807	-1.6675	0.701814	0.837624	0.462075			1.00474	0.0989145	0.0557565	1.50419	2.14156	P61020;F8VUA5	RAB5B
-0.0918719	0.346246	-1.94117	0.309282	0.860685	0.516827			0.714583	0.192938	0.132074	1.47468	1.56367	P61024;Q9BZU3;Q5T179	CKS1B
-0.574668	-0.831621	-1.2612	0.986752	0.866917	0.813822	+	oe_kk47	2.99875	0.00100288	0.00139297	4.38934	8.60381	P61026	RAB10
-0.285864	-0.422837	-1.33632	0.244715	0.10225	1.69806	+	oe_kk47	1.05507	0.0880907	0.0489978	0.23818	2.24542	P61081;M0QYI6;M0QX69	UBE2M
0.254932	1.29396	1.01238	-1.02113	-0.82941	-0.710731	+	oe_kk47	2.21083	0.00615418	0.00433362	-0.457214	-5.28381	P61086;D6RDM7;D6RFX1	UBE2K
-0.106084	0.608543	1.68199	-0.583131	-1.08978	-0.511531	+	oe_kk47	1.24202	0.057277	0.0318198	-0.323773	-2.64505	P61088;F8VSD4;F8VQQ8;F8VV71;Q5JXB2;F8VZ29	UBE2N;UBE2NL
0.896613	0.944082	0.894811	-0.84397	-0.983626	-0.90791	+	oe_kk47	5.71462	1.92921e-06	0	-1.56429	-41.9549	P61106;X6RFL8	RAB14
-1.20112	-0.824879	-0.647991	1.07594	0.693048	0.904999	+	oe_kk47	3.08163	0.000828648	0.0014906	0.545195	9.04264	P61158;B4DXW1;F8WDR7;Q9P1U1;F8WEW2;F8WE84;A0A0A0MTI9;H7C4J1;C9IZN3;Q9C0K3	ACTR3
-0.953727	-1.15149	-0.569974	0.951776	1.01768	0.705738	+	oe_kk47	3.09784	0.000798289	0.00151127	0.747965	9.13084	P61160;F5H6T1;A0A1B0GWD0;A0A1B0GWH0	ACTR2
-0.905757	-1.27113	-0.449825	1.04508	0.694542	0.887086	+	oe_kk47	2.60723	0.00247042	0.00209414	0.199523	6.77983	P61163;R4GMT0;A0A1B0GVS3	ACTR1A
0.56139	0.838715	1.20006	-0.735139	-0.570796	-1.29423	+	oe_kk47	2.42376	0.00376912	0.00256112	-0.203414	-6.0487	P61201;B4DIH5;H0YKU5;H0YMC2;H0YM03	COPS2
0.911256	0.818128	0.986514	-0.747227	-0.860058	-1.10861	+	oe_kk47	3.98754	0.000102911	0.000426877	-0.802215	-15.4315	P61221;D6R9I9;D6RGF4	ABCE1
-0.933694	-0.885133	0.174465	1.37883	-0.697261	0.962791			0.682811	0.207582	0.145171	0.183168	1.5017	P61224;F5H7Y6;E7ESV4;A6NIZ1;F5GX62;F5H823;F5H004;F5H6R7;F5GZG1;B7ZB78;F5H500;F5H0B7;F5H491;F5GYB5;F5GWU8;F5H077;F5H4H0;F5GYH7;F8WBC0	RAP1B
-0.232033	-1.24306	-1.02515	0.822997	0.473851	1.2034	+	oe_kk47	1.95726	0.0110342	0.00808163	0.868977	4.47477	P61225	RAP2B
-0.595063	1.07148	1.10662	-1.29724	-0.667086	0.381297			0.639201	0.229509	0.164751	-0.0724697	-1.41676	P61247;D6RAT0;D6RG13;E9PFI5;D6RB09;H0Y8L7;H0Y9Y4;D6R9B6;D6RAS7;D6RED7;D6RI02;D6RGE0	RPS3A
1.65948	-0.913332	-0.487779	0.789986	-0.538655	-0.509701			0.0660548	0.858905	0.907269	-0.0270507	-0.189532	P61254;J3QRI7;J3QQQ9;J3QQV1;J3QRC4;J3KSS0;J3KS10	RPL26
0.475843	1.32137	0.727585	-0.626469	-1.33896	-0.559366	+	oe_kk47	2.05035	0.00890533	0.00650039	-0.240698	-4.75997	P61289;K9J957;B3KQ25;K7ESG5;A0A087WTV2;K7ENH2;K7EMD0;K7EPX6;K7EKR3;B7Z8D3	PSME3
0.990329	0.100035	1.04409	-0.136646	-0.326286	-1.67152	+	oe_kk47	1.16984	0.0676332	0.0375124	-0.25727	-2.48794	P61313;A0A2R8YEM3;E7EQV9;E7ENU7;E7EX53;A0A2R8Y738;E7ERA2	RPL15
-0.538841	-1.23508	-0.892686	0.93796	0.782249	0.946395	+	oe_kk47	2.98803	0.00102794	0.00138193	1.03754	8.5485	P61353;K7ELC7;K7EQQ9;K7ERY7	RPL27
-1.74815	0.0755669	-0.541024	0.705854	0.826931	0.68082	+	oe_kk47	1.28732	0.0516036	0.0292664	2.24321	2.74567	P61457	PCBD1
-0.602556	0.815934	1.50414	0.108472	-0.790817	-1.03517			0.738475	0.18261	0.124196	-0.117618	-1.61035	P61586;A0A7I2V3G1;C9JNR4;C9JX21;Q5JR07;Q5JR05;A0A7I2YQV1;U3KQA9;U3KQV3;Q5JR06;E9PN11;A0A7I2V5E6;E9PLA2;C9JRM1	RHOA;RHOC
-0.54013	-0.897206	-0.858805	1.6749	0.0212444	0.599998	+	oe_kk47	1.43124	0.0370476	0.0207242	0.306936	3.07678	P61604;B8ZZL8;B8ZZ54	HSPE1
-0.706166	-1.19211	0.0267231	1.42742	0.908842	-0.464712			0.871309	0.13449	0.0839495	0.279125	1.87219	P61758	VBP1
1.29783	0.662994	0.630482	-1.25102	-0.757678	-0.58261	+	oe_kk47	2.3704	0.00426187	0.00301714	-0.805311	-5.849	P61769;H0YLF3;F5H6I0	B2M
-0.576008	-1.18836	-0.892599	1.01591	1.02139	0.61966	+	oe_kk47	2.87939	0.00132011	0.00157122	2.07019	8.00603	P61952	GNG11
1.76465	0.275306	-0.530465	-0.632799	-1.04831	0.171616			0.590158	0.256946	0.191289	-0.232072	-1.32119	P61956;Q6EEV6	SUMO2
0.391883	-1.63619	-0.835851	0.685428	0.816173	0.578553	+	oe_kk47	1.09819	0.0797646	0.0442063	0.342949	2.33557	P61960;H0Y614	UFM1
-2.00618	0.14061	0.551736	0.2638	0.647847	0.402188			0.47419	0.335591	0.27635	1.0514	1.09355	P61962;A0A087WWI6	DCAF7
-0.243462	1.58604	0.563211	-0.202105	-0.296912	-1.40677			0.90428	0.124658	0.0754652	-0.194771	-1.93804	P61964;V9GZ59;V9GYQ5;Q86VZ2	WDR5
-0.587664	-1.12496	-0.978088	0.922961	0.979085	0.788666	+	oe_kk47	3.34083	0.000456215	0.000694915	0.679237	10.5525	P61970;H3BRV9	NUTF2
1.19222	0.845034	0.596296	-0.516856	-1.02991	-1.08678	+	oe_kk47	2.66167	0.00217936	0.00202864	-0.52644	-7.01093	P61978;S4R457;S4R359	HNRNPK
1.5648	-1.42173	-0.647573	0.236558	0.0368137	0.231127			0.138585	0.7268	0.809733	0.0393327	0.374849	P61981	YWHAG
1.22746	-0.626886	1.17115	-0.00845337	-0.586543	-1.17672			0.782588	0.164973	0.110565	-0.238166	-1.6968	P62072	TIMM10
-0.808058	-1.3714	0.671866	1.15846	0.727712	-0.378577			0.588935	0.257671	0.191847	0.145716	1.3188	P62081;B5MCP9;A0A2R8Y623	RPS7
-1.6258	0.097612	-0.650094	0.728737	1.13888	0.310663	+	oe_kk47	1.23276	0.0585113	0.0324451	0.226019	2.62468	P62136;A0A7I2V4F7;E9PMD7;H0Y3Y6;F8W1A0;F8WE71	PPP1CA
0.178596	0.769232	1.48646	-1.07887	-0.472438	-0.882977	+	oe_kk47	1.74869	0.0178365	0.0111511	-0.243903	-3.88032	P62140;E7ETD8;C9JP48;C9J9S3	PPP1CB
-1.21793	-0.233045	-1.00212	1.18336	0.280176	0.989565	+	oe_kk47	1.80308	0.0157369	0.0104021	0.294472	4.02975	P62191;G3V4X1	PSMC1
-0.871427	-1.40456	0.465097	1.30032	0.594649	-0.0840782			0.816171	0.152696	0.0991007	0.144682	1.76291	P62195;J3QQM1;J3QSA9;J3KRP2;J3QLH6;J3QSE0;J3QRW1;J3QRR3;J3KTQ9	PSMC5
-0.0598597	-0.826765	-0.550142	-0.767344	1.80645	0.397658			0.544774	0.28525	0.218573	0.0541433	1.2325	P62241;Q5JR95	RPS8
-1.08712	1.77901	0.137645	-0.701028	0.1952	-0.323711			0.25217	0.559539	0.62024	-0.052892	-0.635673	P62244;I3L3P7;H3BVC7	RPS15A
-0.803191	-0.217875	0.16911	1.9171	-0.397853	-0.667287			0.260888	0.548418	0.603	0.0953916	0.654665	P62249;M0R210;M0R3H0;M0R1M5;Q6IPX4;M0QX76	RPS16
0.111279	-0.44722	-1.79792	0.832441	0.738197	0.56322	+	oe_kk47	1.16902	0.067761	0.0376813	1.28722	2.48617	P62253;I3L0Q0;I3L2Q4;K7EPR7;I3L2H7	UBE2G1
-0.754734	-1.04296	-0.922109	1.03605	0.815181	0.868563	+	oe_kk47	4.15104	7.06253e-05	0.000529412	0.239189	16.9747	P62258;B4DJF2;I3L3T1;K7EIT4;K7EM20;I3L0W5	YWHAE
2.00531	-0.153391	-0.335392	-0.72483	-0.440157	-0.351543			0.594711	0.254266	0.187626	-0.141841	-1.33007	P62266;D6RD47;D6RDJ2;D6RIX0;D6R9I7	RPS23
1.10058	0.310946	0.968786	-0.0346046	-1.14936	-1.19635	+	oe_kk47	1.60985	0.0245556	0.0144296	-0.185282	-3.51523	P62269;A0A0G2JQH2;Q5GGW2;J3JS69	RPS18
-1.7861	0.78819	0.662933	0.668302	-0.518046	0.184721			0.0875438	0.817441	0.879212	0.0292721	0.246483	P62277;J3KMX5;E9PS50	RPS13
-0.336006	-1.38011	-0.132862	0.842527	-0.431762	1.43822			0.850322	0.141149	0.0897639	0.0834802	1.83048	P62280;M0QZC5;M0R1H5;M0R1H6	RPS11
1.52824	-0.588559	0.542393	-0.0713118	0.0100457	-1.42081			0.572706	0.267482	0.200844	-0.521303	-1.28713	P62304;A6NHK2	SNRPE
0.548723	0.329406	-2.03298	0.429416	0.432869	0.292569			0.392594	0.404954	0.368971	1.6066	0.930132	P62306;A0A0B4J254;F8W0W6	SNRPF
-2.03131	0.59246	0.413779	0.364119	0.314247	0.346709			0.332768	0.464763	0.463372	1.02954	0.807295	P62310	LSM3
1.57394	0.754148	-0.661225	-0.692375	-1.01761	0.0431266			0.699484	0.199763	0.137468	-0.593337	-1.53421	P62312	LSM6
-1.67262	0.574822	-0.39931	1.12701	0.617375	-0.247277			0.582225	0.261683	0.195605	0.196124	1.30571	P62314;J3QLI9;J3QLR7	SNRPD1
1.26451	-0.8739	-1.326	-0.273319	0.796517	0.412186			0.294486	0.507591	0.533732	0.072717	0.726818	P62316;K7ERG4;K7EJB5	SNRPD2
-1.69323	-0.160603	-0.256098	0.224983	1.26992	0.615036	+	oe_kk47	1.13669	0.0729978	0.0405056	0.599407	2.41702	P62318;H3BT13	SNRPD3
-0.128562	-0.938096	-1.37555	0.817169	0.478474	1.14656	+	oe_kk47	1.77116	0.0169371	0.0107003	0.395322	3.94158	P62328	TMSB4X
-0.866889	1.16619	-1.50333	0.711535	0.224658	0.267838			0.416783	0.383016	0.337488	0.0859121	0.978991	P62330	ARF6
0.937318	0.882002	0.864959	-0.635456	-1.23972	-0.809107	+	oe_kk47	3.23171	0.00058653	0.00103704	-0.112549	-9.89023	P62424;Q5T8U2;Q5T8U3	RPL7A
-0.48748	-0.525494	0.146094	-1.38598	1.18233	1.07053			0.266764	0.541048	0.590541	0.0868772	0.667398	P62487;E9PIU7;E9PKH3;H0YEE4	POLR2G
-1.5742	1.08653	0.968136	0.149242	-0.0119433	-0.617773			0.131042	0.739534	0.820277	-0.0555026	-0.356417	P62495;B7Z7P8;I3L492;D6RJE8;D6RCB3	ETF1
1.07846	1.00328	0.558701	-0.558268	-0.901752	-1.18042	+	oe_kk47	2.7202	0.00190458	0.00187234	-1.14524	-7.26701	P62633;D6RAT4	CNBP
-1.06221	0.392032	1.13993	1.057	-0.502742	-1.024			0.127709	0.745231	0.824143	-0.0254173	-0.348216	P62701	RPS4X
0.757745	0.981858	0.894886	-0.499427	-1.32471	-0.810348	+	oe_kk47	2.6694	0.00214092	0.00205066	-2.23562	-7.0443	P62745	RHOB
1.49722	0.706995	-0.280475	0.0688765	-1.30438	-0.688233			0.922154	0.119632	0.072262	-0.205432	-1.97392	P62750;H7BY10;K7EJV9;K7ERT8;A8MUS3;K7EMA7	RPL23A
0.555158	0.947046	0.813515	-1.71284	-0.20781	-0.395065	+	oe_kk47	1.46946	0.0339266	0.0190877	-0.317678	-3.16788	P62753;A2A3R5;A2A3R7	RPS6
-1.82963	0.2418	0.315372	0.694063	0.939398	-0.360999			0.451981	0.353199	0.297839	0.147877	1.04943	P62805	HIST1H4A
[truncated: 1,820 more rows]
